# Supplementary material for: Differences in Utilization of Mental Health Treatment Among Children and Adolescents With Medicaid or Private Insurance
Source: Atypon-hosted journal article supplement (doi:10.1176/appi.ps.201800428), 2019-01-29
Supplement: appi.ps.201800428.ds001.pdf [file appi.ps.201800428.ds001.pdf]

**Appendix 1: Mental Health Disorder Diagnosis among Children and Adolescents under Medicaid (N=314,806) and Private Insurance (N=685,422; Percentage)**

| <b>Preschool Aged Children: 3-5 Years Old</b>                                                            |                 |                |
|----------------------------------------------------------------------------------------------------------|-----------------|----------------|
| <b>ICD-10 Codes</b>                                                                                      | <b>Medicaid</b> | <b>Private</b> |
| F20-F29: Schizophrenia, schizotypal and delusional disorders                                             | 3               | <1             |
| F30-F39: Mood [affective] disorders                                                                      | 38              | 9              |
| F40-F48:Neurotic, stress-related and somatoform disorders                                                | 44              | 43             |
| F50, F51, F54, F59: Behavioral syndromes associated with physiological disturbances and physical factors | 3               | 2              |
| F90-F98: Behavioral and emotional disorders with onset usually occurring in childhood and adolescence    | 64              | 71             |
| F99: Unspecified mental disorder                                                                         | 2               | <1             |
| <b>Young Children: 6-10 Years Old</b>                                                                    |                 |                |
| <b>ICD-10 Codes</b>                                                                                      | <b>Medicaid</b> | <b>Private</b> |
| F20-F29: Schizophrenia, schizotypal and delusional disorders                                             | 6               | 1              |
| F30-F39: Mood [affective] disorders                                                                      | 51              | 30             |
| F40-F48:Neurotic, stress-related and somatoform disorders                                                | 52              | 53             |
| F50, F51, F54, F59: Behavioral syndromes associated with physiological disturbances and physical factors | 3               | 3              |
| F90-F98: Behavioral and emotional disorders with onset usually occurring in childhood and adolescence    | 43              | 53             |

|                                                                                                          |                 |                |
|----------------------------------------------------------------------------------------------------------|-----------------|----------------|
| F99: Unspecified mental disorder                                                                         | 2               | <1             |
| <b>Adolescent: 12-17 Years Old</b>                                                                       |                 |                |
| <b>ICD-10 Codes</b>                                                                                      | <b>Medicaid</b> | <b>Private</b> |
| F20-F29: Schizophrenia, schizotypal and delusional disorders                                             | 12              | 2              |
| F30-F39: Mood [affective] disorders                                                                      | 63              | 43             |
| F40-F48: Neurotic, stress-related and somatoform disorders                                               | 63              | 63             |
| F50, F51, F54, F59: Behavioral syndromes associated with physiological disturbances and physical factors | 4               | 4              |
| F90-F98: Behavioral and emotional disorders with onset usually occurring in childhood and adolescence    | 15              | 34             |
| F99: Unspecified mental disorder                                                                         | 2               | <1             |

Appendix 2

| NDCNUM  | PRODNME                    | GENNME                     |
|---------|----------------------------|----------------------------|
|         | CLORAZEPATE                | Clorazepate                |
| 3013350 | DIPOTASSIUM<br>CLORAZEPATE | Dipotassium<br>Clorazepate |
| 3013360 | DIPOTASSIUM<br>CLORAZEPATE | Dipotassium<br>Clorazepate |
| 3015750 | DIPOTASSIUM<br>CLORAZEPATE | Dipotassium<br>Clorazepate |
| 3015760 | DIPOTASSIUM                | Dipotassium                |
| 3015950 | OXAZEPAM                   | Oxazepam                   |
| 3018550 | DIAZEPAM                   | Diazepam                   |
| 3018560 | DIAZEPAM                   | Diazepam                   |
| 3018575 | DIAZEPAM                   | Diazepam                   |
| 3023850 | DIAZEPAM                   | Diazepam                   |
| 3023860 | DIAZEPAM                   | Diazepam                   |
| 3023875 | DIAZEPAM                   | Diazepam                   |
| 3024550 | DIAZEPAM                   | Diazepam                   |
| 3024560 | DIAZEPAM                   | Diazepam                   |
| 3024575 | DIAZEPAM                   | Diazepam                   |
| 3029850 | LORAZEPAM                  | Lorazepam                  |
| 3029860 | LORAZEPAM                  | Lorazepam                  |
| 3029875 | LORAZEPAM                  | Lorazepam                  |
| 3040850 | LORAZEPAM                  | Lorazepam                  |
| 3040860 | LORAZEPAM                  | Lorazepam                  |
| 3040875 | LORAZEPAM                  | Lorazepam                  |
| 3048750 | LORAZEPAM                  | Lorazepam                  |
| 3048760 | LORAZEPAM                  | Lorazepam                  |
| 3048775 | LORAZEPAM                  | Lorazepam                  |
| 3057450 | OXAZEPAM                   | Oxazepam                   |
| 3059950 | OXAZEPAM                   | Oxazepam                   |
| 3059960 | OXAZEPAM                   | Oxazepam                   |
| 3073850 | TEMAZEPAM                  | Temazepam                  |
| 3074750 | TEMAZEPAM                  | Temazepam                  |
|         | CLORAZEPATE                | Clorazepate                |
| 3086250 | DIPOTASSIUM<br>CLORAZEPATE | Dipotassium<br>Clorazepate |
| 3086260 | DIPOTASSIUM<br>CLORAZEPATE | Dipotassium<br>Clorazepate |
| 3087050 | DIPOTASSIUM<br>CLORAZEPATE | Dipotassium<br>Clorazepate |
| 3087060 | DIPOTASSIUM                | Dipotassium                |

|         |                            |                             |
|---------|----------------------------|-----------------------------|
|         | CLORAZEPATE                | Clorazepate                 |
| 3090550 | DIPOTASSIUM<br>CLORAZEPATE | Dipotassium<br>Clorazepate  |
| 3090560 | DIPOTASSIUM<br>CLORAZEPATE | Dipotassium<br>Clorazepate  |
| 3091750 | DIPOTASSIUM                | Dipotassium                 |
| 4014001 | VALRELEASE                 | Diazepam                    |
| 4014064 | VALRELEASE                 | Diazepam<br>Midazolam       |
| 4016851 | VERSED                     | Hydrochloride               |
| 4193206 | VALIUM                     | Diazepam                    |
| 4193209 | VALIUM                     | Diazepam                    |
| 4193306 | VALIUM                     | Diazepam<br>Midazolam       |
| 4194601 | VERSED                     | Hydrochloride<br>Midazolam  |
| 4194701 | VERSED                     | Hydrochloride<br>Midazolam  |
| 4197301 | VERSED                     | Hydrochloride<br>Midazolam  |
| 4197401 | VERSED                     | Hydrochloride<br>Midazolam  |
| 4197501 | VERSED                     | Hydrochloride<br>Midazolam  |
| 4199806 | VERSED                     | Hydrochloride<br>Midazolam  |
| 4199901 | VERSED                     | Hydrochloride<br>Midazolam  |
| 4200006 | VERSED                     | Hydrochloride               |
| 5305723 | FLURAZEPAM HCL             | Flurazepam<br>Hydrochloride |
| 5305731 | FLURAZEPAM HCL             | Flurazepam<br>Hydrochloride |
| 5305823 | FLURAZEPAM HCL             | Flurazepam<br>Hydrochloride |
| 5305831 | FLURAZEPAM HCL             | Flurazepam<br>Hydrochloride |
| 5312823 | DIAZEPAM                   | Diazepam                    |
| 5312831 | DIAZEPAM                   | Diazepam                    |
| 5312923 | DIAZEPAM                   | Diazepam                    |
| 5312931 | DIAZEPAM                   | Diazepam                    |
| 5313023 | DIAZEPAM                   | Diazepam                    |
| 5313031 | DIAZEPAM                   | Diazepam                    |
| 5317123 | LORAZEPAM                  | Lorazepam                   |
| 5317223 | LORAZEPAM                  | Lorazepam                   |
| 5317231 | LORAZEPAM                  | Lorazepam                   |

|         |                  |                  |
|---------|------------------|------------------|
| 5317234 | LORAZEPAM        | Lorazepam        |
| 5317323 | LORAZEPAM        | Lorazepam        |
| 5317331 | LORAZEPAM        | Lorazepam        |
| 5334031 | ALPRAZOLAM       | Alprazolam       |
| 5334043 | ALPRAZOLAM       | Alprazolam       |
| 5334131 | ALPRAZOLAM       | Alprazolam       |
| 5334143 | ALPRAZOLAM       | Alprazolam       |
| 5334231 | ALPRAZOLAM       | Alprazolam       |
| 5334243 | ALPRAZOLAM       | Alprazolam       |
| 5334643 | ALPRAZOLAM       | Alprazolam       |
|         | CLORAZEPATE      | Clorazepate      |
| 5340023 | DIPOTASSIUM      | Dipotassium      |
|         | CLORAZEPATE      | Clorazepate      |
| 5340123 | DIPOTASSIUM      | Dipotassium      |
|         | CLORAZEPATE      | Clorazepate      |
| 5340223 | DIPOTASSIUM      | Dipotassium      |
|         | CLORAZEPATE      | Clorazepate      |
| 5343423 | DIPOTASSIUM      | Dipotassium      |
|         | CLORAZEPATE      | Clorazepate      |
| 5343431 | DIPOTASSIUM      | Dipotassium      |
|         | CLORAZEPATE      | Clorazepate      |
| 5343523 | DIPOTASSIUM      | Dipotassium      |
|         | CLORAZEPATE      | Clorazepate      |
| 5343531 | DIPOTASSIUM      | Dipotassium      |
|         | CLORAZEPATE      | Clorazepate      |
| 5343623 | DIPOTASSIUM      | Dipotassium      |
|         | CHLORDIAZEPOXIDE | Chlordiazepoxide |
| 5374831 | HCL              | Hydrochloride    |
|         | CHLORDIAZEPOXIDE | Chlordiazepoxide |
| 5374862 | HCL              | Hydrochloride    |
|         | CHLORDIAZEPOXIDE | Chlordiazepoxide |
| 5374931 | HCL              | Hydrochloride    |
|         | CHLORDIAZEPOXIDE | Chlordiazepoxide |
| 5374962 | HCL              | Hydrochloride    |
|         | CHLORDIAZEPOXIDE | Chlordiazepoxide |
| 5375031 | HCL              | Hydrochloride    |
|         | CHLORDIAZEPOXIDE | Chlordiazepoxide |
| 5375062 | HCL              | Hydrochloride    |
| 5378531 | TEMAZEPAM        | Temazepam        |
| 5378543 | TEMAZEPAM        | Temazepam        |
| 5378631 | TEMAZEPAM        | Temazepam        |
| 5378643 | TEMAZEPAM        | Temazepam        |
|         |                  | Chlordiazepoxide |
| 7044120 | SK-LYGEN         | Hydrochloride    |
|         |                  | Chlordiazepoxide |
| 7044125 | SK-LYGEN         | Hydrochloride    |

|         |          |                                   |
|---------|----------|-----------------------------------|
| 7044220 | SK-LYGEN | Chlordiazepoxide<br>Hydrochloride |
| 7044225 | SK-LYGEN | Chlordiazepoxide<br>Hydrochloride |
| 7044320 | SK-LYGEN | Chlordiazepoxide<br>Hydrochloride |
| 7044325 | SK-LYGEN | Chlordiazepoxide<br>Hydrochloride |
| 8000601 | SERAX    | Oxazepam                          |
| 8000602 | SERAX    | Oxazepam                          |
| 8000604 | SERAX    | Oxazepam                          |
| 8000606 | SERAX    | Oxazepam                          |
| 8000610 | SERAX    | Oxazepam                          |
| 8005101 | SERAX    | Oxazepam                          |
| 8005102 | SERAX    | Oxazepam                          |
| 8005103 | SERAX    | Oxazepam                          |
| 8005107 | SERAX    | Oxazepam                          |
| 8005201 | SERAX    | Oxazepam                          |
| 8005202 | SERAX    | Oxazepam                          |
| 8005204 | SERAX    | Oxazepam                          |
| 8005205 | SERAX    | Oxazepam                          |
| 8005209 | SERAX    | Oxazepam                          |
| 8006401 | ATIVAN   | Lorazepam                         |
| 8006402 | ATIVAN   | Lorazepam                         |
| 8006403 | ATIVAN   | Lorazepam                         |
| 8006405 | ATIVAN   | Lorazepam                         |
| 8006408 | ATIVAN   | Lorazepam                         |
| 8006409 | ATIVAN   | Lorazepam                         |
| 8006501 | ATIVAN   | Lorazepam                         |
| 8006502 | ATIVAN   | Lorazepam                         |
| 8006503 | ATIVAN   | Lorazepam                         |
| 8006505 | ATIVAN   | Lorazepam                         |
| 8006508 | ATIVAN   | Lorazepam                         |
| 8006509 | ATIVAN   | Lorazepam                         |
| 8008101 | ATIVAN   | Lorazepam                         |
| 8008102 | ATIVAN   | Lorazepam                         |
| 8008103 | ATIVAN   | Lorazepam                         |
| 8008106 | ATIVAN   | Lorazepam                         |
| 8008107 | ATIVAN   | Lorazepam                         |
| 8031701 | SERAX    | Oxazepam                          |
| 8057001 | ATIVAN   | Lorazepam                         |
| 8057002 | ATIVAN   | Lorazepam                         |
| 8057004 | ATIVAN   | Lorazepam                         |
| 8057005 | ATIVAN   | Lorazepam                         |

|         |         |            |
|---------|---------|------------|
| 8057013 | ATIVAN  | Lorazepam  |
| 8057015 | ATIVAN  | Lorazepam  |
| 8057050 | ATIVAN  | Lorazepam  |
| 8057051 | ATIVAN  | Lorazepam  |
| 8058101 | ATIVAN  | Lorazepam  |
| 8058102 | ATIVAN  | Lorazepam  |
| 8058104 | ATIVAN  | Lorazepam  |
| 8058105 | ATIVAN  | Lorazepam  |
| 8058106 | ATIVAN  | Lorazepam  |
| 8058107 | ATIVAN  | Lorazepam  |
| 8058113 | ATIVAN  | Lorazepam  |
| 8058115 | ATIVAN  | Lorazepam  |
| 8058152 | ATIVAN  | Lorazepam  |
| 8058153 | ATIVAN  | Lorazepam  |
| 8058155 | ATIVAN  | Lorazepam  |
| 9001001 | HALCION | Triazolam  |
| 9001004 | HALCION | Triazolam  |
| 9001006 | HALCION | Triazolam  |
| 9001011 | HALCION | Triazolam  |
| 9001022 | HALCION | Triazolam  |
| 9001032 | HALCION | Triazolam  |
| 9001037 | HALCION | Triazolam  |
| 9001038 | HALCION | Triazolam  |
| 9001701 | HALCION | Triazolam  |
| 9001702 | HALCION | Triazolam  |
| 9001708 | HALCION | Triazolam  |
| 9001711 | HALCION | Triazolam  |
| 9001717 | HALCION | Triazolam  |
| 9001755 | HALCION | Triazolam  |
| 9001758 | HALCION | Triazolam  |
| 9001759 | HALCION | Triazolam  |
| 9002701 | HALCION | Triazolam  |
| 9002708 | HALCION | Triazolam  |
| 9002718 | HALCION | Triazolam  |
| 9002901 | XANAX   | Alprazolam |
| 9002902 | XANAX   | Alprazolam |
| 9002903 | XANAX   | Alprazolam |
| 9002909 | XANAX   | Alprazolam |
| 9002914 | XANAX   | Alprazolam |
| 9002917 | XANAX   | Alprazolam |
| 9002920 | XANAX   | Alprazolam |
| 9002946 | XANAX   | Alprazolam |
| 9005501 | XANAX   | Alprazolam |

|          |                  |                  |
|----------|------------------|------------------|
| 9005502  | XANAX            | Alprazolam       |
| 9005503  | XANAX            | Alprazolam       |
| 9005504  | XANAX            | Alprazolam       |
| 9005515  | XANAX            | Alprazolam       |
| 9005518  | XANAX            | Alprazolam       |
| 9005522  | XANAX            | Alprazolam       |
| 9005546  | XANAX            | Alprazolam       |
| 9005707  | XANAX XR         | Alprazolam       |
| 9005907  | XANAX XR         | Alprazolam       |
| 9006607  | XANAX XR         | Alprazolam       |
| 9006807  | XANAX XR         | Alprazolam       |
| 9009001  | XANAX            | Alprazolam       |
| 9009002  | XANAX            | Alprazolam       |
| 9009004  | XANAX            | Alprazolam       |
| 9009013  | XANAX            | Alprazolam       |
| 9009015  | XANAX            | Alprazolam       |
| 9009017  | XANAX            | Alprazolam       |
| 9009027  | XANAX            | Alprazolam       |
| 9009046  | XANAX            | Alprazolam       |
| 9009401  | XANAX            | Alprazolam       |
| 9009402  | XANAX            | Alprazolam       |
| 9009403  | XANAX            | Alprazolam       |
| 9009407  | XANAX            | Alprazolam       |
|          | CHLORDIAZEPOXIDE | Chlordiazepoxide |
| 22006914 | HCL              | Hydrochloride    |
| 37900001 | DORAL            | Quazepam         |
| 37900002 | DORAL            | Quazepam         |
| 37900201 | DORAL            | Quazepam         |
| 37900202 | DORAL            | Quazepam         |
| 47014140 | DIAZEPAM         | Diazepam         |
| 47014141 | DIAZEPAM         | Diazepam         |
| 47014240 | DIAZEPAM         | Diazepam         |
| 47014241 | DIAZEPAM         | Diazepam         |
| 47014340 | DIAZEPAM         | Diazepam         |
| 47014341 | DIAZEPAM         | Diazepam         |
| 47032524 | DIAZEPAM         | Diazepam         |
| 47032530 | DIAZEPAM         | Diazepam         |
| 47032624 | DIAZEPAM         | Diazepam         |
| 47032630 | DIAZEPAM         | Diazepam         |
| 47032724 | DIAZEPAM         | Diazepam         |
| 47032730 | DIAZEPAM         | Diazepam         |
| 47043124 | LORAZEPAM        | Lorazepam        |
| 47043130 | LORAZEPAM        | Lorazepam        |

|          |                    |                             |
|----------|--------------------|-----------------------------|
| 47043224 | LORAZEPAM          | Lorazepam                   |
| 47043230 | LORAZEPAM          | Lorazepam                   |
| 47043324 | LORAZEPAM          | Lorazepam                   |
| 47043330 | LORAZEPAM          | Lorazepam                   |
|          | CLORAZEPATE        | Clorazepate                 |
| 47045124 | DIPOTASSIUM        | Dipotassium                 |
|          | CLORAZEPATE        | Clorazepate                 |
| 47045130 | DIPOTASSIUM        | Dipotassium                 |
|          | CLORAZEPATE        | Clorazepate                 |
| 47045224 | DIPOTASSIUM        | Dipotassium                 |
|          | CLORAZEPATE        | Clorazepate                 |
| 47045230 | DIPOTASSIUM        | Dipotassium                 |
|          | CLORAZEPATE        | Clorazepate                 |
| 47045324 | DIPOTASSIUM        | Dipotassium                 |
|          | CLORAZEPATE        | Clorazepate                 |
| 47045330 | DIPOTASSIUM        | Dipotassium                 |
| 47055124 | OXAZEPAM           | Oxazepam                    |
| 47066524 | OXAZEPAM           | Oxazepam                    |
| 47066530 | OXAZEPAM           | Oxazepam                    |
| 47066724 | OXAZEPAM           | Oxazepam                    |
| 47066730 | OXAZEPAM           | Oxazepam                    |
| 47069024 | OXAZEPAM           | Oxazepam                    |
| 47069030 | OXAZEPAM           | Oxazepam                    |
| 47078524 | ALPRAZOLAM         | Alprazolam                  |
| 47078530 | ALPRAZOLAM         | Alprazolam                  |
| 47078624 | ALPRAZOLAM         | Alprazolam                  |
| 47078630 | ALPRAZOLAM         | Alprazolam                  |
| 47078724 | ALPRAZOLAM         | Alprazolam                  |
| 47078730 | ALPRAZOLAM         | Alprazolam                  |
| 47097724 | TEMAZEPAM          | Temazepam                   |
| 47097730 | TEMAZEPAM          | Temazepam                   |
| 47097824 | TEMAZEPAM          | Temazepam                   |
| 47097830 | TEMAZEPAM          | Temazepam                   |
|          |                    | Flurazepam                  |
| 47098824 | FLURAZEPAM HCL     | Hydrochloride<br>Flurazepam |
| 47098924 | FLURAZEPAM HCL     | Hydrochloride               |
| 47405005 | DIAZEPAM           | Diazepam                    |
| 47405010 | DIAZEPAM           | Diazepam                    |
| 54306763 | ALPRAZOLAM         | Alprazolam                  |
|          | ALPRAZOLAM         |                             |
| 54306844 | INTENSOL           | Alprazolam                  |
| 54318544 | DIAZEPAM INTENSOL  | Diazepam                    |
| 54318863 | DIAZEPAM           | Diazepam                    |
| 54353244 | LORAZEPAM INTENSOL | Lorazepam                   |

|          |                         |                                   |
|----------|-------------------------|-----------------------------------|
| 54356699 | MIDAZOLAM HCL           | Midazolam<br>Hydrochloride        |
| 54410425 | ALPRAZOLAM              | Alprazolam                        |
| 54410429 | ALPRAZOLAM              | Alprazolam                        |
| 54410525 | ALPRAZOLAM              | Alprazolam                        |
| 54410529 | ALPRAZOLAM              | Alprazolam                        |
| 54410725 | ALPRAZOLAM              | Alprazolam                        |
| 54410729 | ALPRAZOLAM              | Alprazolam                        |
| 54420425 | DIAZEPAM                | Diazepam                          |
| 54420429 | DIAZEPAM                | Diazepam                          |
| 54420525 | DIAZEPAM                | Diazepam                          |
| 54420529 | DIAZEPAM                | Diazepam                          |
| 54420625 | DIAZEPAM                | Diazepam                          |
| 54420629 | DIAZEPAM                | Diazepam                          |
| 54485806 | TRIAZOLAM               | Triazolam                         |
| 54485829 | TRIAZOLAM               | Triazolam                         |
| 54485851 | TRIAZOLAM               | Triazolam                         |
| 54485906 | TRIAZOLAM               | Triazolam                         |
| 54485929 | TRIAZOLAM               | Triazolam                         |
| 54485951 | TRIAZOLAM               | Triazolam                         |
| 54810424 | ALPRAZOLAM              | Alprazolam                        |
| 54810425 | ALPRAZOLAM              | Alprazolam                        |
| 54810524 | ALPRAZOLAM              | Alprazolam                        |
| 54810525 | ALPRAZOLAM              | Alprazolam                        |
| 54810724 | ALPRAZOLAM              | Alprazolam                        |
| 54810725 | ALPRAZOLAM              | Alprazolam                        |
| 54820424 | DIAZEPAM                | Diazepam                          |
| 54820425 | DIAZEPAM                | Diazepam                          |
| 54820524 | DIAZEPAM                | Diazepam                          |
| 54820525 | DIAZEPAM                | Diazepam                          |
| 54820624 | DIAZEPAM                | Diazepam                          |
| 54820625 | DIAZEPAM                | Diazepam                          |
| 54820704 | DIAZEPAM                | Diazepam                          |
| 54820716 | DIAZEPAM                | Diazepam                          |
| 54820804 | DIAZEPAM                | Diazepam                          |
| 54820816 | DIAZEPAM                | Diazepam                          |
| 54885825 | TRIAZOLAM               | Triazolam                         |
| 54885925 | TRIAZOLAM               | Triazolam                         |
| 56520417 | DIAZEPAM                | Diazepam                          |
| 56520418 | DIAZEPAM                | Diazepam                          |
| 56520457 | DIAZEPAM                | Diazepam                          |
| 71080030 | CHLORDIAZEPOXIDE<br>HCL | Chlordiazepoxide<br>Hydrochloride |

|          |                           |                                   |
|----------|---------------------------|-----------------------------------|
| 71080040 | CHLORDIAZEPOXIDE<br>HCL   | Chlordiazepoxide<br>Hydrochloride |
| 71080130 | CHLORDIAZEPOXIDE<br>HCL   | Chlordiazepoxide<br>Hydrochloride |
| 71080140 | CHLORDIAZEPOXIDE<br>HCL   | Chlordiazepoxide<br>Hydrochloride |
| 71080230 | CHLORDIAZEPOXIDE<br>HCL   | Chlordiazepoxide<br>Hydrochloride |
| 71080240 | CHLORDIAZEPOXIDE<br>HCL   | Chlordiazepoxide<br>Hydrochloride |
| 74127302 | DIAZEPAM                  | Diazepam                          |
| 74127312 | DIAZEPAM                  | Diazepam                          |
| 74127322 | DIAZEPAM                  | Diazepam                          |
| 74127332 | DIAZEPAM                  | Diazepam                          |
| 74153901 | LORAZEPAM                 | Lorazepam                         |
| 74153910 | LORAZEPAM                 | Lorazepam                         |
| 74153911 | LORAZEPAM                 | Lorazepam                         |
| 74153912 | LORAZEPAM                 | Lorazepam                         |
| 74153921 | LORAZEPAM                 | Lorazepam                         |
| 74153931 | LORAZEPAM                 | Lorazepam                         |
| 74198501 | LORAZEPAM                 | Lorazepam                         |
| 74198510 | LORAZEPAM                 | Lorazepam                         |
| 74198511 | LORAZEPAM                 | Lorazepam                         |
| 74198512 | LORAZEPAM                 | Lorazepam                         |
| 74198521 | LORAZEPAM                 | Lorazepam                         |
| 74198530 | LORAZEPAM                 | Lorazepam                         |
| 74198531 | LORAZEPAM                 | Lorazepam                         |
| 74229502 | MIDAZOLAM HCL             | Midazolam<br>Hydrochloride        |
| 74229505 | MIDAZOLAM HCL             | Midazolam<br>Hydrochloride        |
| 74229532 | MIDAZOLAM HCL             | Midazolam<br>Hydrochloride        |
| 74229535 | MIDAZOLAM HCL             | Midazolam<br>Hydrochloride        |
| 74229536 | NOVATION<br>MIDAZOLAM HCL | Midazolam<br>Hydrochloride        |
| 74229539 | NOVATION<br>MIDAZOLAM HCL | Midazolam<br>Hydrochloride        |
| 74229551 | NOVATION<br>MIDAZOLAM HCL | Midazolam<br>Hydrochloride        |
| 74229552 | NOVATION                  | Midazolam<br>Hydrochloride        |
| 74229601 | MIDAZOLAM HCL             | Midazolam<br>Hydrochloride        |
| 74229602 | MIDAZOLAM HCL             | Midazolam                         |

|          |               |               |
|----------|---------------|---------------|
|          |               | Hydrochloride |
|          | MIDAZOLAM HCL | Midazolam     |
| 74229630 | NOVATION      | Hydrochloride |
|          |               | Midazolam     |
| 74229631 | MIDAZOLAM HCL | Hydrochloride |
|          |               | Midazolam     |
| 74229632 | MIDAZOLAM HCL | Hydrochloride |
|          | MIDAZOLAM HCL | Midazolam     |
| 74229636 | NOVATION      | Hydrochloride |
|          | MIDAZOLAM HCL | Midazolam     |
| 74229649 | NOVATION      | Hydrochloride |
|          | MIDAZOLAM HCL | Midazolam     |
| 74229651 | NOVATION      | Hydrochloride |
|          |               | Midazolam     |
| 74230502 | MIDAZOLAM HCL | Hydrochloride |
|          |               | Midazolam     |
| 74230505 | MIDAZOLAM HCL | Hydrochloride |
|          | MIDAZOLAM HCL | Midazolam     |
| 74230549 | NOVATION      | Hydrochloride |
|          | MIDAZOLAM HCL | Midazolam     |
| 74230550 | NOVATION      | Hydrochloride |
|          |               | Midazolam     |
| 74230662 | MIDAZOLAM HCL | Hydrochloride |
|          |               | Midazolam     |
| 74230760 | MIDAZOLAM HCL | Hydrochloride |
|          |               | Midazolam     |
| 74230762 | MIDAZOLAM HCL | Hydrochloride |
|          |               | Midazolam     |
| 74230801 | MIDAZOLAM HCL | Hydrochloride |
|          |               | Midazolam     |
| 74230802 | MIDAZOLAM HCL | Hydrochloride |
|          | MIDAZOLAM HCL | Midazolam     |
| 74230849 | NOVATION      | Hydrochloride |
|          | MIDAZOLAM HCL | Midazolam     |
| 74230850 | NOVATION      | Hydrochloride |
|          |               | Midazolam     |
| 74258702 | MIDAZOLAM HCL | Hydrochloride |
|          |               | Midazolam     |
| 74258703 | MIDAZOLAM HCL | Hydrochloride |
|          |               | Midazolam     |
| 74258705 | MIDAZOLAM HCL | Hydrochloride |
|          | MIDAZOLAM HCL | Midazolam     |
| 74258751 | NOVATION      | Hydrochloride |
|          | MIDAZOLAM HCL | Midazolam     |
| 74258752 | NOVATION      | Hydrochloride |
|          | MIDAZOLAM HCL | Midazolam     |
| 74258753 | NOVATION      | Hydrochloride |
| 74259601 | MIDAZOLAM HCL | Midazolam     |

|          |                |                  |
|----------|----------------|------------------|
|          |                | Hydrochloride    |
|          |                | Midazolam        |
| 74259602 | MIDAZOLAM HCL  | Hydrochloride    |
|          |                | Midazolam        |
| 74259603 | MIDAZOLAM HCL  | Hydrochloride    |
|          |                | Midazolam        |
| 74259605 | MIDAZOLAM HCL  | Hydrochloride    |
|          | MIDAZOLAM HCL  | Midazolam        |
| 74259649 | NOVATION       | Hydrochloride    |
|          | MIDAZOLAM HCL  | Midazolam        |
| 74259651 | NOVATION       | Hydrochloride    |
|          | MIDAZOLAM HCL  | Midazolam        |
| 74259652 | NOVATION       | Hydrochloride    |
|          | MIDAZOLAM HCL  | Midazolam        |
| 74259653 | NOVATION       | Hydrochloride    |
|          |                | Chlordiazepoxide |
| 74264853 | A-POXIDE       | Hydrochloride    |
|          |                | Chlordiazepoxide |
| 74264953 | A-POXIDE       | Hydrochloride    |
|          |                | Chlordiazepoxide |
| 74265013 | A-POXIDE       | Hydrochloride    |
|          |                | Clorazepate      |
| 74269913 | TRANXENE-SD    | Dipotassium      |
|          |                | Clorazepate      |
| 74299713 | TRANXENE-SD    | Dipotassium      |
| 74321001 | DIAZEPAM       | Diazepam         |
| 74321032 | DIAZEPAM       | Diazepam         |
| 74321301 | DIAZEPAM       | Diazepam         |
| 74321302 | DIAZEPAM       | Diazepam         |
|          |                | Clorazepate      |
| 74341711 | TRANXENE       | Dipotassium      |
| 74373511 | PROSOM         | Estazolam        |
| 74373513 | PROSOM         | Estazolam        |
| 74373611 | PROSOM         | Estazolam        |
| 74373613 | PROSOM         | Estazolam        |
|          |                | Clorazepate      |
| 74438911 | TRANXENE T-TAB | Dipotassium      |
|          |                | Clorazepate      |
| 74438913 | TRANXENE T-TAB | Dipotassium      |
|          |                | Clorazepate      |
| 74438953 | TRANXENE T-TAB | Dipotassium      |
|          |                | Clorazepate      |
| 74439011 | TRANXENE T-TAB | Dipotassium      |
|          |                | Clorazepate      |
| 74439013 | TRANXENE T-TAB | Dipotassium      |
|          |                | Clorazepate      |
| 74439053 | TRANXENE T-TAB | Dipotassium      |

|          |                            |                            |
|----------|----------------------------|----------------------------|
| 74439111 | TRANXENE T-TAB             | Clorazepate<br>Dipotassium |
| 74439113 | TRANXENE T-TAB             | Clorazepate<br>Dipotassium |
| 74439153 | TRANXENE T-TAB             | Clorazepate<br>Dipotassium |
| 74677601 | LORAZEPAM                  | Lorazepam                  |
| 74677701 | LORAZEPAM                  | Lorazepam                  |
| 74677801 | LORAZEPAM                  | Lorazepam                  |
| 74677802 | LORAZEPAM                  | Lorazepam                  |
| 74677861 | LORAZEPAM AMERINET         | Lorazepam                  |
| 74677862 | LORAZEPAM AMERINET         | Lorazepam                  |
| 74677901 | LORAZEPAM                  | Lorazepam                  |
| 74677902 | LORAZEPAM                  | Lorazepam                  |
| 74678001 | LORAZEPAM                  | Lorazepam                  |
| 74678002 | LORAZEPAM                  | Lorazepam                  |
| 74678101 | LORAZEPAM                  | Lorazepam                  |
| 74678102 | LORAZEPAM                  | Lorazepam                  |
| 78009805 | RESTORIL                   | Temazepam                  |
| 78009806 | RESTORIL                   | Temazepam                  |
| 78009808 | RESTORIL                   | Temazepam                  |
| 78009813 | RESTORIL                   | Temazepam                  |
| 78009865 | RESTORIL                   | Temazepam                  |
| 78009905 | RESTORIL                   | Temazepam                  |
| 78009906 | RESTORIL                   | Temazepam                  |
| 78009908 | RESTORIL                   | Temazepam                  |
| 78009913 | RESTORIL                   | Temazepam                  |
| 78009965 | RESTORIL                   | Temazepam                  |
| 78014005 | RESTORIL                   | Temazepam                  |
| 78014006 | RESTORIL                   | Temazepam                  |
| 78014013 | RESTORIL                   | Temazepam                  |
| 78014065 | RESTORIL                   | Temazepam                  |
| 85072204 | DORMALIN                   | Quazepam                   |
| 91332101 | NIRAVAM                    | Alprazolam                 |
| 91332201 | NIRAVAM                    | Alprazolam                 |
| 91332301 | NIRAVAM                    | Alprazolam                 |
| 91332401 | NIRAVAM                    | Alprazolam                 |
| 93012901 | ESTAZOLAM                  | Estazolam                  |
| 93013001 | ESTAZOLAM                  | Estazolam                  |
| 93020101 | CLORAZEPATE                | Clorazepate                |
| 93020105 | DIPOTASSIUM<br>CLORAZEPATE | Dipotassium<br>Clorazepate |
| 93020201 | DIPOTASSIUM<br>CLORAZEPATE | Dipotassium<br>Clorazepate |

|          |                  |                  |
|----------|------------------|------------------|
|          | DIPOTASSIUM      | Dipotassium      |
|          | CLORAZEPATE      | Clorazepate      |
| 93020205 | DIPOTASSIUM      | Dipotassium      |
|          | CLORAZEPATE      | Clorazepate      |
| 93020301 | DIPOTASSIUM      | Dipotassium      |
| 93046702 | DIAZEPAM         | Diazepam         |
| 93046743 | DIAZEPAM         | Diazepam         |
| 93046758 | DIAZEPAM         | Diazepam         |
| 93046767 | DIAZEPAM         | Diazepam         |
| 93047201 | DIAZEPAM         | Diazepam         |
| 93047210 | DIAZEPAM         | Diazepam         |
| 93047301 | DIAZEPAM         | Diazepam         |
| 93047310 | DIAZEPAM         | Diazepam         |
| 93047401 | DIAZEPAM         | Diazepam         |
| 93047410 | DIAZEPAM         | Diazepam         |
|          |                  | Flurazepam       |
| 93048101 | FLURAZEPAM HCL   | Hydrochloride    |
|          |                  | Flurazepam       |
| 93048201 | FLURAZEPAM HCL   | Hydrochloride    |
|          |                  | Flurazepam       |
| 93048205 | FLURAZEPAM HCL   | Hydrochloride    |
| 93055601 | TEMAZEPAM        | Temazepam        |
| 93060601 | LORAZEPAM        | Lorazepam        |
| 93060701 | LORAZEPAM        | Lorazepam        |
| 93060705 | LORAZEPAM        | Lorazepam        |
| 93060801 | LORAZEPAM        | Lorazepam        |
|          | CHLORDIAZEPOXIDE | Chlordiazepoxide |
| 93095701 | HCL              | Hydrochloride    |
|          | CHLORDIAZEPOXIDE | Chlordiazepoxide |
| 93095705 | HCL              | Hydrochloride    |
|          | CHLORDIAZEPOXIDE | Chlordiazepoxide |
| 93095710 | HCL              | Hydrochloride    |
|          | CHLORDIAZEPOXIDE | Chlordiazepoxide |
| 93095901 | HCL              | Hydrochloride    |
|          | CHLORDIAZEPOXIDE | Chlordiazepoxide |
| 93095905 | HCL              | Hydrochloride    |
|          | CHLORDIAZEPOXIDE | Chlordiazepoxide |
| 93095910 | HCL              | Hydrochloride    |
|          | CHLORDIAZEPOXIDE | Chlordiazepoxide |
| 93096101 | HCL              | Hydrochloride    |
|          | CHLORDIAZEPOXIDE | Chlordiazepoxide |
| 93096105 | HCL              | Hydrochloride    |
| 93482001 | LORAZEPAM        | Lorazepam        |
| 93482005 | LORAZEPAM        | Lorazepam        |
| 93482010 | LORAZEPAM        | Lorazepam        |

|           |                  |                    |
|-----------|------------------|--------------------|
| 93482101  | LORAZEPAM        | Lorazepam          |
| 93482105  | LORAZEPAM        | Lorazepam          |
| 93482110  | LORAZEPAM        | Lorazepam          |
| 93482201  | LORAZEPAM        | Lorazepam          |
| 93482205  | LORAZEPAM        | Lorazepam          |
| 93482210  | LORAZEPAM        | Lorazepam          |
| 93545006  | ALPRAZOLAM       | Alprazolam         |
| 93545106  | ALPRAZOLAM       | Alprazolam         |
| 93545206  | ALPRAZOLAM       | Alprazolam         |
| 93545306  | ALPRAZOLAM       | Alprazolam         |
|           | DIAZEPAM RECTAL  |                    |
| 93613732  | DELIVERY SYSTEM  | Diazepam;lubricant |
|           | DIAZEPAM RECTAL  |                    |
| 93613832  | DELIVERY SYSTEM  | Diazepam;lubricant |
|           | DIAZEPAM RECTAL  |                    |
| 93613932  | DELIVERY SYSTEM  | Diazepam;lubricant |
|           | CHLORDIAZEPOXIDE | Chlordiazepoxide   |
| 102141005 | HCL              | Hydrochloride      |
|           | CHLORDIAZEPOXIDE | Chlordiazepoxide   |
| 102142001 | HCL              | Hydrochloride      |
|           | CHLORDIAZEPOXIDE | Chlordiazepoxide   |
| 102143001 | HCL              | Hydrochloride      |
| 102330501 | DIAZEPAM         | Diazepam           |
| 102331005 | DIAZEPAM         | Diazepam           |
| 102331501 | DIAZEPAM         | Diazepam           |
| 102339001 | LORAZEPAM        | Lorazepam          |
| 102339501 | LORAZEPAM        | Lorazepam          |
| 102340001 | LORAZEPAM        | Lorazepam          |
|           |                  | Flurazepam         |
| 102340501 | FLURAZEPAM HCL   | Hydrochloride      |
|           |                  | Flurazepam         |
| 102341001 | FLURAZEPAM HCL   | Hydrochloride      |
| 102357501 | TEMAZEPAM        | Temazepam          |
| 102358001 | TEMAZEPAM        | Temazepam          |
| 102364501 | OXAZEPAM         | Oxazepam           |
| 102365001 | OXAZEPAM         | Oxazepam           |
| 102365501 | OXAZEPAM         | Oxazepam           |
|           | CLORAZEPATE      | Clorazepate        |
| 102383501 | DIPOTASSIUM      | Dipotassium        |
|           | CLORAZEPATE      | Clorazepate        |
| 102384001 | DIPOTASSIUM      | Dipotassium        |
|           | CLORAZEPATE      | Clorazepate        |
| 102384501 | DIPOTASSIUM      | Dipotassium        |
|           | CHLORDIAZEPOXIDE | Chlordiazepoxide   |
| 115275801 | HCL              | Hydrochloride      |

|           |                         |                                   |
|-----------|-------------------------|-----------------------------------|
| 115275803 | CHLORDIAZEPOXIDE<br>HCL | Chlordiazepoxide<br>Hydrochloride |
| 115276001 | CHLORDIAZEPOXIDE<br>HCL | Chlordiazepoxide<br>Hydrochloride |
| 115276003 | CHLORDIAZEPOXIDE<br>HCL | Chlordiazepoxide<br>Hydrochloride |
| 115276201 | CHLORDIAZEPOXIDE<br>HCL | Chlordiazepoxide<br>Hydrochloride |
| 115276203 | CHLORDIAZEPOXIDE<br>HCL | Chlordiazepoxide<br>Hydrochloride |
| 121077001 | LORAZEPAM               | Lorazepam                         |
| 140000101 | LIBRIUM                 | Chlordiazepoxide<br>Hydrochloride |
| 140000114 | LIBRIUM                 | Chlordiazepoxide<br>Hydrochloride |
| 140000149 | LIBRIUM                 | Chlordiazepoxide<br>Hydrochloride |
| 140000150 | LIBRIUM                 | Chlordiazepoxide<br>Hydrochloride |
| 140000201 | LIBRIUM                 | Chlordiazepoxide<br>Hydrochloride |
| 140000214 | LIBRIUM                 | Chlordiazepoxide<br>Hydrochloride |
| 140000249 | LIBRIUM                 | Chlordiazepoxide<br>Hydrochloride |
| 140000250 | LIBRIUM                 | Chlordiazepoxide<br>Hydrochloride |
| 140000301 | LIBRIUM                 | Chlordiazepoxide<br>Hydrochloride |
| 140000314 | LIBRIUM                 | Chlordiazepoxide<br>Hydrochloride |
| 140000349 | LIBRIUM                 | Chlordiazepoxide<br>Hydrochloride |
| 140000350 | LIBRIUM                 | Chlordiazepoxide<br>Hydrochloride |
| 140000401 | VALIUM                  | Diazepam                          |
| 140000414 | VALIUM                  | Diazepam                          |
| 140000432 | VALIUM                  | Diazepam                          |
| 140000443 | VALIUM TABLETS          | Diazepam                          |
| 140000449 | VALIUM                  | Diazepam                          |
| 140000450 | VALIUM                  | Diazepam                          |
| 140000501 | VALIUM                  | Diazepam                          |
| 140000514 | VALIUM                  | Diazepam                          |
| 140000522 | VALIUM TABLETS          | Diazepam                          |
| 140000535 | VALIUM                  | Diazepam                          |
| 140000543 | VALIUM TABLETS          | Diazepam                          |

|           |                |                                   |
|-----------|----------------|-----------------------------------|
| 140000549 | VALIUM         | Diazepam                          |
| 140000550 | VALIUM         | Diazepam                          |
| 140000551 | VALIUM TABLETS | Diazepam                          |
| 140000552 | VALIUM TABLETS | Diazepam                          |
| 140000601 | VALIUM         | Diazepam                          |
| 140000614 | VALIUM         | Diazepam                          |
| 140000622 | VALIUM         | Diazepam                          |
| 140000635 | VALIUM         | Diazepam                          |
| 140000643 | VALIUM TABLETS | Diazepam                          |
| 140000649 | VALIUM         | Diazepam                          |
| 140000650 | VALIUM         | Diazepam                          |
| 140000651 | VALIUM         | Diazepam                          |
| 140000652 | VALIUM         | Diazepam                          |
| 140001314 | LIBRITABS      | Chlordiazepoxide<br>Hydrochloride |
| 140001401 | LIBRITABS      | Chlordiazepoxide<br>Hydrochloride |
| 140001414 | LIBRITABS      | Chlordiazepoxide<br>Hydrochloride |
| 140006501 | DALMANE        | Flurazepam<br>Hydrochloride       |
| 140006503 | DALMANE        | Flurazepam<br>Hydrochloride       |
| 140006514 | DALMANE        | Flurazepam<br>Hydrochloride       |
| 140006527 | DALMANE        | Flurazepam<br>Hydrochloride       |
| 140006549 | DALMANE        | Flurazepam<br>Hydrochloride       |
| 140006550 | DALMANE        | Flurazepam<br>Hydrochloride       |
| 140006601 | DALMANE        | Flurazepam<br>Hydrochloride       |
| 140006603 | DALMANE        | Flurazepam<br>Hydrochloride       |
| 140006614 | DALMANE        | Flurazepam<br>Hydrochloride       |
| 140006627 | DALMANE        | Flurazepam<br>Hydrochloride       |
| 140006649 | DALMANE        | Flurazepam<br>Hydrochloride       |
| 140006650 | DALMANE        | Flurazepam<br>Hydrochloride       |
| 140191206 | LIBRIUM        | Chlordiazepoxide<br>Hydrochloride |
| 140193106 | VALIUM         | Diazepam                          |

|           |                  |                  |
|-----------|------------------|------------------|
| 140193201 | VALIUM           | Diazepam         |
| 140193206 | VALIUM           | Diazepam         |
| 140193306 | VALIUM           | Diazepam         |
| 143122005 | DIAZEPAM         | Diazepam         |
| 143122025 | DIAZEPAM         | Diazepam         |
| 143122052 | DIAZEPAM         | Diazepam         |
| 143122205 | DIAZEPAM         | Diazepam         |
| 143122225 | DIAZEPAM         | Diazepam         |
| 143122252 | DIAZEPAM         | Diazepam         |
| 143122505 | DIAZEPAM         | Diazepam         |
| 143122525 | DIAZEPAM         | Diazepam         |
| 143122552 | DIAZEPAM         | Diazepam         |
| 143127225 | LORAZEPAM        | Lorazepam        |
| 143127252 | LORAZEPAM        | Lorazepam        |
| 143127325 | LORAZEPAM        | Lorazepam        |
| 143127352 | LORAZEPAM        | Lorazepam        |
| 143127425 | LORAZEPAM        | Lorazepam        |
| 143127452 | LORAZEPAM        | Lorazepam        |
|           | CHLORDIAZEPOXIDE | Chlordiazepoxide |
| 143309001 | HCL              | Hydrochloride    |
|           | CHLORDIAZEPOXIDE | Chlordiazepoxide |
| 143309005 | HCL              | Hydrochloride    |
|           | CHLORDIAZEPOXIDE | Chlordiazepoxide |
| 143309010 | HCL              | Hydrochloride    |
|           | CHLORDIAZEPOXIDE | Chlordiazepoxide |
| 143309025 | HCL              | Hydrochloride    |
|           | CHLORDIAZEPOXIDE | Chlordiazepoxide |
| 143309301 | HCL              | Hydrochloride    |
|           | CHLORDIAZEPOXIDE | Chlordiazepoxide |
| 143309305 | HCL              | Hydrochloride    |
|           | CHLORDIAZEPOXIDE | Chlordiazepoxide |
| 143309310 | HCL              | Hydrochloride    |
|           | CHLORDIAZEPOXIDE | Chlordiazepoxide |
| 143309325 | HCL              | Hydrochloride    |
|           | CHLORDIAZEPOXIDE | Chlordiazepoxide |
| 143309501 | HCL              | Hydrochloride    |
|           | CHLORDIAZEPOXIDE | Chlordiazepoxide |
| 143309505 | HCL              | Hydrochloride    |
|           | CHLORDIAZEPOXIDE | Chlordiazepoxide |
| 143309510 | HCL              | Hydrochloride    |
|           | CHLORDIAZEPOXIDE | Chlordiazepoxide |
| 143309525 | HCL              | Hydrochloride    |
| 143332552 | TEMAZEPAM        | Temazepam        |
| 143332752 | TEMAZEPAM        | Temazepam        |
| 143336701 | FLURAZEPAM HCL   | Flurazepam       |

|           |                  |                  |
|-----------|------------------|------------------|
|           |                  | Hydrochloride    |
|           |                  | Flurazepam       |
| 143336705 | FLURAZEPAM HCL   | Hydrochloride    |
|           |                  | Flurazepam       |
| 143336710 | FLURAZEPAM HCL   | Hydrochloride    |
|           |                  | Flurazepam       |
| 143336725 | FLURAZEPAM HCL   | Hydrochloride    |
|           |                  | Flurazepam       |
| 143336730 | FLURAZEPAM HCL   | Hydrochloride    |
|           |                  | Flurazepam       |
| 143336752 | FLURAZEPAM HCL   | Hydrochloride    |
|           |                  | Flurazepam       |
| 143337001 | FLURAZEPAM HCL   | Hydrochloride    |
|           |                  | Flurazepam       |
| 143337005 | FLURAZEPAM HCL   | Hydrochloride    |
|           |                  | Flurazepam       |
| 143337010 | FLURAZEPAM HCL   | Hydrochloride    |
|           |                  | Flurazepam       |
| 143337025 | FLURAZEPAM HCL   | Hydrochloride    |
|           |                  | Flurazepam       |
| 143337030 | FLURAZEPAM HCL   | Hydrochloride    |
|           |                  | Flurazepam       |
| 143337052 | FLURAZEPAM HCL   | Hydrochloride    |
|           | CHLORDIAZEPOXIDE | Chlordiazepoxide |
| 144127602 | HCL              | Hydrochloride    |
|           | CHLORDIAZEPOXIDE | Chlordiazepoxide |
| 144127702 | HCL              | Hydrochloride    |
|           | CHLORDIAZEPOXIDE | Chlordiazepoxide |
| 144127703 | HCL              | Hydrochloride    |
|           | CHLORDIAZEPOXIDE | Chlordiazepoxide |
| 144127802 | HCL              | Hydrochloride    |
|           | CHLORDIAZEPOXIDE | Chlordiazepoxide |
| 150008040 | HCL              | Hydrochloride    |
|           | CHLORDIAZEPOXIDE | Chlordiazepoxide |
| 150008140 | HCL              | Hydrochloride    |
|           | CHLORDIAZEPOXIDE | Chlordiazepoxide |
| 150008240 | HCL              | Hydrochloride    |
|           |                  | Flurazepam       |
| 157022101 | FLURAZEPAM HCL   | Hydrochloride    |
|           |                  | Flurazepam       |
| 157022105 | FLURAZEPAM HCL   | Hydrochloride    |
|           |                  | Flurazepam       |
| 157022601 | FLURAZEPAM HCL   | Hydrochloride    |
|           |                  | Flurazepam       |
| 157022605 | FLURAZEPAM HCL   | Hydrochloride    |
|           | CLORAZEPATE      | Clorazepate      |
| 157024101 | DIPOTASSIUM      | Dipotassium      |
| 157024105 | CLORAZEPATE      | Clorazepate      |

|           |                  |                  |
|-----------|------------------|------------------|
|           | DIPOTASSIUM      | Dipotassium      |
|           | CLORAZEPATE      | Clorazepate      |
| 157024201 | DIPOTASSIUM      | Dipotassium      |
|           | CLORAZEPATE      | Clorazepate      |
| 157024205 | DIPOTASSIUM      | Dipotassium      |
|           | CLORAZEPATE      | Clorazepate      |
| 157024301 | DIPOTASSIUM      | Dipotassium      |
| 157024701 | LORAZEPAM        | Lorazepam        |
| 157024705 | LORAZEPAM        | Lorazepam        |
| 157024801 | LORAZEPAM        | Lorazepam        |
| 157024805 | LORAZEPAM        | Lorazepam        |
| 157024810 | LORAZEPAM        | Lorazepam        |
| 157024901 | LORAZEPAM        | Lorazepam        |
| 157024905 | LORAZEPAM        | Lorazepam        |
| 157024910 | LORAZEPAM        | Lorazepam        |
|           | CHLORDIAZEPOXIDE | Chlordiazepoxide |
| 157041601 | HCL              | Hydrochloride    |
|           | CHLORDIAZEPOXIDE | Chlordiazepoxide |
| 157041605 | HCL              | Hydrochloride    |
|           | CHLORDIAZEPOXIDE | Chlordiazepoxide |
| 157041701 | HCL              | Hydrochloride    |
|           | CHLORDIAZEPOXIDE | Chlordiazepoxide |
| 157041705 | HCL              | Hydrochloride    |
|           | CHLORDIAZEPOXIDE | Chlordiazepoxide |
| 157041710 | HCL              | Hydrochloride    |
|           | CHLORDIAZEPOXIDE | Chlordiazepoxide |
| 157041801 | HCL              | Hydrochloride    |
|           | CHLORDIAZEPOXIDE | Chlordiazepoxide |
| 157041805 | HCL              | Hydrochloride    |
| 157054305 | DIAZEPAM         | Diazepam         |
| 157054405 | DIAZEPAM         | Diazepam         |
| 157054505 | DIAZEPAM         | Diazepam         |
|           | CHLORDIAZEPOXIDE | Chlordiazepoxide |
| 172201360 | HCL              | Hydrochloride    |
|           | CHLORDIAZEPOXIDE | Chlordiazepoxide |
| 172201370 | HCL              | Hydrochloride    |
|           | CHLORDIAZEPOXIDE | Chlordiazepoxide |
| 172201380 | HCL              | Hydrochloride    |
|           | CHLORDIAZEPOXIDE | Chlordiazepoxide |
| 172201560 | HCL              | Hydrochloride    |
|           | CHLORDIAZEPOXIDE | Chlordiazepoxide |
| 172201570 | HCL              | Hydrochloride    |
|           | CHLORDIAZEPOXIDE | Chlordiazepoxide |
| 172201580 | HCL              | Hydrochloride    |
| 172392560 | DIAZEPAM         | Diazepam         |
| 172392570 | DIAZEPAM         | Diazepam         |

|           |                  |                  |
|-----------|------------------|------------------|
| 172392580 | DIAZEPAM         | Diazepam         |
| 172392660 | DIAZEPAM         | Diazepam         |
| 172392670 | DIAZEPAM         | Diazepam         |
| 172392680 | DIAZEPAM         | Diazepam         |
| 172392760 | DIAZEPAM         | Diazepam         |
| 172392770 | DIAZEPAM         | Diazepam         |
| 172392780 | DIAZEPAM         | Diazepam         |
|           | CHLORDIAZEPOXIDE | Chlordiazepoxide |
| 172397760 | HCL              | Hydrochloride    |
|           | CHLORDIAZEPOXIDE | Chlordiazepoxide |
| 172397770 | HCL              | Hydrochloride    |
|           | CHLORDIAZEPOXIDE | Chlordiazepoxide |
| 172397780 | HCL              | Hydrochloride    |
| 172403660 | ESTAZOLAM        | Estazolam        |
| 172403760 | ESTAZOLAM        | Estazolam        |
| 172480460 | OXAZEPAM         | Oxazepam         |
| 172480470 | OXAZEPAM         | Oxazepam         |
| 172480560 | OXAZEPAM         | Oxazepam         |
| 172480570 | OXAZEPAM         | Oxazepam         |
| 172480660 | OXAZEPAM         | Oxazepam         |
| 172480670 | OXAZEPAM         | Oxazepam         |
| 172560060 | LORAZEPAM        | Lorazepam        |
| 172560070 | LORAZEPAM        | Lorazepam        |
| 172560080 | LORAZEPAM        | Lorazepam        |
| 172580060 | LORAZEPAM        | Lorazepam        |
| 172580070 | LORAZEPAM        | Lorazepam        |
| 172580080 | LORAZEPAM        | Lorazepam        |
| 172600060 | LORAZEPAM        | Lorazepam        |
| 172600070 | LORAZEPAM        | Lorazepam        |
| 172600080 | LORAZEPAM        | Lorazepam        |
| 181065400 | PROBATE          | Lorazepam        |
|           | CLORAZEPATE      | Clorazepate      |
| 182000901 | DIPOTASSIUM      | Dipotassium      |
|           | CLORAZEPATE      | Clorazepate      |
| 182000905 | DIPOTASSIUM      | Dipotassium      |
|           | CLORAZEPATE      | Clorazepate      |
| 182001001 | DIPOTASSIUM      | Dipotassium      |
|           | CLORAZEPATE      | Clorazepate      |
| 182001005 | DIPOTASSIUM      | Dipotassium      |
|           | CLORAZEPATE      | Clorazepate      |
| 182001401 | DIPOTASSIUM      | Dipotassium      |
| 182002701 | ALPRAZOLAM       | Alprazolam       |
| 182002705 | ALPRAZOLAM       | Alprazolam       |
| 182002789 | ALPRAZOLAM       | Alprazolam       |

|           |                  |                  |
|-----------|------------------|------------------|
| 182002801 | ALPRAZOLAM       | Alprazolam       |
| 182002805 | ALPRAZOLAM       | Alprazolam       |
| 182002889 | ALPRAZOLAM       | Alprazolam       |
| 182002901 | ALPRAZOLAM       | Alprazolam       |
| 182002905 | ALPRAZOLAM       | Alprazolam       |
| 182002989 | ALPRAZOLAM       | Alprazolam       |
| 182003001 | ALPRAZOLAM       | Alprazolam       |
| 182009463 | DIAZEPAM         | Diazepam         |
| 182017513 | TRIAZOLAM        | Triazolam        |
| 182017605 | TRIAZOLAM        | Triazolam        |
| 182017613 | TRIAZOLAM        | Triazolam        |
| 182021201 | OXAZEPAM         | Oxazepam         |
| 182097701 | CHLORDIAZEPOXIDE | Chlordiazepoxide |
|           | HCL              | Hydrochloride    |
| 182097705 | CHLORDIAZEPOXIDE | Chlordiazepoxide |
|           | HCL              | Hydrochloride    |
| 182097710 | CHLORDIAZEPOXIDE | Chlordiazepoxide |
|           | HCL              | Hydrochloride    |
| 182097789 | CHLORDIAZEPOXIDE | Chlordiazepoxide |
|           | HCL              | Hydrochloride    |
| 182097801 | CHLORDIAZEPOXIDE | Chlordiazepoxide |
|           | HCL              | Hydrochloride    |
| 182097805 | CHLORDIAZEPOXIDE | Chlordiazepoxide |
|           | HCL              | Hydrochloride    |
| 182097810 | CHLORDIAZEPOXIDE | Chlordiazepoxide |
|           | HCL              | Hydrochloride    |
| 182097889 | CHLORDIAZEPOXIDE | Chlordiazepoxide |
|           | HCL              | Hydrochloride    |
| 182097901 | CHLORDIAZEPOXIDE | Chlordiazepoxide |
|           | HCL              | Hydrochloride    |
| 182097905 | CHLORDIAZEPOXIDE | Chlordiazepoxide |
|           | HCL              | Hydrochloride    |
| 182097910 | CHLORDIAZEPOXIDE | Chlordiazepoxide |
|           | HCL              | Hydrochloride    |
| 182097989 | CHLORDIAZEPOXIDE | Chlordiazepoxide |
|           | HCL              | Hydrochloride    |
| 182123001 | OXAZEPAM         | Oxazepam         |
| 182123101 | OXAZEPAM         | Oxazepam         |
| 182123201 | OXAZEPAM         | Oxazepam         |
| 182129001 | OXAZEPAM         | Oxazepam         |
| 182129101 | OXAZEPAM         | Oxazepam         |
| 182129201 | OXAZEPAM         | Oxazepam         |
|           | CHLORDIAZEPOXIDE | Chlordiazepoxide |
| 182162289 | HCL              | Hydrochloride    |
|           | CHLORDIAZEPOXIDE |                  |
| 182162389 | HCL              | Inactive Record  |

CHLORDIAZEPOXIDE

|           |                |                             |
|-----------|----------------|-----------------------------|
| 182162489 | HCL            | Inactive Record             |
| 182175501 | DIAZEPAM       | Diazepam                    |
| 182175505 | DIAZEPAM       | Diazepam                    |
| 182175510 | DIAZEPAM       | Diazepam                    |
| 182175589 | DIAZEPAM       | Diazepam                    |
| 182175601 | DIAZEPAM       | Diazepam                    |
| 182175605 | DIAZEPAM       | Diazepam                    |
| 182175610 | DIAZEPAM       | Diazepam                    |
| 182175689 | DIAZEPAM       | Diazepam                    |
| 182175701 | DIAZEPAM       | Diazepam                    |
| 182175705 | DIAZEPAM       | Diazepam                    |
| 182175710 | DIAZEPAM       | Diazepam                    |
| 182175789 | DIAZEPAM       | Diazepam                    |
| 182180601 | LORAZEPAM      | Lorazepam                   |
| 182180605 | LORAZEPAM      | Lorazepam                   |
| 182180610 | LORAZEPAM      | Lorazepam                   |
| 182180689 | LORAZEPAM      | Lorazepam                   |
| 182180701 | LORAZEPAM      | Lorazepam                   |
| 182180705 | LORAZEPAM      | Lorazepam                   |
| 182180710 | LORAZEPAM      | Lorazepam                   |
| 182180789 | LORAZEPAM      | Lorazepam                   |
| 182180801 | LORAZEPAM      | Lorazepam                   |
| 182180805 | LORAZEPAM      | Lorazepam                   |
| 182180810 | LORAZEPAM      | Lorazepam                   |
| 182180889 | LORAZEPAM      | Lorazepam<br>Flurazepam     |
| 182181701 | FLURAZEPAM HCL | Hydrochloride<br>Flurazepam |
| 182181705 | FLURAZEPAM HCL | Hydrochloride<br>Flurazepam |
| 182181789 | FLURAZEPAM HCL | Hydrochloride<br>Flurazepam |
| 182181801 | FLURAZEPAM HCL | Hydrochloride<br>Flurazepam |
| 182181805 | FLURAZEPAM HCL | Hydrochloride<br>Flurazepam |
| 182181889 | FLURAZEPAM HCL | Hydrochloride               |
| 182182201 | TEMAZEPAM      | Temazepam                   |
| 182182205 | TEMAZEPAM      | Temazepam                   |
| 182182289 | TEMAZEPAM      | Temazepam                   |
| 182182301 | TEMAZEPAM      | Temazepam                   |
| 182182305 | TEMAZEPAM      | Temazepam                   |
| 182182389 | TEMAZEPAM      | Temazepam                   |

|           |                  |                    |
|-----------|------------------|--------------------|
| 182823789 | LORAZEPAM        | Lorazepam          |
| 182823889 | LORAZEPAM        | Lorazepam          |
| 182823989 | LORAZEPAM        | Lorazepam          |
| 185019560 | ALPRAZOLAM       | Alprazolam         |
| 185019660 | ALPRAZOLAM       | Alprazolam         |
| 185019760 | ALPRAZOLAM       | Alprazolam         |
| 185019860 | ALPRAZOLAM       | Alprazolam         |
| 185060501 | CHLORDIAZEPOXIDE | Chlordiazepoxide   |
|           | HCL              | Hydrochloride      |
| 185060505 | CHLORDIAZEPOXIDE | Chlordiazepoxide   |
|           | HCL              | Hydrochloride      |
| 185060510 | CHLORDIAZEPOXIDE | Chlordiazepoxide   |
|           | HCL              | Hydrochloride      |
| 185061005 | CHLORDIAZEPOXIDE | Chlordiazepoxide   |
|           | HCL              | Hydrochloride      |
| 185062501 | CHLORDIAZEPOXIDE | Chlordiazepoxide   |
|           | HCL              | Hydrochloride      |
| 185062505 | CHLORDIAZEPOXIDE | Chlordiazepoxide   |
|           | HCL              | Hydrochloride      |
| 185062510 | CHLORDIAZEPOXIDE | Chlordiazepoxide   |
| 187006301 | ATIVAN           | Lorazepam          |
| 187006401 | ATIVAN           | Lorazepam          |
| 187006410 | ATIVAN           | Lorazepam          |
| 187006501 | ATIVAN           | Lorazepam          |
| 187065820 | DIASTAT ACUDIAL  | Diazepam;lubricant |
| 187320110 | LIBRIUM          | Chlordiazepoxide   |
|           |                  | Hydrochloride      |
|           |                  | Chlordiazepoxide   |
| 187375010 | LIBRIUM          | Hydrochloride      |
|           |                  | Chlordiazepoxide   |
| 187375110 | LIBRIUM          | Hydrochloride      |
|           |                  | Chlordiazepoxide   |
| 187375574 | LIBRIUM          | Hydrochloride      |
|           |                  | Chlordiazepoxide   |
| 187375810 | LIBRIUM          | Hydrochloride      |
|           |                  | Flurazepam         |
| 187405110 | DALMANE          | Hydrochloride      |
|           |                  | Flurazepam         |
| 187405210 | DALMANE          | Hydrochloride      |
| 205281004 | DIAZEPAM         | Diazepam           |
| 205281046 | DIAZEPAM         | Diazepam           |
| 205281056 | DIAZEPAM         | Diazepam           |
| 205281095 | DIAZEPAM         | Diazepam           |
| 209457820 | LORAZEPAM        | Lorazepam          |

|           |                  |                  |
|-----------|------------------|------------------|
| 209458120 | LORAZEPAM        | Lorazepam        |
| 209458220 | LORAZEPAM        | Lorazepam        |
| 209458320 | LORAZEPAM        | Lorazepam        |
| 217680508 | D-VAL            | Diazepam         |
|           | CHLORDIAZEPOXIDE | Chlordiazepoxide |
| 223029400 | HCL              | Hydrochloride    |
|           | CHLORDIAZEPOXIDE | Chlordiazepoxide |
| 223029401 | HCL              | Hydrochloride    |
|           | CHLORDIAZEPOXIDE | Chlordiazepoxide |
| 223029402 | HCL              | Hydrochloride    |
|           | CHLORDIAZEPOXIDE | Chlordiazepoxide |
| 223029500 | HCL              | Hydrochloride    |
|           | CHLORDIAZEPOXIDE | Chlordiazepoxide |
| 223029501 | HCL              | Hydrochloride    |
|           | CHLORDIAZEPOXIDE | Chlordiazepoxide |
| 223029502 | HCL              | Hydrochloride    |
|           | CHLORDIAZEPOXIDE | Chlordiazepoxide |
| 223029600 | HCL              | Hydrochloride    |
|           | CHLORDIAZEPOXIDE | Chlordiazepoxide |
| 223029601 | HCL              | Hydrochloride    |
|           | CHLORDIAZEPOXIDE | Chlordiazepoxide |
| 223029602 | HCL              | Hydrochloride    |
| 223080101 | DIAZEPAM         | Diazepam         |
| 223080102 | DIAZEPAM         | Diazepam         |
| 223080105 | DIAZEPAM         | Diazepam         |
| 223080201 | DIAZEPAM         | Diazepam         |
| 223080202 | DIAZEPAM         | Diazepam         |
| 223080205 | DIAZEPAM         | Diazepam         |
| 223080301 | DIAZEPAM         | Diazepam         |
| 223080302 | DIAZEPAM         | Diazepam         |
| 223080305 | DIAZEPAM         | Diazepam         |
| 223111201 | LORAZEPAM        | Lorazepam        |
| 223111205 | LORAZEPAM        | Lorazepam        |
| 223111301 | LORAZEPAM        | Lorazepam        |
| 223111302 | LORAZEPAM        | Lorazepam        |
| 223111305 | LORAZEPAM        | Lorazepam        |
| 223111401 | LORAZEPAM        | Lorazepam        |
| 223111402 | LORAZEPAM        | Lorazepam        |
| 223111405 | LORAZEPAM        | Lorazepam        |
| 223139401 | OXAZEPAM         | Oxazepam         |
| 223139405 | OXAZEPAM         | Oxazepam         |
| 223139501 | OXAZEPAM         | Oxazepam         |
| 223139505 | OXAZEPAM         | Oxazepam         |
| 223139601 | OXAZEPAM         | Oxazepam         |
| 223139605 | OXAZEPAM         | Oxazepam         |

|           |                  |                  |
|-----------|------------------|------------------|
| 223166001 | TEMAZEPAM        | Temazepam        |
| 223166005 | TEMAZEPAM        | Temazepam        |
| 223166101 | TEMAZEPAM        | Temazepam        |
| 223166105 | TEMAZEPAM        | Temazepam        |
| 223742505 | DIAZEPAM         | Diazepam         |
| 223742625 | DIAZEPAM         | Diazepam         |
| 223742725 | DIAZEPAM         | Diazepam         |
| 223742810 | DIAZEPAM         | Diazepam         |
| 223742825 | DIAZEPAM         | Diazepam         |
| 223742910 | DIAZEPAM         | Diazepam         |
|           |                  | Flurazepam       |
| 228202110 | FLURAZEPAM HCL   | Hydrochloride    |
|           |                  | Flurazepam       |
| 228202150 | FLURAZEPAM HCL   | Hydrochloride    |
|           |                  | Flurazepam       |
| 228202210 | FLURAZEPAM HCL   | Hydrochloride    |
|           |                  | Flurazepam       |
| 228202250 | FLURAZEPAM HCL   | Hydrochloride    |
| 228202710 | ALPRAZOLAM       | Alprazolam       |
| 228202750 | ALPRAZOLAM       | Alprazolam       |
| 228202796 | ALPRAZOLAM       | Alprazolam       |
| 228202910 | ALPRAZOLAM       | Alprazolam       |
| 228202950 | ALPRAZOLAM       | Alprazolam       |
| 228202996 | ALPRAZOLAM       | Alprazolam       |
| 228203110 | ALPRAZOLAM       | Alprazolam       |
| 228203150 | ALPRAZOLAM       | Alprazolam       |
| 228203196 | ALPRAZOLAM       | Alprazolam       |
| 228203910 | ALPRAZOLAM       | Alprazolam       |
| 228203950 | ALPRAZOLAM       | Alprazolam       |
| 228205110 | DIAZEPAM         | Diazepam         |
| 228205150 | DIAZEPAM         | Diazepam         |
| 228205196 | DIAZEPAM         | Diazepam         |
| 228205210 | DIAZEPAM         | Diazepam         |
| 228205250 | DIAZEPAM         | Diazepam         |
| 228205296 | DIAZEPAM         | Diazepam         |
| 228205310 | DIAZEPAM         | Diazepam         |
| 228205350 | DIAZEPAM         | Diazepam         |
| 228205396 | DIAZEPAM         | Diazepam         |
| 228205710 | LORAZEPAM        | Lorazepam        |
| 228205750 | LORAZEPAM        | Lorazepam        |
| 228205910 | LORAZEPAM        | Lorazepam        |
| 228205950 | LORAZEPAM        | Lorazepam        |
| 228205996 | LORAZEPAM        | Lorazepam        |
| 228206050 | CHLORDIAZEPOXIDE | Chlordiazepoxide |

|           |                  |                  |
|-----------|------------------|------------------|
|           | HCL              | Hydrochloride    |
|           | CHLORDIAZEPOXIDE | Chlordiazepoxide |
| 228206110 | HCL              | Hydrochloride    |
|           | CHLORDIAZEPOXIDE | Chlordiazepoxide |
| 228206150 | HCL              | Hydrochloride    |
| 228206310 | LORAZEPAM        | Lorazepam        |
| 228206350 | LORAZEPAM        | Lorazepam        |
| 228206396 | LORAZEPAM        | Lorazepam        |
|           | CHLORDIAZEPOXIDE | Chlordiazepoxide |
| 228206410 | HCL              | Hydrochloride    |
|           | CHLORDIAZEPOXIDE | Chlordiazepoxide |
| 228206450 | HCL              | Hydrochloride    |
| 228206710 | OXAZEPAM         | Oxazepam         |
| 228206750 | OXAZEPAM         | Oxazepam         |
| 228206910 | OXAZEPAM         | Oxazepam         |
| 228206950 | OXAZEPAM         | Oxazepam         |
| 228207310 | OXAZEPAM         | Oxazepam         |
| 228207350 | OXAZEPAM         | Oxazepam         |
| 228207610 | TEMAZEPAM        | Temazepam        |
| 228207650 | TEMAZEPAM        | Temazepam        |
| 228207710 | TEMAZEPAM        | Temazepam        |
| 228207750 | TEMAZEPAM        | Temazepam        |
|           | CLORAZEPATE      | Clorazepate      |
| 228207810 | DIPOTASSIUM      | Dipotassium      |
|           | CLORAZEPATE      | Clorazepate      |
| 228207850 | DIPOTASSIUM      | Dipotassium      |
|           | CLORAZEPATE      | Clorazepate      |
| 228208110 | DIPOTASSIUM      | Dipotassium      |
|           | CLORAZEPATE      | Clorazepate      |
| 228208150 | DIPOTASSIUM      | Dipotassium      |
|           | CLORAZEPATE      | Clorazepate      |
| 228208310 | DIPOTASSIUM      | Dipotassium      |
|           | CLORAZEPATE      | Clorazepate      |
| 228306711 | DIPOTASSIUM      | Dipotassium      |
|           | CLORAZEPATE      | Clorazepate      |
| 228306750 | DIPOTASSIUM      | Dipotassium      |
|           | CLORAZEPATE      | Clorazepate      |
| 228306811 | DIPOTASSIUM      | Dipotassium      |
|           | CLORAZEPATE      | Clorazepate      |
| 228306850 | DIPOTASSIUM      | Dipotassium      |
|           | CLORAZEPATE      | Clorazepate      |
| 228306911 | DIPOTASSIUM      | Dipotassium      |
| 228308306 | ALPRAZOLAM       | Alprazolam       |
| 228308406 | ALPRAZOLAM       | Alprazolam       |
| 228308606 | ALPRAZOLAM       | Alprazolam       |
| 228308706 | ALPRAZOLAM       | Alprazolam       |

|           |                  |                  |
|-----------|------------------|------------------|
| 228401911 | ALPRAZOLAM       | Alprazolam       |
| 228402211 | ALPRAZOLAM       | Alprazolam       |
| 228402411 | ALPRAZOLAM       | Alprazolam       |
| 228402511 | ALPRAZOLAM       | Alprazolam       |
|           | CHLORDIAZEPOXIDE | Chlordiazepoxide |
| 298203505 | HCL              | Hydrochloride    |
|           | CHLORDIAZEPOXIDE | Chlordiazepoxide |
| 302062001 | HCL              | Hydrochloride    |
|           | CHLORDIAZEPOXIDE | Chlordiazepoxide |
| 302062005 | HCL              | Hydrochloride    |
|           | CHLORDIAZEPOXIDE | Chlordiazepoxide |
| 302062101 | HCL              | Hydrochloride    |
|           | CHLORDIAZEPOXIDE | Chlordiazepoxide |
| 302062105 | HCL              | Hydrochloride    |
|           | CHLORDIAZEPOXIDE | Chlordiazepoxide |
| 302062110 | HCL              | Hydrochloride    |
|           | CHLORDIAZEPOXIDE | Chlordiazepoxide |
| 302062201 | HCL              | Hydrochloride    |
|           | CHLORDIAZEPOXIDE | Chlordiazepoxide |
| 302062205 | HCL              | Hydrochloride    |
|           | CHLORDIAZEPOXIDE | Chlordiazepoxide |
| 302062210 | HCL              | Hydrochloride    |
|           | CLORAZEPATE      | Clorazepate      |
| 302110501 | DIPOTASSIUM      | Dipotassium      |
|           | CLORAZEPATE      | Clorazepate      |
| 302110601 | DIPOTASSIUM      | Dipotassium      |
| 302150001 | DIAZEPAM         | Diazepam         |
| 302150005 | DIAZEPAM         | Diazepam         |
| 302150010 | DIAZEPAM         | Diazepam         |
| 302150101 | DIAZEPAM         | Diazepam         |
| 302150105 | DIAZEPAM         | Diazepam         |
| 302150110 | DIAZEPAM         | Diazepam         |
| 302150201 | DIAZEPAM         | Diazepam         |
| 302150205 | DIAZEPAM         | Diazepam         |
| 302150210 | DIAZEPAM         | Diazepam         |
|           |                  | Flurazepam       |
| 302302101 | FLURAZEPAM HCL   | Hydrochloride    |
|           |                  | Flurazepam       |
| 302302105 | FLURAZEPAM HCL   | Hydrochloride    |
|           |                  | Flurazepam       |
| 302302201 | FLURAZEPAM HCL   | Hydrochloride    |
|           |                  | Flurazepam       |
| 302302205 | FLURAZEPAM HCL   | Hydrochloride    |
| 302388001 | LORAZEPAM        | Lorazepam        |
| 302388005 | LORAZEPAM        | Lorazepam        |
| 302388101 | LORAZEPAM        | Lorazepam        |

|           |                  |                  |
|-----------|------------------|------------------|
| 302388105 | LORAZEPAM        | Lorazepam        |
| 302388201 | LORAZEPAM        | Lorazepam        |
| 302388205 | LORAZEPAM        | Lorazepam        |
| 302691001 | TEMAZEPAM        | Temazepam        |
| 302691005 | TEMAZEPAM        | Temazepam        |
| 302691101 | TEMAZEPAM        | Temazepam        |
| 302691105 | TEMAZEPAM        | Temazepam        |
|           | CHLORDIAZEPOXIDE | Chlordiazepoxide |
| 304006705 | HCL              | Hydrochloride    |
|           | CHLORDIAZEPOXIDE | Chlordiazepoxide |
| 304006800 | HCL              | Hydrochloride    |
|           | CHLORDIAZEPOXIDE | Chlordiazepoxide |
| 304006805 | HCL              | Hydrochloride    |
|           | CHLORDIAZEPOXIDE | Chlordiazepoxide |
| 304006901 | HCL              | Hydrochloride    |
|           | CHLORDIAZEPOXIDE | Chlordiazepoxide |
| 304006905 | HCL              | Hydrochloride    |
| 304154301 | LORAZEPAM        | Lorazepam        |
| 304154305 | LORAZEPAM        | Lorazepam        |
| 304154311 | LORAZEPAM        | Lorazepam        |
| 304154401 | LORAZEPAM        | Lorazepam        |
| 304154405 | LORAZEPAM        | Lorazepam        |
| 304154411 | LORAZEPAM        | Lorazepam        |
| 304154501 | LORAZEPAM        | Lorazepam        |
| 304154505 | LORAZEPAM        | Lorazepam        |
| 304154511 | LORAZEPAM        | Lorazepam        |
| 304154600 | DIAZEPAM         | Diazepam         |
| 304154601 | DIAZEPAM         | Diazepam         |
| 304154605 | DIAZEPAM         | Diazepam         |
| 304154700 | DIAZEPAM         | Diazepam         |
| 304154701 | DIAZEPAM         | Diazepam         |
| 304154705 | DIAZEPAM         | Diazepam         |
| 304154800 | DIAZEPAM         | Diazepam         |
| 304154805 | DIAZEPAM         | Diazepam         |
| 304157301 | TEMAZEPAM        | Temazepam        |
| 304157305 | TEMAZEPAM        | Temazepam        |
| 304157401 | TEMAZEPAM        | Temazepam        |
| 304157405 | TEMAZEPAM        | Temazepam        |
| 304157701 | DIAZEPAM         | Diazepam         |
| 304157705 | DIAZEPAM         | Diazepam         |
| 304157801 | DIAZEPAM         | Diazepam         |
| 304157805 | DIAZEPAM         | Diazepam         |
| 304157901 | DIAZEPAM         | Diazepam         |
| 304158501 | FLURAZEPAM HCL   | Flurazepam       |

|           |                  |                  |
|-----------|------------------|------------------|
|           |                  | Hydrochloride    |
|           |                  | Flurazepam       |
| 304158505 | FLURAZEPAM HCL   | Hydrochloride    |
|           |                  | Flurazepam       |
| 304158601 | FLURAZEPAM HCL   | Hydrochloride    |
|           |                  | Flurazepam       |
| 304158605 | FLURAZEPAM HCL   | Hydrochloride    |
|           | CLORAZEPATE      | Clorazepate      |
| 304183401 | DIPOTASSIUM      | Dipotassium      |
|           | CLORAZEPATE      | Clorazepate      |
| 304183405 | DIPOTASSIUM      | Dipotassium      |
|           | CLORAZEPATE      | Clorazepate      |
| 304183501 | DIPOTASSIUM      | Dipotassium      |
|           | CLORAZEPATE      | Clorazepate      |
| 304183505 | DIPOTASSIUM      | Dipotassium      |
|           | CLORAZEPATE      | Clorazepate      |
| 304183601 | DIPOTASSIUM      | Dipotassium      |
| 304184401 | OXAZEPAM         | Oxazepam         |
| 304187401 | OXAZEPAM         | Oxazepam         |
| 304187501 | OXAZEPAM         | Oxazepam         |
| 304187601 | OXAZEPAM         | Oxazepam         |
|           | CLORAZEPATE      | Clorazepate      |
| 339400112 | DIPOTASSIUM      | Dipotassium      |
|           | CLORAZEPATE      | Clorazepate      |
| 339400312 | DIPOTASSIUM      | Dipotassium      |
|           | CLORAZEPATE      | Clorazepate      |
| 339400512 | DIPOTASSIUM      | Dipotassium      |
| 339400712 | DIAZEPAM         | Diazepam         |
| 339400912 | DIAZEPAM         | Diazepam         |
| 339401112 | DIAZEPAM         | Diazepam         |
|           |                  | Flurazepam       |
| 339401312 | FLURAZEPAM HCL   | Hydrochloride    |
|           |                  | Flurazepam       |
| 339401512 | FLURAZEPAM HCL   | Hydrochloride    |
| 339401712 | LORAZEPAM        | Lorazepam        |
| 339401912 | LORAZEPAM        | Lorazepam        |
| 339402112 | LORAZEPAM        | Lorazepam        |
| 339402312 | OXAZEPAM         | Oxazepam         |
| 339402512 | OXAZEPAM         | Oxazepam         |
| 339402712 | OXAZEPAM         | Oxazepam         |
| 339403312 | TEMAZEPAM        | Temazepam        |
| 339403512 | TEMAZEPAM        | Temazepam        |
|           | CHLORDIAZEPOXIDE | Chlordiazepoxide |
| 349203201 | HCL              | Hydrochloride    |
|           | CHLORDIAZEPOXIDE | Chlordiazepoxide |
| 349203205 | HCL              | Hydrochloride    |

|           |                           |                                   |
|-----------|---------------------------|-----------------------------------|
| 349203301 | CHLORDIAZEPOXIDE<br>HCL   | Chlordiazepoxide<br>Hydrochloride |
| 349203305 | CHLORDIAZEPOXIDE<br>HCL   | Chlordiazepoxide<br>Hydrochloride |
| 349203310 | CHLORDIAZEPOXIDE<br>HCL   | Chlordiazepoxide<br>Hydrochloride |
| 349203401 | CHLORDIAZEPOXIDE<br>HCL   | Chlordiazepoxide<br>Hydrochloride |
| 349203405 | CHLORDIAZEPOXIDE<br>HCL   | Chlordiazepoxide<br>Hydrochloride |
| 349844801 | DIAZEPAM                  | Diazepam                          |
| 349844805 | DIAZEPAM                  | Diazepam                          |
| 349844810 | DIAZEPAM                  | Diazepam                          |
| 349844852 | DIAZEPAM                  | Diazepam                          |
| 349844901 | DIAZEPAM                  | Diazepam                          |
| 349844905 | DIAZEPAM                  | Diazepam                          |
| 349844910 | DIAZEPAM                  | Diazepam                          |
| 349844952 | DIAZEPAM                  | Diazepam                          |
| 349845001 | DIAZEPAM                  | Diazepam                          |
| 349845005 | DIAZEPAM                  | Diazepam                          |
| 349845010 | DIAZEPAM                  | Diazepam                          |
| 349845052 | DIAZEPAM                  | Diazepam                          |
| 349846101 | LORAZEPAM                 | Lorazepam                         |
| 349846105 | LORAZEPAM                 | Lorazepam                         |
| 349846201 | LORAZEPAM                 | Lorazepam                         |
| 349846205 | LORAZEPAM                 | Lorazepam                         |
| 349846210 | LORAZEPAM                 | Lorazepam                         |
| 349846301 | LORAZEPAM                 | Lorazepam                         |
| 349846305 | LORAZEPAM                 | Lorazepam                         |
| 349846501 | FLURAZEPAM HCL            | Flurazepam<br>Hydrochloride       |
| 349846505 | FLURAZEPAM HCL            | Flurazepam<br>Hydrochloride       |
| 349846601 | FLURAZEPAM HCL            | Flurazepam<br>Hydrochloride       |
| 349846605 | FLURAZEPAM HCL            | Flurazepam<br>Hydrochloride       |
| 349848701 | TEMAZEPAM                 | Temazepam                         |
| 349848705 | TEMAZEPAM                 | Temazepam                         |
| 349848801 | TEMAZEPAM                 | Temazepam                         |
| 349848805 | TEMAZEPAM                 | Temazepam                         |
| 349872001 | CLOAZEPATE<br>DIPOTASSIUM | Clorazepate<br>Dipotassium        |
| 349874605 | OXAZEPAM                  | Oxazepam                          |
| 349874701 | OXAZEPAM                  | Oxazepam                          |

|           |                  |                  |
|-----------|------------------|------------------|
| 349874805 | OXAZEPAM         | Oxazepam         |
|           | CLORAZEPATE      | Clorazepate      |
| 349886205 | DIPOTASSIUM      | Dipotassium      |
|           | CLORAZEPATE      | Clorazepate      |
| 349886305 | DIPOTASSIUM      | Dipotassium      |
| 349886501 | OXAZEPAM         | Oxazepam         |
| 349886601 | OXAZEPAM         | Oxazepam         |
| 349886605 | OXAZEPAM         | Oxazepam         |
| 349886701 | OXAZEPAM         | Oxazepam         |
| 349892701 | TEMAZEPAM        | Temazepam        |
| 349892705 | TEMAZEPAM        | Temazepam        |
|           | CLORAZEPATE      | Clorazepate      |
| 349896001 | DIPOTASSIUM      | Dipotassium      |
|           | CLORAZEPATE      | Clorazepate      |
| 349896005 | DIPOTASSIUM      | Dipotassium      |
|           | CLORAZEPATE      | Clorazepate      |
| 349896101 | DIPOTASSIUM      | Dipotassium      |
|           | CLORAZEPATE      | Clorazepate      |
| 349896105 | DIPOTASSIUM      | Dipotassium      |
|           | CLORAZEPATE      | Clorazepate      |
| 349896201 | DIPOTASSIUM      | Dipotassium      |
|           | CLORAZEPATE      | Clorazepate      |
| 349898401 | DIPOTASSIUM      | Dipotassium      |
|           | CLORAZEPATE      | Clorazepate      |
| 349898501 | DIPOTASSIUM      | Dipotassium      |
|           | CLORAZEPATE      | Clorazepate      |
| 349898601 | DIPOTASSIUM      | Dipotassium      |
|           | CHLORDIAZEPOXIDE | Chlordiazepoxide |
| 359013640 | HCL              | Hydrochloride    |
|           | CHLORDIAZEPOXIDE | Chlordiazepoxide |
| 359013650 | HCL              | Hydrochloride    |
|           | CHLORDIAZEPOXIDE | Chlordiazepoxide |
| 359013740 | HCL              | Hydrochloride    |
|           | CHLORDIAZEPOXIDE | Chlordiazepoxide |
| 359013750 | HCL              | Hydrochloride    |
|           | CHLORDIAZEPOXIDE | Chlordiazepoxide |
| 359013810 | HCL              | Hydrochloride    |
|           | CHLORDIAZEPOXIDE | Chlordiazepoxide |
| 359013840 | HCL              | Hydrochloride    |
|           | CHLORDIAZEPOXIDE | Chlordiazepoxide |
| 359013850 | HCL              | Hydrochloride    |
|           | CHLORDIAZEPOXIDE | Chlordiazepoxide |
| 364043601 | HCL              | Hydrochloride    |
|           | CHLORDIAZEPOXIDE | Chlordiazepoxide |
| 364043602 | HCL              | Hydrochloride    |
|           | CHLORDIAZEPOXIDE | Chlordiazepoxide |
| 364043605 | HCL              | Hydrochloride    |

|           |                         |                                   |
|-----------|-------------------------|-----------------------------------|
| 364043701 | CHLORDIAZEPOXIDE<br>HCL | Chlordiazepoxide<br>Hydrochloride |
| 364043702 | CHLORDIAZEPOXIDE<br>HCL | Chlordiazepoxide<br>Hydrochloride |
| 364043705 | CHLORDIAZEPOXIDE<br>HCL | Chlordiazepoxide<br>Hydrochloride |
| 364043801 | CHLORDIAZEPOXIDE<br>HCL | Chlordiazepoxide<br>Hydrochloride |
| 364043805 | CHLORDIAZEPOXIDE<br>HCL | Chlordiazepoxide<br>Hydrochloride |
| 364077401 | DIAZEPAM                | Diazepam                          |
| 364077402 | DIAZEPAM                | Diazepam                          |
| 364077405 | DIAZEPAM                | Diazepam                          |
| 364077501 | DIAZEPAM                | Diazepam                          |
| 364077502 | DIAZEPAM                | Diazepam                          |
| 364077505 | DIAZEPAM                | Diazepam                          |
| 364077601 | DIAZEPAM                | Diazepam                          |
| 364077602 | DIAZEPAM                | Diazepam                          |
| 364077605 | DIAZEPAM                | Diazepam                          |
| 364079301 | LORAZEPAM               | Lorazepam                         |
| 364079302 | LORAZEPAM               | Lorazepam                         |
| 364079305 | LORAZEPAM               | Lorazepam                         |
| 364079401 | LORAZEPAM               | Lorazepam                         |
| 364079405 | LORAZEPAM               | Lorazepam                         |
| 364079501 | LORAZEPAM               | Lorazepam                         |
| 364079505 | LORAZEPAM               | Lorazepam                         |
| 364080101 | FLURAZEPAM HCL          | Flurazepam<br>Hydrochloride       |
| 364080105 | FLURAZEPAM HCL          | Flurazepam<br>Hydrochloride       |
| 364080201 | FLURAZEPAM HCL          | Flurazepam<br>Hydrochloride       |
| 364080205 | FLURAZEPAM HCL          | Flurazepam<br>Hydrochloride       |
| 364081501 | TEMAZEPAM               | Temazepam                         |
| 364081505 | TEMAZEPAM               | Temazepam                         |
| 364081601 | TEMAZEPAM               | Temazepam                         |
| 364081605 | TEMAZEPAM               | Temazepam                         |
| 364082546 | DIAZEPAM                | Diazepam                          |
| 364082548 | DIAZEPAM                | Diazepam                          |
| 364082554 | DIAZEPAM                | Diazepam                          |
| 364082588 | DIAZEPAM                | Diazepam                          |
| 364082652 | DIAZEPAM                | Diazepam                          |
| 364215201 | OXAZEPAM                | Oxazepam                          |
| 364215301 | OXAZEPAM                | Oxazepam                          |

|           |                |               |
|-----------|----------------|---------------|
| 364215401 | OXAZEPAM       | Oxazepam      |
|           | CLORAZEPATE    | Clorazepate   |
| 364220101 | DIPOTASSIUM    | Dipotassium   |
|           | CLORAZEPATE    | Clorazepate   |
| 364220105 | DIPOTASSIUM    | Dipotassium   |
|           | CLORAZEPATE    | Clorazepate   |
| 364220201 | DIPOTASSIUM    | Dipotassium   |
|           | CLORAZEPATE    | Clorazepate   |
| 364220205 | DIPOTASSIUM    | Dipotassium   |
|           | CLORAZEPATE    | Clorazepate   |
| 364220301 | DIPOTASSIUM    | Dipotassium   |
| 364258201 | ALPRAZOLAM     | Alprazolam    |
| 364258205 | ALPRAZOLAM     | Alprazolam    |
| 364258301 | ALPRAZOLAM     | Alprazolam    |
| 364258305 | ALPRAZOLAM     | Alprazolam    |
| 364258401 | ALPRAZOLAM     | Alprazolam    |
| 364258405 | ALPRAZOLAM     | Alprazolam    |
| 364259833 | TRIAZOLAM      | Triazolam     |
| 364259905 | TRIAZOLAM      | Triazolam     |
| 364259933 | TRIAZOLAM      | Triazolam     |
|           |                | Midazolam     |
| 364291347 | MIDAZOLAM HCL  | Hydrochloride |
|           |                | Midazolam     |
| 364291431 | MIDAZOLAM HCL  | Hydrochloride |
|           |                | Midazolam     |
| 364291533 | MIDAZOLAM HCL  | Hydrochloride |
|           |                | Midazolam     |
| 364291645 | MIDAZOLAM HCL  | Hydrochloride |
|           |                | Midazolam     |
| 364291747 | MIDAZOLAM HCL  | Hydrochloride |
|           |                | Midazolam     |
| 364291831 | MIDAZOLAM HCL  | Hydrochloride |
|           |                | Midazolam     |
| 364291933 | MIDAZOLAM HCL  | Hydrochloride |
|           |                | Midazolam     |
| 364292889 | MIDAZOLAM HCL  | Hydrochloride |
| 364304854 | LORAZEPAM      | Lorazepam     |
| 364304951 | LORAZEPAM      | Lorazepam     |
| 364304954 | LORAZEPAM      | Lorazepam     |
|           |                | Flurazepam    |
| 367202110 | FLURAZEPAM HCL | Hydrochloride |
|           |                | Flurazepam    |
| 367202150 | FLURAZEPAM HCL | Hydrochloride |
|           |                | Flurazepam    |
| 367202210 | FLURAZEPAM HCL | Hydrochloride |
| 367202250 | FLURAZEPAM HCL | Flurazepam    |

|           |                                 |                                     |
|-----------|---------------------------------|-------------------------------------|
|           |                                 | Hydrochloride                       |
| 367205110 | DIAZEPAM                        | Diazepam                            |
| 367205150 | DIAZEPAM                        | Diazepam                            |
| 367205196 | DIAZEPAM                        | Diazepam                            |
| 367205210 | DIAZEPAM                        | Diazepam                            |
| 367205250 | DIAZEPAM                        | Diazepam                            |
| 367205296 | DIAZEPAM                        | Diazepam                            |
| 367205310 | DIAZEPAM                        | Diazepam                            |
| 367205350 | DIAZEPAM                        | Diazepam                            |
| 367205396 | DIAZEPAM                        | Diazepam                            |
| 367205710 | LORAZEPAM                       | Lorazepam                           |
| 367205750 | LORAZEPAM                       | Lorazepam                           |
| 367205910 | LORAZEPAM                       | Lorazepam                           |
| 367205950 | LORAZEPAM                       | Lorazepam                           |
| 367206310 | LORAZEPAM                       | Lorazepam                           |
| 367206350 | LORAZEPAM                       | Lorazepam                           |
| 367206396 | LORAZEPAM                       | Lorazepam                           |
| 367206710 | OXAZEPAM                        | Oxazepam                            |
| 367206750 | OXAZEPAM                        | Oxazepam                            |
| 367206910 | OXAZEPAM                        | Oxazepam                            |
| 367206950 | OXAZEPAM                        | Oxazepam                            |
| 367207310 | OXAZEPAM                        | Oxazepam                            |
| 367207350 | OXAZEPAM                        | Oxazepam                            |
| 367207610 | TEMAZEPAM                       | Temazepam                           |
| 367207650 | TEMAZEPAM                       | Temazepam                           |
| 367207710 | TEMAZEPAM                       | Temazepam                           |
| 367207750 | TEMAZEPAM                       | Temazepam                           |
|           | CLORAZEPATE                     | Clorazepate                         |
| 367207810 | DIPOTASSIUM<br>CLORAZEPATE      | Dipotassium<br>Clorazepate          |
| 367208110 | DIPOTASSIUM<br>CLORAZEPATE      | Dipotassium<br>Clorazepate          |
| 367208150 | DIPOTASSIUM<br>CLORAZEPATE      | Dipotassium<br>Clorazepate          |
| 367208310 | DIPOTASSIUM<br>CHLORDIAZEPOXIDE | Dipotassium                         |
| 368300701 | HCL<br>CHLORDIAZEPOXIDE         | Inactive Record<br>Chlordiazepoxide |
| 368300750 | HCL<br>CHLORDIAZEPOXIDE         | Hydrochloride<br>Chlordiazepoxide   |
| 368303101 | HCL<br>CHLORDIAZEPOXIDE         | Hydrochloride<br>Chlordiazepoxide   |
| 368303150 | HCL<br>CHLORDIAZEPOXIDE         | Hydrochloride<br>Chlordiazepoxide   |
| 368303201 | HCL                             | Hydrochloride                       |

|           |                  |                  |
|-----------|------------------|------------------|
|           | CHLORDIAZEPOXIDE | Chlordiazepoxide |
| 368303250 | HCL              | Hydrochloride    |
|           | CLORAZEPATE      | Clorazepate      |
| 378003001 | DIPOTASSIUM      | Dipotassium      |
|           | CLORAZEPATE      | Clorazepate      |
| 378003005 | DIPOTASSIUM      | Dipotassium      |
|           | CLORAZEPATE      | Clorazepate      |
| 378004001 | DIPOTASSIUM      | Dipotassium      |
|           | CLORAZEPATE      | Clorazepate      |
| 378004005 | DIPOTASSIUM      | Dipotassium      |
|           | CLORAZEPATE      | Clorazepate      |
| 378007001 | DIPOTASSIUM      | Dipotassium      |
| 378027101 | DIAZEPAM         | Diazepam         |
| 378027105 | DIAZEPAM         | Diazepam         |
| 378027110 | DIAZEPAM         | Diazepam         |
| 378032101 | LORAZEPAM        | Lorazepam        |
| 378032105 | LORAZEPAM        | Lorazepam        |
| 378034501 | DIAZEPAM         | Diazepam         |
| 378034505 | DIAZEPAM         | Diazepam         |
| 378034510 | DIAZEPAM         | Diazepam         |
| 378045701 | LORAZEPAM        | Lorazepam        |
| 378045705 | LORAZEPAM        | Lorazepam        |
| 378045710 | LORAZEPAM        | Lorazepam        |
| 378047701 | DIAZEPAM         | Diazepam         |
| 378047705 | DIAZEPAM         | Diazepam         |
| 378077701 | LORAZEPAM        | Lorazepam        |
| 378077705 | LORAZEPAM        | Lorazepam        |
| 378077710 | LORAZEPAM        | Lorazepam        |
| 378232101 | LORAZEPAM        | Lorazepam        |
| 378232105 | LORAZEPAM        | Lorazepam        |
| 378245701 | LORAZEPAM        | Lorazepam        |
| 378245710 | LORAZEPAM        | Lorazepam        |
| 378277701 | LORAZEPAM        | Lorazepam        |
| 378277705 | LORAZEPAM        | Lorazepam        |
| 378311001 | TEMAZEPAM        | Temazepam        |
| 378312093 | TEMAZEPAM        | Temazepam        |
| 378400101 | ALPRAZOLAM       | Alprazolam       |
| 378400105 | ALPRAZOLAM       | Alprazolam       |
| 378400177 | ALPRAZOLAM       | Alprazolam       |
| 378400301 | ALPRAZOLAM       | Alprazolam       |
| 378400305 | ALPRAZOLAM       | Alprazolam       |
| 378400377 | ALPRAZOLAM       | Alprazolam       |
| 378400501 | ALPRAZOLAM       | Alprazolam       |
| 378400505 | ALPRAZOLAM       | Alprazolam       |

|           |                |                             |
|-----------|----------------|-----------------------------|
| 378400577 | ALPRAZOLAM     | Alprazolam                  |
| 378400701 | ALPRAZOLAM     | Alprazolam                  |
| 378401001 | TEMAZEPAM      | Temazepam                   |
| 378401005 | TEMAZEPAM      | Temazepam                   |
| 378401077 | TEMAZEPAM      | Temazepam                   |
| 378441501 | FLURAZEPAM HCL | Flurazepam<br>Hydrochloride |
| 378441505 | FLURAZEPAM HCL | Flurazepam<br>Hydrochloride |
| 378443001 | FLURAZEPAM HCL | Flurazepam<br>Hydrochloride |
| 378443005 | FLURAZEPAM HCL | Flurazepam<br>Hydrochloride |
| 378502191 | ALPRAZOLAM     | Alprazolam                  |
| 378502291 | ALPRAZOLAM     | Alprazolam                  |
| 378502391 | ALPRAZOLAM     | Alprazolam                  |
| 378502491 | ALPRAZOLAM     | Alprazolam                  |
| 378505001 | TEMAZEPAM      | Temazepam                   |
| 378505005 | TEMAZEPAM      | Temazepam                   |
| 378505077 | TEMAZEPAM      | Temazepam                   |
| 402044501 | DIAZEPAM       | Diazepam                    |
| 402044502 | DIAZEPAM       | Diazepam                    |
| 402044510 | DIAZEPAM       | Diazepam                    |
| 402101301 | LORAZEPAM      | Lorazepam                   |
| 402101310 | LORAZEPAM      | Lorazepam                   |
| 402101401 | LORAZEPAM      | Lorazepam                   |
| 402101410 | LORAZEPAM      | Lorazepam                   |
| 403001030 | LORAZEPAM      | Lorazepam                   |
| 403001205 | LORAZEPAM      | Lorazepam                   |
| 403001222 | LORAZEPAM      | Lorazepam                   |
| 403001230 | LORAZEPAM      | Lorazepam                   |
| 403001830 | FLURAZEPAM HCL | Flurazepam<br>Hydrochloride |
| 403002001 | FLURAZEPAM HCL | Flurazepam<br>Hydrochloride |
| 403002030 | FLURAZEPAM HCL | Flurazepam<br>Hydrochloride |
| 403057471 | ALPRAZOLAM     | Alprazolam                  |
| 403098701 | HALCION        | Triazolam                   |
| 403098720 | HALCION        | Triazolam                   |
| 403098930 | HALCION        | Triazolam                   |
| 403221618 | DIAZEPAM       | Diazepam                    |
| 403221818 | DIAZEPAM       | Diazepam                    |
| 403221901 | VALIUM         | Diazepam                    |

|           |                  |                  |
|-----------|------------------|------------------|
| 403222001 | DIAZEPAM         | Diazepam         |
| 403222030 | DIAZEPAM         | Diazepam         |
| 403222060 | DIAZEPAM         | Diazepam         |
| 403222214 | DIAZEPAM         | Diazepam         |
| 403222230 | DIAZEPAM         | Diazepam         |
| 403222403 | DIAZEPAM         | Diazepam         |
| 403222406 | DIAZEPAM         | Diazepam         |
| 403222410 | DIAZEPAM         | Diazepam         |
| 403222430 | DIAZEPAM         | Diazepam         |
|           |                  | Midazolam        |
| 403225918 | VERSED           | Hydrochloride    |
| 403232120 | XANAX            | Alprazolam       |
| 403232130 | XANAX            | Alprazolam       |
| 403232150 | XANAX            | Alprazolam       |
| 403232304 | XANAX            | Alprazolam       |
| 403232320 | XANAX            | Alprazolam       |
| 403232330 | XANAX            | Alprazolam       |
| 403232401 | ALPRAZOLAM       | Alprazolam       |
| 403232404 | ALPRAZOLAM       | Alprazolam       |
| 403232430 | ALPRAZOLAM       | Alprazolam       |
| 403232445 | ALPRAZOLAM       | Alprazolam       |
| 403232471 | ALPRAZOLAM       | Alprazolam       |
| 403232474 | ALPRAZOLAM       | Alprazolam       |
| 403384315 | PROSOM           | Estazolam        |
| 403401318 | ATIVAN           | Lorazepam        |
| 403444015 | ALPRAZOLAM       | Alprazolam       |
| 403444030 | ALPRAZOLAM       | Alprazolam       |
| 403457830 | ALPRAZOLAM       | Alprazolam       |
| 403458001 | TRIAZOLAM        | Triazolam        |
| 403469901 | XANAX            | Alprazolam       |
| 403474914 | DORAL            | Quazepam         |
| 403474930 | DORAL            | Quazepam         |
| 403514418 | DIAZEPAM         | Diazepam         |
|           | CHLORDIAZEPOXIDE | Chlordiazepoxide |
| 405004001 | HCL              | Hydrochloride    |
|           | CHLORDIAZEPOXIDE | Chlordiazepoxide |
| 405004002 | HCL              | Hydrochloride    |
|           | CHLORDIAZEPOXIDE | Chlordiazepoxide |
| 405004101 | HCL              | Hydrochloride    |
|           | CHLORDIAZEPOXIDE | Chlordiazepoxide |
| 405004103 | HCL              | Hydrochloride    |
|           | CHLORDIAZEPOXIDE | Chlordiazepoxide |
| 405004201 | HCL              | Hydrochloride    |
| 405004202 | CHLORDIAZEPOXIDE | Chlordiazepoxide |

|           |                            |                             |
|-----------|----------------------------|-----------------------------|
|           | HCL                        | Hydrochloride               |
|           | CLORAZEPATE                | Clorazepate                 |
| 405005001 | DIPOTASSIUM<br>CLORAZEPATE | Dipotassium<br>Clorazepate  |
| 405005002 | DIPOTASSIUM<br>CLORAZEPATE | Dipotassium<br>Clorazepate  |
| 405005101 | DIPOTASSIUM<br>CLORAZEPATE | Dipotassium<br>Clorazepate  |
| 405005102 | DIPOTASSIUM<br>CLORAZEPATE | Dipotassium<br>Clorazepate  |
| 405005201 | DIPOTASSIUM                | Dipotassium                 |
| 405006801 | DIAZEPAM                   | Diazepam                    |
| 405006802 | DIAZEPAM                   | Diazepam                    |
| 405006803 | DIAZEPAM                   | Diazepam                    |
| 405006901 | DIAZEPAM                   | Diazepam                    |
| 405006902 | DIAZEPAM                   | Diazepam                    |
| 405006903 | DIAZEPAM                   | Diazepam                    |
| 405007001 | DIAZEPAM                   | Diazepam                    |
| 405007002 | DIAZEPAM                   | Diazepam                    |
|           |                            | Flurazepam                  |
| 405008501 | FLURAZEPAM HCL             | Hydrochloride<br>Flurazepam |
| 405008502 | FLURAZEPAM HCL             | Hydrochloride<br>Flurazepam |
| 405008601 | FLURAZEPAM HCL             | Hydrochloride<br>Flurazepam |
| 405008602 | FLURAZEPAM HCL             | Hydrochloride               |
| 405010801 | LORAZEPAM                  | Lorazepam                   |
| 405010802 | LORAZEPAM                  | Lorazepam                   |
| 405010901 | LORAZEPAM                  | Lorazepam                   |
| 405010902 | LORAZEPAM                  | Lorazepam                   |
| 405011001 | LORAZEPAM                  | Lorazepam                   |
| 405011002 | LORAZEPAM                  | Lorazepam                   |
| 405013201 | OXAZEPAM                   | Oxazepam                    |
| 405013202 | OXAZEPAM                   | Oxazepam                    |
| 405013301 | OXAZEPAM                   | Oxazepam                    |
| 405013302 | OXAZEPAM                   | Oxazepam                    |
| 405013401 | OXAZEPAM                   | Oxazepam                    |
| 405018501 | TEMAZEPAM                  | Temazepam                   |
| 405018502 | TEMAZEPAM                  | Temazepam                   |
| 405018601 | TEMAZEPAM                  | Temazepam                   |
| 405018602 | TEMAZEPAM                  | Temazepam                   |
| 405019202 | TRIAZOLAM                  | Triazolam                   |
| 405019210 | TRIAZOLAM                  | Triazolam                   |
| 405019302 | TRIAZOLAM                  | Triazolam                   |

|           |                                  |                            |
|-----------|----------------------------------|----------------------------|
| 405019310 | TRIAZOLAM                        | Triazolam                  |
| 405404301 | ALPRAZOLAM                       | Alprazolam                 |
| 405404302 | ALPRAZOLAM                       | Alprazolam                 |
| 405404401 | ALPRAZOLAM                       | Alprazolam                 |
| 405404402 | ALPRAZOLAM                       | Alprazolam                 |
| 405404501 | ALPRAZOLAM                       | Alprazolam                 |
| 405404502 | ALPRAZOLAM                       | Alprazolam                 |
| 406991403 | RESTORIL                         | Temazepam                  |
| 406991501 | RESTORIL                         | Temazepam                  |
| 406991503 | RESTORIL                         | Temazepam                  |
| 406991601 | RESTORIL                         | Temazepam                  |
| 406991605 | RESTORIL                         | Temazepam                  |
| 406991701 | RESTORIL                         | Temazepam                  |
| 406991705 | RESTORIL                         | Temazepam                  |
| 406995903 | TEMAZEPAM                        | Temazepam                  |
| 406996001 | TEMAZEPAM                        | Temazepam                  |
| 409127303 | DIAZEPAM                         | Diazepam                   |
| 409127305 | DIAZEPAM                         | Diazepam                   |
| 409127332 | DIAZEPAM                         | Diazepam                   |
| 409153931 | LORAZEPAM                        | Lorazepam                  |
| 409198501 | LORAZEPAM                        | Lorazepam                  |
| 409198505 | LORAZEPAM                        | Lorazepam                  |
| 409198510 | LORAZEPAM                        | Lorazepam                  |
| 409198530 | LORAZEPAM                        | Lorazepam                  |
| 409230502 | MIDAZOLAM HCL                    | Midazolam<br>Hydrochloride |
| 409230505 | MIDAZOLAM HCL                    | Midazolam<br>Hydrochloride |
| 409230517 | MIDAZOLAM<br>MIDAZOLAM HCL       | Midazolam<br>Hydrochloride |
| 409230521 | NOVAPLUS<br>MIDAZOLAM HCL        | Midazolam<br>Hydrochloride |
| 409230549 | NOVATION<br>MIDAZOLAM HCL        | Midazolam<br>Hydrochloride |
| 409230550 | NOVATION<br>MIDAZOLAM HCL        | Midazolam<br>Hydrochloride |
| 409230561 | AMERINET CHOICE<br>MIDAZOLAM HCL | Midazolam<br>Hydrochloride |
| 409230562 | AMERINET CHOICE                  | Midazolam<br>Hydrochloride |
| 409230612 | MIDAZOLAM HCL                    | Midazolam<br>Hydrochloride |
| 409230622 | MIDAZOLAM HCL                    | Midazolam<br>Hydrochloride |
| 409230662 | MIDAZOLAM HCL                    | Midazolam                  |

|           |                   |                  |
|-----------|-------------------|------------------|
|           |                   | Hydrochloride    |
|           |                   | Midazolam        |
| 409230721 | MIDAZOLAM HCL     | Hydrochloride    |
|           |                   | Midazolam        |
| 409230760 | MIDAZOLAM HCL     | Hydrochloride    |
|           |                   | Midazolam        |
| 409230801 | MIDAZOLAM HCL     | Hydrochloride    |
|           |                   | Midazolam        |
| 409230802 | MIDAZOLAM HCL     | Hydrochloride    |
|           | MIDAZOLAM HCL     | Midazolam        |
| 409230849 | NOVATION          | Hydrochloride    |
|           | MIDAZOLAM HCL     | Midazolam        |
| 409230850 | NOVATION          | Hydrochloride    |
|           |                   | Midazolam        |
| 409258705 | MIDAZOLAM HCL     | Hydrochloride    |
|           | MIDAZOLAM HCL     | Midazolam        |
| 409258753 | NOVAPLUS          | Hydrochloride    |
|           |                   | Midazolam        |
| 409259603 | MIDAZOLAM HCL     | Hydrochloride    |
|           |                   | Midazolam        |
| 409259605 | MIDAZOLAM HCL     | Hydrochloride    |
|           | MIDAZOLAM HCL     | Midazolam        |
| 409259652 | NOVAPLUS          | Hydrochloride    |
|           | MIDAZOLAM HCL     | Midazolam        |
| 409259653 | NOVATION          | Hydrochloride    |
| 409321302 | DIAZEPAM          | Diazepam         |
| 409321309 | DIAZEPAM NOVAPLUS | Diazepam         |
| 409321310 | DIAZEPAM NOVAPLUS | Diazepam         |
| 409321312 | DIAZEPAM          | Diazepam         |
| 409677802 | LORAZEPAM         | Lorazepam        |
| 409677862 | LORAZEPAM         | Lorazepam        |
| 409677902 | LORAZEPAM         | Lorazepam        |
| 409678002 | LORAZEPAM         | Lorazepam        |
| 409678102 | LORAZEPAM         | Lorazepam        |
|           | CHLORDIAZEPOXIDE  |                  |
| 436017601 | HCL               | Inactive Record  |
|           | CHLORDIAZEPOXIDE  | Chlordiazepoxide |
| 436017610 | HCL               | Hydrochloride    |
|           | CHLORDIAZEPOXIDE  | Chlordiazepoxide |
| 463204810 | HCL               | Hydrochloride    |
|           | CHLORDIAZEPOXIDE  | Chlordiazepoxide |
| 463204910 | HCL               | Hydrochloride    |
|           | CHLORDIAZEPOXIDE  | Chlordiazepoxide |
| 463205010 | HCL               | Hydrochloride    |
| 469274010 | DIAZEPAM          | Diazepam         |
| 469274030 | DIAZEPAM          | Diazepam         |

|           |                            |                            |
|-----------|----------------------------|----------------------------|
|           | CLORAZEPATE                | Clorazepate                |
| 472004710 | DIPOTASSIUM<br>CLORAZEPATE | Dipotassium<br>Clorazepate |
| 472004750 | DIPOTASSIUM<br>CLORAZEPATE | Dipotassium<br>Clorazepate |
| 472004910 | DIPOTASSIUM<br>CLORAZEPATE | Dipotassium<br>Clorazepate |
| 472004950 | DIPOTASSIUM<br>CLORAZEPATE | Dipotassium<br>Clorazepate |
| 472005110 | DIPOTASSIUM                | Dipotassium                |
| 485144510 | ED-VAL                     | Diazepam                   |
| 490004400 | VALIUM                     | Diazepam                   |
| 490004430 | VALIUM                     | Diazepam                   |
| 490004460 | VALIUM                     | Diazepam                   |
| 490004490 | VALIUM                     | Diazepam                   |
|           |                            | Chlordiazepoxide           |
| 494016010 | SEREEN                     | Hydrochloride              |
|           | CHLORDIAZEPOXIDE           | Chlordiazepoxide           |
| 527059101 | HCL                        | Hydrochloride              |
|           | CHLORDIAZEPOXIDE           | Chlordiazepoxide           |
| 527059105 | HCL                        | Hydrochloride              |
|           | CHLORDIAZEPOXIDE           | Chlordiazepoxide           |
| 527059201 | HCL                        | Hydrochloride              |
|           | CHLORDIAZEPOXIDE           | Chlordiazepoxide           |
| 527059205 | HCL                        | Hydrochloride              |
|           | CHLORDIAZEPOXIDE           | Chlordiazepoxide           |
| 527059301 | HCL                        | Hydrochloride              |
|           | CHLORDIAZEPOXIDE           | Chlordiazepoxide           |
| 527059305 | HCL                        | Hydrochloride              |
| 527112905 | DIAZEPAM                   | Diazepam                   |
| 527115305 | DIAZEPAM                   | Diazepam                   |
| 527117805 | DIAZEPAM                   | Diazepam                   |
| 527176836 | DIAZEPAM                   | Diazepam                   |
| 536323501 | ALPRAZOLAM                 | Alprazolam                 |
| 536323505 | ALPRAZOLAM                 | Alprazolam                 |
| 536323510 | ALPRAZOLAM                 | Alprazolam                 |
| 536323601 | ALPRAZOLAM                 | Alprazolam                 |
| 536323605 | ALPRAZOLAM                 | Alprazolam                 |
| 536323610 | ALPRAZOLAM                 | Alprazolam                 |
| 536323701 | ALPRAZOLAM                 | Alprazolam                 |
| 536323705 | ALPRAZOLAM                 | Alprazolam                 |
| 536323801 | ALPRAZOLAM                 | Alprazolam                 |
|           | CLORAZEPATE                | Clorazepate                |
| 536340601 | DIPOTASSIUM<br>CLORAZEPATE | Dipotassium<br>Clorazepate |
| 536340701 | DIPOTASSIUM                | Dipotassium                |

|           |                                 |                                   |
|-----------|---------------------------------|-----------------------------------|
|           | CLORAZEPATE                     | Clorazepate                       |
| 536340801 | DIPOTASSIUM<br>CLORAZEPATE      | Dipotassium<br>Clorazepate        |
| 536340901 | DIPOTASSIUM<br>CLORAZEPATE      | Dipotassium<br>Clorazepate        |
| 536341001 | DIPOTASSIUM<br>CHLORDIAZEPOXIDE | Dipotassium<br>Chlordiazepoxide   |
| 536348701 | HCL<br>CHLORDIAZEPOXIDE         | Hydrochloride<br>Chlordiazepoxide |
| 536348705 | HCL<br>CHLORDIAZEPOXIDE         | Hydrochloride<br>Chlordiazepoxide |
| 536348710 | HCL<br>CHLORDIAZEPOXIDE         | Hydrochloride<br>Chlordiazepoxide |
| 536348801 | HCL<br>CHLORDIAZEPOXIDE         | Hydrochloride<br>Chlordiazepoxide |
| 536348805 | HCL<br>CHLORDIAZEPOXIDE         | Hydrochloride<br>Chlordiazepoxide |
| 536348810 | HCL<br>CHLORDIAZEPOXIDE         | Hydrochloride<br>Chlordiazepoxide |
| 536348901 | HCL<br>CHLORDIAZEPOXIDE         | Hydrochloride<br>Chlordiazepoxide |
| 536348905 | HCL                             | Hydrochloride                     |
| 536359101 | DIAZEPAM                        | Diazepam                          |
| 536359105 | DIAZEPAM                        | Diazepam                          |
| 536359110 | DIAZEPAM                        | Diazepam                          |
| 536359201 | DIAZEPAM                        | Diazepam                          |
| 536359205 | DIAZEPAM                        | Diazepam                          |
| 536359207 | DIAZEPAM                        | Diazepam                          |
| 536359208 | DIAZEPAM                        | Diazepam                          |
| 536359210 | DIAZEPAM                        | Diazepam                          |
| 536359211 | DIAZEPAM                        | Diazepam                          |
| 536359301 | DIAZEPAM                        | Diazepam                          |
| 536359305 | DIAZEPAM                        | Diazepam                          |
| 536359308 | DIAZEPAM                        | Diazepam                          |
| 536359310 | DIAZEPAM                        | Diazepam                          |
| 536359311 | DIAZEPAM                        | Diazepam                          |
| 536373301 | DIAZEPAM                        | Diazepam                          |
| 536373305 | DIAZEPAM                        | Diazepam                          |
| 536373310 | DIAZEPAM                        | Diazepam                          |
| 536373401 | DIAZEPAM                        | Diazepam                          |
| 536373405 | DIAZEPAM                        | Diazepam                          |
| 536373410 | DIAZEPAM                        | Diazepam                          |
| 536374401 | DIAZEPAM                        | Diazepam                          |
| 536374405 | DIAZEPAM                        | Diazepam                          |
| 536374410 | DIAZEPAM                        | Diazepam                          |

|           |                            |                             |
|-----------|----------------------------|-----------------------------|
| 536379501 | FLURAZEPAM HCL             | Flurazepam<br>Hydrochloride |
| 536379505 | FLURAZEPAM HCL             | Flurazepam<br>Hydrochloride |
| 536379601 | FLURAZEPAM HCL             | Flurazepam<br>Hydrochloride |
| 536379605 | FLURAZEPAM HCL             | Flurazepam<br>Hydrochloride |
| 536395901 | LORAZEPAM                  | Lorazepam                   |
| 536395902 | LORAZEPAM                  | Lorazepam                   |
| 536395910 | LORAZEPAM                  | Lorazepam                   |
| 536396001 | LORAZEPAM                  | Lorazepam                   |
| 536396005 | LORAZEPAM                  | Lorazepam                   |
| 536396010 | LORAZEPAM                  | Lorazepam                   |
| 536396101 | LORAZEPAM                  | Lorazepam                   |
| 536396102 | LORAZEPAM                  | Lorazepam                   |
| 536396110 | LORAZEPAM                  | Lorazepam                   |
| 536411401 | OXAZEPAM                   | Oxazepam                    |
| 536411402 | OXAZEPAM                   | Oxazepam                    |
| 536411501 | OXAZEPAM                   | Oxazepam                    |
| 536411505 | OXAZEPAM                   | Oxazepam                    |
| 536411510 | OXAZEPAM                   | Oxazepam                    |
| 536411601 | OXAZEPAM                   | Oxazepam                    |
| 536411602 | OXAZEPAM                   | Oxazepam                    |
| 536411901 | OXAZEPAM                   | Oxazepam                    |
| 536420070 | DIAZEPAM                   | Diazepam                    |
| 536462801 | TEMAZEPAM                  | Temazepam                   |
| 536462805 | TEMAZEPAM                  | Temazepam                   |
| 536462901 | TEMAZEPAM                  | Temazepam                   |
| 536462905 | TEMAZEPAM                  | Temazepam                   |
| 536482401 | OXAZEPAM                   | Oxazepam                    |
| 536487601 | OXAZEPAM                   | Oxazepam                    |
| 536487701 | OXAZEPAM                   | Oxazepam                    |
| 536487705 | OXAZEPAM                   | Oxazepam                    |
| 536487801 | OXAZEPAM                   | Oxazepam                    |
| 536487901 | OXAZEPAM                   | Oxazepam                    |
| 536494001 | CLORAZEPATE<br>DIPOTASSIUM | Clorazepate<br>Dipotassium  |
| 536494005 | CLORAZEPATE<br>DIPOTASSIUM | Clorazepate<br>Dipotassium  |
| 536494101 | CLORAZEPATE<br>DIPOTASSIUM | Clorazepate<br>Dipotassium  |
| 536494105 | CLORAZEPATE<br>DIPOTASSIUM | Clorazepate<br>Dipotassium  |

|           |                  |                  |
|-----------|------------------|------------------|
|           | CLORAZEPATE      | Clorazepate      |
| 536494201 | DIPOTASSIUM      | Dipotassium      |
|           | CLORAZEPATE      | Clorazepate      |
| 536559501 | DIPOTASSIUM      | Dipotassium      |
| 536564721 | TRIAZOLAM        | Triazolam        |
| 536564821 | TRIAZOLAM        | Triazolam        |
|           | CHLORDIAZEPOXIDE | Chlordiazepoxide |
| 537617201 | HCL              | Hydrochloride    |
|           | CHLORDIAZEPOXIDE | Chlordiazepoxide |
| 537617205 | HCL              | Hydrochloride    |
|           | CHLORDIAZEPOXIDE | Chlordiazepoxide |
| 537617210 | HCL              | Hydrochloride    |
|           | CHLORDIAZEPOXIDE | Chlordiazepoxide |
| 537617301 | HCL              | Hydrochloride    |
|           | CHLORDIAZEPOXIDE | Chlordiazepoxide |
| 537617305 | HCL              | Hydrochloride    |
|           | CHLORDIAZEPOXIDE | Chlordiazepoxide |
| 537617310 | HCL              | Hydrochloride    |
|           | CHLORDIAZEPOXIDE | Chlordiazepoxide |
| 537617401 | HCL              | Hydrochloride    |
|           | CHLORDIAZEPOXIDE | Chlordiazepoxide |
| 537617405 | HCL              | Hydrochloride    |
| 537652101 | LORAZEPAM        | Lorazepam        |
| 537652201 | LORAZEPAM        | Lorazepam        |
| 537652205 | LORAZEPAM        | Lorazepam        |
| 537652301 | LORAZEPAM        | Lorazepam        |
| 537652901 | DIAZEPAM         | Diazepam         |
| 537652905 | DIAZEPAM         | Diazepam         |
| 537652910 | DIAZEPAM         | Diazepam         |
| 537653001 | DIAZEPAM         | Diazepam         |
| 537653005 | DIAZEPAM         | Diazepam         |
| 537653010 | DIAZEPAM         | Diazepam         |
| 537653101 | DIAZEPAM         | Diazepam         |
| 537653105 | DIAZEPAM         | Diazepam         |
| 537653110 | DIAZEPAM         | Diazepam         |
|           | CHLORDIAZEPOXIDE | Chlordiazepoxide |
| 555003302 | HCL              | Hydrochloride    |
|           | CHLORDIAZEPOXIDE | Chlordiazepoxide |
| 555003304 | HCL              | Hydrochloride    |
|           | CHLORDIAZEPOXIDE | Chlordiazepoxide |
| 555003305 | HCL              | Hydrochloride    |
|           | CHLORDIAZEPOXIDE | Chlordiazepoxide |
| 555015802 | HCL              | Hydrochloride    |
|           | CHLORDIAZEPOXIDE | Chlordiazepoxide |
| 555015804 | HCL              | Hydrochloride    |
| 555015805 | CHLORDIAZEPOXIDE | Chlordiazepoxide |

|           |                  |                  |
|-----------|------------------|------------------|
|           | HCL              | Hydrochloride    |
|           | CHLORDIAZEPOXIDE | Chlordiazepoxide |
| 555015902 | HCL              | Hydrochloride    |
|           | CHLORDIAZEPOXIDE | Chlordiazepoxide |
| 555015904 | HCL              | Hydrochloride    |
|           | CHLORDIAZEPOXIDE | Chlordiazepoxide |
| 555015905 | HCL              | Hydrochloride    |
| 555016302 | DIAZEPAM         | Diazepam         |
| 555016304 | DIAZEPAM         | Diazepam         |
| 555016305 | DIAZEPAM         | Diazepam         |
| 555016402 | DIAZEPAM         | Diazepam         |
| 555016404 | DIAZEPAM         | Diazepam         |
| 555016405 | DIAZEPAM         | Diazepam         |
| 555036302 | DIAZEPAM         | Diazepam         |
| 555036304 | DIAZEPAM         | Diazepam         |
| 555036305 | DIAZEPAM         | Diazepam         |
| 555037002 | LORAZEPAM        | Lorazepam        |
| 555037004 | LORAZEPAM        | Lorazepam        |
| 555037102 | LORAZEPAM        | Lorazepam        |
| 555037104 | LORAZEPAM        | Lorazepam        |
| 555037105 | LORAZEPAM        | Lorazepam        |
| 555037202 | LORAZEPAM        | Lorazepam        |
| 555037204 | LORAZEPAM        | Lorazepam        |
| 555037205 | LORAZEPAM        | Lorazepam        |
| 555037302 | OXAZEPAM         | Oxazepam         |
| 555037402 | OXAZEPAM         | Oxazepam         |
| 555037404 | OXAZEPAM         | Oxazepam         |
| 555037502 | OXAZEPAM         | Oxazepam         |
| 555037504 | OXAZEPAM         | Oxazepam         |
| 555037602 | OXAZEPAM         | Oxazepam         |
| 555037604 | OXAZEPAM         | Oxazepam         |
|           |                  | Flurazepam       |
| 555037702 | FLURAZEPAM HCL   | Hydrochloride    |
|           |                  | Flurazepam       |
| 555037704 | FLURAZEPAM HCL   | Hydrochloride    |
|           |                  | Flurazepam       |
| 555037802 | FLURAZEPAM HCL   | Hydrochloride    |
|           |                  | Flurazepam       |
| 555037804 | FLURAZEPAM HCL   | Hydrochloride    |
| 555048702 | TEMAZEPAM        | Temazepam        |
| 555048704 | TEMAZEPAM        | Temazepam        |
| 555048804 | TEMAZEPAM        | Temazepam        |
| 555049109 | ALPRAZOLAM       | Alprazolam       |
| 555049209 | ALPRAZOLAM       | Alprazolam       |

|           |                  |                  |
|-----------|------------------|------------------|
| 555049309 | ALPRAZOLAM       | Alprazolam       |
| 555049409 | ALPRAZOLAM       | Alprazolam       |
|           | CHLORDIAZEPOXIDE | Chlordiazepoxide |
| 556015201 | HCL              | Hydrochloride    |
|           | CHLORDIAZEPOXIDE | Chlordiazepoxide |
| 556015205 | HCL              | Hydrochloride    |
|           | CHLORDIAZEPOXIDE | Chlordiazepoxide |
| 556015301 | HCL              | Hydrochloride    |
|           | CHLORDIAZEPOXIDE | Chlordiazepoxide |
| 556015305 | HCL              | Hydrochloride    |
|           | CHLORDIAZEPOXIDE | Chlordiazepoxide |
| 556015401 | HCL              | Hydrochloride    |
|           | CHLORDIAZEPOXIDE | Chlordiazepoxide |
| 556015405 | HCL              | Hydrochloride    |
|           |                  | Midazolam        |
| 574015004 | MIDAZOLAM HCL    | Hydrochloride    |
| 574016330 | LORAZEPAM        | Lorazepam        |
|           | CHLORDIAZEPOXIDE | Chlordiazepoxide |
| 580008101 | HCL              | Hydrochloride    |
|           | CHLORDIAZEPOXIDE | Chlordiazepoxide |
| 580008105 | HCL              | Hydrochloride    |
|           | CHLORDIAZEPOXIDE | Chlordiazepoxide |
| 580008110 | HCL              | Hydrochloride    |
|           | CHLORDIAZEPOXIDE | Chlordiazepoxide |
| 580008201 | HCL              | Hydrochloride    |
|           | CHLORDIAZEPOXIDE | Chlordiazepoxide |
| 580008205 | HCL              | Hydrochloride    |
|           | CHLORDIAZEPOXIDE | Chlordiazepoxide |
| 580008210 | HCL              | Hydrochloride    |
|           | CHLORDIAZEPOXIDE | Chlordiazepoxide |
| 580008301 | HCL              | Hydrochloride    |
|           | CHLORDIAZEPOXIDE | Chlordiazepoxide |
| 580008305 | HCL              | Hydrochloride    |
| 580118001 | DIAZEPAM         | Diazepam         |
| 580118005 | DIAZEPAM         | Diazepam         |
| 580118010 | DIAZEPAM         | Diazepam         |
| 580118101 | DIAZEPAM         | Diazepam         |
| 580118105 | DIAZEPAM         | Diazepam         |
| 580118110 | DIAZEPAM         | Diazepam         |
| 580118201 | DIAZEPAM         | Diazepam         |
| 580118205 | DIAZEPAM         | Diazepam         |
| 580118210 | DIAZEPAM         | Diazepam         |
| 580126001 | LORAZEPAM        | Lorazepam        |
| 580126005 | LORAZEPAM        | Lorazepam        |
| 580126101 | LORAZEPAM        | Lorazepam        |
| 580126110 | LORAZEPAM        | Lorazepam        |

|           |                            |                             |
|-----------|----------------------------|-----------------------------|
| 580126201 | LORAZEPAM                  | Lorazepam                   |
| 580126210 | LORAZEPAM                  | Lorazepam                   |
| 580133001 | TEMAZEPAM                  | Temazepam                   |
| 580133005 | TEMAZEPAM                  | Temazepam                   |
| 580133101 | TEMAZEPAM                  | Temazepam                   |
| 580133105 | TEMAZEPAM                  | Temazepam<br>Flurazepam     |
| 580136601 | FLURAZEPAM HCL             | Hydrochloride<br>Flurazepam |
| 580136701 | FLURAZEPAM HCL             | Hydrochloride<br>Flurazepam |
| 580136705 | FLURAZEPAM HCL             | Hydrochloride               |
| 580151701 | OXAZEPAM                   | Oxazepam                    |
| 580151705 | OXAZEPAM                   | Oxazepam                    |
| 580151801 | OXAZEPAM                   | Oxazepam                    |
| 580151805 | OXAZEPAM                   | Oxazepam                    |
| 580151901 | OXAZEPAM                   | Oxazepam                    |
| 580151905 | OXAZEPAM                   | Oxazepam                    |
|           | CLORAZEPATE                | Clorazepate                 |
| 580158101 | DIPOTASSIUM<br>CLORAZEPATE | Dipotassium<br>Clorazepate  |
| 580158105 | DIPOTASSIUM<br>CLORAZEPATE | Dipotassium<br>Clorazepate  |
| 580158201 | DIPOTASSIUM<br>CLORAZEPATE | Dipotassium<br>Clorazepate  |
| 580158205 | DIPOTASSIUM<br>CLORAZEPATE | Dipotassium<br>Clorazepate  |
| 580158301 | DIPOTASSIUM                | Dipotassium                 |
| 591024001 | LORAZEPAM                  | Lorazepam                   |
| 591024005 | LORAZEPAM                  | Lorazepam                   |
| 591024010 | LORAZEPAM                  | Lorazepam                   |
| 591024101 | LORAZEPAM                  | Lorazepam                   |
| 591024105 | LORAZEPAM                  | Lorazepam                   |
| 591024110 | LORAZEPAM                  | Lorazepam                   |
| 591024201 | LORAZEPAM                  | Lorazepam                   |
| 591024205 | LORAZEPAM                  | Lorazepam                   |
| 591024210 | LORAZEPAM                  | Lorazepam                   |
|           | CLORAZEPATE                | Clorazepate                 |
| 591036301 | DIPOTASSIUM<br>CLORAZEPATE | Dipotassium<br>Clorazepate  |
| 591036305 | DIPOTASSIUM<br>CLORAZEPATE | Dipotassium<br>Clorazepate  |
| 591036401 | DIPOTASSIUM<br>CLORAZEPATE | Dipotassium<br>Clorazepate  |
| 591036405 | DIPOTASSIUM                | Dipotassium                 |

|           |                  |                  |
|-----------|------------------|------------------|
|           | CLORAZEPATE      | Clorazepate      |
| 591036501 | DIPOTASSIUM      | Dipotassium      |
| 591074401 | ESTAZOLAM        | Estazolam        |
| 591074501 | ESTAZOLAM        | Estazolam        |
|           | CHLORDIAZEPOXIDE | Chlordiazepoxide |
| 591078501 | HCL              | Hydrochloride    |
|           | CHLORDIAZEPOXIDE | Chlordiazepoxide |
| 591078505 | HCL              | Hydrochloride    |
|           | CHLORDIAZEPOXIDE | Chlordiazepoxide |
| 591078601 | HCL              | Hydrochloride    |
|           | CHLORDIAZEPOXIDE | Chlordiazepoxide |
| 591078605 | HCL              | Hydrochloride    |
|           | CHLORDIAZEPOXIDE | Chlordiazepoxide |
| 591078610 | HCL              | Hydrochloride    |
|           | CHLORDIAZEPOXIDE | Chlordiazepoxide |
| 591078701 | HCL              | Hydrochloride    |
|           | CHLORDIAZEPOXIDE | Chlordiazepoxide |
| 591078705 | HCL              | Hydrochloride    |
| 591336545 | LORAZEPAM        | Lorazepam        |
| 591336570 | LORAZEPAM        | Lorazepam        |
|           |                  | Flurazepam       |
| 591561401 | FLURAZEPAM HCL   | Hydrochloride    |
|           |                  | Flurazepam       |
| 591561403 | FLURAZEPAM HCL   | Hydrochloride    |
|           |                  | Flurazepam       |
| 591561404 | FLURAZEPAM HCL   | Hydrochloride    |
|           |                  | Flurazepam       |
| 591561501 | FLURAZEPAM HCL   | Hydrochloride    |
|           |                  | Flurazepam       |
| 591561503 | FLURAZEPAM HCL   | Hydrochloride    |
|           |                  | Flurazepam       |
| 591561504 | FLURAZEPAM HCL   | Hydrochloride    |
| 591561601 | OXAZEPAM         | Oxazepam         |
| 591561701 | OXAZEPAM         | Oxazepam         |
| 591561801 | OXAZEPAM         | Oxazepam         |
| 591561901 | DIAZEPAM         | Diazepam         |
| 591561903 | DIAZEPAM         | Diazepam         |
| 591561904 | DIAZEPAM         | Diazepam         |
| 591561905 | DIAZEPAM         | Diazepam         |
| 591561910 | DIAZEPAM         | Diazepam         |
| 591562001 | DIAZEPAM         | Diazepam         |
| 591562003 | DIAZEPAM         | Diazepam         |
| 591562004 | DIAZEPAM         | Diazepam         |
| 591562005 | DIAZEPAM         | Diazepam         |
| 591562010 | DIAZEPAM         | Diazepam         |
| 591562101 | DIAZEPAM         | Diazepam         |

|           |                  |                  |
|-----------|------------------|------------------|
| 591562103 | DIAZEPAM         | Diazepam         |
| 591562104 | DIAZEPAM         | Diazepam         |
| 591562105 | DIAZEPAM         | Diazepam         |
| 591562110 | DIAZEPAM         | Diazepam         |
| 591562201 | LORAZEPAM        | Lorazepam        |
| 591562203 | LORAZEPAM        | Lorazepam        |
| 591562204 | LORAZEPAM        | Lorazepam        |
| 591562401 | LORAZEPAM        | Lorazepam        |
| 591562403 | LORAZEPAM        | Lorazepam        |
| 591562404 | LORAZEPAM        | Lorazepam        |
| 591562501 | LORAZEPAM        | Lorazepam        |
| 591562503 | LORAZEPAM        | Lorazepam        |
| 591562504 | LORAZEPAM        | Lorazepam        |
| 591564601 | OXAZEPAM         | Oxazepam         |
| 591564603 | OXAZEPAM         | Oxazepam         |
| 591564604 | OXAZEPAM         | Oxazepam         |
| 603212721 | ALPRAZOLAM       | Alprazolam       |
| 603212728 | ALPRAZOLAM       | Alprazolam       |
| 603212732 | ALPRAZOLAM       | Alprazolam       |
| 603212821 | ALPRAZOLAM       | Alprazolam       |
| 603212828 | ALPRAZOLAM       | Alprazolam       |
| 603212832 | ALPRAZOLAM       | Alprazolam       |
| 603212921 | ALPRAZOLAM       | Alprazolam       |
| 603212928 | ALPRAZOLAM       | Alprazolam       |
| 603212932 | ALPRAZOLAM       | Alprazolam       |
| 603213021 | ALPRAZOLAM       | Alprazolam       |
| 603213028 | ALPRAZOLAM       | Alprazolam       |
| 603213120 | ALPRAZOLAM       | Alprazolam       |
| 603213220 | ALPRAZOLAM       | Alprazolam       |
| 603213320 | ALPRAZOLAM       | Alprazolam       |
| 603213420 | ALPRAZOLAM       | Alprazolam       |
| 603234621 | ALPRAZOLAM       | Alprazolam       |
| 603234628 | ALPRAZOLAM       | Alprazolam       |
| 603234721 | ALPRAZOLAM       | Alprazolam       |
| 603234728 | ALPRAZOLAM       | Alprazolam       |
| 603234821 | ALPRAZOLAM       | Alprazolam       |
| 603234828 | ALPRAZOLAM       | Alprazolam       |
|           | CHLORDIAZEPOXIDE | Chlordiazepoxide |
| 603266621 | HCL              | Hydrochloride    |
|           | CHLORDIAZEPOXIDE | Chlordiazepoxide |
| 603266632 | HCL              | Hydrochloride    |
|           | CHLORDIAZEPOXIDE | Chlordiazepoxide |
| 603266721 | HCL              | Hydrochloride    |

|           |                            |                                   |
|-----------|----------------------------|-----------------------------------|
| 603266732 | CHLORDIAZEPOXIDE<br>HCL    | Chlordiazepoxide<br>Hydrochloride |
| 603266821 | CHLORDIAZEPOXIDE<br>HCL    | Chlordiazepoxide<br>Hydrochloride |
| 603266828 | CHLORDIAZEPOXIDE<br>HCL    | Chlordiazepoxide<br>Hydrochloride |
| 603300321 | CLORAZEPATE<br>DIPOTASSIUM | Clorazepate<br>Dipotassium        |
| 603300421 | CLORAZEPATE<br>DIPOTASSIUM | Clorazepate<br>Dipotassium        |
| 603300428 | CLORAZEPATE<br>DIPOTASSIUM | Clorazepate<br>Dipotassium        |
| 603300521 | CLORAZEPATE<br>DIPOTASSIUM | Clorazepate<br>Dipotassium        |
| 603300528 | CLORAZEPATE<br>DIPOTASSIUM | Clorazepate<br>Dipotassium        |
| 603300621 | CLORAZEPATE<br>DIPOTASSIUM | Clorazepate<br>Dipotassium        |
| 603321316 | DIAZEPAM                   | Diazepam                          |
| 603321320 | DIAZEPAM                   | Diazepam                          |
| 603321321 | DIAZEPAM                   | Diazepam                          |
| 603321328 | DIAZEPAM                   | Diazepam                          |
| 603321402 | DIAZEPAM                   | Diazepam                          |
| 603321416 | DIAZEPAM                   | Diazepam                          |
| 603321420 | DIAZEPAM                   | Diazepam                          |
| 603321421 | DIAZEPAM                   | Diazepam                          |
| 603321422 | DIAZEPAM                   | Diazepam                          |
| 603321428 | DIAZEPAM                   | Diazepam                          |
| 603321432 | DIAZEPAM                   | Diazepam                          |
| 603321502 | DIAZEPAM                   | Diazepam                          |
| 603321516 | DIAZEPAM                   | Diazepam                          |
| 603321520 | DIAZEPAM                   | Diazepam                          |
| 603321521 | DIAZEPAM                   | Diazepam                          |
| 603321522 | DIAZEPAM                   | Diazepam                          |
| 603321528 | DIAZEPAM                   | Diazepam                          |
| 603321532 | DIAZEPAM                   | Diazepam                          |
| 603321628 | DIAZEPAM                   | Diazepam                          |
| 603321728 | DIAZEPAM                   | Diazepam                          |
| 603321828 | DIAZEPAM                   | Diazepam                          |
| 603369121 | FLURAZEPAM HCL             | Flurazepam<br>Hydrochloride       |
| 603369128 | FLURAZEPAM HCL             | Flurazepam<br>Hydrochloride       |
| 603369221 | FLURAZEPAM HCL             | Flurazepam<br>Hydrochloride       |

|           |                |                             |
|-----------|----------------|-----------------------------|
| 603369228 | FLURAZEPAM HCL | Flurazepam<br>Hydrochloride |
| 603424321 | LORAZEPAM      | Lorazepam                   |
| 603424328 | LORAZEPAM      | Lorazepam                   |
| 603424421 | LORAZEPAM      | Lorazepam                   |
| 603424428 | LORAZEPAM      | Lorazepam                   |
| 603424432 | LORAZEPAM      | Lorazepam                   |
| 603424521 | LORAZEPAM      | Lorazepam                   |
| 603424528 | LORAZEPAM      | Lorazepam                   |
| 603424532 | LORAZEPAM      | Lorazepam                   |
| 603424621 | LORAZEPAM      | Lorazepam                   |
| 603424628 | LORAZEPAM      | Lorazepam                   |
| 603424632 | LORAZEPAM      | Lorazepam                   |
| 603424721 | LORAZEPAM      | Lorazepam                   |
| 603424728 | LORAZEPAM      | Lorazepam                   |
| 603424732 | LORAZEPAM      | Lorazepam                   |
| 603424821 | LORAZEPAM      | Lorazepam                   |
| 603424828 | LORAZEPAM      | Lorazepam                   |
| 603424832 | LORAZEPAM      | Lorazepam                   |
| 603495021 | OXAZEPAM       | Oxazepam                    |
| 603495121 | OXAZEPAM       | Oxazepam                    |
| 603495221 | OXAZEPAM       | Oxazepam                    |
| 603589121 | TEMAZEPAM      | Temazepam                   |
| 603589221 | TEMAZEPAM      | Temazepam                   |
| 603589228 | TEMAZEPAM      | Temazepam                   |
| 603589316 | TEMAZEPAM      | Temazepam                   |
| 603589421 | TEMAZEPAM      | Temazepam                   |
| 603589428 | TEMAZEPAM      | Temazepam                   |
| 603589521 | TEMAZEPAM      | Temazepam                   |
| 603589528 | TEMAZEPAM      | Temazepam                   |
| 603589621 | TEMAZEPAM      | Temazepam                   |
| 603589628 | TEMAZEPAM      | Temazepam                   |
| 603618610 | TRIAZOLAM      | Triazolam                   |
| 603618628 | TRIAZOLAM      | Triazolam                   |
| 603618710 | TRIAZOLAM      | Triazolam                   |
| 603618728 | TRIAZOLAM      | Triazolam                   |
| 615040113 | ALPRAZOLAM     | Alprazolam                  |
| 615040129 | ALPRAZOLAM     | Alprazolam                  |
| 615040143 | ALPRAZOLAM     | Alprazolam                  |
| 615040153 | ALPRAZOLAM     | Alprazolam                  |
| 615040163 | ALPRAZOLAM     | Alprazolam                  |
| 615040165 | ALPRAZOLAM     | Alprazolam                  |
| 615040313 | ALPRAZOLAM     | Alprazolam                  |

|           |                  |                  |
|-----------|------------------|------------------|
| 615040353 | ALPRAZOLAM       | Alprazolam       |
| 615040363 | ALPRAZOLAM       | Alprazolam       |
| 615040365 | ALPRAZOLAM       | Alprazolam       |
| 615040913 | OXAZEPAM         | Oxazepam         |
| 615041013 | OXAZEPAM         | Oxazepam         |
| 615041113 | OXAZEPAM         | Oxazepam         |
| 615042613 | ALPRAZOLAM       | Alprazolam       |
| 615042629 | ALPRAZOLAM       | Alprazolam       |
| 615042643 | ALPRAZOLAM       | Alprazolam       |
| 615042653 | ALPRAZOLAM       | Alprazolam       |
| 615042663 | ALPRAZOLAM       | Alprazolam       |
| 615042665 | ALPRAZOLAM       | Alprazolam       |
| 615043501 | CHLORDIAZEPOXIDE | Chlordiazepoxide |
|           | HCL              | Hydrochloride    |
| 615043505 | CHLORDIAZEPOXIDE | Chlordiazepoxide |
|           | HCL              | Hydrochloride    |
| 615043510 | CHLORDIAZEPOXIDE | Chlordiazepoxide |
|           | HCL              | Hydrochloride    |
| 615043513 | CHLORDIAZEPOXIDE | Chlordiazepoxide |
|           | HCL              | Hydrochloride    |
| 615043539 | CHLORDIAZEPOXIDE | Chlordiazepoxide |
|           | HCL              | Hydrochloride    |
| 615043547 | CHLORDIAZEPOXIDE | Chlordiazepoxide |
|           | HCL              | Hydrochloride    |
| 615043553 | CHLORDIAZEPOXIDE | Chlordiazepoxide |
|           | HCL              | Hydrochloride    |
| 615043563 | CHLORDIAZEPOXIDE | Chlordiazepoxide |
|           | HCL              | Hydrochloride    |
| 615043565 | CHLORDIAZEPOXIDE | Chlordiazepoxide |
|           | HCL              | Hydrochloride    |
| 615043601 | CHLORDIAZEPOXIDE | Chlordiazepoxide |
|           | HCL              | Hydrochloride    |
| 615043610 | CHLORDIAZEPOXIDE | Chlordiazepoxide |
|           | HCL              | Hydrochloride    |
| 615043613 | CHLORDIAZEPOXIDE | Chlordiazepoxide |
|           | HCL              | Hydrochloride    |
| 615043639 | CHLORDIAZEPOXIDE | Chlordiazepoxide |
|           | HCL              | Hydrochloride    |
| 615043647 | CHLORDIAZEPOXIDE | Chlordiazepoxide |
|           | HCL              | Hydrochloride    |
| 615043653 | CHLORDIAZEPOXIDE | Chlordiazepoxide |
|           | HCL              | Hydrochloride    |
| 615043663 | CHLORDIAZEPOXIDE | Chlordiazepoxide |
|           | HCL              | Hydrochloride    |
| 615043665 | CHLORDIAZEPOXIDE | Chlordiazepoxide |
|           | HCL              | Hydrochloride    |

|           |                         |                                   |
|-----------|-------------------------|-----------------------------------|
| 615043701 | CHLORDIAZEPOXIDE<br>HCL | Chlordiazepoxide<br>Hydrochloride |
| 615043705 | CHLORDIAZEPOXIDE<br>HCL | Chlordiazepoxide<br>Hydrochloride |
| 615043710 | CHLORDIAZEPOXIDE<br>HCL | Chlordiazepoxide<br>Hydrochloride |
| 615043713 | CHLORDIAZEPOXIDE<br>HCL | Chlordiazepoxide<br>Hydrochloride |
| 615043739 | CHLORDIAZEPOXIDE<br>HCL | Chlordiazepoxide<br>Hydrochloride |
| 615043747 | CHLORDIAZEPOXIDE<br>HCL | Chlordiazepoxide<br>Hydrochloride |
| 615043753 | CHLORDIAZEPOXIDE<br>HCL | Chlordiazepoxide<br>Hydrochloride |
| 615043763 | CHLORDIAZEPOXIDE<br>HCL | Chlordiazepoxide<br>Hydrochloride |
| 615043765 | CHLORDIAZEPOXIDE<br>HCL | Chlordiazepoxide<br>Hydrochloride |
| 615045001 | LORAZEPAM               | Lorazepam                         |
| 615045005 | LORAZEPAM               | Lorazepam                         |
| 615045010 | LORAZEPAM               | Lorazepam                         |
| 615045013 | LORAZEPAM               | Lorazepam                         |
| 615045029 | LORAZEPAM               | Lorazepam                         |
| 615045032 | LORAZEPAM               | Lorazepam                         |
| 615045039 | LORAZEPAM               | Lorazepam                         |
| 615045043 | LORAZEPAM               | Lorazepam                         |
| 615045047 | LORAZEPAM               | Lorazepam                         |
| 615045053 | LORAZEPAM               | Lorazepam                         |
| 615045063 | LORAZEPAM               | Lorazepam                         |
| 615045101 | LORAZEPAM               | Lorazepam                         |
| 615045105 | LORAZEPAM               | Lorazepam                         |
| 615045110 | LORAZEPAM               | Lorazepam                         |
| 615045113 | LORAZEPAM               | Lorazepam                         |
| 615045129 | LORAZEPAM               | Lorazepam                         |
| 615045132 | LORAZEPAM               | Lorazepam                         |
| 615045139 | LORAZEPAM               | Lorazepam                         |
| 615045143 | LORAZEPAM               | Lorazepam                         |
| 615045147 | LORAZEPAM               | Lorazepam                         |
| 615045153 | LORAZEPAM               | Lorazepam                         |
| 615045163 | LORAZEPAM               | Lorazepam                         |
| 615045201 | LORAZEPAM               | Lorazepam                         |
| 615045205 | LORAZEPAM               | Lorazepam                         |
| 615045210 | LORAZEPAM               | Lorazepam                         |
| 615045213 | LORAZEPAM               | Lorazepam                         |
| 615045229 | LORAZEPAM               | Lorazepam                         |

|           |                |               |
|-----------|----------------|---------------|
| 615045243 | LORAZEPAM      | Lorazepam     |
| 615045247 | LORAZEPAM      | Lorazepam     |
| 615045253 | LORAZEPAM      | Lorazepam     |
| 615045263 | LORAZEPAM      | Lorazepam     |
|           |                | Flurazepam    |
| 615046001 | FLURAZEPAM HCL | Hydrochloride |
|           |                | Flurazepam    |
| 615046005 | FLURAZEPAM HCL | Hydrochloride |
|           |                | Flurazepam    |
| 615046013 | FLURAZEPAM HCL | Hydrochloride |
|           |                | Flurazepam    |
| 615046029 | FLURAZEPAM HCL | Hydrochloride |
|           |                | Flurazepam    |
| 615046032 | FLURAZEPAM HCL | Hydrochloride |
|           |                | Flurazepam    |
| 615046047 | FLURAZEPAM HCL | Hydrochloride |
|           |                | Flurazepam    |
| 615046101 | FLURAZEPAM HCL | Hydrochloride |
|           |                | Flurazepam    |
| 615046105 | FLURAZEPAM HCL | Hydrochloride |
|           |                | Flurazepam    |
| 615046113 | FLURAZEPAM HCL | Hydrochloride |
|           |                | Flurazepam    |
| 615046129 | FLURAZEPAM HCL | Hydrochloride |
|           |                | Flurazepam    |
| 615046147 | FLURAZEPAM HCL | Hydrochloride |
| 615046943 | TEMAZEPAM      | Temazepam     |
| 615046953 | TEMAZEPAM      | Temazepam     |
| 615046963 | TEMAZEPAM      | Temazepam     |
| 615047005 | TEMAZEPAM      | Temazepam     |
| 615047013 | TEMAZEPAM      | Temazepam     |
| 615047029 | TEMAZEPAM      | Temazepam     |
| 615047043 | TEMAZEPAM      | Temazepam     |
| 615047047 | TEMAZEPAM      | Temazepam     |
| 615047053 | TEMAZEPAM      | Temazepam     |
| 615047063 | TEMAZEPAM      | Temazepam     |
| 615047065 | TEMAZEPAM      | Temazepam     |
| 615047105 | TEMAZEPAM      | Temazepam     |
| 615047113 | TEMAZEPAM      | Temazepam     |
| 615047129 | TEMAZEPAM      | Temazepam     |
| 615047143 | TEMAZEPAM      | Temazepam     |
| 615047147 | TEMAZEPAM      | Temazepam     |
| 615047153 | TEMAZEPAM      | Temazepam     |
| 615047163 | TEMAZEPAM      | Temazepam     |
| 615047165 | TEMAZEPAM      | Temazepam     |

|           |           |           |
|-----------|-----------|-----------|
| 615153201 | DIAZEPAM  | Diazepam  |
| 615153210 | DIAZEPAM  | Diazepam  |
| 615153213 | DIAZEPAM  | Diazepam  |
| 615153229 | DIAZEPAM  | Diazepam  |
| 615153232 | DIAZEPAM  | Diazepam  |
| 615153239 | DIAZEPAM  | Diazepam  |
| 615153243 | DIAZEPAM  | Diazepam  |
| 615153247 | DIAZEPAM  | Diazepam  |
| 615153253 | DIAZEPAM  | Diazepam  |
| 615153263 | DIAZEPAM  | Diazepam  |
| 615153301 | DIAZEPAM  | Diazepam  |
| 615153310 | DIAZEPAM  | Diazepam  |
| 615153313 | DIAZEPAM  | Diazepam  |
| 615153329 | DIAZEPAM  | Diazepam  |
| 615153332 | DIAZEPAM  | Diazepam  |
| 615153339 | DIAZEPAM  | Diazepam  |
| 615153343 | DIAZEPAM  | Diazepam  |
| 615153347 | DIAZEPAM  | Diazepam  |
| 615153353 | DIAZEPAM  | Diazepam  |
| 615153363 | DIAZEPAM  | Diazepam  |
| 615153410 | DIAZEPAM  | Diazepam  |
| 615153413 | DIAZEPAM  | Diazepam  |
| 615153439 | DIAZEPAM  | Diazepam  |
| 615153447 | DIAZEPAM  | Diazepam  |
| 641036923 | DIAZEPAM  | Diazepam  |
| 641036925 | DIAZEPAM  | Diazepam  |
| 641037123 | DIAZEPAM  | Diazepam  |
| 641037125 | DIAZEPAM  | Diazepam  |
| 641140833 | DIAZEPAM  | Diazepam  |
| 641140835 | DIAZEPAM  | Diazepam  |
| 641228941 | DIAZEPAM  | Diazepam  |
| 641228943 | DIAZEPAM  | Diazepam  |
| 641320003 | DIAZEPAM  | Diazepam  |
| 641320103 | DIAZEPAM  | Diazepam  |
| 641329103 | LORAZEPAM | Lorazepam |
| 641329403 | LORAZEPAM | Lorazepam |
| 641400086 | LORAZEPAM | Lorazepam |
| 641400088 | LORAZEPAM | Lorazepam |
| 641400186 | LORAZEPAM | Lorazepam |
| 641400188 | LORAZEPAM | Lorazepam |
| 641400189 | LORAZEPAM | Lorazepam |
| 641400286 | LORAZEPAM | Lorazepam |
| 641400288 | LORAZEPAM | Lorazepam |

|           |                            |                            |
|-----------|----------------------------|----------------------------|
| 641400289 | LORAZEPAM                  | Lorazepam                  |
| 641401386 | DIAZEPAM                   | Diazepam                   |
| 641401388 | DIAZEPAM                   | Diazepam                   |
| 641401389 | DIAZEPAM                   | Diazepam                   |
| 641401486 | DIAZEPAM                   | Diazepam                   |
| 641401488 | DIAZEPAM                   | Diazepam                   |
| 641401489 | DIAZEPAM                   | Diazepam                   |
| 641401586 | DIAZEPAM                   | Diazepam                   |
| 641401588 | DIAZEPAM                   | Diazepam                   |
| 641401589 | DIAZEPAM                   | Diazepam                   |
|           | CLORAZEPATE                | Clorazepate                |
| 641402586 | DIPOTASSIUM<br>CLORAZEPATE | Dipotassium<br>Clorazepate |
| 641402588 | DIPOTASSIUM<br>CLORAZEPATE | Dipotassium<br>Clorazepate |
| 641402686 | DIPOTASSIUM<br>CLORAZEPATE | Dipotassium<br>Clorazepate |
| 641402688 | DIPOTASSIUM<br>CLORAZEPATE | Dipotassium<br>Clorazepate |
| 641402786 | DIPOTASSIUM                | Dipotassium                |
| 641450886 | OXAZEPAM                   | Oxazepam                   |
| 641450888 | OXAZEPAM                   | Oxazepam                   |
| 641450986 | OXAZEPAM                   | Oxazepam                   |
| 641450988 | OXAZEPAM                   | Oxazepam                   |
| 641451086 | OXAZEPAM                   | Oxazepam                   |
| 641451088 | OXAZEPAM                   | Oxazepam                   |
| 641451186 | TEMAZEPAM                  | Temazepam                  |
| 641451188 | TEMAZEPAM                  | Temazepam                  |
| 641451286 | TEMAZEPAM                  | Temazepam                  |
| 641451288 | TEMAZEPAM                  | Temazepam                  |
| 641600010 | ATIVAN                     | Lorazepam                  |
| 641600125 | ATIVAN                     | Lorazepam                  |
| 641600210 | ATIVAN                     | Lorazepam                  |
| 641600325 | ATIVAN                     | Lorazepam                  |
| 641604401 | LORAZEPAM                  | Lorazepam                  |
| 641604425 | LORAZEPAM                  | Lorazepam                  |
| 641604525 | LORAZEPAM                  | Lorazepam                  |
| 641604610 | LORAZEPAM                  | Lorazepam                  |
| 641604710 | LORAZEPAM                  | Lorazepam                  |
| 641604825 | LORAZEPAM NOVAPLUS         | Lorazepam                  |
| 641604925 | LORAZEPAM NOVAPLUS         | Lorazepam                  |
| 641605010 | LORAZEPAM NOVAPLUS         | Lorazepam                  |
| 641605110 | LORAZEPAM NOVAPLUS         | Lorazepam                  |
| 641605601 | MIDAZOLAM HCL              | Midazolam                  |

|           |                  |                  |
|-----------|------------------|------------------|
|           |                  | Hydrochloride    |
|           |                  | Midazolam        |
| 641605610 | MIDAZOLAM HCL    | Hydrochloride    |
|           |                  | Midazolam        |
| 641605701 | MIDAZOLAM HCL    | Hydrochloride    |
|           |                  | Midazolam        |
| 641605710 | MIDAZOLAM HCL    | Hydrochloride    |
|           |                  | Midazolam        |
| 641605725 | MIDAZOLAM HCL    | Hydrochloride    |
|           |                  | Midazolam        |
| 641605901 | MIDAZOLAM HCL    | Hydrochloride    |
|           |                  | Midazolam        |
| 641605910 | MIDAZOLAM HCL    | Hydrochloride    |
|           |                  | Midazolam        |
| 641606001 | MIDAZOLAM HCL    | Hydrochloride    |
|           |                  | Midazolam        |
| 641606010 | MIDAZOLAM HCL    | Hydrochloride    |
|           |                  | Midazolam        |
| 641606101 | MIDAZOLAM HCL    | Hydrochloride    |
|           |                  | Midazolam        |
| 641606110 | MIDAZOLAM HCL    | Hydrochloride    |
|           |                  | Midazolam        |
| 641606125 | MIDAZOLAM HCL    | Hydrochloride    |
|           |                  | Midazolam        |
| 641606301 | MIDAZOLAM HCL    | Hydrochloride    |
|           |                  | Midazolam        |
| 641606310 | MIDAZOLAM HCL    | Hydrochloride    |
|           |                  | Midazolam        |
| 641606325 | MIDAZOLAM HCL    | Hydrochloride    |
| 641628711 | DIAZEPAM         | Diazepam         |
| 641628811 | DIAZEPAM         | Diazepam         |
|           | CHLORDIAZEPOXIDE | Chlordiazepoxide |
| 677045701 | HCL              | Hydrochloride    |
|           | CHLORDIAZEPOXIDE | Chlordiazepoxide |
| 677045705 | HCL              | Hydrochloride    |
|           | CHLORDIAZEPOXIDE |                  |
| 677045709 | HCL              | Inactive Record  |
|           | CHLORDIAZEPOXIDE | Chlordiazepoxide |
| 677045710 | HCL              | Hydrochloride    |
|           | CHLORDIAZEPOXIDE | Chlordiazepoxide |
| 677045801 | HCL              | Hydrochloride    |
|           | CHLORDIAZEPOXIDE | Chlordiazepoxide |
| 677045805 | HCL              | Hydrochloride    |
|           | CHLORDIAZEPOXIDE |                  |
| 677045809 | HCL              | Inactive Record  |
|           | CHLORDIAZEPOXIDE | Chlordiazepoxide |
| 677045810 | HCL              | Hydrochloride    |

|           |                           |                                   |
|-----------|---------------------------|-----------------------------------|
| 677045901 | CHLORDIAZEPOXIDE<br>HCL   | Chlordiazepoxide<br>Hydrochloride |
| 677045905 | CHLORDIAZEPOXIDE<br>HCL   | Chlordiazepoxide<br>Hydrochloride |
| 677045909 | CHLORDIAZEPOXIDE<br>HCL   | Inactive Record                   |
| 677104801 | DIAZEPAM                  | Diazepam                          |
| 677104805 | DIAZEPAM                  | Diazepam                          |
| 677104810 | DIAZEPAM                  | Inactive Record                   |
| 677104901 | DIAZEPAM                  | Diazepam                          |
| 677104905 | DIAZEPAM                  | Diazepam                          |
| 677104910 | DIAZEPAM                  | Diazepam                          |
| 677105001 | DIAZEPAM                  | Diazepam                          |
| 677105005 | DIAZEPAM                  | Diazepam                          |
| 677105601 | LORAZEPAM                 | Lorazepam                         |
| 677105605 | LORAZEPAM                 | Lorazepam                         |
| 677105606 | LORAZEPAM                 | Lorazepam                         |
| 677105607 | LORAZEPAM                 | Lorazepam                         |
| 677105701 | LORAZEPAM                 | Lorazepam                         |
| 677105705 | LORAZEPAM                 | Lorazepam                         |
| 677105706 | LORAZEPAM                 | Lorazepam                         |
| 677105707 | LORAZEPAM                 | Lorazepam                         |
| 677105710 | LORAZEPAM                 | Lorazepam                         |
| 677105801 | LORAZEPAM                 | Lorazepam                         |
| 677105805 | LORAZEPAM                 | Lorazepam                         |
| 677105806 | LORAZEPAM                 | Lorazepam                         |
| 677105807 | LORAZEPAM                 | Lorazepam                         |
| 677106501 | FLURAZEPAM HCL            | Flurazepam<br>Hydrochloride       |
| 677106505 | FLURAZEPAM HCL            | Inactive Record<br>Flurazepam     |
| 677106601 | FLURAZEPAM HCL            | Hydrochloride<br>Flurazepam       |
| 677106605 | FLURAZEPAM HCL            | Hydrochloride                     |
| 677106901 | TEMAZEPAM                 | Temazepam                         |
| 677106905 | TEMAZEPAM                 | Inactive Record                   |
| 677107001 | TEMAZEPAM                 | Temazepam                         |
| 677107005 | TEMAZEPAM                 | Temazepam                         |
| 677108821 | DIAZEPAM                  | Diazepam                          |
| 677116301 | OXAZEPAM                  | Oxazepam                          |
| 677116701 | CLOAZEPATE<br>DIPOTASSIUM | Clorazepate<br>Dipotassium        |
| 677116801 | CLOAZEPATE<br>DIPOTASSIUM | Clorazepate<br>Dipotassium        |

|           |                            |                            |
|-----------|----------------------------|----------------------------|
|           | CLORAZEPATE                | Clorazepate                |
| 677116901 | DIPOTASSIUM<br>CLORAZEPATE | Dipotassium<br>Clorazepate |
| 677117501 | DIPOTASSIUM<br>CLORAZEPATE | Dipotassium<br>Clorazepate |
| 677117601 | DIPOTASSIUM<br>CLORAZEPATE | Dipotassium<br>Clorazepate |
| 677117701 | DIPOTASSIUM                | Dipotassium                |
| 677118101 | OXAZEPAM                   | Oxazepam                   |
| 677118201 | OXAZEPAM                   | Oxazepam                   |
| 677118301 | OXAZEPAM                   | Oxazepam                   |
| 677149601 | ALPRAZOLAM                 | Alprazolam                 |
| 677149605 | ALPRAZOLAM                 | Alprazolam                 |
| 677149701 | ALPRAZOLAM                 | Alprazolam                 |
| 677149705 | ALPRAZOLAM                 | Alprazolam                 |
| 677149801 | ALPRAZOLAM                 | Alprazolam                 |
| 677149805 | ALPRAZOLAM                 | Alprazolam                 |
|           | CHLORDIAZEPOXIDE           | Chlordiazepoxide           |
| 719019010 | HCL                        | Hydrochloride              |
|           | CHLORDIAZEPOXIDE           | Chlordiazepoxide           |
| 719019012 | HCL                        | Hydrochloride              |
|           | CHLORDIAZEPOXIDE           | Chlordiazepoxide           |
| 719019013 | HCL                        | Hydrochloride              |
|           | CHLORDIAZEPOXIDE           | Chlordiazepoxide           |
| 719019110 | HCL                        | Hydrochloride              |
|           | CHLORDIAZEPOXIDE           | Chlordiazepoxide           |
| 719019112 | HCL                        | Hydrochloride              |
|           | CHLORDIAZEPOXIDE           | Chlordiazepoxide           |
| 719019113 | HCL                        | Hydrochloride              |
|           | CHLORDIAZEPOXIDE           | Chlordiazepoxide           |
| 719019210 | HCL                        | Hydrochloride              |
|           | CHLORDIAZEPOXIDE           | Chlordiazepoxide           |
| 719019212 | HCL                        | Hydrochloride              |
|           | CHLORDIAZEPOXIDE           | Chlordiazepoxide           |
| 719019213 | HCL                        | Hydrochloride              |
|           | CLORAZEPATE                | Clorazepate                |
| 719019510 | DIPOTASSIUM<br>CLORAZEPATE | Dipotassium<br>Clorazepate |
| 719019512 | DIPOTASSIUM<br>CLORAZEPATE | Dipotassium<br>Clorazepate |
| 719019610 | DIPOTASSIUM<br>CLORAZEPATE | Dipotassium<br>Clorazepate |
| 719019612 | DIPOTASSIUM<br>CLORAZEPATE | Dipotassium<br>Clorazepate |
| 719019710 | DIPOTASSIUM                | Dipotassium                |
| 719026110 | DIAZEPAM                   | Diazepam                   |

|           |                  |                  |
|-----------|------------------|------------------|
| 719026112 | DIAZEPAM         | Diazepam         |
| 719026113 | DIAZEPAM         | Diazepam         |
| 719026210 | DIAZEPAM         | Diazepam         |
| 719026212 | DIAZEPAM         | Diazepam         |
| 719026213 | DIAZEPAM         | Diazepam         |
| 719026310 | DIAZEPAM         | Diazepam         |
| 719026312 | DIAZEPAM         | Diazepam         |
| 719026313 | DIAZEPAM         | Diazepam         |
| 719026487 | DIAZEPAM         | Diazepam         |
|           |                  | Flurazepam       |
| 719030410 | FLURAZEPAM HCL   | Hydrochloride    |
|           |                  | Flurazepam       |
| 719030412 | FLURAZEPAM HCL   | Hydrochloride    |
|           |                  | Flurazepam       |
| 719030510 | FLURAZEPAM HCL   | Hydrochloride    |
|           |                  | Flurazepam       |
| 719030512 | FLURAZEPAM HCL   | Hydrochloride    |
| 719052010 | LORAZEPAM        | Lorazepam        |
| 719052012 | LORAZEPAM        | Lorazepam        |
| 719052110 | LORAZEPAM        | Lorazepam        |
| 719052112 | LORAZEPAM        | Lorazepam        |
| 719052113 | LORAZEPAM        | Lorazepam        |
| 719052210 | LORAZEPAM        | Lorazepam        |
| 719052212 | LORAZEPAM        | Lorazepam        |
| 719059010 | OXAZEPAM         | Oxazepam         |
| 719059110 | OXAZEPAM         | Oxazepam         |
| 719059210 | OXAZEPAM         | Oxazepam         |
| 719059310 | OXAZEPAM         | Oxazepam         |
| 719059410 | OXAZEPAM         | Oxazepam         |
| 719059510 | OXAZEPAM         | Oxazepam         |
| 719059610 | OXAZEPAM         | Oxazepam         |
| 719072010 | TEMAZEPAM        | Temazepam        |
| 719072012 | TEMAZEPAM        | Temazepam        |
| 719072110 | TEMAZEPAM        | Temazepam        |
| 719072112 | TEMAZEPAM        | Temazepam        |
| 725208701 | TEMAZEPAM        | Temazepam        |
| 725208705 | TEMAZEPAM        | Temazepam        |
| 725208801 | TEMAZEPAM        | Temazepam        |
| 725208805 | TEMAZEPAM        | Temazepam        |
|           | CHLORDIAZEPOXIDE | Chlordiazepoxide |
| 779022025 | HCL              | Hydrochloride    |
|           | CHLORDIAZEPOXIDE | Chlordiazepoxide |
| 779022027 | HCL              | Hydrochloride    |
| 779022030 | CHLORDIAZEPOXIDE | Chlordiazepoxide |

|           |                  |                  |
|-----------|------------------|------------------|
|           | HCL              | Hydrochloride    |
|           | CHLORDIAZEPOXIDE | Chlordiazepoxide |
| 779022125 | HCL              | Hydrochloride    |
|           | CHLORDIAZEPOXIDE | Chlordiazepoxide |
| 779022127 | HCL              | Hydrochloride    |
|           | CHLORDIAZEPOXIDE | Chlordiazepoxide |
| 779022130 | HCL              | Hydrochloride    |
|           | CHLORDIAZEPOXIDE | Chlordiazepoxide |
| 779022225 | HCL              | Hydrochloride    |
|           | CHLORDIAZEPOXIDE | Chlordiazepoxide |
| 779022227 | HCL              | Hydrochloride    |
|           | CHLORDIAZEPOXIDE | Chlordiazepoxide |
| 779022230 | HCL              | Hydrochloride    |
| 781106101 | ALPRAZOLAM       | Alprazolam       |
| 781106105 | ALPRAZOLAM       | Alprazolam       |
| 781106110 | ALPRAZOLAM       | Alprazolam       |
| 781106113 | ALPRAZOLAM       | Alprazolam       |
| 781107701 | ALPRAZOLAM       | Alprazolam       |
| 781107705 | ALPRAZOLAM       | Alprazolam       |
| 781107710 | ALPRAZOLAM       | Alprazolam       |
| 781107713 | ALPRAZOLAM       | Alprazolam       |
| 781107901 | ALPRAZOLAM       | Alprazolam       |
| 781107905 | ALPRAZOLAM       | Alprazolam       |
| 781107910 | ALPRAZOLAM       | Alprazolam       |
| 781107913 | ALPRAZOLAM       | Alprazolam       |
| 781108901 | ALPRAZOLAM       | Alprazolam       |
| 781108905 | ALPRAZOLAM       | Alprazolam       |
| 781132601 | ALPRAZOLAM       | Alprazolam       |
| 781132605 | ALPRAZOLAM       | Alprazolam       |
| 781132610 | ALPRAZOLAM       | Alprazolam       |
| 781132613 | ALPRAZOLAM       | Alprazolam       |
| 781132701 | ALPRAZOLAM       | Alprazolam       |
| 781132705 | ALPRAZOLAM       | Alprazolam       |
| 781132710 | ALPRAZOLAM       | Alprazolam       |
| 781132713 | ALPRAZOLAM       | Alprazolam       |
| 781132801 | ALPRAZOLAM       | Alprazolam       |
| 781132805 | ALPRAZOLAM       | Alprazolam       |
| 781132810 | ALPRAZOLAM       | Alprazolam       |
| 781132813 | ALPRAZOLAM       | Alprazolam       |
| 781132901 | ALPRAZOLAM       | Alprazolam       |
| 781132905 | ALPRAZOLAM       | Alprazolam       |
| 781132910 | ALPRAZOLAM       | Alprazolam       |
| 781140301 | LORAZEPAM        | Lorazepam        |
| 781140305 | LORAZEPAM        | Lorazepam        |

|           |                                 |                                   |
|-----------|---------------------------------|-----------------------------------|
| 781140313 | LORAZEPAM                       | Lorazepam                         |
| 781140401 | LORAZEPAM                       | Lorazepam                         |
| 781140405 | LORAZEPAM                       | Lorazepam                         |
| 781140410 | LORAZEPAM                       | Lorazepam                         |
| 781140413 | LORAZEPAM                       | Lorazepam                         |
| 781140501 | LORAZEPAM                       | Lorazepam                         |
| 781140505 | LORAZEPAM                       | Lorazepam                         |
| 781140513 | LORAZEPAM                       | Lorazepam                         |
| 781144105 | TRIAZOLAM                       | Triazolam                         |
| 781144113 | TRIAZOLAM                       | Triazolam                         |
| 781144183 | TRIAZOLAM                       | Triazolam                         |
| 781144205 | TRIAZOLAM                       | Triazolam                         |
| 781144213 | TRIAZOLAM                       | Triazolam                         |
| 781144283 | TRIAZOLAM                       | Triazolam                         |
| 781148201 | DIAZEPAM                        | Diazepam                          |
| 781148205 | DIAZEPAM                        | Diazepam                          |
| 781148213 | DIAZEPAM                        | Diazepam                          |
| 781148301 | DIAZEPAM                        | Diazepam                          |
| 781148305 | DIAZEPAM                        | Diazepam                          |
| 781148313 | DIAZEPAM                        | Diazepam                          |
| 781148401 | DIAZEPAM                        | Diazepam                          |
| 781148405 | DIAZEPAM                        | Diazepam                          |
| 781148413 | DIAZEPAM                        | Diazepam                          |
|           | CLORAZEPATE                     | Clorazepate                       |
| 781186501 | DIPOTASSIUM<br>CLORAZEPATE      | Dipotassium<br>Clorazepate        |
| 781186505 | DIPOTASSIUM<br>CLORAZEPATE      | Dipotassium<br>Clorazepate        |
| 781186513 | DIPOTASSIUM<br>CLORAZEPATE      | Dipotassium<br>Clorazepate        |
| 781186601 | DIPOTASSIUM<br>CLORAZEPATE      | Dipotassium<br>Clorazepate        |
| 781186605 | DIPOTASSIUM<br>CLORAZEPATE      | Dipotassium<br>Clorazepate        |
| 781186613 | DIPOTASSIUM<br>CLORAZEPATE      | Dipotassium<br>Clorazepate        |
| 781186701 | DIPOTASSIUM<br>CHLORDIAZEPOXIDE | Dipotassium<br>Chlordiazepoxide   |
| 781208001 | HCL<br>CHLORDIAZEPOXIDE         | Hydrochloride<br>Chlordiazepoxide |
| 781208005 | HCL<br>CHLORDIAZEPOXIDE         | Hydrochloride<br>Chlordiazepoxide |
| 781208010 | HCL<br>CHLORDIAZEPOXIDE         | Hydrochloride<br>Chlordiazepoxide |
| 781208013 | HCL                             | Hydrochloride                     |

|           |                            |                                   |
|-----------|----------------------------|-----------------------------------|
| 781208201 | CHLORDIAZEPOXIDE<br>HCL    | Chlordiazepoxide<br>Hydrochloride |
| 781208205 | CHLORDIAZEPOXIDE<br>HCL    | Chlordiazepoxide<br>Hydrochloride |
| 781208210 | CHLORDIAZEPOXIDE<br>HCL    | Chlordiazepoxide<br>Hydrochloride |
| 781208213 | CHLORDIAZEPOXIDE<br>HCL    | Chlordiazepoxide<br>Hydrochloride |
| 781208401 | CHLORDIAZEPOXIDE<br>HCL    | Chlordiazepoxide<br>Hydrochloride |
| 781208405 | CHLORDIAZEPOXIDE<br>HCL    | Chlordiazepoxide<br>Hydrochloride |
| 781208410 | CHLORDIAZEPOXIDE<br>HCL    | Chlordiazepoxide<br>Hydrochloride |
| 781208413 | CHLORDIAZEPOXIDE<br>HCL    | Chlordiazepoxide<br>Hydrochloride |
| 781220101 | TEMAZEPAM                  | Temazepam                         |
| 781220105 | TEMAZEPAM                  | Temazepam                         |
| 781220113 | TEMAZEPAM                  | Temazepam                         |
| 781220201 | TEMAZEPAM                  | Temazepam                         |
| 781220205 | TEMAZEPAM                  | Temazepam                         |
| 781220213 | TEMAZEPAM                  | Temazepam                         |
| 781220601 | CLORAZEPATE<br>DIPOTASSIUM | Clorazepate<br>Dipotassium        |
| 781220701 | CLORAZEPATE<br>DIPOTASSIUM | Clorazepate<br>Dipotassium        |
| 781220801 | CLORAZEPATE<br>DIPOTASSIUM | Clorazepate<br>Dipotassium        |
| 781220901 | TEMAZEPAM                  | Temazepam                         |
| 781280601 | FLURAZEPAM HCL             | Flurazepam<br>Hydrochloride       |
| 781280605 | FLURAZEPAM HCL             | Flurazepam<br>Hydrochloride       |
| 781280701 | FLURAZEPAM HCL             | Flurazepam<br>Hydrochloride       |
| 781280705 | FLURAZEPAM HCL             | Flurazepam<br>Hydrochloride       |
| 781280901 | OXAZEPAM                   | Oxazepam                          |
| 781281001 | OXAZEPAM                   | Oxazepam                          |
| 781281005 | OXAZEPAM                   | Oxazepam                          |
| 781281101 | OXAZEPAM                   | Oxazepam                          |
| 781537101 | LORAZEPAM                  | Lorazepam                         |
| 781537105 | LORAZEPAM                  | Lorazepam                         |
| 781537701 | LORAZEPAM                  | Lorazepam                         |
| 781537705 | LORAZEPAM                  | Lorazepam                         |
| 781537901 | LORAZEPAM                  | Lorazepam                         |

|           |                                 |                                   |
|-----------|---------------------------------|-----------------------------------|
| 781537905 | LORAZEPAM                       | Lorazepam                         |
| 781540401 | LORAZEPAM                       | Lorazepam                         |
| 781540405 | LORAZEPAM                       | Lorazepam                         |
| 781540601 | LORAZEPAM                       | Lorazepam                         |
| 781540605 | LORAZEPAM                       | Lorazepam                         |
| 781540801 | LORAZEPAM                       | Lorazepam                         |
| 781540805 | LORAZEPAM                       | Lorazepam                         |
|           | CLORAZEPATE                     | Clorazepate                       |
| 814162014 | DIPOTASSIUM<br>CLORAZEPATE      | Dipotassium<br>Clorazepate        |
| 814162114 | DIPOTASSIUM<br>CHLORDIAZEPOXIDE | Dipotassium<br>Chlordiazepoxide   |
| 814163614 | HCL<br>CHLORDIAZEPOXIDE         | Hydrochloride<br>Chlordiazepoxide |
| 814163628 | HCL<br>CHLORDIAZEPOXIDE         | Hydrochloride<br>Chlordiazepoxide |
| 814163714 | HCL<br>CHLORDIAZEPOXIDE         | Hydrochloride<br>Chlordiazepoxide |
| 814163728 | HCL<br>CHLORDIAZEPOXIDE         | Hydrochloride<br>Chlordiazepoxide |
| 814163730 | HCL<br>CHLORDIAZEPOXIDE         | Hydrochloride<br>Chlordiazepoxide |
| 814163814 | HCL<br>CHLORDIAZEPOXIDE         | Hydrochloride<br>Chlordiazepoxide |
| 814163828 | HCL<br>CHLORDIAZEPOXIDE         | Hydrochloride<br>Chlordiazepoxide |
| 814163830 | HCL                             | Hydrochloride                     |
| 814239514 | DIAZEPAM                        | Diazepam                          |
| 814239528 | DIAZEPAM                        | Diazepam                          |
| 814239614 | DIAZEPAM                        | Diazepam                          |
| 814239628 | DIAZEPAM                        | Diazepam                          |
| 814239714 | DIAZEPAM                        | Diazepam                          |
| 814239728 | DIAZEPAM                        | Diazepam                          |
| 814239940 | DIAZEPAM                        | Diazepam                          |
| 814240035 | DIAZEPAM                        | Diazepam                          |
|           |                                 | Flurazepam                        |
| 814324414 | FLURAZEPAM HCL                  | Hydrochloride<br>Flurazepam       |
| 814324428 | FLURAZEPAM HCL                  | Hydrochloride<br>Flurazepam       |
| 814324514 | FLURAZEPAM HCL                  | Hydrochloride<br>Flurazepam       |
| 814324528 | FLURAZEPAM HCL                  | Hydrochloride                     |
| 814448014 | LORAZEPAM                       | Lorazepam                         |
| 814448028 | LORAZEPAM                       | Lorazepam                         |
| 814448114 | LORAZEPAM                       | Lorazepam                         |

|           |                  |                  |
|-----------|------------------|------------------|
| 814448128 | LORAZEPAM        | Lorazepam        |
| 814448214 | LORAZEPAM        | Lorazepam        |
| 814448228 | LORAZEPAM        | Lorazepam        |
| 814760014 | TEMAZEPAM        | Temazepam        |
| 814760028 | TEMAZEPAM        | Temazepam        |
| 814760214 | TEMAZEPAM        | Temazepam        |
| 814760228 | TEMAZEPAM        | Temazepam        |
| 832026100 | TEMAZEPAM        | Temazepam        |
| 832026110 | TEMAZEPAM        | Temazepam        |
| 832026113 | TEMAZEPAM        | Temazepam        |
| 832026150 | TEMAZEPAM        | Temazepam        |
| 832026200 | TEMAZEPAM        | Temazepam        |
| 832026210 | TEMAZEPAM        | Temazepam        |
| 832026213 | TEMAZEPAM        | Temazepam        |
| 832026250 | TEMAZEPAM        | Temazepam        |
|           | CHLORDIAZEPOXIDE | Chlordiazepoxide |
| 832030500 | HCL              | Hydrochloride    |
|           | CHLORDIAZEPOXIDE | Chlordiazepoxide |
| 832030510 | HCL              | Hydrochloride    |
|           | CHLORDIAZEPOXIDE | Chlordiazepoxide |
| 832030513 | HCL              | Hydrochloride    |
|           | CHLORDIAZEPOXIDE | Chlordiazepoxide |
| 832030550 | HCL              | Hydrochloride    |
|           | CHLORDIAZEPOXIDE | Chlordiazepoxide |
| 832030600 | HCL              | Hydrochloride    |
|           | CHLORDIAZEPOXIDE | Chlordiazepoxide |
| 832030610 | HCL              | Hydrochloride    |
|           | CHLORDIAZEPOXIDE | Chlordiazepoxide |
| 832030613 | HCL              | Hydrochloride    |
|           | CHLORDIAZEPOXIDE | Chlordiazepoxide |
| 832030650 | HCL              | Hydrochloride    |
|           | CHLORDIAZEPOXIDE | Chlordiazepoxide |
| 832030700 | HCL              | Hydrochloride    |
|           | CHLORDIAZEPOXIDE | Chlordiazepoxide |
| 832030710 | HCL              | Hydrochloride    |
|           | CHLORDIAZEPOXIDE | Chlordiazepoxide |
| 832030713 | HCL              | Hydrochloride    |
|           | CHLORDIAZEPOXIDE | Chlordiazepoxide |
| 832030750 | HCL              | Hydrochloride    |
| 832091015 | LORAZEPAM        | Lorazepam        |
| 832091115 | LORAZEPAM        | Lorazepam        |
| 832091215 | LORAZEPAM        | Lorazepam        |
|           |                  | Flurazepam       |
| 832100300 | FLURAZEPAM HCL   | Hydrochloride    |
|           |                  | Flurazepam       |
| 832100350 | FLURAZEPAM HCL   | Hydrochloride    |

|           |                            |                                           |
|-----------|----------------------------|-------------------------------------------|
| 832100400 | FLURAZEPAM HCL             | Flurazepam<br>Hydrochloride<br>Flurazepam |
| 832100450 | FLURAZEPAM HCL             | Hydrochloride                             |
| 832101600 | LORAZEPAM                  | Lorazepam                                 |
| 832101610 | LORAZEPAM                  | Lorazepam                                 |
| 832101650 | LORAZEPAM                  | Lorazepam                                 |
| 832101700 | LORAZEPAM                  | Lorazepam                                 |
| 832101710 | LORAZEPAM                  | Lorazepam                                 |
| 832101750 | LORAZEPAM                  | Lorazepam                                 |
|           | CLORAZEPATE                | Clorazepate                               |
| 832101900 | DIPOTASSIUM<br>CLORAZEPATE | Dipotassium<br>Clorazepate                |
| 832101950 | DIPOTASSIUM<br>CLORAZEPATE | Dipotassium<br>Clorazepate                |
| 832102000 | DIPOTASSIUM<br>CLORAZEPATE | Dipotassium<br>Clorazepate                |
| 832102050 | DIPOTASSIUM<br>CLORAZEPATE | Dipotassium<br>Clorazepate                |
| 832102100 | DIPOTASSIUM<br>CLORAZEPATE | Dipotassium<br>Clorazepate                |
| 832102150 | DIPOTASSIUM                | Dipotassium                               |
| 832103200 | DIAZEPAM                   | Diazepam                                  |
| 832103210 | DIAZEPAM                   | Diazepam                                  |
| 832103250 | DIAZEPAM                   | Diazepam                                  |
| 832103300 | DIAZEPAM                   | Diazepam                                  |
| 832103310 | DIAZEPAM                   | Diazepam                                  |
| 832103350 | DIAZEPAM                   | Diazepam                                  |
| 832103400 | DIAZEPAM                   | Diazepam                                  |
| 832103410 | DIAZEPAM                   | Diazepam                                  |
| 832103450 | DIAZEPAM                   | Diazepam                                  |
|           | CHLORDIAZEPOXIDE           | Chlordiazepoxide                          |
| 839113006 | HCL                        | Hydrochloride                             |
|           | CHLORDIAZEPOXIDE           | Chlordiazepoxide                          |
| 839113012 | HCL                        | Hydrochloride                             |
|           | CHLORDIAZEPOXIDE           | Chlordiazepoxide                          |
| 839113016 | HCL                        | Hydrochloride                             |
|           | CHLORDIAZEPOXIDE           | Chlordiazepoxide                          |
| 839113106 | HCL                        | Hydrochloride                             |
|           | CHLORDIAZEPOXIDE           | Chlordiazepoxide                          |
| 839113112 | HCL                        | Hydrochloride                             |
|           | CHLORDIAZEPOXIDE           | Chlordiazepoxide                          |
| 839113116 | HCL                        | Hydrochloride                             |
|           | CHLORDIAZEPOXIDE           |                                           |
| 839113120 | HCL                        | Inactive Record                           |
| 839113206 | CHLORDIAZEPOXIDE           | Chlordiazepoxide                          |

|           |                  |                  |
|-----------|------------------|------------------|
|           | HCL              | Hydrochloride    |
|           | CHLORDIAZEPOXIDE | Chlordiazepoxide |
| 839113212 | HCL              | Hydrochloride    |
|           | CHLORDIAZEPOXIDE | Chlordiazepoxide |
| 839113216 | HCL              | Hydrochloride    |
|           | CHLORDIAZEPOXIDE |                  |
| 839113220 | HCL              | Inactive Record  |
| 839713106 | DIAZEPAM         | Diazepam         |
| 839713112 | DIAZEPAM         | Diazepam         |
| 839713116 | DIAZEPAM         | Diazepam         |
| 839713206 | DIAZEPAM         | Diazepam         |
| 839713212 | DIAZEPAM         | Diazepam         |
| 839713216 | DIAZEPAM         | Diazepam         |
| 839713306 | DIAZEPAM         | Diazepam         |
| 839713312 | DIAZEPAM         | Diazepam         |
| 839713316 | DIAZEPAM         | Diazepam         |
| 839714506 | LORAZEPAM        | Lorazepam        |
| 839714512 | LORAZEPAM        | Lorazepam        |
| 839714606 | LORAZEPAM        | Lorazepam        |
| 839714612 | LORAZEPAM        | Lorazepam        |
| 839714616 | LORAZEPAM        | Lorazepam        |
| 839714706 | LORAZEPAM        | Lorazepam        |
| 839714712 | LORAZEPAM        | Lorazepam        |
| 839714716 | LORAZEPAM        | Lorazepam        |
|           |                  | Flurazepam       |
| 839715406 | FLURAZEPAM HCL   | Hydrochloride    |
|           |                  | Flurazepam       |
| 839715412 | FLURAZEPAM HCL   | Hydrochloride    |
|           |                  | Flurazepam       |
| 839715506 | FLURAZEPAM HCL   | Hydrochloride    |
|           |                  | Flurazepam       |
| 839715512 | FLURAZEPAM HCL   | Hydrochloride    |
| 839716406 | TEMAZEPAM        | Temazepam        |
| 839716412 | TEMAZEPAM        | Temazepam        |
| 839716506 | TEMAZEPAM        | Temazepam        |
| 839716512 | TEMAZEPAM        | Temazepam        |
| 839719030 | DIAZEPAM         | Diazepam         |
| 839721006 | OXAZEPAM         | Oxazepam         |
| 839721012 | OXAZEPAM         | Oxazepam         |
| 839721106 | OXAZEPAM         | Oxazepam         |
| 839721112 | OXAZEPAM         | Oxazepam         |
| 839721206 | OXAZEPAM         | Oxazepam         |
|           | CLORAZEPATE      | Clorazepate      |
| 839733206 | DIPOTASSIUM      | Dipotassium      |

|           |                  |                  |
|-----------|------------------|------------------|
|           | CLORAZEPATE      | Clorazepate      |
| 839733306 | DIPOTASSIUM      | Dipotassium      |
|           | CLORAZEPATE      | Clorazepate      |
| 839733406 | DIPOTASSIUM      | Dipotassium      |
|           | CLORAZEPATE      | Clorazepate      |
| 839733506 | DIPOTASSIUM      | Dipotassium      |
|           | CLORAZEPATE      | Clorazepate      |
| 839733512 | DIPOTASSIUM      | Dipotassium      |
|           | CLORAZEPATE      | Clorazepate      |
| 839733606 | DIPOTASSIUM      | Dipotassium      |
|           | CLORAZEPATE      | Clorazepate      |
| 839733612 | DIPOTASSIUM      | Dipotassium      |
|           | CLORAZEPATE      | Clorazepate      |
| 839733706 | DIPOTASSIUM      | Dipotassium      |
| 839734506 | OXAZEPAM         | Oxazepam         |
| 839750106 | OXAZEPAM         | Oxazepam         |
| 839750112 | OXAZEPAM         | Oxazepam         |
| 839750206 | OXAZEPAM         | Oxazepam         |
| 839750212 | OXAZEPAM         | Oxazepam         |
| 839750306 | OXAZEPAM         | Oxazepam         |
| 839785106 | ALPRAZOLAM       | Alprazolam       |
| 839785112 | ALPRAZOLAM       | Alprazolam       |
| 839785206 | ALPRAZOLAM       | Alprazolam       |
| 839785212 | ALPRAZOLAM       | Alprazolam       |
| 839785306 | ALPRAZOLAM       | Alprazolam       |
| 839785312 | ALPRAZOLAM       | Alprazolam       |
| 839789906 | TEMAZEPAM        | Temazepam        |
| 839789912 | TEMAZEPAM        | Temazepam        |
| 839790006 | TEMAZEPAM        | Temazepam        |
| 839790012 | TEMAZEPAM        | Temazepam        |
| 839790206 | LORAZEPAM        | Lorazepam        |
| 839790216 | LORAZEPAM        | Lorazepam        |
| 839790306 | LORAZEPAM        | Lorazepam        |
| 839790316 | LORAZEPAM        | Lorazepam        |
| 839790406 | LORAZEPAM        | Lorazepam        |
| 839790416 | LORAZEPAM        | Lorazepam        |
|           | CHLORDIAZEPOXIDE | Chlordiazepoxide |
| 879036401 | HCL              | Hydrochloride    |
|           | CHLORDIAZEPOXIDE | Chlordiazepoxide |
| 879036405 | HCL              | Hydrochloride    |
|           | CHLORDIAZEPOXIDE | Chlordiazepoxide |
| 879036410 | HCL              | Hydrochloride    |
|           | CHLORDIAZEPOXIDE | Chlordiazepoxide |
| 879036501 | HCL              | Hydrochloride    |
| 879036505 | CHLORDIAZEPOXIDE | Chlordiazepoxide |

|           |                  |                  |
|-----------|------------------|------------------|
|           | HCL              | Hydrochloride    |
|           | CHLORDIAZEPOXIDE | Chlordiazepoxide |
| 879036510 | HCL              | Hydrochloride    |
|           | CHLORDIAZEPOXIDE | Chlordiazepoxide |
| 879036601 | HCL              | Hydrochloride    |
|           | CHLORDIAZEPOXIDE | Chlordiazepoxide |
| 879036605 | HCL              | Hydrochloride    |
|           | CHLORDIAZEPOXIDE | Chlordiazepoxide |
| 879036610 | HCL              | Hydrochloride    |
|           |                  | Flurazepam       |
| 879053301 | FLURAZEPAM HCL   | Hydrochloride    |
|           |                  | Flurazepam       |
| 879053305 | FLURAZEPAM HCL   | Hydrochloride    |
|           |                  | Flurazepam       |
| 879053401 | FLURAZEPAM HCL   | Hydrochloride    |
|           |                  | Flurazepam       |
| 879053405 | FLURAZEPAM HCL   | Hydrochloride    |
| 879054401 | DIAZEPAM         | Diazepam         |
| 879054405 | DIAZEPAM         | Diazepam         |
| 879054410 | DIAZEPAM         | Diazepam         |
| 879054601 | DIAZEPAM         | Diazepam         |
| 879054605 | DIAZEPAM         | Diazepam         |
| 879054610 | DIAZEPAM         | Diazepam         |
| 879054901 | DIAZEPAM         | Diazepam         |
| 879054905 | DIAZEPAM         | Diazepam         |
| 879054910 | DIAZEPAM         | Diazepam         |
| 879056501 | LORAZEPAM        | Lorazepam        |
| 879056505 | LORAZEPAM        | Lorazepam        |
| 879056510 | LORAZEPAM        | Lorazepam        |
| 879057201 | LORAZEPAM        | Lorazepam        |
| 879057205 | LORAZEPAM        | Lorazepam        |
| 879057210 | LORAZEPAM        | Lorazepam        |
| 879057301 | LORAZEPAM        | Lorazepam        |
| 879057305 | LORAZEPAM        | Lorazepam        |
| 879057310 | LORAZEPAM        | Lorazepam        |
|           | CHLORDIAZEPOXIDE | Chlordiazepoxide |
| 904009040 | HCL              | Hydrochloride    |
|           | CHLORDIAZEPOXIDE | Chlordiazepoxide |
| 904009060 | HCL              | Hydrochloride    |
|           | CHLORDIAZEPOXIDE | Chlordiazepoxide |
| 904009080 | HCL              | Hydrochloride    |
|           | CHLORDIAZEPOXIDE | Chlordiazepoxide |
| 904009140 | HCL              | Hydrochloride    |
|           | CHLORDIAZEPOXIDE | Chlordiazepoxide |
| 904009160 | HCL              | Hydrochloride    |

|           |                         |                                   |
|-----------|-------------------------|-----------------------------------|
| 904009180 | CHLORDIAZEPOXIDE<br>HCL | Chlordiazepoxide<br>Hydrochloride |
| 904009240 | CHLORDIAZEPOXIDE<br>HCL | Chlordiazepoxide<br>Hydrochloride |
| 904009260 | CHLORDIAZEPOXIDE<br>HCL | Chlordiazepoxide<br>Hydrochloride |
| 904009280 | CHLORDIAZEPOXIDE<br>HCL | Chlordiazepoxide<br>Hydrochloride |
| 904150040 | LORAZEPAM               | Lorazepam                         |
| 904150060 | LORAZEPAM               | Lorazepam                         |
| 904150061 | LORAZEPAM               | Lorazepam                         |
| 904150080 | LORAZEPAM               | Lorazepam                         |
| 904150140 | LORAZEPAM               | Lorazepam                         |
| 904150160 | LORAZEPAM               | Lorazepam                         |
| 904150161 | LORAZEPAM               | Lorazepam                         |
| 904150180 | LORAZEPAM               | Lorazepam                         |
| 904150240 | LORAZEPAM               | Lorazepam                         |
| 904150260 | LORAZEPAM               | Lorazepam                         |
| 904150261 | LORAZEPAM               | Lorazepam                         |
| 904150280 | LORAZEPAM               | Lorazepam                         |
| 904189040 | OXAZEPAM                | Oxazepam                          |
| 904189060 | OXAZEPAM                | Oxazepam                          |
| 904189140 | OXAZEPAM                | Oxazepam                          |
| 904189160 | OXAZEPAM                | Oxazepam                          |
| 904189240 | OXAZEPAM                | Oxazepam                          |
| 904189260 | OXAZEPAM                | Oxazepam                          |
| 904189460 | OXAZEPAM                | Oxazepam                          |
| 904192040 | OXAZEPAM                | Oxazepam                          |
| 904192060 | OXAZEPAM                | Oxazepam                          |
| 904192140 | OXAZEPAM                | Oxazepam                          |
| 904192160 | OXAZEPAM                | Oxazepam                          |
| 904192240 | OXAZEPAM                | Oxazepam                          |
| 904192260 | OXAZEPAM                | Oxazepam                          |
| 904280040 | FLURAZEPAM HCL          | Flurazepam<br>Hydrochloride       |
| 904280060 | FLURAZEPAM HCL          | Flurazepam<br>Hydrochloride       |
| 904280061 | FLURAZEPAM HCL          | Flurazepam<br>Hydrochloride       |
| 904280140 | FLURAZEPAM HCL          | Flurazepam<br>Hydrochloride       |
| 904280160 | FLURAZEPAM HCL          | Flurazepam<br>Hydrochloride       |
| 904280161 | FLURAZEPAM HCL          | Flurazepam<br>Hydrochloride       |

|           |                            |                            |
|-----------|----------------------------|----------------------------|
| 904281040 | TEMAZEPAM                  | Temazepam                  |
| 904281060 | TEMAZEPAM                  | Temazepam                  |
| 904281061 | TEMAZEPAM                  | Temazepam                  |
| 904281140 | TEMAZEPAM                  | Temazepam                  |
| 904281160 | TEMAZEPAM                  | Temazepam                  |
| 904281161 | TEMAZEPAM                  | Temazepam                  |
| 904390140 | DIAZEPAM                   | Diazepam                   |
| 904390160 | DIAZEPAM                   | Diazepam                   |
| 904390161 | DIAZEPAM                   | Diazepam                   |
| 904390180 | DIAZEPAM                   | Diazepam                   |
| 904390240 | DIAZEPAM                   | Diazepam                   |
| 904390260 | DIAZEPAM                   | Diazepam                   |
| 904390261 | DIAZEPAM                   | Diazepam                   |
| 904390280 | DIAZEPAM                   | Diazepam                   |
| 904390340 | DIAZEPAM                   | Diazepam                   |
| 904390360 | DIAZEPAM                   | Diazepam                   |
| 904390361 | DIAZEPAM                   | Diazepam                   |
| 904390380 | DIAZEPAM                   | Diazepam                   |
| 904390410 | DIAZEPAM                   | Diazepam                   |
|           | CLORAZEPATE                | Clorazepate                |
| 904397040 | DIPOTASSIUM<br>CLORAZEPATE | Dipotassium<br>Clorazepate |
| 904397060 | DIPOTASSIUM<br>CLORAZEPATE | Dipotassium<br>Clorazepate |
| 904397061 | DIPOTASSIUM<br>CLORAZEPATE | Dipotassium<br>Clorazepate |
| 904397140 | DIPOTASSIUM<br>CLORAZEPATE | Dipotassium<br>Clorazepate |
| 904397160 | DIPOTASSIUM<br>CLORAZEPATE | Dipotassium<br>Clorazepate |
| 904397161 | DIPOTASSIUM<br>CLORAZEPATE | Dipotassium<br>Clorazepate |
| 904397240 | DIPOTASSIUM<br>CLORAZEPATE | Dipotassium<br>Clorazepate |
| 904397260 | DIPOTASSIUM<br>CLORAZEPATE | Dipotassium<br>Clorazepate |
| 904397360 | DIPOTASSIUM<br>CLORAZEPATE | Dipotassium<br>Clorazepate |
| 904397361 | DIPOTASSIUM<br>CLORAZEPATE | Dipotassium<br>Clorazepate |
| 904515960 | DIPOTASSIUM<br>CLORAZEPATE | Dipotassium<br>Clorazepate |
| 904516040 | DIPOTASSIUM<br>CLORAZEPATE | Dipotassium<br>Clorazepate |
| 904516060 | DIPOTASSIUM                | Dipotassium                |

|           |                  |                  |
|-----------|------------------|------------------|
| 904585861 | ALPRAZOLAM       | Alprazolam       |
| 904585961 | ALPRAZOLAM       | Alprazolam       |
| 904586061 | ALPRAZOLAM       | Alprazolam       |
| 904586161 | ALPRAZOLAM       | Alprazolam       |
| 904586261 | ALPRAZOLAM       | Alprazolam       |
| 904586361 | ALPRAZOLAM       | Alprazolam       |
| 904586461 | ALPRAZOLAM       | Alprazolam       |
| 904586561 | ALPRAZOLAM       | Alprazolam       |
| 904588061 | DIAZEPAM         | Diazepam         |
| 904588161 | DIAZEPAM         | Diazepam         |
| 904588561 | TEMAZEPAM        | Temazepam        |
| 904588661 | TEMAZEPAM        | Temazepam        |
| 904598061 | LORAZEPAM        | Lorazepam        |
| 904598161 | LORAZEPAM        | Lorazepam        |
| 904598261 | LORAZEPAM        | Lorazepam        |
| 904600740 | LORAZEPAM        | Lorazepam        |
| 904600760 | LORAZEPAM        | Lorazepam        |
| 904600761 | LORAZEPAM        | Lorazepam        |
| 904600860 | LORAZEPAM        | Lorazepam        |
| 904600861 | LORAZEPAM        | Lorazepam        |
| 904600960 | LORAZEPAM        | Lorazepam        |
| 904600961 | LORAZEPAM        | Lorazepam        |
| 904643604 | TEMAZEPAM        | Temazepam        |
| 904643660 | TEMAZEPAM        | Temazepam        |
| 904779140 | ALPRAZOLAM       | Alprazolam       |
| 904779160 | ALPRAZOLAM       | Alprazolam       |
| 904779240 | ALPRAZOLAM       | Alprazolam       |
| 904779260 | ALPRAZOLAM       | Alprazolam       |
| 904779340 | ALPRAZOLAM       | Alprazolam       |
| 904779360 | ALPRAZOLAM       | Alprazolam       |
| 904791840 | ALPRAZOLAM       | Alprazolam       |
| 904791860 | ALPRAZOLAM       | Alprazolam       |
| 904791940 | ALPRAZOLAM       | Alprazolam       |
| 904791960 | ALPRAZOLAM       | Alprazolam       |
| 904792040 | ALPRAZOLAM       | Alprazolam       |
| 904792060 | ALPRAZOLAM       | Alprazolam       |
|           |                  | Chlordiazepoxide |
| 917015410 | REPOSANS-10      | Hydrochloride    |
|           | CHLORDIAZEPOXIDE | Chlordiazepoxide |
| 948535601 | HCL              | Hydrochloride    |
|           | CHLORDIAZEPOXIDE | Chlordiazepoxide |
| 948535610 | HCL              | Hydrochloride    |
|           | CHLORDIAZEPOXIDE | Chlordiazepoxide |
| 948535801 | HCL              | Hydrochloride    |

|             |                         |                                   |
|-------------|-------------------------|-----------------------------------|
| 948535805   | CHLORDIAZEPOXIDE<br>HCL | Chlordiazepoxide<br>Hydrochloride |
| 948535810   | CHLORDIAZEPOXIDE<br>HCL | Chlordiazepoxide<br>Hydrochloride |
| 948536001   | CHLORDIAZEPOXIDE<br>HCL | Chlordiazepoxide<br>Hydrochloride |
| 948536010   | CHLORDIAZEPOXIDE<br>HCL | Chlordiazepoxide<br>Hydrochloride |
| 10019000444 | DIAZEPAM                | Diazepam                          |
| 10019000542 | DIAZEPAM                | Diazepam                          |
| 10019000567 | DIAZEPAM                | Diazepam                          |
| 10019002701 | MIDAZOLAM HCL           | Midazolam<br>Hydrochloride        |
| 10019002702 | MIDAZOLAM HCL           | Midazolam<br>Hydrochloride        |
| 10019002703 | MIDAZOLAM HCL           | Midazolam<br>Hydrochloride        |
| 10019002704 | MIDAZOLAM HCL           | Midazolam<br>Hydrochloride        |
| 10019002705 | MIDAZOLAM HCL           | Midazolam<br>Hydrochloride        |
| 10019002706 | MIDAZOLAM HCL           | Midazolam<br>Hydrochloride        |
| 10019002707 | MIDAZOLAM HCL           | Midazolam<br>Hydrochloride        |
| 10019002708 | MIDAZOLAM HCL           | Midazolam<br>Hydrochloride        |
| 10019002709 | MIDAZOLAM HCL           | Midazolam<br>Hydrochloride        |
| 10019002710 | MIDAZOLAM HCL           | Midazolam<br>Hydrochloride        |
| 10019002729 | MIDAZOLAM HCL           | Midazolam<br>Hydrochloride        |
| 10019002736 | MIDAZOLAM HCL           | Midazolam<br>Hydrochloride        |
| 10019002737 | MIDAZOLAM HCL           | Midazolam<br>Hydrochloride        |
| 10019002739 | MIDAZOLAM HCL           | Midazolam<br>Hydrochloride        |
| 10019002759 | MIDAZOLAM HCL           | Midazolam<br>Hydrochloride        |
| 10019002764 | MIDAZOLAM HCL           | Midazolam<br>Hydrochloride        |
| 10019002801 | MIDAZOLAM HCL           | Midazolam<br>Hydrochloride        |
| 10019002802 | MIDAZOLAM HCL           | Midazolam<br>Hydrochloride        |

|             |                    |                            |
|-------------|--------------------|----------------------------|
| 10019002803 | MIDAZOLAM HCL      | Midazolam<br>Hydrochloride |
| 10019002804 | MIDAZOLAM HCL      | Midazolam<br>Hydrochloride |
| 10019002805 | MIDAZOLAM HCL      | Midazolam<br>Hydrochloride |
| 10019002810 | MIDAZOLAM HCL      | Midazolam<br>Hydrochloride |
| 10019002836 | MIDAZOLAM HCL      | Midazolam<br>Hydrochloride |
| 10019002837 | MIDAZOLAM HCL      | Midazolam<br>Hydrochloride |
| 10019002839 | MIDAZOLAM HCL      | Midazolam<br>Hydrochloride |
| 10019002859 | MIDAZOLAM HCL      | Midazolam<br>Hydrochloride |
| 10019010201 | LORAZEPAM          | Lorazepam                  |
| 10019010210 | LORAZEPAM          | Lorazepam                  |
| 10019010237 | LORAZEPAM          | Lorazepam                  |
| 10019010239 | LORAZEPAM          | Lorazepam                  |
| 10019010246 | ATIVAN             | Lorazepam                  |
| 10019010247 | ATIVAN             | Lorazepam                  |
| 10019010301 | LORAZEPAM          | Lorazepam                  |
| 10019010310 | LORAZEPAM          | Lorazepam                  |
| 10019010337 | LORAZEPAM          | Lorazepam                  |
| 10019010339 | LORAZEPAM          | Lorazepam                  |
| 10019010346 | ATIVAN             | Lorazepam                  |
| 10019010347 | ATIVAN             | Lorazepam                  |
| 10019010501 | LORAZEPAM NOVAPLUS | Lorazepam                  |
| 10019010502 | LORAZEPAM NOVAPLUS | Lorazepam                  |
| 10019010544 | LORAZEPAM NOVAPLUS | Lorazepam                  |
| 10019010571 | LORAZEPAM NOVAPLUS | Lorazepam                  |
| 10019010601 | LORAZEPAM NOVAPLUS | Lorazepam                  |
| 10019010602 | LORAZEPAM NOVAPLUS | Lorazepam                  |
| 10019010644 | LORAZEPAM NOVAPLUS | Lorazepam                  |
| 10019010671 | LORAZEPAM NOVAPLUS | Lorazepam<br>Midazolam     |
| 10019012708 | MIDAZOLAM HCL      | Midazolam<br>Hydrochloride |
| 10019012732 | MIDAZOLAM          | Midazolam<br>Hydrochloride |
| 10019085013 | DIZAC              | Diazepam                   |
| 10019085021 | DIZAC              | Diazepam                   |
| 10544002930 | ALPRAZOLAM         | Alprazolam                 |
| 10544005430 | ALPRAZOLAM         | Alprazolam                 |
| 10544010430 | ALPRAZOLAM         | Alprazolam                 |

|             |                            |                             |
|-------------|----------------------------|-----------------------------|
| 10544010630 | ALPRAZOLAM                 | Alprazolam                  |
| 10544010730 | ALPRAZOLAM                 | Alprazolam                  |
| 10544015530 | ALPRAZOLAM                 | Alprazolam                  |
| 10544015560 | ALPRAZOLAM                 | Alprazolam                  |
| 10544015590 | ALPRAZOLAM                 | Alprazolam                  |
| 10544016130 | DIAZEPAM                   | Diazepam                    |
| 10544016160 | DIAZEPAM                   | Diazepam                    |
| 10544024430 | LORAZEPAM                  | Lorazepam                   |
| 10544030930 | DIAZEPAM                   | Diazepam                    |
| 10544034730 | TRIAZOLAM                  | Triazolam                   |
| 10544035430 | DIAZEPAM                   | Diazepam                    |
| 10544035460 | DIAZEPAM                   | Diazepam                    |
| 10544035830 | LORAZEPAM                  | Lorazepam                   |
| 10544036130 | TEMAZEPAM                  | Temazepam                   |
| 10544040330 | DIAZEPAM                   | Diazepam                    |
| 11098010101 | LORAZEPAM                  | Lorazepam                   |
| 11098010201 | LORAZEPAM                  | Lorazepam                   |
| 11704060001 | DIAZEPAM                   | Diazepam                    |
| 11845015001 | LORAZEPAM                  | Lorazepam                   |
| 11845015003 | LORAZEPAM                  | Lorazepam                   |
| 11845015101 | LORAZEPAM                  | Lorazepam                   |
| 11845015103 | LORAZEPAM                  | Lorazepam                   |
| 11845015104 | LORAZEPAM                  | Lorazepam                   |
| 11845015201 | LORAZEPAM                  | Lorazepam                   |
| 11845015203 | LORAZEPAM                  | Lorazepam                   |
| 11845015204 | LORAZEPAM                  | Lorazepam                   |
| 11845020101 | FLURAZEPAM HCL             | Flurazepam<br>Hydrochloride |
| 11845020103 | FLURAZEPAM HCL             | Flurazepam<br>Hydrochloride |
| 11845020201 | FLURAZEPAM HCL             | Flurazepam<br>Hydrochloride |
| 11845020203 | FLURAZEPAM HCL             | Flurazepam<br>Hydrochloride |
| 11845034401 | TEMAZEPAM                  | Temazepam                   |
| 11845034403 | TEMAZEPAM                  | Temazepam                   |
| 11845034501 | TEMAZEPAM                  | Temazepam                   |
| 11845034503 | TEMAZEPAM                  | Temazepam                   |
| 11845036301 | CLORAZEPATE                | Clorazepate                 |
| 11845036301 | DIPOTASSIUM<br>CLORAZEPATE | Dipotassium<br>Clorazepate  |
| 11845036303 | DIPOTASSIUM<br>CLORAZEPATE | Dipotassium<br>Clorazepate  |
| 11845036401 | DIPOTASSIUM                | Dipotassium                 |

|             |                            |                             |
|-------------|----------------------------|-----------------------------|
|             | CLORAZEPATE                | Clorazepate                 |
| 11845036403 | DIPOTASSIUM<br>CLORAZEPATE | Dipotassium<br>Clorazepate  |
| 11845036501 | DIPOTASSIUM                | Dipotassium                 |
| 11845036901 | DIAZEPAM                   | Diazepam                    |
| 11845036903 | DIAZEPAM                   | Diazepam                    |
| 11845036904 | DIAZEPAM                   | Diazepam                    |
| 11845037001 | DIAZEPAM                   | Diazepam                    |
| 11845037003 | DIAZEPAM                   | Diazepam                    |
| 11845037004 | DIAZEPAM                   | Diazepam                    |
| 11845037101 | DIAZEPAM                   | Diazepam                    |
| 11845037103 | DIAZEPAM                   | Diazepam                    |
| 11845037104 | DIAZEPAM                   | Diazepam                    |
|             | CHLORDIAZEPOXIDE           | Chlordiazepoxide            |
| 12071010305 | HCL                        | Hydrochloride               |
|             | CHLORDIAZEPOXIDE           | Chlordiazepoxide            |
| 12071010401 | HCL                        | Hydrochloride               |
|             | CHLORDIAZEPOXIDE           | Chlordiazepoxide            |
| 12071010405 | HCL                        | Hydrochloride               |
|             | CHLORDIAZEPOXIDE           | Chlordiazepoxide            |
| 12071010499 | HCL                        | Hydrochloride               |
|             | CHLORDIAZEPOXIDE           | Chlordiazepoxide            |
| 12071010505 | HCL                        | Hydrochloride               |
|             | CHLORDIAZEPOXIDE           | Chlordiazepoxide            |
| 12071010599 | HCL                        | Hydrochloride               |
| 12071045205 | DIAZEPAM                   | Diazepam                    |
| 12071045310 | DIAZEPAM                   | Diazepam                    |
| 12071045401 | DIAZEPAM                   | Diazepam                    |
| 12071045405 | DIAZEPAM                   | Diazepam                    |
|             |                            | Flurazepam                  |
| 12071045601 | FLURAZEPAM HCL             | Hydrochloride<br>Flurazepam |
| 12071045701 | FLURAZEPAM HCL             | Hydrochloride<br>Flurazepam |
| 12071045705 | FLURAZEPAM HCL             | Hydrochloride               |
| 12071045801 | LORAZEPAM                  | Lorazepam                   |
| 12071045805 | LORAZEPAM                  | Lorazepam                   |
| 12071045901 | LORAZEPAM                  | Lorazepam                   |
| 12071045905 | LORAZEPAM                  | Lorazepam                   |
| 12071046001 | LORAZEPAM                  | Lorazepam                   |
| 12071046005 | LORAZEPAM                  | Lorazepam                   |
| 12071046401 | TEMAZEPAM                  | Temazepam                   |
| 12071046405 | TEMAZEPAM                  | Temazepam                   |
| 12071046501 | TEMAZEPAM                  | Temazepam                   |
| 12071046505 | TEMAZEPAM                  | Temazepam                   |

|             |            |                                   |
|-------------|------------|-----------------------------------|
| 12280000200 | ATIVAN     | Lorazepam<br>Flurazepam           |
| 12280000600 | DALMANE    | Hydrochloride                     |
| 12280002515 | ESTAZOLAM  | Estazolam                         |
| 12280002530 | ESTAZOLAM  | Estazolam                         |
| 12280004000 | RESTORIL   | Temazepam                         |
| 12280005600 | XANAX      | Alprazolam                        |
| 12280005660 | XANAX      | Alprazolam                        |
| 12280016130 | RESTORIL   | Temazepam                         |
| 12280021900 | DIAZEPAM   | Diazepam                          |
| 12280028660 | XANAX XR   | Alprazolam<br>Chlordiazepoxide    |
| 12535019012 | CHLOR POX  | Hydrochloride<br>Chlordiazepoxide |
| 12535019110 | CHLOR POX  | Hydrochloride<br>Chlordiazepoxide |
| 12535019210 | CHLOR POX  | Hydrochloride                     |
| 15330024901 | TRIAZOLAM  | Triazolam                         |
| 15330024905 | TRIAZOLAM  | Triazolam                         |
| 15330024981 | TRIAZOLAM  | Triazolam                         |
| 15330025001 | TRIAZOLAM  | Triazolam                         |
| 15330025005 | TRIAZOLAM  | Triazolam                         |
| 15330025081 | TRIAZOLAM  | Triazolam                         |
| 16590000515 | ALPRAZOLAM | Alprazolam                        |
| 16590000520 | ALPRAZOLAM | Alprazolam                        |
| 16590000530 | ALPRAZOLAM | Alprazolam                        |
| 16590000545 | ALPRAZOLAM | Alprazolam                        |
| 16590000560 | ALPRAZOLAM | Alprazolam                        |
| 16590000572 | ALPRAZOLAM | Alprazolam                        |
| 16590000590 | ALPRAZOLAM | Alprazolam                        |
| 16590000610 | ALPRAZOLAM | Alprazolam                        |
| 16590000615 | ALPRAZOLAM | Alprazolam                        |
| 16590000628 | ALPRAZOLAM | Alprazolam                        |
| 16590000630 | ALPRAZOLAM | Alprazolam                        |
| 16590000660 | ALPRAZOLAM | Alprazolam                        |
| 16590000672 | ALPRAZOLAM | Alprazolam                        |
| 16590000682 | ALPRAZOLAM | Alprazolam                        |
| 16590000690 | ALPRAZOLAM | Alprazolam                        |
| 16590006930 | DIAZEPAM   | Diazepam                          |
| 16590006960 | DIAZEPAM   | Diazepam                          |
| 16590006990 | DIAZEPAM   | Diazepam                          |
| 16590007001 | DIAZEPAM   | Diazepam                          |
| 16590007002 | DIAZEPAM   | Diazepam                          |
| 16590007003 | DIAZEPAM   | Diazepam                          |

|             |           |           |
|-------------|-----------|-----------|
| 16590007006 | DIAZEPAM  | Diazepam  |
| 16590007010 | DIAZEPAM  | Diazepam  |
| 16590007015 | DIAZEPAM  | Diazepam  |
| 16590007020 | DIAZEPAM  | Diazepam  |
| 16590007030 | DIAZEPAM  | Diazepam  |
| 16590007045 | DIAZEPAM  | Diazepam  |
| 16590007060 | DIAZEPAM  | Diazepam  |
| 16590007071 | DIAZEPAM  | Diazepam  |
| 16590007072 | DIAZEPAM  | Diazepam  |
| 16590007075 | DIAZEPAM  | Diazepam  |
| 16590007090 | DIAZEPAM  | Diazepam  |
| 16590007102 | DIAZEPAM  | Diazepam  |
| 16590007104 | DIAZEPAM  | Diazepam  |
| 16590007110 | DIAZEPAM  | Diazepam  |
| 16590007115 | DIAZEPAM  | Diazepam  |
| 16590007120 | DIAZEPAM  | Diazepam  |
| 16590007128 | DIAZEPAM  | Diazepam  |
| 16590007130 | DIAZEPAM  | Diazepam  |
| 16590007140 | DIAZEPAM  | Diazepam  |
| 16590007145 | DIAZEPAM  | Diazepam  |
| 16590007156 | DIAZEPAM  | Diazepam  |
| 16590007160 | DIAZEPAM  | Diazepam  |
| 16590007162 | DIAZEPAM  | Diazepam  |
| 16590007171 | DIAZEPAM  | Diazepam  |
| 16590007172 | DIAZEPAM  | Diazepam  |
| 16590007175 | DIAZEPAM  | Diazepam  |
| 16590007190 | DIAZEPAM  | Diazepam  |
| 16590014315 | LORAZEPAM | Lorazepam |
| 16590014330 | LORAZEPAM | Lorazepam |
| 16590014360 | LORAZEPAM | Lorazepam |
| 16590021415 | TEMAZEPAM | Temazepam |
| 16590021428 | TEMAZEPAM | Temazepam |
| 16590021430 | TEMAZEPAM | Temazepam |
| 16590021445 | TEMAZEPAM | Temazepam |
| 16590021460 | TEMAZEPAM | Temazepam |
| 16590021490 | TEMAZEPAM | Temazepam |
| 16590023620 | TRIAZOLAM | Triazolam |
| 16590023628 | TRIAZOLAM | Triazolam |
| 16590023630 | TRIAZOLAM | Triazolam |
| 16590023640 | TRIAZOLAM | Triazolam |
| 16590023660 | TRIAZOLAM | Triazolam |
| 16590023690 | TRIAZOLAM | Triazolam |
| 16590030490 | OXAZEPAM  | Oxazepam  |

|             |                  |                  |
|-------------|------------------|------------------|
| 16590043828 | TEMAZEPAM        | Temazepam        |
| 16590043830 | TEMAZEPAM        | Temazepam        |
| 16590043860 | TEMAZEPAM        | Temazepam        |
| 16590043872 | TEMAZEPAM        | Temazepam        |
| 16590043890 | TEMAZEPAM        | Temazepam        |
| 16590044714 | ALPRAZOLAM       | Alprazolam       |
| 16590044720 | ALPRAZOLAM       | Alprazolam       |
| 16590044730 | ALPRAZOLAM       | Alprazolam       |
| 16590044760 | ALPRAZOLAM       | Alprazolam       |
| 16590044771 | ALPRAZOLAM       | Alprazolam       |
| 16590044790 | ALPRAZOLAM       | Alprazolam       |
| 16590049930 | LORAZEPAM        | Lorazepam        |
| 16590049960 | LORAZEPAM        | Lorazepam        |
| 16590049972 | LORAZEPAM        | Lorazepam        |
| 16590049990 | LORAZEPAM        | Lorazepam        |
| 16590057130 | ALPRAZOLAM       | Alprazolam       |
| 16590057160 | ALPRAZOLAM       | Alprazolam       |
| 16590057172 | ALPRAZOLAM       | Alprazolam       |
| 16590057190 | ALPRAZOLAM       | Alprazolam       |
| 16590057615 | ALPRAZOLAM       | Alprazolam       |
| 16590057630 | ALPRAZOLAM       | Alprazolam       |
| 16590057660 | ALPRAZOLAM       | Alprazolam       |
| 16590057672 | ALPRAZOLAM       | Alprazolam       |
| 16590057690 | ALPRAZOLAM       | Alprazolam       |
| 16590058405 | LORAZEPAM        | Lorazepam        |
| 16590058415 | LORAZEPAM        | Lorazepam        |
| 16590058430 | LORAZEPAM        | Lorazepam        |
| 16590058460 | LORAZEPAM        | Lorazepam        |
| 16590058472 | LORAZEPAM        | Lorazepam        |
| 16590058482 | LORAZEPAM        | Lorazepam        |
| 16590058490 | LORAZEPAM        | Lorazepam        |
| 16590058830 | ALPRAZOLAM       | Alprazolam       |
| 16590058860 | ALPRAZOLAM       | Alprazolam       |
| 16590058872 | ALPRAZOLAM       | Alprazolam       |
| 16590058890 | ALPRAZOLAM       | Alprazolam       |
| 16590068230 | XANAX XR         | Alprazolam       |
|             | CHLORDIAZEPOXIDE | Chlordiazepoxide |
| 16590071110 | HCL              | Hydrochloride    |
|             | CHLORDIAZEPOXIDE | Chlordiazepoxide |
| 16590071130 | HCL              | Hydrochloride    |
|             | CHLORDIAZEPOXIDE | Chlordiazepoxide |
| 16590071160 | HCL              | Hydrochloride    |
|             | CHLORDIAZEPOXIDE | Chlordiazepoxide |
| 16590071190 | HCL              | Hydrochloride    |

|             |                  |                  |
|-------------|------------------|------------------|
| 16590074256 | VALIUM           | Diazepam         |
| 16590074430 | TEMAZEPAM        | Temazepam        |
|             | CLORAZEPATE      | Clorazepate      |
| 16590075960 | DIPOTASSIUM      | Dipotassium      |
|             | CLORAZEPATE      | Clorazepate      |
| 16590075982 | DIPOTASSIUM      | Dipotassium      |
|             | CLORAZEPATE      | Clorazepate      |
| 16590075986 | DIPOTASSIUM      | Dipotassium      |
|             | CLORAZEPATE      | Clorazepate      |
| 16590075990 | DIPOTASSIUM      | Dipotassium      |
|             | CHLORDIAZEPOXIDE | Chlordiazepoxide |
| 16590076690 | HCL              | Hydrochloride    |
| 16590081372 | ATIVAN           | Lorazepam        |
|             | CHLORDIAZEPOXIDE | Chlordiazepoxide |
| 17022214906 | HCL              | Hydrochloride    |
|             | CHLORDIAZEPOXIDE | Chlordiazepoxide |
| 17022215106 | HCL              | Hydrochloride    |
| 17236033801 | TEMAZEPAM        | Temazepam        |
| 17236033805 | TEMAZEPAM        | Temazepam        |
| 17236033811 | TEMAZEPAM        | Temazepam        |
| 17236033901 | TEMAZEPAM        | Temazepam        |
| 17236033905 | TEMAZEPAM        | Temazepam        |
| 17236034001 | DIAZEPAM         | Diazepam         |
| 17236034010 | DIAZEPAM         | Diazepam         |
| 17236034101 | DIAZEPAM         | Diazepam         |
| 17236034105 | DIAZEPAM         | Diazepam         |
| 17236034110 | DIAZEPAM         | Diazepam         |
| 17236034199 | DIAZEPAM         | Diazepam         |
| 17236034201 | DIAZEPAM         | Diazepam         |
| 17236034205 | DIAZEPAM         | Diazepam         |
| 17236034210 | DIAZEPAM         | Diazepam         |
|             |                  | Flurazepam       |
| 17236034501 | FLURAZEPAM HCL   | Hydrochloride    |
|             |                  | Flurazepam       |
| 17236034505 | FLURAZEPAM HCL   | Hydrochloride    |
|             |                  | Flurazepam       |
| 17236034511 | FLURAZEPAM HCL   | Hydrochloride    |
|             |                  | Flurazepam       |
| 17236034601 | FLURAZEPAM HCL   | Hydrochloride    |
|             |                  | Flurazepam       |
| 17236034605 | FLURAZEPAM HCL   | Hydrochloride    |
| 17236036001 | LORAZEPAM        | Lorazepam        |
| 17236036005 | LORAZEPAM        | Lorazepam        |
| 17236036099 | LORAZEPAM        | Lorazepam        |
| 17236036101 | LORAZEPAM        | Lorazepam        |

|             |                  |                  |
|-------------|------------------|------------------|
| 17236036105 | LORAZEPAM        | Lorazepam        |
| 17236036110 | LORAZEPAM        | Lorazepam        |
| 17236036199 | LORAZEPAM        | Lorazepam        |
| 17236036201 | LORAZEPAM        | Lorazepam        |
| 17236036205 | LORAZEPAM        | Lorazepam        |
| 17236036210 | LORAZEPAM        | Lorazepam        |
| 17236036299 | LORAZEPAM        | Lorazepam        |
| 17236047301 | OXAZEPAM         | Oxazepam         |
| 17236047305 | OXAZEPAM         | Oxazepam         |
| 17236047399 | OXAZEPAM         | Oxazepam         |
| 17236047401 | OXAZEPAM         | Oxazepam         |
| 17236047405 | OXAZEPAM         | Oxazepam         |
| 17236047499 | OXAZEPAM         | Oxazepam         |
| 17236047501 | OXAZEPAM         | Oxazepam         |
| 17236047505 | OXAZEPAM         | Oxazepam         |
| 17236047599 | OXAZEPAM         | Oxazepam         |
|             | CHLORDIAZEPOXIDE | Chlordiazepoxide |
| 17236056201 | HCL              | Hydrochloride    |
|             | CHLORDIAZEPOXIDE | Chlordiazepoxide |
| 17236056205 | HCL              | Hydrochloride    |
|             | CHLORDIAZEPOXIDE | Chlordiazepoxide |
| 17236056210 | HCL              | Hydrochloride    |
|             | CHLORDIAZEPOXIDE | Chlordiazepoxide |
| 17236056401 | HCL              | Hydrochloride    |
|             | CHLORDIAZEPOXIDE | Chlordiazepoxide |
| 17236056405 | HCL              | Hydrochloride    |
|             | CHLORDIAZEPOXIDE | Chlordiazepoxide |
| 17236056410 | HCL              | Hydrochloride    |
|             | CHLORDIAZEPOXIDE | Chlordiazepoxide |
| 17236056601 | HCL              | Hydrochloride    |
|             | CHLORDIAZEPOXIDE | Chlordiazepoxide |
| 17236056605 | HCL              | Hydrochloride    |
|             | CHLORDIAZEPOXIDE | Chlordiazepoxide |
| 17236056610 | HCL              | Hydrochloride    |
|             | CLORAZEPATE      | Clorazepate      |
| 17236067601 | DIPOTASSIUM      | Dipotassium      |
|             | CLORAZEPATE      | Clorazepate      |
| 17236067605 | DIPOTASSIUM      | Dipotassium      |
|             | CLORAZEPATE      | Clorazepate      |
| 17236067701 | DIPOTASSIUM      | Dipotassium      |
|             | CLORAZEPATE      | Clorazepate      |
| 17236067705 | DIPOTASSIUM      | Dipotassium      |
|             | CLORAZEPATE      | Clorazepate      |
| 17236067801 | DIPOTASSIUM      | Dipotassium      |
|             | CLORAZEPATE      | Clorazepate      |
| 17236067805 | DIPOTASSIUM      | Dipotassium      |

|             |               |                            |
|-------------|---------------|----------------------------|
| 17478004001 | LORAZEPAM     | Lorazepam<br>Midazolam     |
| 17478052302 | MIDAZOLAM HCL | Hydrochloride<br>Midazolam |
| 17478052305 | MIDAZOLAM HCL | Hydrochloride<br>Midazolam |
| 17478052310 | MIDAZOLAM HCL | Hydrochloride<br>Midazolam |
| 17478052355 | MIDAZOLAM HCL | Hydrochloride<br>Midazolam |
| 17478052401 | MIDAZOLAM HCL | Hydrochloride<br>Midazolam |
| 17478052402 | MIDAZOLAM HCL | Hydrochloride<br>Midazolam |
| 17478052405 | MIDAZOLAM HCL | Hydrochloride<br>Midazolam |
| 17478052410 | MIDAZOLAM HCL | Hydrochloride<br>Midazolam |
| 17856020502 | MIDAZOLAM HCL | Hydrochloride<br>Midazolam |
| 17856020505 | MIDAZOLAM HCL | Hydrochloride<br>Midazolam |
| 17856356602 | MIDAZOLAM HCL | Hydrochloride              |
| 18837000130 | ALPRAZOLAM    | Alprazolam                 |
| 18837000160 | ALPRAZOLAM    | Alprazolam                 |
| 18837000190 | ALPRAZOLAM    | Alprazolam                 |
| 18837000230 | ALPRAZOLAM    | Alprazolam                 |
| 18837000260 | ALPRAZOLAM    | Alprazolam                 |
| 18837000290 | ALPRAZOLAM    | Alprazolam                 |
| 18837000298 | ALPRAZOLAM    | Alprazolam                 |
| 18837000360 | ALPRAZOLAM    | Alprazolam                 |
| 18837000390 | ALPRAZOLAM    | Alprazolam                 |
| 18837000398 | ALPRAZOLAM    | Alprazolam                 |
| 18837003830 | DIAZEPAM      | Diazepam                   |
| 18837003860 | DIAZEPAM      | Diazepam                   |
| 18837003890 | DIAZEPAM      | Diazepam                   |
| 18837003898 | DIAZEPAM      | Diazepam                   |
| 18837003899 | DIAZEPAM      | Diazepam                   |
| 18837003903 | DIAZEPAM      | Diazepam                   |
| 18837003930 | DIAZEPAM      | Diazepam                   |
| 18837003960 | DIAZEPAM      | Diazepam                   |
| 18837003990 | DIAZEPAM      | Diazepam                   |
| 18837007830 | LORAZEPAM     | Lorazepam                  |
| 18837010898 | NIRAVAM       | Alprazolam                 |
| 18837010920 | NIRAVAM       | Alprazolam                 |

|             |                  |                  |
|-------------|------------------|------------------|
| 18837015030 | TEMAZEPAM        | Temazepam        |
| 18837015130 | TEMAZEPAM        | Temazepam        |
| 18837015960 | TRANXENE         | Clorazepate      |
| 18837017060 | VALIUM           | Dipotassium      |
| 18837017730 | XANAX            | Diazepam         |
| 18837017760 | XANAX            | Alprazolam       |
| 18837017830 | XANAX            | Alprazolam       |
| 18837017860 | XANAX            | Alprazolam       |
| 18837017898 | XANAX            | Alprazolam       |
| 18837017930 | XANAX XR         | Alprazolam       |
| 18837027960 | LORAZEPAM        | Alprazolam       |
| 18837028130 | LORAZEPAM        | Lorazepam        |
| 18837028160 | LORAZEPAM        | Lorazepam        |
| 18837031290 | ALPRAZOLAM       | Lorazepam        |
|             | CHLORDIAZEPOXIDE | Alprazolam       |
| 18837032860 | HCL              | Chlordiazepoxide |
| 18837034430 | DIAZEPAM         | Hydrochloride    |
| 18837035830 | TRIAZOLAM        | Diazepam         |
| 18860032101 | NIRAVAM          | Triazolam        |
| 18860032201 | NIRAVAM          | Alprazolam       |
| 18860032301 | NIRAVAM          | Alprazolam       |
| 18860032401 | NIRAVAM          | Alprazolam       |
| 21695022030 | ESTAZOLAM        | Alprazolam       |
| 21695023800 | LORAZEPAM        | Estazolam        |
| 21695023804 | LORAZEPAM        | Lorazepam        |
| 21695023815 | LORAZEPAM        | Lorazepam        |
| 21695023830 | LORAZEPAM        | Lorazepam        |
| 21695023860 | LORAZEPAM        | Lorazepam        |
| 21695023890 | LORAZEPAM        | Lorazepam        |
| 21695023900 | LORAZEPAM        | Lorazepam        |
| 21695023903 | LORAZEPAM        | Lorazepam        |
| 21695023910 | LORAZEPAM        | Lorazepam        |
| 21695023915 | LORAZEPAM        | Lorazepam        |
| 21695023930 | LORAZEPAM        | Lorazepam        |
| 21695023960 | LORAZEPAM        | Lorazepam        |
| 21695023990 | LORAZEPAM        | Lorazepam        |
| 21695024003 | LORAZEPAM        | Lorazepam        |
| 21695024030 | LORAZEPAM        | Lorazepam        |
| 21695024060 | LORAZEPAM        | Lorazepam        |
| 21695024720 | ALPRAZOLAM       | Alprazolam       |
| 21695024730 | ALPRAZOLAM       | Alprazolam       |
| 21695024760 | ALPRAZOLAM       | Alprazolam       |

|             |            |            |
|-------------|------------|------------|
| 21695024790 | ALPRAZOLAM | Alprazolam |
| 21695024800 | ALPRAZOLAM | Alprazolam |
| 21695024815 | ALPRAZOLAM | Alprazolam |
| 21695024820 | ALPRAZOLAM | Alprazolam |
| 21695024830 | ALPRAZOLAM | Alprazolam |
| 21695024860 | ALPRAZOLAM | Alprazolam |
| 21695024920 | ALPRAZOLAM | Alprazolam |
| 21695024930 | ALPRAZOLAM | Alprazolam |
| 21695024940 | ALPRAZOLAM | Alprazolam |
| 21695024945 | ALPRAZOLAM | Alprazolam |
| 21695024960 | ALPRAZOLAM | Alprazolam |
| 21695024990 | ALPRAZOLAM | Alprazolam |
| 21695025030 | ALPRAZOLAM | Alprazolam |
| 21695025040 | ALPRAZOLAM | Alprazolam |
| 21695025060 | ALPRAZOLAM | Alprazolam |
| 21695025090 | ALPRAZOLAM | Alprazolam |
| 21695026330 | DIAZEPAM   | Diazepam   |
| 21695026390 | DIAZEPAM   | Diazepam   |
| 21695026402 | DIAZEPAM   | Diazepam   |
| 21695026404 | DIAZEPAM   | Diazepam   |
| 21695026410 | DIAZEPAM   | Diazepam   |
| 21695026412 | DIAZEPAM   | Diazepam   |
| 21695026415 | DIAZEPAM   | Diazepam   |
| 21695026420 | DIAZEPAM   | Diazepam   |
| 21695026430 | DIAZEPAM   | Diazepam   |
| 21695026445 | DIAZEPAM   | Diazepam   |
| 21695026460 | DIAZEPAM   | Diazepam   |
| 21695026490 | DIAZEPAM   | Diazepam   |
| 21695026503 | DIAZEPAM   | Diazepam   |
| 21695026505 | DIAZEPAM   | Diazepam   |
| 21695026515 | DIAZEPAM   | Diazepam   |
| 21695026520 | DIAZEPAM   | Diazepam   |
| 21695026530 | DIAZEPAM   | Diazepam   |
| 21695026540 | DIAZEPAM   | Diazepam   |
| 21695026545 | DIAZEPAM   | Diazepam   |
| 21695026560 | DIAZEPAM   | Diazepam   |
| 21695026590 | DIAZEPAM   | Diazepam   |
| 21695028230 | TEMAZEPAM  | Temazepam  |
| 21695028260 | TEMAZEPAM  | Temazepam  |
| 21695028278 | TEMAZEPAM  | Temazepam  |
| 21695028304 | TEMAZEPAM  | Temazepam  |
| 21695028330 | TEMAZEPAM  | Temazepam  |
| 21695028390 | TEMAZEPAM  | Temazepam  |

|             |                |                             |
|-------------|----------------|-----------------------------|
| 21695028400 | TRIAZOLAM      | Triazolam                   |
| 21695028410 | TRIAZOLAM      | Triazolam                   |
| 21695030310 | TRIAZOLAM      | Triazolam                   |
| 21695030330 | TRIAZOLAM      | Triazolam                   |
| 21695030360 | TRIAZOLAM      | Triazolam                   |
| 21695036330 | FLURAZEPAM HCL | Flurazepam<br>Hydrochloride |
| 21695043356 | CLORAZEPATE    | Clorazepate<br>Dipotassium  |
| 21695043360 | CLORAZEPATE    | Clorazepate<br>Dipotassium  |
| 21695043390 | CLORAZEPATE    | Clorazepate<br>Dipotassium  |
| 21695043460 | DIPOTASSIUM    | Dipotassium                 |
| 21695060260 | ALPRAZOLAM     | Alprazolam                  |
| 21695060360 | ALPRAZOLAM     | Alprazolam                  |
| 21695060460 | ALPRAZOLAM     | Alprazolam                  |
| 21695060560 | ALPRAZOLAM     | Alprazolam                  |
| 21695088910 | DIAZEPAM       | Diazepam                    |
| 23490042803 | DIAZEPAM       | Diazepam                    |
| 23490042806 | DIAZEPAM       | Diazepam                    |
| 23490503201 | ALPRAZOLAM     | Alprazolam                  |
| 23490503202 | ALPRAZOLAM     | Alprazolam                  |
| 23490503204 | ALPRAZOLAM     | Alprazolam                  |
| 23490503205 | ALPRAZOLAM     | Alprazolam                  |
| 23490503206 | ALPRAZOLAM     | Alprazolam                  |
| 23490503207 | ALPRAZOLAM     | Alprazolam                  |
| 23490503301 | ALPRAZOLAM     | Alprazolam                  |
| 23490503302 | ALPRAZOLAM     | Alprazolam                  |
| 23490503303 | ALPRAZOLAM     | Alprazolam                  |
| 23490503304 | ALPRAZOLAM     | Alprazolam                  |
| 23490503305 | ALPRAZOLAM     | Alprazolam                  |
| 23490503401 | ALPRAZOLAM     | Alprazolam                  |
| 23490503402 | ALPRAZOLAM     | Alprazolam                  |
| 23490503403 | ALPRAZOLAM     | Alprazolam                  |
| 23490503404 | ALPRAZOLAM     | Alprazolam                  |
| 23490503503 | ALPRAZOLAM     | Alprazolam                  |
| 23490503506 | ALPRAZOLAM     | Alprazolam                  |
| 23490503508 | ALPRAZOLAM     | Alprazolam                  |
| 23490503509 | ALPRAZOLAM     | Alprazolam                  |
| 23490526103 | CLORAZEPATE    | Clorazepate                 |
| 23490526203 | DIPOTASSIUM    | Dipotassium                 |
|             | CLORAZEPATE    | Clorazepate                 |

|             |                  |                  |
|-------------|------------------|------------------|
|             | DIPOTASSIUM      | Dipotassium      |
|             | CLORAZEPATE      | Clorazepate      |
| 23490526303 | DIPOTASSIUM      | Dipotassium      |
|             | CHLORDIAZEPOXIDE | Chlordiazepoxide |
| 23490526601 | HCL              | Hydrochloride    |
|             | CHLORDIAZEPOXIDE | Chlordiazepoxide |
| 23490526701 | HCL              | Hydrochloride    |
|             | CHLORDIAZEPOXIDE | Chlordiazepoxide |
| 23490526702 | HCL              | Hydrochloride    |
|             | CHLORDIAZEPOXIDE | Chlordiazepoxide |
| 23490526703 | HCL              | Hydrochloride    |
| 23490541800 | DIAZEPAM         | Diazepam         |
| 23490541801 | DIAZEPAM         | Diazepam         |
| 23490541802 | DIAZEPAM         | Diazepam         |
| 23490541803 | DIAZEPAM         | Diazepam         |
| 23490541804 | DIAZEPAM         | Diazepam         |
| 23490541805 | DIAZEPAM         | Diazepam         |
| 23490541806 | DIAZEPAM         | Diazepam         |
| 23490541807 | DIAZEPAM         | Diazepam         |
| 23490541901 | DIAZEPAM         | Diazepam         |
| 23490541902 | DIAZEPAM         | Diazepam         |
| 23490541903 | DIAZEPAM         | Diazepam         |
| 23490542001 | DIAZEPAM         | Diazepam         |
| 23490542002 | DIAZEPAM         | Diazepam         |
| 23490542003 | DIAZEPAM         | Diazepam         |
| 23490542004 | DIAZEPAM         | Diazepam         |
| 23490542005 | DIAZEPAM         | Diazepam         |
| 23490542006 | DIAZEPAM         | Diazepam         |
| 23490542007 | DIAZEPAM         | Diazepam         |
|             |                  | Flurazepam       |
| 23490561003 | FLURAZEPAM HCL   | Hydrochloride    |
|             |                  | Flurazepam       |
| 23490561006 | FLURAZEPAM HCL   | Hydrochloride    |
|             |                  | Flurazepam       |
| 23490561103 | FLURAZEPAM HCL   | Hydrochloride    |
|             |                  | Flurazepam       |
| 23490561106 | FLURAZEPAM HCL   | Hydrochloride    |
| 23490583400 | LORAZEPAM        | Lorazepam        |
| 23490583401 | LORAZEPAM        | Lorazepam        |
| 23490583501 | LORAZEPAM        | Lorazepam        |
| 23490583502 | LORAZEPAM        | Lorazepam        |
| 23490583503 | LORAZEPAM        | Lorazepam        |
| 23490583504 | LORAZEPAM        | Lorazepam        |
| 23490583600 | LORAZEPAM        | Lorazepam        |
| 23490583601 | LORAZEPAM        | Lorazepam        |

|             |               |                            |
|-------------|---------------|----------------------------|
| 23490583602 | LORAZEPAM     | Lorazepam<br>Midazolam     |
| 23490593201 | MIDAZOLAM HCL | Hydrochloride<br>Midazolam |
| 23490593301 | MIDAZOLAM HCL | Hydrochloride<br>Midazolam |
| 23490593302 | MIDAZOLAM HCL | Hydrochloride              |
| 23490632201 | TEMAZEPAM     | Temazepam                  |
| 23490632202 | TEMAZEPAM     | Temazepam                  |
| 23490632203 | TEMAZEPAM     | Temazepam                  |
| 23490632204 | TEMAZEPAM     | Temazepam                  |
| 23490632205 | TEMAZEPAM     | Temazepam                  |
| 23490632301 | TEMAZEPAM     | Temazepam                  |
| 23490632302 | TEMAZEPAM     | Temazepam                  |
| 23490632303 | TEMAZEPAM     | Temazepam                  |
| 23490632304 | TEMAZEPAM     | Temazepam                  |
| 23490643201 | TRIAZOLAM     | Triazolam                  |
| 23490643202 | TRIAZOLAM     | Triazolam                  |
| 23490643203 | TRIAZOLAM     | Triazolam                  |
| 23490643204 | TRIAZOLAM     | Triazolam                  |
| 23490754502 | DIAZEPAM      | Diazepam<br>Midazolam      |
| 24200056937 | MIDAZOLAM     | Hydrochloride<br>Midazolam |
| 24200056944 | MIDAZOLAM     | Hydrochloride<br>Midazolam |
| 24200056945 | MIDAZOLAM     | Hydrochloride              |
| 24200092961 | LORAZEPAM     | Lorazepam<br>Midazolam     |
| 25021065502 | MIDAZOLAM     | Hydrochloride<br>Midazolam |
| 25021065505 | MIDAZOLAM     | Hydrochloride<br>Midazolam |
| 25021065601 | MIDAZOLAM     | Hydrochloride<br>Midazolam |
| 25021065602 | MIDAZOLAM     | Hydrochloride<br>Midazolam |
| 25021066010 | MIDAZOLAM     | Hydrochloride<br>Midazolam |
| 25021066105 | MIDAZOLAM     | Hydrochloride<br>Midazolam |
| 25021066110 | MIDAZOLAM     | Hydrochloride              |
| 25332044510 | T-QUIL        | Diazepam                   |
| 33261000402 | ALPRAZOLAM    | Alprazolam                 |
| 33261000407 | ALPRAZOLAM    | Alprazolam                 |

|             |             |             |
|-------------|-------------|-------------|
| 33261000410 | ALPRAZOLAM  | Alprazolam  |
| 33261000414 | ALPRAZOLAM  | Alprazolam  |
| 33261000420 | ALPRAZOLAM  | Alprazolam  |
| 33261000421 | ALPRAZOLAM  | Alprazolam  |
| 33261000428 | ALPRAZOLAM  | Alprazolam  |
| 33261000430 | ALPRAZOLAM  | Alprazolam  |
| 33261000440 | ALPRAZOLAM  | Alprazolam  |
| 33261000445 | ALPRAZOLAM  | Alprazolam  |
| 33261000460 | ALPRAZOLAM  | Alprazolam  |
| 33261000490 | ALPRAZOLAM  | Alprazolam  |
| 33261000500 | ALPRAZOLAM  | Alprazolam  |
| 33261000506 | ALPRAZOLAM  | Alprazolam  |
| 33261000515 | ALPRAZOLAM  | Alprazolam  |
| 33261000530 | ALPRAZOLAM  | Alprazolam  |
| 33261000560 | ALPRAZOLAM  | Alprazolam  |
| 33261000590 | ALPRAZOLAM  | Alprazolam  |
|             | CLORAZEPATE | Clorazepate |
| 33261003007 | DIPOTASSIUM | Dipotassium |
|             | CLORAZEPATE | Clorazepate |
| 33261003010 | DIPOTASSIUM | Dipotassium |
|             | CLORAZEPATE | Clorazepate |
| 33261003014 | DIPOTASSIUM | Dipotassium |
|             | CLORAZEPATE | Clorazepate |
| 33261003020 | DIPOTASSIUM | Dipotassium |
|             | CLORAZEPATE | Clorazepate |
| 33261003021 | DIPOTASSIUM | Dipotassium |
|             | CLORAZEPATE | Clorazepate |
| 33261003028 | DIPOTASSIUM | Dipotassium |
|             | CLORAZEPATE | Clorazepate |
| 33261003030 | DIPOTASSIUM | Dipotassium |
|             | CLORAZEPATE | Clorazepate |
| 33261003040 | DIPOTASSIUM | Dipotassium |
|             | CLORAZEPATE | Clorazepate |
| 33261003060 | DIPOTASSIUM | Dipotassium |
|             | CLORAZEPATE | Clorazepate |
| 33261003110 | DIPOTASSIUM | Dipotassium |
|             | CLORAZEPATE | Clorazepate |
| 33261003114 | DIPOTASSIUM | Dipotassium |
|             | CLORAZEPATE | Clorazepate |
| 33261003120 | DIPOTASSIUM | Dipotassium |
|             | CLORAZEPATE | Clorazepate |
| 33261003121 | DIPOTASSIUM | Dipotassium |
|             | CLORAZEPATE | Clorazepate |
| 33261003128 | DIPOTASSIUM | Dipotassium |
|             | CLORAZEPATE | Clorazepate |
| 33261003130 | DIPOTASSIUM | Dipotassium |

|             |                            |                            |
|-------------|----------------------------|----------------------------|
|             | CLORAZEPATE                | Clorazepate                |
| 33261003160 | DIPOTASSIUM<br>CLORAZEPATE | Dipotassium<br>Clorazepate |
| 33261003190 | DIPOTASSIUM<br>CLORAZEPATE | Dipotassium<br>Clorazepate |
| 33261003207 | DIPOTASSIUM<br>CLORAZEPATE | Dipotassium<br>Clorazepate |
| 33261003214 | DIPOTASSIUM<br>CLORAZEPATE | Dipotassium<br>Clorazepate |
| 33261003220 | DIPOTASSIUM<br>CLORAZEPATE | Dipotassium<br>Clorazepate |
| 33261003221 | DIPOTASSIUM<br>CLORAZEPATE | Dipotassium<br>Clorazepate |
| 33261003228 | DIPOTASSIUM<br>CLORAZEPATE | Dipotassium<br>Clorazepate |
| 33261003230 | DIPOTASSIUM<br>CLORAZEPATE | Dipotassium<br>Clorazepate |
| 33261003240 | DIPOTASSIUM<br>CLORAZEPATE | Dipotassium<br>Clorazepate |
| 33261003260 | DIPOTASSIUM<br>CLORAZEPATE | Dipotassium<br>Clorazepate |
| 33261003290 | DIPOTASSIUM                | Dipotassium                |
| 33261003407 | DIAZEPAM                   | Diazepam                   |
| 33261003414 | DIAZEPAM                   | Diazepam                   |
| 33261003420 | DIAZEPAM                   | Diazepam                   |
| 33261003421 | DIAZEPAM                   | Diazepam                   |
| 33261003428 | DIAZEPAM                   | Diazepam                   |
| 33261003429 | DIAZEPAM                   | Diazepam                   |
| 33261003430 | DIAZEPAM                   | Diazepam                   |
| 33261003440 | DIAZEPAM                   | Diazepam                   |
| 33261003460 | DIAZEPAM                   | Diazepam                   |
| 33261003490 | DIAZEPAM                   | Diazepam                   |
| 33261003505 | DIAZEPAM                   | Diazepam                   |
| 33261003507 | DIAZEPAM                   | Diazepam                   |
| 33261003514 | DIAZEPAM                   | Diazepam                   |
| 33261003520 | DIAZEPAM                   | Diazepam                   |
| 33261003521 | DIAZEPAM                   | Diazepam                   |
| 33261003528 | DIAZEPAM                   | Diazepam                   |
| 33261003530 | DIAZEPAM                   | Diazepam                   |
| 33261003540 | DIAZEPAM                   | Diazepam                   |
| 33261003560 | DIAZEPAM                   | Diazepam                   |
| 33261003590 | DIAZEPAM                   | Diazepam                   |
|             |                            | Flurazepam                 |
| 33261004700 | FLURAZEPAM HCL             | Hydrochloride              |
| 33261004730 | FLURAZEPAM HCL             | Flurazepam                 |

|             |                |               |
|-------------|----------------|---------------|
|             |                | Hydrochloride |
|             |                | Flurazepam    |
| 33261004760 | FLURAZEPAM HCL | Hydrochloride |
|             |                | Flurazepam    |
| 33261004790 | FLURAZEPAM HCL | Hydrochloride |
| 33261006805 | LORAZEPAM      | Lorazepam     |
| 33261006807 | LORAZEPAM      | Lorazepam     |
| 33261006810 | LORAZEPAM      | Lorazepam     |
| 33261006814 | LORAZEPAM      | Lorazepam     |
| 33261006821 | LORAZEPAM      | Lorazepam     |
| 33261006828 | LORAZEPAM      | Lorazepam     |
| 33261006830 | LORAZEPAM      | Lorazepam     |
| 33261006860 | LORAZEPAM      | Lorazepam     |
| 33261006890 | LORAZEPAM      | Lorazepam     |
| 33261006907 | LORAZEPAM      | Lorazepam     |
| 33261006914 | LORAZEPAM      | Lorazepam     |
| 33261006921 | LORAZEPAM      | Lorazepam     |
| 33261006928 | LORAZEPAM      | Lorazepam     |
| 33261006930 | LORAZEPAM      | Lorazepam     |
| 33261006960 | LORAZEPAM      | Lorazepam     |
| 33261006990 | LORAZEPAM      | Lorazepam     |
| 33261010107 | TEMAZEPAM      | Temazepam     |
| 33261010110 | TEMAZEPAM      | Temazepam     |
| 33261010114 | TEMAZEPAM      | Temazepam     |
| 33261010115 | TEMAZEPAM      | Temazepam     |
| 33261010120 | TEMAZEPAM      | Temazepam     |
| 33261010121 | TEMAZEPAM      | Temazepam     |
| 33261010128 | TEMAZEPAM      | Temazepam     |
| 33261010130 | TEMAZEPAM      | Temazepam     |
| 33261010160 | TEMAZEPAM      | Temazepam     |
| 33261010190 | TEMAZEPAM      | Temazepam     |
| 33261010202 | TEMAZEPAM      | Temazepam     |
| 33261010207 | TEMAZEPAM      | Temazepam     |
| 33261010214 | TEMAZEPAM      | Temazepam     |
| 33261010220 | TEMAZEPAM      | Temazepam     |
| 33261010221 | TEMAZEPAM      | Temazepam     |
| 33261010228 | TEMAZEPAM      | Temazepam     |
| 33261010230 | TEMAZEPAM      | Temazepam     |
| 33261010240 | TEMAZEPAM      | Temazepam     |
| 33261010260 | TEMAZEPAM      | Temazepam     |
| 33261010282 | TEMAZEPAM      | Temazepam     |
| 33261010290 | TEMAZEPAM      | Temazepam     |
| 33261010805 | TRIAZOLAM      | Triazolam     |

|             |            |            |
|-------------|------------|------------|
| 33261010814 | TRIAZOLAM  | Triazolam  |
| 33261010830 | TRIAZOLAM  | Triazolam  |
| 33261010860 | TRIAZOLAM  | Triazolam  |
| 33261010890 | TRIAZOLAM  | Triazolam  |
| 33261036407 | LORAZEPAM  | Lorazepam  |
| 33261036414 | LORAZEPAM  | Lorazepam  |
| 33261036421 | LORAZEPAM  | Lorazepam  |
| 33261036428 | LORAZEPAM  | Lorazepam  |
| 33261036430 | LORAZEPAM  | Lorazepam  |
| 33261036440 | LORAZEPAM  | Lorazepam  |
| 33261036460 | LORAZEPAM  | Lorazepam  |
| 33261036490 | LORAZEPAM  | Lorazepam  |
| 33261050002 | ALPRAZOLAM | Alprazolam |
| 33261050030 | ALPRAZOLAM | Alprazolam |
| 33261050060 | ALPRAZOLAM | Alprazolam |
| 33261050090 | ALPRAZOLAM | Alprazolam |
| 33261059420 | ALPRAZOLAM | Alprazolam |
| 33261059430 | ALPRAZOLAM | Alprazolam |
| 33261059460 | ALPRAZOLAM | Alprazolam |
| 33261059490 | ALPRAZOLAM | Alprazolam |
| 33261071700 | DIAZEPAM   | Diazepam   |
| 33261071730 | DIAZEPAM   | Diazepam   |
| 33261071760 | DIAZEPAM   | Diazepam   |
| 33261071790 | DIAZEPAM   | Diazepam   |
| 33261074100 | ALPRAZOLAM | Alprazolam |
| 33261074130 | ALPRAZOLAM | Alprazolam |
| 33261074142 | ALPRAZOLAM | Alprazolam |
| 33261074145 | ALPRAZOLAM | Alprazolam |
| 33261074160 | ALPRAZOLAM | Alprazolam |
| 33261074190 | ALPRAZOLAM | Alprazolam |
| 33261088200 | ESTAZOLAM  | Estazolam  |
| 33261088230 | ESTAZOLAM  | Estazolam  |
| 33261088260 | ESTAZOLAM  | Estazolam  |
| 33261088290 | ESTAZOLAM  | Estazolam  |
| 33358001430 | ALPRAZOLAM | Alprazolam |
| 33358001460 | ALPRAZOLAM | Alprazolam |
| 33358001520 | ALPRAZOLAM | Alprazolam |
| 33358001530 | ALPRAZOLAM | Alprazolam |
| 33358001540 | ALPRAZOLAM | Alprazolam |
| 33358001560 | ALPRAZOLAM | Alprazolam |
| 33358001590 | ALPRAZOLAM | Alprazolam |
| 33358001600 | ALPRAZOLAM | Alprazolam |
| 33358001610 | ALPRAZOLAM | Alprazolam |

|             |            |                             |
|-------------|------------|-----------------------------|
| 33358001620 | ALPRAZOLAM | Alprazolam                  |
| 33358001630 | ALPRAZOLAM | Alprazolam                  |
| 33358001640 | ALPRAZOLAM | Alprazolam                  |
| 33358001660 | ALPRAZOLAM | Alprazolam                  |
| 33358001740 | ALPRAZOLAM | Alprazolam                  |
| 33358001760 | ALPRAZOLAM | Alprazolam                  |
| 33358001790 | ALPRAZOLAM | Alprazolam                  |
| 33358010130 | DIAZEPAM   | Diazepam                    |
| 33358010212 | DIAZEPAM   | Diazepam                    |
| 33358010215 | DIAZEPAM   | Diazepam                    |
| 33358010220 | DIAZEPAM   | Diazepam                    |
| 33358010230 | DIAZEPAM   | Diazepam                    |
| 33358010260 | DIAZEPAM   | Diazepam                    |
| 33358010290 | DIAZEPAM   | Diazepam                    |
| 33358010300 | DIAZEPAM   | Diazepam                    |
| 33358010320 | DIAZEPAM   | Diazepam                    |
| 33358010330 | DIAZEPAM   | Diazepam                    |
| 33358010340 | DIAZEPAM   | Diazepam                    |
| 33358010350 | DIAZEPAM   | Diazepam                    |
| 33358010360 | DIAZEPAM   | Diazepam                    |
| 33358010390 | DIAZEPAM   | Diazepam                    |
|             |            | Flurazepam                  |
| 33358014630 | FLURAZEPAM | Hydrochloride<br>Flurazepam |
| 33358014660 | FLURAZEPAM | Hydrochloride<br>Flurazepam |
| 33358014730 | FLURAZEPAM | Hydrochloride<br>Flurazepam |
| 33358014760 | FLURAZEPAM | Hydrochloride               |
| 33358021930 | LORAZEPAM  | Lorazepam                   |
| 33358021960 | LORAZEPAM  | Lorazepam                   |
| 33358022003 | LORAZEPAM  | Lorazepam                   |
| 33358022014 | LORAZEPAM  | Lorazepam                   |
| 33358022015 | LORAZEPAM  | Lorazepam                   |
| 33358022030 | LORAZEPAM  | Lorazepam                   |
| 33358022050 | LORAZEPAM  | Lorazepam                   |
| 33358022060 | LORAZEPAM  | Lorazepam                   |
| 33358022090 | LORAZEPAM  | Lorazepam                   |
| 33358022130 | LORAZEPAM  | Lorazepam                   |
| 33358022160 | LORAZEPAM  | Lorazepam                   |
| 33358026300 | NIRAVAM    | Alprazolam                  |
| 33358026400 | NIRAVAM    | Alprazolam                  |
| 33358033220 | TEMAZEPAM  | Temazepam                   |
| 33358033230 | TEMAZEPAM  | Temazepam                   |

|             |                |               |
|-------------|----------------|---------------|
| 33358033260 | TEMAZEPAM      | Temazepam     |
| 33358033360 | TEMAZEPAM      | Temazepam     |
| 33358033390 | TEMAZEPAM      | Temazepam     |
| 33358035010 | TRIAZOLAM      | Triazolam     |
| 33358035015 | TRIAZOLAM      | Triazolam     |
| 33358035030 | TRIAZOLAM      | Triazolam     |
| 33358035060 | TRIAZOLAM      | Triazolam     |
| 35356000600 | VALIUM         | Diazepam      |
| 35356001300 | XANAX          | Alprazolam    |
| 35356002200 | VALIUM         | Diazepam      |
| 35356017020 | OXAZEPAM       | Oxazepam      |
| 35356037102 | DIAZEPAM       | Diazepam      |
| 35356037110 | DIAZEPAM       | Diazepam      |
|             |                | Flurazepam    |
| 35356043030 | FLURAZEPAM HCL | Hydrochloride |
|             |                | Midazolam     |
| 35356048210 | MIDAZOLAM HCL  | Hydrochloride |
| 35356050360 | ALPRAZOLAM XR  | Alprazolam    |
| 35356050460 | ALPRAZOLAM XR  | Alprazolam    |
| 35356050560 | ALPRAZOLAM XR  | Alprazolam    |
| 35356065730 | TRIAZOLAM      | Triazolam     |
| 35356066315 | TEMAZEPAM      | Temazepam     |
| 35356066415 | TEMAZEPAM      | Temazepam     |
| 35356066430 | TEMAZEPAM      | Temazepam     |
| 35356066460 | TEMAZEPAM      | Temazepam     |
| 35356066490 | TEMAZEPAM      | Temazepam     |
| 35356069405 | LORAZEPAM      | Lorazepam     |
| 35356069430 | LORAZEPAM      | Lorazepam     |
| 35356069460 | LORAZEPAM      | Lorazepam     |
| 35356069490 | LORAZEPAM      | Lorazepam     |
| 35356071602 | DIAZEPAM       | Diazepam      |
| 35356071604 | DIAZEPAM       | Diazepam      |
| 35356071610 | DIAZEPAM       | Diazepam      |
| 35356071620 | DIAZEPAM       | Diazepam      |
| 35356071630 | DIAZEPAM       | Diazepam      |
| 35356071660 | DIAZEPAM       | Diazepam      |
| 35356071690 | DIAZEPAM       | Diazepam      |
| 35356072401 | DIAZEPAM       | Diazepam      |
| 35356072402 | DIAZEPAM       | Diazepam      |
| 35356072430 | DIAZEPAM       | Diazepam      |
| 35356072460 | DIAZEPAM       | Diazepam      |
| 35356072490 | DIAZEPAM       | Diazepam      |
| 35356074410 | ALPRAZOLAM     | Alprazolam    |

|             |                  |                  |
|-------------|------------------|------------------|
| 35356074430 | ALPRAZOLAM       | Alprazolam       |
| 35356074460 | ALPRAZOLAM       | Alprazolam       |
| 35356074490 | ALPRAZOLAM       | Alprazolam       |
| 35356074730 | LORAZEPAM        | Lorazepam        |
| 35356075260 | ALPRAZOLAM       | Alprazolam       |
| 35356081200 | DIAZEPAM         | Diazepam         |
| 35356082130 | TEMAZEPAM        | Temazepam        |
| 35356084405 | LORAZEPAM        | Lorazepam        |
| 35356084415 | LORAZEPAM        | Lorazepam        |
| 35356084430 | LORAZEPAM        | Lorazepam        |
| 35356084460 | LORAZEPAM        | Lorazepam        |
| 35356084490 | LORAZEPAM        | Lorazepam        |
| 35356088230 | LORAZEPAM        | Lorazepam        |
| 35359069460 | LORAZEPAM        | Lorazepam        |
|             | CHLORDIAZEPOXIDE | Chlordiazepoxide |
| 35470036501 | HCL              | Hydrochloride    |
|             | CHLORDIAZEPOXIDE | Chlordiazepoxide |
| 35470036505 | HCL              | Hydrochloride    |
| 35470050101 | DIAZEPAM         | Diazepam         |
| 35470050105 | DIAZEPAM         | Diazepam         |
| 35470050109 | DIAZEPAM         | Diazepam         |
| 35470050201 | DIAZEPAM         | Diazepam         |
| 35470050205 | DIAZEPAM         | Diazepam         |
| 35470050209 | DIAZEPAM         | Diazepam         |
| 35470050301 | DIAZEPAM         | Diazepam         |
| 35470050305 | DIAZEPAM         | Diazepam         |
| 35470050309 | DIAZEPAM         | Diazepam         |
| 35470052301 | LORAZEPAM        | Lorazepam        |
| 35470052305 | LORAZEPAM        | Lorazepam        |
| 35470052401 | LORAZEPAM        | Lorazepam        |
| 35470052405 | LORAZEPAM        | Lorazepam        |
| 35470052501 | LORAZEPAM        | Lorazepam        |
| 35470052505 | LORAZEPAM        | Lorazepam        |
| 35470054301 | TEMAZEPAM        | Temazepam        |
| 35470054401 | TEMAZEPAM        | Temazepam        |
|             |                  | Flurazepam       |
| 35470054701 | FLURAZEPAM HCL   | Hydrochloride    |
|             |                  | Flurazepam       |
| 35470054705 | FLURAZEPAM HCL   | Hydrochloride    |
|             |                  | Flurazepam       |
| 35470054801 | FLURAZEPAM HCL   | Hydrochloride    |
|             |                  | Flurazepam       |
| 35470054805 | FLURAZEPAM HCL   | Hydrochloride    |
| 35470056001 | OXAZEPAM         | Oxazepam         |

|             |                  |                  |
|-------------|------------------|------------------|
| 35470056101 | OXAZEPAM         | Oxazepam         |
| 35470056201 | OXAZEPAM         | Oxazepam         |
|             | CLORAZEPATE      | Clorazepate      |
| 35470068201 | DIPOTASSIUM      | Dipotassium      |
|             | CLORAZEPATE      | Clorazepate      |
| 35470068301 | DIPOTASSIUM      | Dipotassium      |
|             | CLORAZEPATE      | Clorazepate      |
| 35470068401 | DIPOTASSIUM      | Dipotassium      |
|             | CHLORDIAZEPOXIDE | Chlordiazepoxide |
| 35470201301 | HCL              | Hydrochloride    |
|             | CHLORDIAZEPOXIDE | Chlordiazepoxide |
| 35470201305 | HCL              | Hydrochloride    |
|             | CHLORDIAZEPOXIDE | Chlordiazepoxide |
| 35470201501 | HCL              | Hydrochloride    |
|             | CHLORDIAZEPOXIDE | Chlordiazepoxide |
| 35470201505 | HCL              | Hydrochloride    |
|             | CHLORDIAZEPOXIDE | Chlordiazepoxide |
| 38022020505 | HCL              | Inactive Record  |
|             | CHLORDIAZEPOXIDE | Chlordiazepoxide |
| 38022020605 | HCL              | Inactive Record  |
|             | CHLORDIAZEPOXIDE | Chlordiazepoxide |
| 38022020705 | HCL              | Inactive Record  |
| 38779092504 | DIAZEPAM         | Diazepam         |
| 38779092505 | DIAZEPAM         | Diazepam         |
| 38779092508 | DIAZEPAM         | Diazepam         |
| 38779092509 | DIAZEPAM         | Diazepam         |
| 38779092700 | LORAZEPAM        | Lorazepam        |
| 38779092701 | LORAZEPAM        | Lorazepam        |
| 38779092703 | LORAZEPAM        | Lorazepam        |
| 38779092704 | LORAZEPAM        | Lorazepam        |
| 38779092705 | LORAZEPAM        | Lorazepam        |
| 38779092706 | LORAZEPAM        | Lorazepam        |
| 38779092708 | LORAZEPAM        | Lorazepam        |
| 38779199301 | ALPRAZOLAM       | Alprazolam       |
| 38779199304 | ALPRAZOLAM       | Alprazolam       |
| 38779199306 | ALPRAZOLAM       | Alprazolam       |
| 38779199309 | ALPRAZOLAM       | Alprazolam       |
| 41764020501 | LORAZEPAM        | Lorazepam        |
| 41764020502 | LORAZEPAM        | Lorazepam        |
| 41764020510 | LORAZEPAM        | Lorazepam        |
| 41764020515 | LORAZEPAM        | Lorazepam        |
| 41764020520 | LORAZEPAM        | Lorazepam        |
| 41764020550 | LORAZEPAM        | Lorazepam        |
|             | FLURAZEPAM       | Flurazepam       |
| 41764021301 | HYDROCHLORIDE    | Hydrochloride    |

|             |               |               |
|-------------|---------------|---------------|
|             | FLURAZEPAM    | Flurazepam    |
| 41764021330 | HYDROCHLORIDE | Hydrochloride |
|             | FLURAZEPAM    | Flurazepam    |
| 41764021401 | HYDROCHLORIDE | Hydrochloride |
|             | FLURAZEPAM    | Flurazepam    |
| 41764021420 | HYDROCHLORIDE | Hydrochloride |
|             | FLURAZEPAM    | Flurazepam    |
| 41764021430 | HYDROCHLORIDE | Hydrochloride |
| 41764022601 | DIAZEPAM      | Diazepam      |
| 41764022602 | DIAZEPAM      | Diazepam      |
| 41764022615 | DIAZEPAM      | Diazepam      |
| 41764022620 | DIAZEPAM      | Diazepam      |
| 41764022630 | DIAZEPAM      | Diazepam      |
| 41764022701 | DIAZEPAM      | Diazepam      |
| 41764022702 | DIAZEPAM      | Diazepam      |
| 41764022710 | DIAZEPAM      | Diazepam      |
| 41764022715 | DIAZEPAM      | Diazepam      |
| 41764022720 | DIAZEPAM      | Diazepam      |
| 41764022730 | DIAZEPAM      | Diazepam      |
| 41764022801 | DIAZEPAM      | Diazepam      |
| 41764022802 | DIAZEPAM      | Diazepam      |
| 41764022815 | DIAZEPAM      | Diazepam      |
| 41764022820 | DIAZEPAM      | Diazepam      |
| 41764022830 | DIAZEPAM      | Diazepam      |
| 41764025101 | ALPRAZOLAM    | Alprazolam    |
| 41764025102 | ALPRAZOLAM    | Alprazolam    |
| 41764025110 | ALPRAZOLAM    | Alprazolam    |
| 41764025120 | ALPRAZOLAM    | Alprazolam    |
| 41764025130 | ALPRAZOLAM    | Alprazolam    |
| 41764025201 | ALPRAZOLAM    | Alprazolam    |
| 41764025202 | ALPRAZOLAM    | Alprazolam    |
| 41764025210 | ALPRAZOLAM    | Alprazolam    |
| 41764025220 | ALPRAZOLAM    | Alprazolam    |
| 41764025230 | ALPRAZOLAM    | Alprazolam    |
| 41764025250 | ALPRAZOLAM    | Alprazolam    |
| 41764025301 | ALPRAZOLAM    | Alprazolam    |
| 41764025302 | ALPRAZOLAM    | Alprazolam    |
| 41764025310 | ALPRAZOLAM    | Alprazolam    |
| 41764025320 | ALPRAZOLAM    | Alprazolam    |
| 41764025330 | ALPRAZOLAM    | Alprazolam    |
| 41764025350 | ALPRAZOLAM    | Alprazolam    |
| 42254003303 | ALPRAZOLAM    | Alprazolam    |
| 42254003314 | ALPRAZOLAM    | Alprazolam    |
| 42254003320 | ALPRAZOLAM    | Alprazolam    |

|             |                  |                  |
|-------------|------------------|------------------|
| 42254003330 | ALPRAZOLAM       | Alprazolam       |
| 42254003360 | ALPRAZOLAM       | Alprazolam       |
| 42254003390 | ALPRAZOLAM       | Alprazolam       |
| 42254004815 | ALPRAZOLAM       | Alprazolam       |
| 42254004820 | ALPRAZOLAM       | Alprazolam       |
| 42254004830 | ALPRAZOLAM       | Alprazolam       |
| 42254004860 | ALPRAZOLAM       | Alprazolam       |
| 42254004890 | ALPRAZOLAM       | Alprazolam       |
| 42254009620 | LORAZEPAM        | Lorazepam        |
| 42254009630 | LORAZEPAM        | Lorazepam        |
| 42254009660 | LORAZEPAM        | Lorazepam        |
| 42254009690 | LORAZEPAM        | Lorazepam        |
| 42254011130 | LORAZEPAM        | Lorazepam        |
| 42254011160 | LORAZEPAM        | Lorazepam        |
| 42254011190 | LORAZEPAM        | Lorazepam        |
| 42254011305 | LORAZEPAM        | Lorazepam        |
| 42254011315 | LORAZEPAM        | Lorazepam        |
| 42254011330 | LORAZEPAM        | Lorazepam        |
| 42254011360 | LORAZEPAM        | Lorazepam        |
| 42254011390 | LORAZEPAM        | Lorazepam        |
| 42254021630 | ALPRAZOLAM       | Alprazolam       |
| 42254021660 | ALPRAZOLAM       | Alprazolam       |
| 42254021690 | ALPRAZOLAM       | Alprazolam       |
| 42254025403 | LORAZEPAM        | Lorazepam        |
| 42254029630 | TEMAZEPAM        | Temazepam        |
| 42254032130 | TEMAZEPAM        | Temazepam        |
| 42254032160 | TEMAZEPAM        | Temazepam        |
| 42254043230 | QUAZEPAM         | Quazepam         |
| 42254043260 | QUAZEPAM         | Quazepam         |
| 42291011160 | ALPRAZOLAM       | Alprazolam       |
| 42291011260 | ALPRAZOLAM       | Alprazolam       |
| 42291011360 | ALPRAZOLAM       | Alprazolam       |
|             | CHLORDIAZEPOXIDE | Chlordiazepoxide |
| 42291021090 | HCL              | Hydrochloride    |
|             | CHLORDIAZEPOXIDE | Chlordiazepoxide |
| 42291021190 | HCL              | Hydrochloride    |
|             | CHLORDIAZEPOXIDE | Chlordiazepoxide |
| 42291021290 | HCL              | Hydrochloride    |
| 42291079701 | TEMAZEPAM        | Temazepam        |
| 42549030930 | DIAZEPAM         | Diazepam         |
| 42549050930 | DIAZEPAM         | Diazepam         |
| 42549054730 | TRIAZOLAM        | Triazolam        |
| 42549055430 | DIAZEPAM         | Diazepam         |

|             |                  |                  |
|-------------|------------------|------------------|
| 42549055460 | DIAZEPAM         | Diazepam         |
| 42549055492 | DIAZEPAM         | Diazepam         |
| 42549055830 | LORAZEPAM        | Lorazepam        |
| 42549056130 | TEMAZEPAM        | Temazepam        |
| 42549060320 | DIAZEPAM         | Diazepam         |
| 42549060330 | DIAZEPAM         | Diazepam         |
| 42549060360 | DIAZEPAM         | Diazepam         |
| 42549060390 | DIAZEPAM         | Diazepam         |
| 42549065130 | TEMAZEPAM        | Temazepam        |
| 42549065160 | TEMAZEPAM        | Temazepam        |
| 42549065190 | TEMAZEPAM        | Temazepam        |
| 42549065510 | LORAZEPAM        | Lorazepam        |
| 42554011390 | LORAZEPAM        | Lorazepam        |
| 42554021690 | ALPRAZOLAM       | Alprazolam       |
| 43063001804 | DIAZEPAM         | Diazepam         |
| 43063001806 | DIAZEPAM         | Diazepam         |
|             | CLORAZEPATE      | Clorazepate      |
| 43063003003 | DIPOTASSIUM      | Dipotassium      |
|             | CLORAZEPATE      | Clorazepate      |
| 43063003006 | DIPOTASSIUM      | Dipotassium      |
|             | CLORAZEPATE      | Clorazepate      |
| 43063003010 | DIPOTASSIUM      | Dipotassium      |
|             | CLORAZEPATE      | Clorazepate      |
| 43063003012 | DIPOTASSIUM      | Dipotassium      |
|             | CHLORDIAZEPOXIDE | Chlordiazepoxide |
| 43063004603 | HCL              | Hydrochloride    |
|             | CHLORDIAZEPOXIDE | Chlordiazepoxide |
| 43063004606 | HCL              | Hydrochloride    |
|             | CHLORDIAZEPOXIDE | Chlordiazepoxide |
| 43063004612 | HCL              | Hydrochloride    |
|             | CHLORDIAZEPOXIDE | Chlordiazepoxide |
| 43063004615 | HCL              | Hydrochloride    |
|             | CHLORDIAZEPOXIDE | Chlordiazepoxide |
| 43063004619 | HCL              | Hydrochloride    |
|             | CHLORDIAZEPOXIDE | Chlordiazepoxide |
| 43063004624 | HCL              | Hydrochloride    |
| 43063004804 | LORAZEPAM        | Lorazepam        |
| 43063004806 | LORAZEPAM        | Lorazepam        |
| 43063004815 | LORAZEPAM        | Lorazepam        |
| 43063005706 | LORAZEPAM        | Lorazepam        |
| 43063006106 | ALPRAZOLAM       | Alprazolam       |
| 43063008806 | ALPRAZOLAM       | Alprazolam       |
|             | CLORAZEPATE      | Clorazepate      |
| 43063016412 | DIPOTASSIUM      | Dipotassium      |
| 43063036406 | ALPRAZOLAM       | Alprazolam       |

|             |                  |                  |
|-------------|------------------|------------------|
| 43063036430 | ALPRAZOLAM       | Alprazolam       |
| 43063036440 | ALPRAZOLAM       | Alprazolam       |
| 43063036460 | ALPRAZOLAM       | Alprazolam       |
| 43063036490 | ALPRAZOLAM       | Alprazolam       |
| 43063036498 | ALPRAZOLAM       | Alprazolam       |
| 43063036706 | ALPRAZOLAM       | Alprazolam       |
| 43063036715 | ALPRAZOLAM       | Alprazolam       |
| 43063036730 | ALPRAZOLAM       | Alprazolam       |
| 43063036760 | ALPRAZOLAM       | Alprazolam       |
| 43063036790 | ALPRAZOLAM       | Alprazolam       |
| 43063036798 | ALPRAZOLAM       | Alprazolam       |
| 43063037005 | ALPRAZOLAM       | Alprazolam       |
| 43063037020 | ALPRAZOLAM       | Alprazolam       |
| 43063037030 | ALPRAZOLAM       | Alprazolam       |
| 43063037060 | ALPRAZOLAM       | Alprazolam       |
| 43063037090 | ALPRAZOLAM       | Alprazolam       |
| 43063037098 | ALPRAZOLAM       | Alprazolam       |
| 43063055606 | ALPRAZOLAM       | Alprazolam       |
| 43063055630 | ALPRAZOLAM       | Alprazolam       |
| 43063055640 | ALPRAZOLAM       | Alprazolam       |
| 43063055660 | ALPRAZOLAM       | Alprazolam       |
| 43063055690 | ALPRAZOLAM       | Alprazolam       |
| 43063055698 | ALPRAZOLAM       | Alprazolam       |
| 43063060930 | ALPRAZOLAM       | Alprazolam       |
| 43063060940 | ALPRAZOLAM       | Alprazolam       |
| 43063060960 | ALPRAZOLAM       | Alprazolam       |
| 43063060990 | ALPRAZOLAM       | Alprazolam       |
| 43063071806 | DIAZEPAM         | Diazepam         |
| 43063071809 | DIAZEPAM         | Diazepam         |
| 43063071810 | DIAZEPAM         | Diazepam         |
| 43063071812 | DIAZEPAM         | Diazepam         |
| 43063071815 | DIAZEPAM         | Diazepam         |
| 43063071821 | DIAZEPAM         | Diazepam         |
| 43063071830 | DIAZEPAM         | Diazepam         |
| 43063071860 | DIAZEPAM         | Diazepam         |
| 43063071890 | DIAZEPAM         | Diazepam         |
|             | CHLORDIAZEPOXIDE | Chlordiazepoxide |
| 43547025110 | HCL              | Hydrochloride    |
|             | CHLORDIAZEPOXIDE | Chlordiazepoxide |
| 43547025210 | HCL              | Hydrochloride    |
|             | CHLORDIAZEPOXIDE | Chlordiazepoxide |
| 43547025310 | HCL              | Hydrochloride    |
|             |                  | Chlordiazepoxide |
| 43797029503 | MITRAN           | Hydrochloride    |

|             |                                         |                                           |
|-------------|-----------------------------------------|-------------------------------------------|
| 43797029505 | MITRAN                                  | Chlordiazepoxide<br>Hydrochloride         |
| 45865042230 | LORAZEPAM                               | Lorazepam                                 |
| 45865042249 | LORAZEPAM                               | Lorazepam                                 |
| 45865042251 | LORAZEPAM                               | Lorazepam                                 |
| 45865042260 | LORAZEPAM                               | Lorazepam                                 |
| 45865042290 | LORAZEPAM                               | Lorazepam                                 |
| 45865042330 | DIAZEPAM                                | Diazepam                                  |
| 45865042351 | DIAZEPAM                                | Diazepam                                  |
| 45865042360 | DIAZEPAM                                | Diazepam                                  |
| 45865042390 | DIAZEPAM                                | Diazepam                                  |
| 45865042430 | ALPRAZOLAM                              | Alprazolam                                |
| 45865042451 | ALPRAZOLAM                              | Alprazolam                                |
| 45865042460 | ALPRAZOLAM                              | Alprazolam                                |
| 45865042490 | ALPRAZOLAM                              | Alprazolam                                |
| 45865047030 | LORAZEPAM                               | Lorazepam                                 |
| 45865047049 | LORAZEPAM                               | Lorazepam                                 |
| 45865047051 | LORAZEPAM                               | Lorazepam                                 |
| 45865047060 | LORAZEPAM                               | Lorazepam                                 |
| 45865047090 | LORAZEPAM                               | Lorazepam                                 |
| 45865048130 | ALPRAZOLAM                              | Alprazolam                                |
| 45865048151 | ALPRAZOLAM                              | Alprazolam                                |
| 45865048160 | ALPRAZOLAM                              | Alprazolam                                |
| 45865048190 | ALPRAZOLAM                              | Alprazolam                                |
| 45865048230 | DIAZEPAM                                | Diazepam                                  |
| 45865048251 | DIAZEPAM                                | Diazepam                                  |
| 45865048260 | DIAZEPAM                                | Diazepam                                  |
| 45865048290 | DIAZEPAM                                | Diazepam                                  |
| 45865048430 | ALPRAZOLAM                              | Alprazolam                                |
| 45865048451 | ALPRAZOLAM                              | Alprazolam                                |
| 45865048460 | ALPRAZOLAM                              | Alprazolam                                |
| 45865048490 | ALPRAZOLAM                              | Alprazolam                                |
| 45865048930 | CLOAZEPATE<br>DIPOTASSIUM<br>CLOAZEPATE | Clorazepate<br>Dipotassium<br>Clorazepate |
| 45865048951 | DIPOTASSIUM<br>CLOAZEPATE               | Dipotassium<br>Clorazepate                |
| 45865048960 | DIPOTASSIUM<br>CLOAZEPATE               | Dipotassium<br>Clorazepate                |
| 45865048990 | DIPOTASSIUM                             | Dipotassium                               |
| 45865049930 | LORAZEPAM                               | Lorazepam                                 |
| 45865049949 | LORAZEPAM                               | Lorazepam                                 |
| 45865049951 | LORAZEPAM                               | Lorazepam                                 |
| 45865049960 | LORAZEPAM                               | Lorazepam                                 |

|             |                  |                  |
|-------------|------------------|------------------|
| 45865049990 | LORAZEPAM        | Lorazepam        |
| 45865052130 | ALPRAZOLAM       | Alprazolam       |
| 45865052151 | ALPRAZOLAM       | Alprazolam       |
| 45865052160 | ALPRAZOLAM       | Alprazolam       |
| 45865052190 | ALPRAZOLAM       | Alprazolam       |
|             | CLORAZEPATE      | Clorazepate      |
| 46063003012 | DIPOTASSIUM      | Dipotassium      |
|             |                  | Chlordiazepoxide |
| 47028001201 | POXI             | Hydrochloride    |
|             |                  | Chlordiazepoxide |
| 47028001205 | POXI             | Hydrochloride    |
|             | CHLORDIAZEPOXIDE | Chlordiazepoxide |
| 47202202603 | HCL              | Hydrochloride    |
|             | CHLORDIAZEPOXIDE | Chlordiazepoxide |
| 47202202703 | HCL              | Hydrochloride    |
|             | CHLORDIAZEPOXIDE | Chlordiazepoxide |
| 47202202802 | HCL              | Hydrochloride    |
| 47202255601 | LORAZEPAM        | Lorazepam        |
| 47202255602 | LORAZEPAM        | Lorazepam        |
| 47202255701 | LORAZEPAM        | Lorazepam        |
| 47202255703 | LORAZEPAM        | Lorazepam        |
| 47202255801 | LORAZEPAM        | Lorazepam        |
| 47202255803 | LORAZEPAM        | Lorazepam        |
| 47202255901 | DIAZEPAM         | Diazepam         |
| 47202255903 | DIAZEPAM         | Diazepam         |
| 47202256001 | DIAZEPAM         | Diazepam         |
| 47202256003 | DIAZEPAM         | Diazepam         |
| 47202256101 | DIAZEPAM         | Diazepam         |
| 47202256103 | DIAZEPAM         | Diazepam         |
| 47202256201 | TEMAZEPAM        | Temazepam        |
| 47202256202 | TEMAZEPAM        | Temazepam        |
| 47202256301 | TEMAZEPAM        | Temazepam        |
| 47202256302 | TEMAZEPAM        | Temazepam        |
|             |                  | Flurazepam       |
| 47202256401 | FLURAZEPAM HCL   | Hydrochloride    |
|             |                  | Flurazepam       |
| 47202256402 | FLURAZEPAM HCL   | Hydrochloride    |
|             |                  | Flurazepam       |
| 47202256501 | FLURAZEPAM HCL   | Hydrochloride    |
|             |                  | Flurazepam       |
| 47202256502 | FLURAZEPAM HCL   | Hydrochloride    |
| 47202256602 | Q-PAM            | Diazepam         |
| 47202257203 | DIAZEPAM         | Diazepam         |
| 47202257603 | DIAZEPAM         | Diazepam         |
| 47202257803 | LORAZEPAM        | Lorazepam        |

|             |                            |                                   |
|-------------|----------------------------|-----------------------------------|
|             | CLORAZEPATE                | Clorazepate                       |
| 47202257901 | DIPOTASSIUM<br>CLORAZEPATE | Dipotassium<br>Clorazepate        |
| 47202258001 | DIPOTASSIUM<br>CLORAZEPATE | Dipotassium<br>Clorazepate        |
| 47202258101 | DIPOTASSIUM                | Dipotassium                       |
| 47202258701 | TEMAZEPAM                  | Temazepam                         |
| 47202258702 | TEMAZEPAM<br>CLORAZEPATE   | Temazepam<br>Clorazepate          |
| 47202258901 | DIPOTASSIUM<br>CLORAZEPATE | Dipotassium<br>Clorazepate        |
| 47202259001 | DIPOTASSIUM<br>CLORAZEPATE | Dipotassium<br>Clorazepate        |
| 47202259101 | DIPOTASSIUM                | Dipotassium                       |
| 47202259201 | OXAZEPAM                   | Oxazepam                          |
| 47202259501 | OXAZEPAM                   | Oxazepam                          |
| 47202259601 | OXAZEPAM                   | Oxazepam                          |
| 47202259701 | OXAZEPAM                   | Oxazepam                          |
| 47202416401 | DIAZEPAM                   | Diazepam                          |
| 47335060313 | ALPRAZOLAM                 | Alprazolam                        |
| 47335060318 | ALPRAZOLAM                 | Alprazolam                        |
| 47335060388 | ALPRAZOLAM                 | Alprazolam                        |
| 47335060413 | ALPRAZOLAM                 | Alprazolam                        |
| 47335060418 | ALPRAZOLAM                 | Alprazolam                        |
| 47335060488 | ALPRAZOLAM                 | Alprazolam                        |
| 47335060513 | ALPRAZOLAM                 | Alprazolam                        |
| 47335060518 | ALPRAZOLAM                 | Alprazolam                        |
| 47335060588 | ALPRAZOLAM                 | Alprazolam                        |
| 47335060688 | ALPRAZOLAM                 | Alprazolam                        |
| 47463000830 | ALPRAZOLAM                 | Alprazolam                        |
| 47463000930 | ALPRAZOLAM                 | Alprazolam                        |
| 47463044190 | LORAZEPAM                  | Lorazepam                         |
| 47463079030 | TEMAZEPAM                  | Temazepam                         |
| 47463079060 | TEMAZEPAM                  | Temazepam                         |
| 47471001903 | LIBACA<br>CHLORDIAZEPOXIDE | Chlordiazepoxide<br>Hydrochloride |
| 47679028203 | HCL<br>CHLORDIAZEPOXIDE    | Hydrochloride<br>Chlordiazepoxide |
| 47679028235 | HCL<br>CHLORDIAZEPOXIDE    | Hydrochloride<br>Chlordiazepoxide |
| 47679028273 | HCL<br>CHLORDIAZEPOXIDE    | Hydrochloride<br>Chlordiazepoxide |
| 47679028303 | HCL                        | Hydrochloride                     |
| 47679028335 | CHLORDIAZEPOXIDE           | Chlordiazepoxide                  |

|             |                  |                  |
|-------------|------------------|------------------|
|             | HCL              | Hydrochloride    |
|             | CHLORDIAZEPOXIDE | Chlordiazepoxide |
| 47679028373 | HCL              | Hydrochloride    |
|             | CHLORDIAZEPOXIDE | Chlordiazepoxide |
| 47679028403 | HCL              | Hydrochloride    |
|             | CHLORDIAZEPOXIDE | Chlordiazepoxide |
| 47679028435 | HCL              | Hydrochloride    |
|             | CHLORDIAZEPOXIDE | Chlordiazepoxide |
| 47679028473 | HCL              | Hydrochloride    |
| 47679057201 | DIAZEPAM         | Diazepam         |
| 47679057203 | DIAZEPAM         | Diazepam         |
| 47679057235 | DIAZEPAM         | Diazepam         |
| 47679057273 | DIAZEPAM         | Diazepam         |
| 47679057301 | DIAZEPAM         | Diazepam         |
| 47679057303 | DIAZEPAM         | Diazepam         |
| 47679057335 | DIAZEPAM         | Diazepam         |
| 47679057373 | DIAZEPAM         | Diazepam         |
| 47679057401 | DIAZEPAM         | Diazepam         |
| 47679057403 | DIAZEPAM         | Diazepam         |
| 47679057435 | DIAZEPAM         | Diazepam         |
| 47679057473 | DIAZEPAM         | Diazepam         |
| 47679060301 | LORAZEPAM        | Lorazepam        |
| 47679060373 | LORAZEPAM        | Lorazepam        |
| 47679060401 | LORAZEPAM        | Lorazepam        |
| 47679060403 | LORAZEPAM        | Lorazepam        |
| 47679060473 | LORAZEPAM        | Lorazepam        |
| 47679060501 | LORAZEPAM        | Lorazepam        |
| 47679060573 | LORAZEPAM        | Lorazepam        |
| 47679071801 | TEMAZEPAM        | Temazepam        |
| 47679071803 | TEMAZEPAM        | Temazepam        |
| 47679071835 | TEMAZEPAM        | Temazepam        |
| 47679073800 | DIAZEPAM         | Diazepam         |
| 47679073810 | DIAZEPAM         | Diazepam         |
| 47679073830 | DIAZEPAM         | Diazepam         |
| 47679080501 | TEMAZEPAM        | Temazepam        |
| 47679080503 | TEMAZEPAM        | Temazepam        |
| 47679080535 | TEMAZEPAM        | Temazepam        |
|             |                  | Flurazepam       |
| 47679080603 | FLURAZEPAM HCL   | Hydrochloride    |
|             | CLORAZEPATE      | Clorazepate      |
| 47679084501 | DIPOTASSIUM      | Dipotassium      |
|             | CLORAZEPATE      | Clorazepate      |
| 47679084535 | DIPOTASSIUM      | Dipotassium      |
| 47679084601 | CLORAZEPATE      | Clorazepate      |

|             |                  |                  |
|-------------|------------------|------------------|
|             | DIPOTASSIUM      | Dipotassium      |
|             | CLORAZEPATE      | Clorazepate      |
| 47679084635 | DIPOTASSIUM      | Dipotassium      |
|             | CLORAZEPATE      | Clorazepate      |
| 47679084701 | DIPOTASSIUM      | Dipotassium      |
|             | CLORAZEPATE      | Clorazepate      |
| 47679084735 | DIPOTASSIUM      | Dipotassium      |
|             | CHLORDIAZEPOXIDE | Chlordiazepoxide |
| 47837012601 | HCL              | Hydrochloride    |
|             | CHLORDIAZEPOXIDE | Chlordiazepoxide |
| 47837012605 | HCL              | Hydrochloride    |
|             | CHLORDIAZEPOXIDE | Chlordiazepoxide |
| 47837012610 | HCL              | Hydrochloride    |
|             | CHLORDIAZEPOXIDE | Chlordiazepoxide |
| 47837012701 | HCL              | Hydrochloride    |
|             | CHLORDIAZEPOXIDE | Chlordiazepoxide |
| 47837012705 | HCL              | Hydrochloride    |
|             | CHLORDIAZEPOXIDE | Chlordiazepoxide |
| 47837012710 | HCL              | Hydrochloride    |
|             | CHLORDIAZEPOXIDE | Chlordiazepoxide |
| 47837012801 | HCL              | Hydrochloride    |
|             | CHLORDIAZEPOXIDE | Chlordiazepoxide |
| 47837012805 | HCL              | Hydrochloride    |
|             | CHLORDIAZEPOXIDE | Chlordiazepoxide |
| 47837012810 | HCL              | Hydrochloride    |
|             | CHLORDIAZEPOXIDE | Chlordiazepoxide |
| 48253033401 | HCL              | Hydrochloride    |
|             | CHLORDIAZEPOXIDE | Chlordiazepoxide |
| 48253033505 | HCL              | Hydrochloride    |
|             | CHLORDIAZEPOXIDE | Chlordiazepoxide |
| 48253033601 | HCL              | Hydrochloride    |
|             | CHLORDIAZEPOXIDE | Chlordiazepoxide |
| 49335200701 | HCL              | Hydrochloride    |
|             | CHLORDIAZEPOXIDE | Chlordiazepoxide |
| 49335200702 | HCL              | Hydrochloride    |
|             | CHLORDIAZEPOXIDE | Chlordiazepoxide |
| 49335200705 | HCL              | Hydrochloride    |
|             | CHLORDIAZEPOXIDE | Chlordiazepoxide |
| 49335200801 | HCL              | Hydrochloride    |
|             | CHLORDIAZEPOXIDE | Chlordiazepoxide |
| 49335200802 | HCL              | Hydrochloride    |
|             | CHLORDIAZEPOXIDE | Chlordiazepoxide |
| 49335200805 | HCL              | Hydrochloride    |
|             | CHLORDIAZEPOXIDE | Chlordiazepoxide |
| 49335200901 | HCL              | Hydrochloride    |
|             | CHLORDIAZEPOXIDE | Chlordiazepoxide |
| 49335200902 | HCL              | Hydrochloride    |
| 49335200905 | CHLORDIAZEPOXIDE | Chlordiazepoxide |

|             |                  |                  |
|-------------|------------------|------------------|
|             | HCL              | Hydrochloride    |
| 49452029501 | ALPRAZOLAM       | Alprazolam       |
| 49452029502 | ALPRAZOLAM       | Alprazolam       |
| 49452029503 | ALPRAZOLAM       | Alprazolam       |
| 49452029504 | ALPRAZOLAM       | Alprazolam       |
| 49452253801 | DIAZEPAM         | Diazepam         |
| 49452253802 | DIAZEPAM         | Diazepam         |
| 49452253803 | DIAZEPAM         | Diazepam         |
| 49452253804 | DIAZEPAM         | Diazepam         |
| 49452253805 | DIAZEPAM         | Diazepam         |
| 49452254001 | DIAZEPAM         | Diazepam         |
| 49452254002 | DIAZEPAM         | Diazepam         |
| 49452254003 | DIAZEPAM         | Diazepam         |
| 49452395601 | LORAZEPAM        | Lorazepam        |
| 49452395602 | LORAZEPAM        | Lorazepam        |
| 49452395603 | LORAZEPAM        | Lorazepam        |
| 49452395604 | LORAZEPAM        | Lorazepam        |
| 49452414001 | LORAZEPAM        | Lorazepam        |
| 49452414002 | LORAZEPAM        | Lorazepam        |
| 49452414003 | LORAZEPAM        | Lorazepam        |
| 49452414004 | LORAZEPAM        | Lorazepam        |
| 49452472201 | MIDAZOLAM        | Midazolam        |
| 49452472202 | MIDAZOLAM        | Midazolam        |
| 49452472203 | MIDAZOLAM        | Midazolam        |
| 49452472204 | MIDAZOLAM        | Midazolam        |
| 49502040501 | ALPRAZOLAM       | Alprazolam       |
| 49502040505 | ALPRAZOLAM       | Alprazolam       |
| 49502040601 | ALPRAZOLAM       | Alprazolam       |
| 49502040605 | ALPRAZOLAM       | Alprazolam       |
| 49502040701 | ALPRAZOLAM       | Alprazolam       |
| 49502040705 | ALPRAZOLAM       | Alprazolam       |
| 49502041201 | TRIAZOLAM        | Triazolam        |
| 49502041301 | TRIAZOLAM        | Triazolam        |
|             | CHLORDIAZEPOXIDE | Chlordiazepoxide |
| 49727026105 | HCL              | Hydrochloride    |
|             | CHLORDIAZEPOXIDE | Chlordiazepoxide |
| 49727026205 | HCL              | Hydrochloride    |
|             | CHLORDIAZEPOXIDE | Chlordiazepoxide |
| 49727026305 | HCL              | Hydrochloride    |
| 49884011074 | ALPRAZOLAM       | Alprazolam       |
| 49884011174 | ALPRAZOLAM       | Alprazolam       |
| 49884011201 | ESTAZOLAM        | Estazolam        |
| 49884019001 | DIAZEPAM         | Diazepam         |

|             |                |                             |
|-------------|----------------|-----------------------------|
| 49884019005 | DIAZEPAM       | Diazepam                    |
| 49884019010 | DIAZEPAM       | Diazepam                    |
| 49884019101 | DIAZEPAM       | Diazepam                    |
| 49884019105 | DIAZEPAM       | Diazepam                    |
| 49884019110 | DIAZEPAM       | Diazepam                    |
| 49884019201 | DIAZEPAM       | Diazepam                    |
| 49884019205 | DIAZEPAM       | Diazepam                    |
| 49884019210 | DIAZEPAM       | Diazepam<br>Flurazepam      |
| 49884019301 | FLURAZEPAM HCL | Hydrochloride<br>Flurazepam |
| 49884019305 | FLURAZEPAM HCL | Hydrochloride<br>Flurazepam |
| 49884019310 | FLURAZEPAM HCL | Hydrochloride<br>Flurazepam |
| 49884019401 | FLURAZEPAM HCL | Hydrochloride<br>Flurazepam |
| 49884019405 | FLURAZEPAM HCL | Hydrochloride<br>Flurazepam |
| 49884019410 | FLURAZEPAM HCL | Hydrochloride               |
| 49884020601 | LORAZEPAM      | Lorazepam                   |
| 49884020604 | LORAZEPAM      | Lorazepam                   |
| 49884020605 | LORAZEPAM      | Lorazepam                   |
| 49884020610 | LORAZEPAM      | Lorazepam                   |
| 49884020701 | LORAZEPAM      | Lorazepam                   |
| 49884020704 | LORAZEPAM      | Lorazepam                   |
| 49884020705 | LORAZEPAM      | Lorazepam                   |
| 49884020710 | LORAZEPAM      | Lorazepam                   |
| 49884020801 | LORAZEPAM      | Lorazepam                   |
| 49884020804 | LORAZEPAM      | Lorazepam                   |
| 49884020805 | LORAZEPAM      | Lorazepam                   |
| 49884020810 | LORAZEPAM      | Lorazepam                   |
| 49884021374 | ALPRAZOLAM     | Alprazolam                  |
| 49884021452 | ALPRAZOLAM     | Alprazolam                  |
| 49884021474 | ALPRAZOLAM     | Alprazolam                  |
| 49884024001 | TEMAZEPAM      | Temazepam                   |
| 49884024005 | TEMAZEPAM      | Temazepam                   |
| 49884024011 | TEMAZEPAM      | Temazepam                   |
| 49884024101 | TEMAZEPAM      | Temazepam                   |
| 49884024105 | TEMAZEPAM      | Temazepam                   |
| 49884024111 | TEMAZEPAM      | Temazepam                   |
| 49884034301 | ESTAZOLAM      | Estazolam                   |
| 49884034901 | ESTAZOLAM      | Estazolam                   |
| 49884035001 | ESTAZOLAM      | Estazolam                   |

|             |                  |                  |
|-------------|------------------|------------------|
| 49884040001 | ALPRAZOLAM       | Alprazolam       |
| 49884040005 | ALPRAZOLAM       | Alprazolam       |
| 49884044801 | ALPRAZOLAM       | Alprazolam       |
| 49884044805 | ALPRAZOLAM       | Alprazolam       |
| 49884044901 | ALPRAZOLAM       | Alprazolam       |
| 49884044905 | ALPRAZOLAM       | Alprazolam       |
| 49884045001 | ALPRAZOLAM       | Alprazolam       |
| 49884045005 | ALPRAZOLAM       | Alprazolam       |
| 49884045301 | TRIAZOLAM        | Triazolam        |
| 49884045305 | TRIAZOLAM        | Triazolam        |
| 49884045312 | TRIAZOLAM        | Triazolam        |
| 49884045351 | TRIAZOLAM        | Triazolam        |
| 49884045362 | TRIAZOLAM        | Triazolam        |
| 49884045401 | TRIAZOLAM        | Triazolam        |
| 49884045405 | TRIAZOLAM        | Triazolam        |
| 49884045412 | TRIAZOLAM        | Triazolam        |
| 49884045451 | TRIAZOLAM        | Triazolam        |
| 49884045462 | TRIAZOLAM        | Triazolam        |
|             | CHLORDIAZEPOXIDE | Chlordiazepoxide |
| 49884095801 | HCL              | Hydrochloride    |
|             | CHLORDIAZEPOXIDE | Chlordiazepoxide |
| 49884095901 | HCL              | Hydrochloride    |
|             | CHLORDIAZEPOXIDE | Chlordiazepoxide |
| 49884096001 | HCL              | Hydrochloride    |
| 49999001802 | DIAZEPAM         | Diazepam         |
| 49999001803 | DIAZEPAM         | Diazepam         |
| 49999001805 | DIAZEPAM         | Diazepam         |
| 49999001810 | DIAZEPAM         | Diazepam         |
| 49999001815 | DIAZEPAM         | Diazepam         |
| 49999001820 | DIAZEPAM         | Diazepam         |
| 49999001821 | DIAZEPAM         | Diazepam         |
| 49999001830 | DIAZEPAM         | Diazepam         |
| 49999001860 | DIAZEPAM         | Diazepam         |
| 49999001890 | DIAZEPAM         | Diazepam         |
| 49999002700 | DIAZEPAM         | Diazepam         |
| 49999002701 | DIAZEPAM         | Diazepam         |
| 49999002702 | DIAZEPAM         | Diazepam         |
| 49999002720 | DIAZEPAM         | Diazepam         |
| 49999002730 | DIAZEPAM         | Diazepam         |
| 49999002760 | DIAZEPAM         | Diazepam         |
| 49999002790 | DIAZEPAM         | Diazepam         |
| 49999003200 | ALPRAZOLAM       | Alprazolam       |
| 49999003202 | ALPRAZOLAM       | Alprazolam       |

|             |                  |                  |
|-------------|------------------|------------------|
| 49999003204 | ALPRAZOLAM       | Alprazolam       |
| 49999003215 | ALPRAZOLAM       | Alprazolam       |
| 49999003230 | ALPRAZOLAM       | Alprazolam       |
| 49999003260 | ALPRAZOLAM       | Alprazolam       |
| 49999003290 | ALPRAZOLAM       | Alprazolam       |
| 49999003910 | ALPRAZOLAM       | Alprazolam       |
| 49999003915 | ALPRAZOLAM       | Alprazolam       |
| 49999003930 | ALPRAZOLAM       | Alprazolam       |
| 49999003960 | ALPRAZOLAM       | Alprazolam       |
| 49999003990 | ALPRAZOLAM       | Alprazolam       |
| 49999004515 | TEMAZEPAM        | Temazepam        |
| 49999004530 | TEMAZEPAM        | Temazepam        |
| 49999004560 | TEMAZEPAM        | Temazepam        |
| 49999004590 | TEMAZEPAM        | Temazepam        |
| 49999005500 | TRIAZOLAM        | Triazolam        |
| 49999005501 | TRIAZOLAM        | Triazolam        |
| 49999005502 | TRIAZOLAM        | Triazolam        |
| 49999005510 | TRIAZOLAM        | Triazolam        |
| 49999005530 | TRIAZOLAM        | Triazolam        |
| 49999005560 | TRIAZOLAM        | Triazolam        |
| 49999012201 | LORAZEPAM        | Lorazepam        |
| 49999012214 | LORAZEPAM        | Lorazepam        |
| 49999012220 | LORAZEPAM        | Lorazepam        |
| 49999012230 | LORAZEPAM        | Lorazepam        |
| 49999012260 | LORAZEPAM        | Lorazepam        |
| 49999012290 | LORAZEPAM        | Lorazepam        |
| 49999017510 | HALCION          | Triazolam        |
| 49999017530 | HALCION          | Triazolam        |
| 49999017560 | HALCION          | Triazolam        |
| 49999017590 | HALCION          | Triazolam        |
|             | CHLORDIAZEPOXIDE | Chlordiazepoxide |
| 49999021450 | HCL              | Hydrochloride    |
|             | CHLORDIAZEPOXIDE | Chlordiazepoxide |
| 49999024410 | HCL              | Hydrochloride    |
|             | CHLORDIAZEPOXIDE | Chlordiazepoxide |
| 49999024420 | HCL              | Hydrochloride    |
|             | CHLORDIAZEPOXIDE | Chlordiazepoxide |
| 49999024430 | HCL              | Hydrochloride    |
| 49999025200 | ALPRAZOLAM       | Alprazolam       |
| 49999025202 | ALPRAZOLAM       | Alprazolam       |
| 49999025204 | ALPRAZOLAM       | Alprazolam       |
| 49999025210 | ALPRAZOLAM       | Alprazolam       |
| 49999025230 | ALPRAZOLAM       | Alprazolam       |
| 49999025260 | ALPRAZOLAM       | Alprazolam       |

|             |             |             |
|-------------|-------------|-------------|
| 49999025290 | ALPRAZOLAM  | Alprazolam  |
| 49999025300 | ALPRAZOLAM  | Alprazolam  |
| 49999025360 | ALPRAZOLAM  | Alprazolam  |
| 49999025390 | ALPRAZOLAM  | Alprazolam  |
| 49999026630 | LORAZEPAM   | Lorazepam   |
| 49999031715 | ESTAZOLAM   | Estazolam   |
| 49999034615 | TEMAZEPAM   | Temazepam   |
| 49999034630 | TEMAZEPAM   | Temazepam   |
| 49999034660 | TEMAZEPAM   | Temazepam   |
| 49999034690 | TEMAZEPAM   | Temazepam   |
|             | CLORAZEPATE | Clorazepate |
| 49999067400 | DIPOTASSIUM | Dipotassium |
| 49999080530 | LORAZEPAM   | Lorazepam   |
| 49999080560 | LORAZEPAM   | Lorazepam   |
|             | CLORAZEPATE | Clorazepate |
| 50111098601 | DIPOTASSIUM | Dipotassium |
|             | CLORAZEPATE | Clorazepate |
| 50111098602 | DIPOTASSIUM | Dipotassium |
|             | CLORAZEPATE | Clorazepate |
| 50111098701 | DIPOTASSIUM | Dipotassium |
|             | CLORAZEPATE | Clorazepate |
| 50111098702 | DIPOTASSIUM | Dipotassium |
|             | CLORAZEPATE | Clorazepate |
| 50111098801 | DIPOTASSIUM | Dipotassium |
| 50268050915 | LORAZEPAM   | Lorazepam   |
| 50272044510 | DIAZEPAM    | Diazepam    |
|             | CLORAZEPATE | Clorazepate |
| 50349005301 | DIPOTASSIUM | Dipotassium |
|             | CLORAZEPATE | Clorazepate |
| 50349005305 | DIPOTASSIUM | Dipotassium |
|             | CLORAZEPATE | Clorazepate |
| 50349005310 | DIPOTASSIUM | Dipotassium |
|             | CLORAZEPATE | Clorazepate |
| 50349005401 | DIPOTASSIUM | Dipotassium |
|             | CLORAZEPATE | Clorazepate |
| 50349005405 | DIPOTASSIUM | Dipotassium |
|             | CLORAZEPATE | Clorazepate |
| 50349005410 | DIPOTASSIUM | Dipotassium |
|             | CLORAZEPATE | Clorazepate |
| 50349005501 | DIPOTASSIUM | Dipotassium |
|             | CLORAZEPATE | Clorazepate |
| 50349005505 | DIPOTASSIUM | Dipotassium |
|             | CLORAZEPATE | Clorazepate |
| 50349005510 | DIPOTASSIUM | Dipotassium |
| 50349005601 | LORAZEPAM   | Lorazepam   |
| 50349005605 | LORAZEPAM   | Lorazepam   |

|             |                            |                            |
|-------------|----------------------------|----------------------------|
| 50349005610 | LORAZEPAM                  | Lorazepam                  |
| 50349005801 | LORAZEPAM                  | Lorazepam                  |
| 50349005805 | LORAZEPAM                  | Lorazepam                  |
| 50349005810 | LORAZEPAM                  | Lorazepam                  |
| 50349006001 | LORAZEPAM                  | Lorazepam                  |
| 50349006005 | LORAZEPAM                  | Lorazepam                  |
| 50349006010 | LORAZEPAM                  | Lorazepam                  |
| 50349010901 | OXAZEPAM                   | Oxazepam                   |
| 50349010905 | OXAZEPAM                   | Oxazepam                   |
| 50349010910 | OXAZEPAM                   | Oxazepam                   |
| 50349011001 | OXAZEPAM                   | Oxazepam                   |
| 50349011005 | OXAZEPAM                   | Oxazepam                   |
| 50349011010 | OXAZEPAM                   | Oxazepam                   |
| 50349011301 | OXAZEPAM                   | Oxazepam                   |
| 50349011305 | OXAZEPAM                   | Oxazepam                   |
| 50349011310 | OXAZEPAM                   | Oxazepam                   |
|             | CLORAZEPATE                | Clorazepate                |
| 50349015601 | DIPOTASSIUM<br>CLORAZEPATE | Dipotassium<br>Clorazepate |
| 50349015605 | DIPOTASSIUM<br>CLORAZEPATE | Dipotassium<br>Clorazepate |
| 50349015610 | DIPOTASSIUM<br>CLORAZEPATE | Dipotassium<br>Clorazepate |
| 50349015701 | DIPOTASSIUM<br>CLORAZEPATE | Dipotassium<br>Clorazepate |
| 50349015705 | DIPOTASSIUM<br>CLORAZEPATE | Dipotassium<br>Clorazepate |
| 50349015710 | DIPOTASSIUM<br>CLORAZEPATE | Dipotassium<br>Clorazepate |
| 50349015801 | DIPOTASSIUM<br>CLORAZEPATE | Dipotassium<br>Clorazepate |
| 50349015805 | DIPOTASSIUM<br>CLORAZEPATE | Dipotassium<br>Clorazepate |
| 50349015810 | DIPOTASSIUM                | Dipotassium                |
| 50383070530 | LORAZEPAM                  | Lorazepam                  |
| 50436040501 | QUAZEPAM                   | Quazepam                   |
| 50436359201 | DIAZEPAM                   | Diazepam                   |
| 50436359202 | DIAZEPAM                   | Diazepam                   |
| 50436359204 | DIAZEPAM                   | Diazepam                   |
| 50436359301 | DIAZEPAM                   | Diazepam                   |
| 50436359302 | DIAZEPAM                   | Diazepam                   |
| 50436395901 | LORAZEPAM                  | Lorazepam                  |
| 50436395902 | LORAZEPAM                  | Lorazepam                  |
| 50436396001 | LORAZEPAM                  | Lorazepam                  |
| 50436396002 | LORAZEPAM                  | Lorazepam                  |

|             |                  |                                   |
|-------------|------------------|-----------------------------------|
| 50436396101 | LORAZEPAM        | Lorazepam                         |
| 50436462801 | TEMAZEPAM        | Temazepam                         |
| 50436462802 | TEMAZEPAM        | Temazepam                         |
| 50436462901 | TEMAZEPAM        | Temazepam                         |
| 50436462902 | TEMAZEPAM        | Temazepam                         |
| 50436463001 | TEMAZEPAM        | Temazepam                         |
| 50436463302 | ALPRAZOLAM       | Alprazolam                        |
| 50436463303 | ALPRAZOLAM       | Alprazolam                        |
| 50436463401 | ALPRAZOLAM       | Alprazolam                        |
| 50436463402 | ALPRAZOLAM       | Alprazolam                        |
| 50436463501 | ALPRAZOLAM       | Alprazolam                        |
| 50436463502 | ALPRAZOLAM       | Alprazolam                        |
| 50436463601 | ALPRAZOLAM       | Alprazolam                        |
| 50436463602 | ALPRAZOLAM       | Alprazolam                        |
| 50436463603 | ALPRAZOLAM       | Alprazolam                        |
| 50436903601 | TRIAZOLAM        | Triazolam                         |
| 50745024500 | CHLORDIA-XE      | Chlordiazepoxide<br>Hydrochloride |
| 50745024700 | CHLORDIA-XE      | Chlordiazepoxide<br>Hydrochloride |
| 50752027106 | TEMAZEPAM        | Temazepam                         |
| 50752027205 | TEMAZEPAM        | Temazepam                         |
| 50752027206 | TEMAZEPAM        | Temazepam                         |
| 50752027208 | TEMAZEPAM        | Temazepam                         |
| 50752027305 | TEMAZEPAM        | Temazepam                         |
| 50752027306 | TEMAZEPAM        | Temazepam                         |
| 50752027308 | TEMAZEPAM        | Temazepam                         |
| 50752029305 | LORAZEPAM        | Lorazepam                         |
| 50752029308 | LORAZEPAM        | Lorazepam                         |
| 50752029309 | LORAZEPAM        | Lorazepam                         |
| 50752029405 | LORAZEPAM        | Lorazepam                         |
| 50752029408 | LORAZEPAM        | Lorazepam                         |
| 50752029409 | LORAZEPAM        | Lorazepam                         |
| 50752029505 | LORAZEPAM        | Lorazepam                         |
| 50752029508 | LORAZEPAM        | Lorazepam                         |
| 50752029509 | LORAZEPAM        | Lorazepam                         |
| 50962077557 | TEMAZEPAM        | Temazepam                         |
|             | CHLORDIAZEPOXIDE | Chlordiazepoxide                  |
| 51079014101 | HCL              | Hydrochloride                     |
|             | CHLORDIAZEPOXIDE | Chlordiazepoxide                  |
| 51079014120 | HCL              | Hydrochloride                     |
|             | CHLORDIAZEPOXIDE | Chlordiazepoxide                  |
| 51079014121 | HCL              | Hydrochloride                     |
| 51079014160 | CHLORDIAZEPOXIDE | Chlordiazepoxide                  |

|             |                  |                  |
|-------------|------------------|------------------|
|             | HCL              | Hydrochloride    |
| 51079028401 | DIAZEPAM         | Diazepam         |
| 51079028420 | DIAZEPAM         | Diazepam         |
| 51079028421 | DIAZEPAM         | Diazepam         |
| 51079028440 | DIAZEPAM         | Diazepam         |
| 51079028460 | DIAZEPAM         | Diazepam         |
| 51079028501 | DIAZEPAM         | Diazepam         |
| 51079028520 | DIAZEPAM         | Diazepam         |
| 51079028521 | DIAZEPAM         | Diazepam         |
| 51079028524 | DIAZEPAM         | Diazepam         |
| 51079028540 | DIAZEPAM         | Diazepam         |
| 51079028560 | DIAZEPAM         | Diazepam         |
| 51079028598 | DIAZEPAM         | Diazepam         |
| 51079028601 | DIAZEPAM         | Diazepam         |
| 51079028620 | DIAZEPAM         | Diazepam         |
| 51079028621 | DIAZEPAM         | Diazepam         |
| 51079028640 | DIAZEPAM         | Diazepam         |
| 51079028660 | DIAZEPAM         | Diazepam         |
|             |                  | Flurazepam       |
| 51079030201 | FLURAZEPAM HCL   | Hydrochloride    |
|             |                  | Flurazepam       |
| 51079030220 | FLURAZEPAM HCL   | Hydrochloride    |
|             |                  | Flurazepam       |
| 51079030221 | FLURAZEPAM HCL   | Hydrochloride    |
|             |                  | Flurazepam       |
| 51079030250 | FLURAZEPAM HCL   | Hydrochloride    |
|             |                  | Flurazepam       |
| 51079030320 | FLURAZEPAM HCL   | Hydrochloride    |
|             |                  | Flurazepam       |
| 51079030321 | FLURAZEPAM HCL   | Hydrochloride    |
|             |                  | Flurazepam       |
| 51079030350 | FLURAZEPAM HCL   | Hydrochloride    |
|             | CHLORDIAZEPOXIDE | Chlordiazepoxide |
| 51079037401 | HCL              | Hydrochloride    |
|             | CHLORDIAZEPOXIDE | Chlordiazepoxide |
| 51079037420 | HCL              | Hydrochloride    |
|             | CHLORDIAZEPOXIDE | Chlordiazepoxide |
| 51079037421 | HCL              | Hydrochloride    |
|             | CHLORDIAZEPOXIDE | Chlordiazepoxide |
| 51079037501 | HCL              | Hydrochloride    |
|             | CHLORDIAZEPOXIDE | Chlordiazepoxide |
| 51079037520 | HCL              | Hydrochloride    |
|             | CHLORDIAZEPOXIDE | Chlordiazepoxide |
| 51079037521 | HCL              | Hydrochloride    |
| 51079038601 | LORAZEPAM        | Lorazepam        |

|             |                            |                            |
|-------------|----------------------------|----------------------------|
| 51079038619 | LORAZEPAM                  | Lorazepam                  |
| 51079038620 | LORAZEPAM                  | Lorazepam                  |
| 51079038621 | LORAZEPAM                  | Lorazepam                  |
| 51079038624 | LORAZEPAM                  | Lorazepam                  |
| 51079038630 | LORAZEPAM                  | Lorazepam                  |
| 51079038656 | LORAZEPAM                  | Lorazepam                  |
| 51079038699 | LORAZEPAM                  | Lorazepam                  |
| 51079038701 | LORAZEPAM                  | Lorazepam                  |
| 51079038720 | LORAZEPAM                  | Lorazepam                  |
| 51079038721 | LORAZEPAM                  | Lorazepam                  |
| 51079038756 | LORAZEPAM                  | Lorazepam                  |
| 51079041701 | LORAZEPAM                  | Lorazepam                  |
| 51079041719 | LORAZEPAM                  | Lorazepam                  |
| 51079041720 | LORAZEPAM                  | Lorazepam                  |
| 51079041721 | LORAZEPAM                  | Lorazepam                  |
| 51079041724 | LORAZEPAM                  | Lorazepam                  |
| 51079041730 | LORAZEPAM                  | Lorazepam                  |
| 51079041756 | LORAZEPAM                  | Lorazepam                  |
| 51079041799 | LORAZEPAM                  | Lorazepam                  |
| 51079041801 | TEMAZEPAM                  | Temazepam                  |
| 51079041819 | TEMAZEPAM                  | Temazepam                  |
| 51079041820 | TEMAZEPAM                  | Temazepam                  |
| 51079041821 | TEMAZEPAM                  | Temazepam                  |
| 51079041901 | TEMAZEPAM                  | Temazepam                  |
| 51079041920 | TEMAZEPAM                  | Temazepam                  |
| 51079041921 | TEMAZEPAM                  | Temazepam                  |
| 51079047820 | OXAZEPAM                   | Oxazepam                   |
| 51079047821 | OXAZEPAM                   | Oxazepam                   |
| 51079047920 | OXAZEPAM                   | Oxazepam                   |
| 51079047921 | OXAZEPAM                   | Oxazepam                   |
|             | CLORAZEPATE                | Clorazepate                |
| 51079063320 | DIPOTASSIUM<br>CLORAZEPATE | Dipotassium<br>Clorazepate |
| 51079063420 | DIPOTASSIUM<br>CLORAZEPATE | Dipotassium<br>Clorazepate |
| 51079063520 | DIPOTASSIUM                | Dipotassium                |
| 51079078801 | ALPRAZOLAM                 | Alprazolam                 |
| 51079078819 | ALPRAZOLAM                 | Alprazolam                 |
| 51079078820 | ALPRAZOLAM                 | Alprazolam                 |
| 51079078821 | ALPRAZOLAM                 | Alprazolam                 |
| 51079078901 | ALPRAZOLAM                 | Alprazolam                 |
| 51079078920 | ALPRAZOLAM                 | Alprazolam                 |
| 51079078921 | ALPRAZOLAM                 | Alprazolam                 |

|             |                            |                            |
|-------------|----------------------------|----------------------------|
| 51079079001 | ALPRAZOLAM                 | Alprazolam                 |
| 51079079020 | ALPRAZOLAM                 | Alprazolam                 |
| 51079079021 | ALPRAZOLAM                 | Alprazolam                 |
| 51079084320 | TRIAZOLAM                  | Triazolam                  |
| 51079084420 | TRIAZOLAM                  | Triazolam                  |
| 51285062102 | DIAZEPAM                   | Diazepam                   |
| 51285062104 | DIAZEPAM                   | Diazepam                   |
| 51285062105 | DIAZEPAM                   | Diazepam                   |
| 51285062202 | DIAZEPAM                   | Diazepam                   |
| 51285062204 | DIAZEPAM                   | Diazepam                   |
| 51285062205 | DIAZEPAM                   | Diazepam                   |
| 51285062302 | DIAZEPAM                   | Diazepam                   |
| 51285062304 | DIAZEPAM                   | Diazepam                   |
| 51285062305 | DIAZEPAM                   | Diazepam                   |
|             | CLORAZEPATE                | Clorazepate                |
| 51285063102 | DIPOTASSIUM<br>CLORAZEPATE | Dipotassium<br>Clorazepate |
| 51285063104 | DIPOTASSIUM<br>CLORAZEPATE | Dipotassium<br>Clorazepate |
| 51285063202 | DIPOTASSIUM<br>CLORAZEPATE | Dipotassium<br>Clorazepate |
| 51285063204 | DIPOTASSIUM<br>CLORAZEPATE | Dipotassium<br>Clorazepate |
| 51285063302 | DIPOTASSIUM<br>CLORAZEPATE | Dipotassium<br>Clorazepate |
| 51285063304 | DIPOTASSIUM                | Dipotassium                |
| 51285063802 | LORAZEPAM                  | Lorazepam                  |
| 51285063804 | LORAZEPAM                  | Lorazepam                  |
| 51285063902 | LORAZEPAM                  | Lorazepam                  |
| 51285063904 | LORAZEPAM                  | Lorazepam                  |
| 51285063905 | LORAZEPAM                  | Lorazepam                  |
| 51285064002 | LORAZEPAM                  | Lorazepam                  |
| 51285064004 | LORAZEPAM                  | Lorazepam                  |
| 51285064005 | LORAZEPAM                  | Lorazepam                  |
| 51285064702 | LORAZEPAM                  | Lorazepam                  |
| 51285064704 | LORAZEPAM                  | Lorazepam                  |
| 51285064802 | LORAZEPAM                  | Lorazepam                  |
| 51285064804 | LORAZEPAM                  | Lorazepam                  |
| 51285064902 | LORAZEPAM                  | Lorazepam                  |
| 51285064904 | LORAZEPAM                  | Lorazepam                  |
| 51285066002 | TEMAZEPAM                  | Temazepam                  |
| 51285066004 | TEMAZEPAM                  | Temazepam                  |
| 51285066102 | TEMAZEPAM                  | Temazepam                  |
| 51285066104 | TEMAZEPAM                  | Temazepam                  |

|             |                            |                                   |
|-------------|----------------------------|-----------------------------------|
| 51432006600 | CHLORDIAZEPOXIDE<br>HCL    | Chlordiazepoxide<br>Hydrochloride |
| 51432006603 | CHLORDIAZEPOXIDE<br>HCL    | Chlordiazepoxide<br>Hydrochloride |
| 51432006605 | CHLORDIAZEPOXIDE<br>HCL    | Chlordiazepoxide<br>Hydrochloride |
| 51432006803 | CHLORDIAZEPOXIDE<br>HCL    | Chlordiazepoxide<br>Hydrochloride |
| 51432006805 | CHLORDIAZEPOXIDE<br>HCL    | Chlordiazepoxide<br>Hydrochloride |
| 51432006806 | CHLORDIAZEPOXIDE<br>HCL    | Chlordiazepoxide<br>Hydrochloride |
| 51432007000 | CHLORDIAZEPOXIDE<br>HCL    | Chlordiazepoxide<br>Hydrochloride |
| 51432007003 | CHLORDIAZEPOXIDE<br>HCL    | Chlordiazepoxide<br>Hydrochloride |
| 51432007005 | CHLORDIAZEPOXIDE<br>HCL    | Chlordiazepoxide<br>Hydrochloride |
| 51432018503 | FLURAZEPAM HCL             | Flurazepam<br>Hydrochloride       |
| 51432018505 | FLURAZEPAM HCL             | Flurazepam<br>Hydrochloride       |
| 51432018703 | FLURAZEPAM HCL             | Flurazepam<br>Hydrochloride       |
| 51432018705 | FLURAZEPAM HCL             | Flurazepam<br>Hydrochloride       |
| 51432032603 | OXAZEPAM                   | Oxazepam                          |
| 51432032703 | OXAZEPAM                   | Oxazepam                          |
| 51432033103 | OXAZEPAM                   | Oxazepam                          |
| 51432054703 | CLORAZEPATE<br>DIPOTASSIUM | Clorazepate<br>Dipotassium        |
| 51432054903 | CLORAZEPATE<br>DIPOTASSIUM | Clorazepate<br>Dipotassium        |
| 51432055103 | CLORAZEPATE<br>DIPOTASSIUM | Clorazepate<br>Dipotassium        |
| 51432067903 | TEMAZEPAM                  | Temazepam                         |
| 51432067905 | TEMAZEPAM                  | Temazepam                         |
| 51432068103 | TEMAZEPAM                  | Temazepam                         |
| 51432068105 | TEMAZEPAM                  | Temazepam                         |
| 51432099103 | DIAZEPAM                   | Diazepam                          |
| 51432099105 | DIAZEPAM                   | Diazepam                          |
| 51432099106 | DIAZEPAM                   | Diazepam                          |
| 51432099203 | DIAZEPAM                   | Diazepam                          |
| 51432099205 | DIAZEPAM                   | Diazepam                          |
| 51432099206 | DIAZEPAM                   | Diazepam                          |
| 51432099303 | DIAZEPAM                   | Diazepam                          |

|             |            |             |
|-------------|------------|-------------|
| 51432099305 | DIAZEPAM   | Diazepam    |
| 51432099306 | DIAZEPAM   | Diazepam    |
| 51432099503 | LORAZEPAM  | Lorazepam   |
| 51432099505 | LORAZEPAM  | Lorazepam   |
| 51432099603 | LORAZEPAM  | Lorazepam   |
| 51432099605 | LORAZEPAM  | Lorazepam   |
| 51432099703 | LORAZEPAM  | Lorazepam   |
| 51432099705 | LORAZEPAM  | Lorazepam   |
| 51552053704 | ALPRAZOLAM | Alprazolam  |
| 51552053705 | ALPRAZOLAM | Alprazolam  |
| 51552053725 | ALPRAZOLAM | Alprazolam  |
| 51552072901 | LORAZEPAM  | Lorazepam   |
| 51552072902 | LORAZEPAM  | Lorazepam   |
| 51552072904 | LORAZEPAM  | Lorazepam   |
| 51552072905 | LORAZEPAM  | Lorazepam   |
| 51552072909 | LORAZEPAM  | Lorazepam   |
| 51552102309 | MIDAZOLAM  | Midazolam   |
| 51552102502 | DIAZEPAM   | Diazepam    |
| 51552102504 | DIAZEPAM   | Diazepam    |
| 51552102505 | DIAZEPAM   | Diazepam    |
| 51552133002 | DIAZEPAM   | Diazepam    |
| 51552133004 | DIAZEPAM   | Diazepam    |
| 51552133005 | DIAZEPAM   | Diazepam    |
|             |            | Clorazepate |
| 51641024201 | GEN-XENE   | Dipotassium |
|             |            | Clorazepate |
| 51641024203 | GEN-XENE   | Dipotassium |
|             |            | Clorazepate |
| 51641024205 | GEN-XENE   | Dipotassium |
|             |            | Clorazepate |
| 51641024211 | GEN-XENE   | Dipotassium |
|             |            | Clorazepate |
| 51641024301 | GEN-XENE   | Dipotassium |
|             |            | Clorazepate |
| 51641024303 | GEN-XENE   | Dipotassium |
|             |            | Clorazepate |
| 51641024305 | GEN-XENE   | Dipotassium |
|             |            | Clorazepate |
| 51641024311 | GEN-XENE   | Dipotassium |
|             |            | Clorazepate |
| 51641024401 | GEN-XENE   | Dipotassium |
|             |            | Clorazepate |
| 51641024403 | GEN-XENE   | Dipotassium |
|             |            | Clorazepate |
| 51641024405 | GEN-XENE   | Dipotassium |

|             |                  |                  |
|-------------|------------------|------------------|
| 51641024411 | GEN-XENE         | Clorazepate      |
|             | CHLORDIAZEPOXIDE | Dipotassium      |
| 51655005225 | HCL              | Chlordiazepoxide |
|             | CHLORDIAZEPOXIDE | Hydrochloride    |
| 51655005226 | HCL              | Chlordiazepoxide |
|             | CHLORDIAZEPOXIDE | Hydrochloride    |
| 51655005282 | HCL              | Chlordiazepoxide |
| 51655080024 | LORAZEPAM        | Hydrochloride    |
| 51655080025 | LORAZEPAM        | Lorazepam        |
| 51655080124 | DIAZEPAM         | Lorazepam        |
| 51655080125 | DIAZEPAM         | Diazepam         |
| 51655080126 | DIAZEPAM         | Diazepam         |
| 51655080153 | DIAZEPAM         | Diazepam         |
| 51655080182 | DIAZEPAM         | Diazepam         |
| 51655082024 | LORAZEPAM        | Diazepam         |
| 51655082025 | LORAZEPAM        | Lorazepam        |
| 51655082124 | LORAZEPAM        | Lorazepam        |
| 51655082125 | LORAZEPAM        | Lorazepam        |
| 51655082224 | LORAZEPAM        | Lorazepam        |
| 51655082225 | LORAZEPAM        | Lorazepam        |
| 51655082226 | LORAZEPAM        | Lorazepam        |
| 51655082253 | LORAZEPAM        | Lorazepam        |
| 51655082282 | LORAZEPAM        | Lorazepam        |
|             | CHLORDIAZEPOXIDE | Lorazepam        |
| 51655082326 | HCL              | Chlordiazepoxide |
|             | CHLORDIAZEPOXIDE | Hydrochloride    |
| 51655082382 | HCL              | Chlordiazepoxide |
| 51655082424 | LORAZEPAM        | Hydrochloride    |
| 51655082425 | LORAZEPAM        | Lorazepam        |
| 51655082426 | LORAZEPAM        | Lorazepam        |
| 51655082482 | LORAZEPAM        | Lorazepam        |
|             |                  | Flurazepam       |
| 51655082524 | FLURAZEPAM HCL   | Hydrochloride    |
| 51655083124 | LORAZEPAM        | Lorazepam        |
| 51655083324 | DIAZEPAM         | Diazepam         |
| 51655083325 | DIAZEPAM         | Diazepam         |
| 51655083326 | DIAZEPAM         | Diazepam         |
| 51655083382 | DIAZEPAM         | Diazepam         |
| 51655083480 | DIAZEPAM         | Diazepam         |
| 51655083589 | TRIAZOLAM        | Triazolam        |
|             |                  | Flurazepam       |
| 51655084224 | FLURAZEPAM HCL   | Hydrochloride    |
|             |                  | Flurazepam       |
| 51655084225 | FLURAZEPAM HCL   | Hydrochloride    |

|             |                  |                  |
|-------------|------------------|------------------|
| 51655084524 | TEMAZEPAM        | Temazepam        |
| 51655085424 | OXAZEPAM         | Oxazepam         |
| 51655085426 | OXAZEPAM         | Oxazepam         |
| 51655085524 | OXAZEPAM         | Oxazepam         |
| 51655085624 | TEMAZEPAM        | Temazepam        |
| 51655086024 | ALPRAZOLAM       | Alprazolam       |
| 51655086025 | ALPRAZOLAM       | Alprazolam       |
| 51655086026 | ALPRAZOLAM       | Alprazolam       |
| 51655086082 | ALPRAZOLAM       | Alprazolam       |
| 51655086124 | ALPRAZOLAM       | Alprazolam       |
| 51655086125 | ALPRAZOLAM       | Alprazolam       |
| 51655086126 | ALPRAZOLAM       | Alprazolam       |
| 51655086324 | ALPRAZOLAM       | Alprazolam       |
| 51655086325 | ALPRAZOLAM       | Alprazolam       |
| 51655086326 | ALPRAZOLAM       | Alprazolam       |
| 51655086382 | ALPRAZOLAM       | Alprazolam       |
|             | CLORAZEPATE      | Clorazepate      |
| 51672404201 | DIPOTASSIUM      | Dipotassium      |
|             | CLORAZEPATE      | Clorazepate      |
| 51672404202 | DIPOTASSIUM      | Dipotassium      |
|             | CLORAZEPATE      | Clorazepate      |
| 51672404301 | DIPOTASSIUM      | Dipotassium      |
|             | CLORAZEPATE      | Clorazepate      |
| 51672404302 | DIPOTASSIUM      | Dipotassium      |
|             | CLORAZEPATE      | Clorazepate      |
| 51672404401 | DIPOTASSIUM      | Dipotassium      |
|             | CHLORDIAZEPOXIDE | Chlordiazepoxide |
| 51728025210 | HCL              | Hydrochloride    |
|             | CHLORDIAZEPOXIDE | Chlordiazepoxide |
| 51728025310 | HCL              | Hydrochloride    |
|             | CHLORDIAZEPOXIDE | Chlordiazepoxide |
| 51728025410 | HCL              | Hydrochloride    |
| 51862006201 | DIAZEPAM         | Diazepam         |
| 51862006205 | DIAZEPAM         | Diazepam         |
| 51862006210 | DIAZEPAM         | Diazepam         |
| 51862006301 | DIAZEPAM         | Diazepam         |
| 51862006305 | DIAZEPAM         | Diazepam         |
| 51862006310 | DIAZEPAM         | Diazepam         |
| 51862006401 | DIAZEPAM         | Diazepam         |
| 51862006405 | DIAZEPAM         | Diazepam         |
| 51862006410 | DIAZEPAM         | Diazepam         |
| 51862006901 | ESTAZOLAM        | Estazolam        |
| 51862007001 | ESTAZOLAM        | Estazolam        |
| 51875024001 | LORAZEPAM        | Lorazepam        |

|             |            |            |
|-------------|------------|------------|
| 51875024002 | LORAZEPAM  | Lorazepam  |
| 51875024004 | LORAZEPAM  | Lorazepam  |
| 51875024101 | LORAZEPAM  | Lorazepam  |
| 51875024102 | LORAZEPAM  | Lorazepam  |
| 51875024104 | LORAZEPAM  | Lorazepam  |
| 51875024201 | LORAZEPAM  | Lorazepam  |
| 51875024202 | LORAZEPAM  | Lorazepam  |
| 51875024204 | LORAZEPAM  | Lorazepam  |
| 51875036301 | ALPRAZOLAM | Alprazolam |
| 51875036302 | ALPRAZOLAM | Alprazolam |
| 51875036304 | ALPRAZOLAM | Alprazolam |
| 51875036401 | ALPRAZOLAM | Alprazolam |
| 51875036402 | ALPRAZOLAM | Alprazolam |
| 51875036404 | ALPRAZOLAM | Alprazolam |
| 51875036501 | ALPRAZOLAM | Alprazolam |
| 51875036502 | ALPRAZOLAM | Alprazolam |
| 51875036504 | ALPRAZOLAM | Alprazolam |
| 51927100500 | LORAZEPAM  | Lorazepam  |
| 51927101400 | DIAZEPAM   | Diazepam   |
| 51927326500 | MIDAZOLAM  | Midazolam  |
| 51927417200 | OXAZEPAM   | Oxazepam   |
| 51927470500 | MIDAZOLAM  | Midazolam  |
| 52273015601 | LORAZ      | Lorazepam  |
| 52273015605 | LORAZ      | Lorazepam  |
| 52273015701 | LORAZ      | Lorazepam  |
| 52273015705 | LORAZ      | Lorazepam  |
| 52273015710 | LORAZ      | Lorazepam  |
| 52273015801 | LORAZ      | Lorazepam  |
| 52273015805 | LORAZ      | Lorazepam  |
| 52273015810 | LORAZ      | Lorazepam  |
| 52273018101 | Q-PAM      | Diazepam   |
| 52273018105 | Q-PAM      | Diazepam   |
| 52273018110 | Q-PAM      | Diazepam   |
| 52273018201 | Q-PAM      | Diazepam   |
| 52273018205 | Q-PAM      | Diazepam   |
| 52273018210 | Q-PAM      | Diazepam   |
| 52273018301 | Q-PAM      | Diazepam   |
| 52273018305 | Q-PAM      | Diazepam   |
| 52273018310 | Q-PAM      | Diazepam   |
| 52273019201 | TEMAZ      | Temazepam  |
| 52273019205 | TEMAZ      | Temazepam  |
| 52273019301 | TEMAZ      | Temazepam  |
| 52273019305 | TEMAZ      | Temazepam  |

|             |                  |                  |
|-------------|------------------|------------------|
| 52273020701 | OXAZEPAM         | Oxazepam         |
| 52273020705 | OXAZEPAM         | Oxazepam         |
| 52273020801 | OXAZEPAM         | Oxazepam         |
| 52273020805 | OXAZEPAM         | Oxazepam         |
| 52273020901 | OXAZEPAM         | Oxazepam         |
| 52273020905 | OXAZEPAM         | Oxazepam         |
|             | CLORAZEPATE      | Clorazepate      |
| 52273022501 | DIPOTASSIUM      | Dipotassium      |
|             | CLORAZEPATE      | Clorazepate      |
| 52273022505 | DIPOTASSIUM      | Dipotassium      |
|             | CLORAZEPATE      | Clorazepate      |
| 52273022601 | DIPOTASSIUM      | Dipotassium      |
|             | CLORAZEPATE      | Clorazepate      |
| 52273022605 | DIPOTASSIUM      | Dipotassium      |
|             | CLORAZEPATE      | Clorazepate      |
| 52273022701 | DIPOTASSIUM      | Dipotassium      |
| 52406090101 | LORAZEPAM        | Lorazepam        |
| 52406090105 | LORAZEPAM        | Lorazepam        |
| 52406090205 | LORAZEPAM        | Lorazepam        |
| 52406090210 | LORAZEPAM        | Lorazepam        |
| 52406090301 | LORAZEPAM        | Lorazepam        |
| 52406090305 | LORAZEPAM        | Lorazepam        |
|             | CHLORDIAZEPOXIDE | Chlordiazepoxide |
| 52406095801 | HCL              | Hydrochloride    |
|             | CHLORDIAZEPOXIDE | Chlordiazepoxide |
| 52406095810 | HCL              | Hydrochloride    |
|             | CHLORDIAZEPOXIDE | Chlordiazepoxide |
| 52406095901 | HCL              | Hydrochloride    |
|             | CHLORDIAZEPOXIDE | Chlordiazepoxide |
| 52406095905 | HCL              | Hydrochloride    |
|             | CHLORDIAZEPOXIDE | Chlordiazepoxide |
| 52406095910 | HCL              | Hydrochloride    |
|             | CHLORDIAZEPOXIDE | Chlordiazepoxide |
| 52406096001 | HCL              | Hydrochloride    |
|             | CHLORDIAZEPOXIDE | Chlordiazepoxide |
| 52406096010 | HCL              | Hydrochloride    |
| 52406098701 | TEMAZEPAM        | Inactive Record  |
| 52406098705 | TEMAZEPAM        | Inactive Record  |
| 52406098801 | TEMAZEPAM        | Inactive Record  |
| 52406098805 | TEMAZEPAM        | Inactive Record  |
| 52406099505 | DIAZEPAM         | Diazepam         |
| 52406099601 | DIAZEPAM         | Diazepam         |
| 52406099610 | DIAZEPAM         | Diazepam         |
| 52406099710 | DIAZEPAM         | Diazepam         |
| 52446008921 | CLORAZEPATE      | Clorazepate      |

|             |             |             |
|-------------|-------------|-------------|
|             | DIPOTASSIUM | Dipotassium |
|             | CLORAZEPATE | Clorazepate |
| 52446009021 | DIPOTASSIUM | Dipotassium |
| 52544024001 | LORAZEPAM   | Lorazepam   |
| 52544024005 | LORAZEPAM   | Lorazepam   |
| 52544024010 | LORAZEPAM   | Lorazepam   |
| 52544024101 | LORAZEPAM   | Lorazepam   |
| 52544024105 | LORAZEPAM   | Lorazepam   |
| 52544024110 | LORAZEPAM   | Lorazepam   |
| 52544024201 | LORAZEPAM   | Lorazepam   |
| 52544024205 | LORAZEPAM   | Lorazepam   |
| 52544024210 | LORAZEPAM   | Lorazepam   |
| 52544033201 | LORAZEPAM   | Lorazepam   |
| 52544033205 | LORAZEPAM   | Lorazepam   |
| 52544033210 | LORAZEPAM   | Lorazepam   |
| 52544033301 | LORAZEPAM   | Lorazepam   |
| 52544033305 | LORAZEPAM   | Lorazepam   |
| 52544033310 | LORAZEPAM   | Lorazepam   |
| 52544033401 | LORAZEPAM   | Lorazepam   |
| 52544033405 | LORAZEPAM   | Lorazepam   |
| 52544033410 | LORAZEPAM   | Lorazepam   |
|             | CLORAZEPATE | Clorazepate |
| 52544036301 | DIPOTASSIUM | Dipotassium |
|             | CLORAZEPATE | Clorazepate |
| 52544036305 | DIPOTASSIUM | Dipotassium |
|             | CLORAZEPATE | Clorazepate |
| 52544036401 | DIPOTASSIUM | Dipotassium |
|             | CLORAZEPATE | Clorazepate |
| 52544036405 | DIPOTASSIUM | Dipotassium |
|             | CLORAZEPATE | Clorazepate |
| 52544036501 | DIPOTASSIUM | Dipotassium |
|             | CLORAZEPATE | Clorazepate |
| 52544036505 | DIPOTASSIUM | Dipotassium |
| 52544068201 | ALPRAZOLAM  | Alprazolam  |
| 52544068205 | ALPRAZOLAM  | Alprazolam  |
| 52544068210 | ALPRAZOLAM  | Alprazolam  |
| 52544068301 | ALPRAZOLAM  | Alprazolam  |
| 52544068305 | ALPRAZOLAM  | Alprazolam  |
| 52544068310 | ALPRAZOLAM  | Alprazolam  |
| 52544068401 | ALPRAZOLAM  | Alprazolam  |
| 52544068405 | ALPRAZOLAM  | Alprazolam  |
| 52544068410 | ALPRAZOLAM  | Alprazolam  |
| 52544074401 | ESTAZOLAM   | Estazolam   |
| 52544074501 | ESTAZOLAM   | Estazolam   |

|             |                            |                                                        |
|-------------|----------------------------|--------------------------------------------------------|
| 52544078501 | CHLORDIAZEPOXIDE<br>HCL    | Chlordiazepoxide<br>Hydrochloride                      |
| 52544078505 | CHLORDIAZEPOXIDE<br>HCL    | Chlordiazepoxide<br>Hydrochloride                      |
| 52544078601 | CHLORDIAZEPOXIDE<br>HCL    | Chlordiazepoxide<br>Hydrochloride                      |
| 52544078605 | CHLORDIAZEPOXIDE<br>HCL    | Chlordiazepoxide<br>Hydrochloride                      |
| 52544078610 | CHLORDIAZEPOXIDE<br>HCL    | Chlordiazepoxide<br>Hydrochloride                      |
| 52544078701 | CHLORDIAZEPOXIDE<br>HCL    | Chlordiazepoxide<br>Hydrochloride                      |
| 52544078705 | CHLORDIAZEPOXIDE<br>HCL    | Chlordiazepoxide<br>Hydrochloride                      |
| 52544078801 | CHLORDIAZEPOXIDE<br>HCL    | Chlordiazepoxide<br>Hydrochloride/clidinium<br>Bromide |
| 52544078805 | CHLORDIAZEPOXIDE<br>HCL    | Chlordiazepoxide<br>Hydrochloride/clidinium<br>Bromide |
| 52544078810 | CHLORDIAZEPOXIDE<br>HCL    | Chlordiazepoxide<br>Hydrochloride/clidinium<br>Bromide |
| 52544083501 | CLORAZEPATE<br>DIPOTASSIUM | Clorazepate<br>Dipotassium                             |
| 52544083505 | CLORAZEPATE<br>DIPOTASSIUM | Clorazepate<br>Dipotassium                             |
| 52544083601 | CLORAZEPATE<br>DIPOTASSIUM | Clorazepate<br>Dipotassium                             |
| 52544083605 | CLORAZEPATE<br>DIPOTASSIUM | Clorazepate<br>Dipotassium                             |
| 52544083701 | CLORAZEPATE<br>DIPOTASSIUM | Clorazepate<br>Dipotassium                             |
| 52555005301 | CLORAZEPATE<br>DIPOTASSIUM | Clorazepate<br>Dipotassium                             |
| 52555005305 | CLORAZEPATE<br>DIPOTASSIUM | Clorazepate<br>Dipotassium                             |
| 52555005401 | CLORAZEPATE<br>DIPOTASSIUM | Clorazepate<br>Dipotassium                             |
| 52555005405 | CLORAZEPATE<br>DIPOTASSIUM | Clorazepate<br>Dipotassium                             |
| 52555005501 | CLORAZEPATE<br>DIPOTASSIUM | Clorazepate<br>Dipotassium                             |
| 52555005505 | CLORAZEPATE<br>DIPOTASSIUM | Clorazepate<br>Dipotassium                             |
| 52555015805 | DIPOTASSIUM<br>CLORAZEPATE | Dipotassium<br>Clorazepate                             |
| 52555019001 | DIAZEPAM                   | Diazepam                                               |

|             |                           |                             |
|-------------|---------------------------|-----------------------------|
| 52555019010 | DIAZEPAM                  | Diazepam                    |
| 52555019101 | DIAZEPAM                  | Diazepam                    |
| 52555019110 | DIAZEPAM                  | Diazepam                    |
| 52555019210 | DIAZEPAM                  | Diazepam                    |
| 52555023301 | OXAZEPAM                  | Oxazepam                    |
| 52555023401 | OXAZEPAM                  | Oxazepam                    |
| 52555023501 | OXAZEPAM                  | Oxazepam                    |
| 52555024201 | TEMAZEPAM                 | Temazepam                   |
| 52555024301 | TEMAZEPAM                 | Temazepam                   |
| 52555030301 | FLURAZEPAM HCL            | Hydrochloride<br>Flurazepam |
| 52555030401 | FLURAZEPAM HCL            | Hydrochloride               |
| 52555043005 | LORAZEPAM                 | Lorazepam                   |
| 52555043101 | LORAZEPAM                 | Lorazepam                   |
| 52555043201 | LORAZEPAM                 | Lorazepam                   |
| 52555043205 | LORAZEPAM                 | Lorazepam                   |
| 52555043505 | DIAZEPAM                  | Diazepam                    |
| 52555043605 | DIAZEPAM                  | Diazepam                    |
| 52555043701 | DIAZEPAM                  | Diazepam                    |
| 52555043705 | DIAZEPAM                  | Diazepam                    |
| 52555048501 | LORAZEPAM                 | Lorazepam                   |
| 52555048505 | LORAZEPAM                 | Lorazepam                   |
| 52555048601 | LORAZEPAM                 | Lorazepam                   |
| 52555048605 | LORAZEPAM                 | Lorazepam                   |
| 52555048701 | LORAZEPAM                 | Lorazepam                   |
| 52555048705 | LORAZEPAM                 | Lorazepam                   |
| 52555058901 | ALPRAZOLAM                | Alprazolam                  |
| 52555058905 | ALPRAZOLAM                | Alprazolam                  |
| 52555059001 | ALPRAZOLAM                | Alprazolam                  |
| 52555059005 | ALPRAZOLAM                | Alprazolam                  |
| 52555059101 | ALPRAZOLAM                | Alprazolam                  |
| 52555059105 | ALPRAZOLAM                | Alprazolam                  |
| 52555098601 | CLOAZEPATE                | Clorazepate                 |
| 52555098605 | DIPOTASSIUM<br>CLOAZEPATE | Dipotassium<br>Clorazepate  |
| 52555098701 | DIPOTASSIUM<br>CLOAZEPATE | Dipotassium<br>Clorazepate  |
| 52555098705 | DIPOTASSIUM<br>CLOAZEPATE | Dipotassium<br>Clorazepate  |
| 52555098801 | DIPOTASSIUM<br>CLOAZEPATE | Dipotassium<br>Clorazepate  |
| 52765100300 | X-O SPAZ                  | Diazepam                    |

|             |                |                                   |
|-------------|----------------|-----------------------------------|
| 52765215400 | SPAT-10        | Chlordiazepoxide<br>Hydrochloride |
| 52765230400 | SPAZ-5         | Chlordiazepoxide<br>Hydrochloride |
| 52765230500 | SPAZ-10        | Chlordiazepoxide<br>Hydrochloride |
| 52959004701 | DIAZEPAM       | Diazepam                          |
| 52959004702 | DIAZEPAM       | Diazepam                          |
| 52959004703 | DIAZEPAM       | Diazepam                          |
| 52959004705 | DIAZEPAM       | Diazepam                          |
| 52959004706 | DIAZEPAM       | Diazepam                          |
| 52959004710 | DIAZEPAM       | Diazepam                          |
| 52959004712 | DIAZEPAM       | Diazepam                          |
| 52959004715 | DIAZEPAM       | Diazepam                          |
| 52959004720 | DIAZEPAM       | Diazepam                          |
| 52959004721 | DIAZEPAM       | Diazepam                          |
| 52959004724 | DIAZEPAM       | Diazepam                          |
| 52959004725 | DIAZEPAM       | Diazepam                          |
| 52959004730 | DIAZEPAM       | Diazepam                          |
| 52959004740 | DIAZEPAM       | Diazepam                          |
| 52959004745 | DIAZEPAM       | Diazepam                          |
| 52959004750 | DIAZEPAM       | Diazepam                          |
| 52959004760 | DIAZEPAM       | Diazepam                          |
| 52959004790 | DIAZEPAM       | Diazepam                          |
| 52959016220 | XANAX          | Alprazolam                        |
| 52959023614 | FLURAZEPAM HCL | Flurazepam<br>Hydrochloride       |
| 52959023615 | FLURAZEPAM HCL | Flurazepam<br>Hydrochloride       |
| 52959023620 | FLURAZEPAM HCL | Flurazepam<br>Hydrochloride       |
| 52959023624 | FLURAZEPAM HCL | Flurazepam<br>Hydrochloride       |
| 52959023630 | FLURAZEPAM HCL | Flurazepam<br>Hydrochloride       |
| 52959023660 | FLURAZEPAM HCL | Flurazepam<br>Hydrochloride       |
| 52959029502 | DIAZEPAM       | Diazepam                          |
| 52959029510 | DIAZEPAM       | Diazepam                          |
| 52959029515 | DIAZEPAM       | Diazepam                          |
| 52959029530 | DIAZEPAM       | Diazepam                          |
| 52959029550 | DIAZEPAM       | Diazepam                          |
| 52959030600 | DIAZEPAM       | Diazepam                          |
| 52959030602 | DIAZEPAM       | Diazepam                          |
| 52959030605 | DIAZEPAM       | Diazepam                          |

|             |                |                             |
|-------------|----------------|-----------------------------|
| 52959030606 | DIAZEPAM       | Diazepam                    |
| 52959030610 | DIAZEPAM       | Diazepam                    |
| 52959030615 | DIAZEPAM       | Diazepam                    |
| 52959030620 | DIAZEPAM       | Diazepam                    |
| 52959030628 | DIAZEPAM       | Diazepam                    |
| 52959030630 | DIAZEPAM       | Diazepam                    |
| 52959030645 | DIAZEPAM       | Diazepam                    |
| 52959030660 | DIAZEPAM       | Diazepam                    |
| 52959030690 | DIAZEPAM       | Diazepam                    |
| 52959032100 | ALPRAZOLAM     | Alprazolam                  |
| 52959032102 | ALPRAZOLAM     | Alprazolam                  |
| 52959032110 | ALPRAZOLAM     | Alprazolam                  |
| 52959032114 | ALPRAZOLAM     | Alprazolam                  |
| 52959032120 | ALPRAZOLAM     | Alprazolam                  |
| 52959032130 | ALPRAZOLAM     | Alprazolam                  |
| 52959032160 | ALPRAZOLAM     | Alprazolam                  |
| 52959032190 | ALPRAZOLAM     | Alprazolam                  |
| 52959032230 | XANAX          | Alprazolam                  |
| 52959033100 | LORAZEPAM      | Lorazepam                   |
| 52959033104 | LORAZEPAM      | Lorazepam                   |
| 52959033105 | LORAZEPAM      | Lorazepam                   |
| 52959033110 | LORAZEPAM      | Lorazepam                   |
| 52959033114 | LORAZEPAM      | Lorazepam                   |
| 52959033115 | LORAZEPAM      | Lorazepam                   |
| 52959033120 | LORAZEPAM      | Lorazepam                   |
| 52959033121 | LORAZEPAM      | Lorazepam                   |
| 52959033130 | LORAZEPAM      | Lorazepam                   |
| 52959033140 | LORAZEPAM      | Lorazepam                   |
| 52959033145 | LORAZEPAM      | Lorazepam                   |
| 52959033160 | LORAZEPAM      | Lorazepam                   |
| 52959033190 | LORAZEPAM      | Lorazepam                   |
| 52959036501 | LORAZEPAM      | Lorazepam                   |
| 52959036505 | LORAZEPAM      | Lorazepam                   |
| 52959036515 | LORAZEPAM      | Lorazepam                   |
| 52959036530 | LORAZEPAM      | Lorazepam                   |
| 52959036560 | LORAZEPAM      | Lorazepam                   |
| 52959036590 | LORAZEPAM      | Lorazepam<br>Flurazepam     |
| 52959036900 | FLURAZEPAM HCL | Hydrochloride<br>Flurazepam |
| 52959036906 | FLURAZEPAM HCL | Hydrochloride<br>Flurazepam |
| 52959036930 | FLURAZEPAM HCL | Hydrochloride               |

|             |                |                                           |
|-------------|----------------|-------------------------------------------|
| 52959036940 | FLURAZEPAM HCL | Flurazepam<br>Hydrochloride<br>Flurazepam |
| 52959036960 | FLURAZEPAM HCL | Hydrochloride                             |
| 52959040130 | TRIAZOLAM      | Triazolam                                 |
| 52959040160 | TRIAZOLAM      | Triazolam                                 |
| 52959040201 | TRIAZOLAM      | Triazolam                                 |
| 52959040210 | TRIAZOLAM      | Triazolam                                 |
| 52959040220 | TRIAZOLAM      | Triazolam                                 |
| 52959040230 | TRIAZOLAM      | Triazolam                                 |
| 52959040250 | TRIAZOLAM      | Triazolam                                 |
| 52959040260 | TRIAZOLAM      | Triazolam                                 |
| 52959045700 | ALPRAZOLAM     | Alprazolam                                |
| 52959045702 | ALPRAZOLAM     | Alprazolam                                |
| 52959045715 | ALPRAZOLAM     | Alprazolam                                |
| 52959045720 | ALPRAZOLAM     | Alprazolam                                |
| 52959045724 | ALPRAZOLAM     | Alprazolam                                |
| 52959045728 | ALPRAZOLAM     | Alprazolam                                |
| 52959045730 | ALPRAZOLAM     | Alprazolam                                |
| 52959045742 | ALPRAZOLAM     | Alprazolam                                |
| 52959045745 | ALPRAZOLAM     | Alprazolam                                |
| 52959045760 | ALPRAZOLAM     | Alprazolam                                |
| 52959045790 | ALPRAZOLAM     | Alprazolam                                |
| 52959045900 | TEMAZEPAM      | Temazepam                                 |
| 52959045910 | TEMAZEPAM      | Temazepam                                 |
| 52959045912 | TEMAZEPAM      | Temazepam                                 |
| 52959045915 | TEMAZEPAM      | Temazepam                                 |
| 52959045920 | TEMAZEPAM      | Temazepam                                 |
| 52959045930 | TEMAZEPAM      | Temazepam                                 |
| 52959045960 | TEMAZEPAM      | Temazepam                                 |
| 52959052400 | ALPRAZOLAM     | Alprazolam                                |
| 52959052402 | ALPRAZOLAM     | Alprazolam                                |
| 52959052406 | ALPRAZOLAM     | Alprazolam                                |
| 52959052410 | ALPRAZOLAM     | Alprazolam                                |
| 52959052414 | ALPRAZOLAM     | Alprazolam                                |
| 52959052428 | ALPRAZOLAM     | Alprazolam                                |
| 52959052430 | ALPRAZOLAM     | Alprazolam                                |
| 52959052460 | ALPRAZOLAM     | Alprazolam                                |
| 52959052490 | ALPRAZOLAM     | Alprazolam                                |
| 52959053510 | TEMAZEPAM      | Temazepam                                 |
| 52959053512 | TEMAZEPAM      | Temazepam                                 |
| 52959053515 | TEMAZEPAM      | Temazepam                                 |
| 52959053524 | TEMAZEPAM      | Temazepam                                 |

|             |                            |                            |
|-------------|----------------------------|----------------------------|
| 52959053528 | TEMAZEPAM                  | Temazepam                  |
| 52959053530 | TEMAZEPAM                  | Temazepam                  |
| 52959053540 | TEMAZEPAM                  | Temazepam                  |
| 52959053560 | TEMAZEPAM                  | Temazepam                  |
| 52959053800 | LORAZEPAM                  | Lorazepam                  |
| 52959053810 | LORAZEPAM                  | Lorazepam                  |
| 52959053820 | LORAZEPAM                  | Lorazepam                  |
| 52959053830 | LORAZEPAM                  | Lorazepam                  |
| 52959053840 | LORAZEPAM                  | Lorazepam                  |
| 52959053860 | LORAZEPAM                  | Lorazepam                  |
| 52959053890 | LORAZEPAM                  | Lorazepam                  |
| 52959083790 | OXAZEPAM                   | Oxazepam                   |
| 52959086400 | ALPRAZOLAM                 | Alprazolam                 |
| 52959086410 | ALPRAZOLAM                 | Alprazolam                 |
| 52959086430 | ALPRAZOLAM                 | Alprazolam                 |
| 52959086440 | ALPRAZOLAM                 | Alprazolam                 |
| 52959086460 | ALPRAZOLAM                 | Alprazolam                 |
| 52959086490 | ALPRAZOLAM                 | Alprazolam                 |
|             | CLORAZEPATE                | Clorazepate                |
| 52959087330 | DIPOTASSIUM<br>CLORAZEPATE | Dipotassium<br>Clorazepate |
| 52959087360 | DIPOTASSIUM<br>CLORAZEPATE | Dipotassium<br>Clorazepate |
| 52959087430 | DIPOTASSIUM<br>CLORAZEPATE | Dipotassium<br>Clorazepate |
| 52959087460 | DIPOTASSIUM                | Dipotassium                |
|             |                            | Chlordiazepoxide           |
| 52959088730 | CHLORDIAZEPOXIDE           | Hydrochloride<br>Midazolam |
| 52959091501 | MIDAZOLAM                  | Hydrochloride              |
| 52959096530 | ALPRAZOLAM                 | Alprazolam                 |
| 52959096560 | ALPRAZOLAM                 | Alprazolam                 |
| 52959097030 | ESTAZOLAM                  | Estazolam                  |
| 53217005607 | QUAZEPAM                   | Quazepam                   |
| 53217005614 | QUAZEPAM                   | Quazepam                   |
| 53217005621 | QUAZEPAM                   | Quazepam                   |
| 53217005630 | QUAZEPAM                   | Quazepam                   |
| 53217005660 | QUAZEPAM                   | Quazepam                   |
| 53217005690 | QUAZEPAM                   | Quazepam                   |
|             | CHLORDIAZEPOXIDE           | Chlordiazepoxide           |
| 53217018320 | HCL                        | Hydrochloride              |
|             | CHLORDIAZEPOXIDE           | Chlordiazepoxide           |
| 53217018330 | HCL                        | Hydrochloride              |
| 53217018400 | DIAZEPAM                   | Diazepam                   |

|             |                  |                  |
|-------------|------------------|------------------|
| 53217018402 | DIAZEPAM         | Diazepam         |
| 53217018405 | DIAZEPAM         | Diazepam         |
| 53217018407 | DIAZEPAM         | Diazepam         |
| 53217018408 | DIAZEPAM         | Diazepam         |
| 53217018410 | DIAZEPAM         | Diazepam         |
| 53217018414 | DIAZEPAM         | Diazepam         |
| 53217018420 | DIAZEPAM         | Diazepam         |
| 53217018429 | DIAZEPAM         | Diazepam         |
| 53217018430 | DIAZEPAM         | Diazepam         |
| 53217018431 | DIAZEPAM         | Diazepam         |
| 53217018460 | DIAZEPAM         | Diazepam         |
| 53217018490 | DIAZEPAM         | Diazepam         |
| 53217018500 | DIAZEPAM         | Diazepam         |
| 53217018502 | DIAZEPAM         | Diazepam         |
| 53217018505 | DIAZEPAM         | Diazepam         |
| 53217018507 | DIAZEPAM         | Diazepam         |
| 53217018508 | DIAZEPAM         | Diazepam         |
| 53217018510 | DIAZEPAM         | Diazepam         |
| 53217018514 | DIAZEPAM         | Diazepam         |
| 53217018520 | DIAZEPAM         | Diazepam         |
| 53217018529 | DIAZEPAM         | Diazepam         |
| 53217018530 | DIAZEPAM         | Diazepam         |
| 53217018531 | DIAZEPAM         | Diazepam         |
| 53217018560 | DIAZEPAM         | Diazepam         |
| 53217018590 | DIAZEPAM         | Diazepam         |
| 53217020030 | LORAZEPAM        | Lorazepam        |
| 53217020060 | LORAZEPAM        | Lorazepam        |
| 53217020090 | LORAZEPAM        | Lorazepam        |
| 53217020530 | TEMAZEPAM        | Temazepam        |
| 53217020802 | LORAZEPAM        | Lorazepam        |
| 53217020805 | LORAZEPAM        | Lorazepam        |
| 53217020830 | LORAZEPAM        | Lorazepam        |
| 53217020845 | LORAZEPAM        | Lorazepam        |
| 53217020860 | LORAZEPAM        | Lorazepam        |
| 53217020890 | LORAZEPAM        | Lorazepam        |
| 53217021600 | LORAZEPAM        | Lorazepam        |
| 53217021615 | LORAZEPAM        | Lorazepam        |
| 53217021630 | LORAZEPAM        | Lorazepam        |
| 53217021640 | LORAZEPAM        | Lorazepam        |
| 53217021660 | LORAZEPAM        | Lorazepam        |
| 53217021690 | LORAZEPAM        | Lorazepam        |
|             | CHLORDIAZEPOXIDE | Chlordiazepoxide |
| 53258060101 | HCL              | Hydrochloride    |

|             |                            |                                   |
|-------------|----------------------------|-----------------------------------|
| 53258060113 | CHLORDIAZEPOXIDE<br>HCL    | Chlordiazepoxide<br>Hydrochloride |
| 53258060201 | CHLORDIAZEPOXIDE<br>HCL    | Chlordiazepoxide<br>Hydrochloride |
| 53258060210 | CHLORDIAZEPOXIDE<br>HCL    | Chlordiazepoxide<br>Hydrochloride |
| 53258060213 | CHLORDIAZEPOXIDE<br>HCL    | Chlordiazepoxide<br>Hydrochloride |
| 53258060301 | CHLORDIAZEPOXIDE<br>HCL    | Chlordiazepoxide<br>Hydrochloride |
| 53258060313 | CHLORDIAZEPOXIDE<br>HCL    | Chlordiazepoxide<br>Hydrochloride |
| 53258060401 | DIAZEPAM                   | Diazepam                          |
| 53258060413 | DIAZEPAM                   | Diazepam                          |
| 53258060501 | DIAZEPAM                   | Diazepam                          |
| 53258060513 | DIAZEPAM                   | Diazepam                          |
| 53258060601 | DIAZEPAM                   | Diazepam                          |
| 53258060613 | DIAZEPAM                   | Diazepam                          |
| 53258061201 | FLURAZEPAM HCL             | Flurazepam<br>Hydrochloride       |
| 53258061213 | FLURAZEPAM HCL             | Flurazepam<br>Hydrochloride       |
| 53258061301 | FLURAZEPAM HCL             | Flurazepam<br>Hydrochloride       |
| 53258061313 | FLURAZEPAM HCL             | Flurazepam<br>Hydrochloride       |
| 53258061501 | TEMAZEPAM                  | Temazepam                         |
| 53258061513 | TEMAZEPAM                  | Temazepam                         |
| 53258061601 | TEMAZEPAM                  | Temazepam                         |
| 53258061613 | TEMAZEPAM                  | Temazepam                         |
| 53258274001 | DIAZEPAM                   | Diazepam                          |
| 53258274003 | DIAZEPAM                   | Diazepam                          |
| 53261045899 | RO-POXIDE                  | Chlordiazepoxide<br>Hydrochloride |
| 53261067530 | RO-AZEPAM                  | Diazepam                          |
| 53265004810 | CLORAZEPATE<br>DIPOTASSIUM | Clorazepate<br>Dipotassium        |
| 53265004850 | CLORAZEPATE<br>DIPOTASSIUM | Clorazepate<br>Dipotassium        |
| 53265004910 | CLORAZEPATE<br>DIPOTASSIUM | Clorazepate<br>Dipotassium        |
| 53265004950 | CLORAZEPATE<br>DIPOTASSIUM | Clorazepate<br>Dipotassium        |
| 53265005010 | CLORAZEPATE<br>DIPOTASSIUM | Clorazepate<br>Dipotassium        |
| 53265005050 | CLORAZEPATE                | Clorazepate                       |

|             |                  |                             |
|-------------|------------------|-----------------------------|
|             | DIPOTASSIUM      | Dipotassium                 |
| 53445182205 | TEMAZEPAM        | Temazepam                   |
| 53445182305 | TEMAZEPAM        | Temazepam                   |
|             | CHLORDIAZEPOXIDE | Chlordiazepoxide            |
| 53489019501 | HCL              | Hydrochloride               |
|             | CHLORDIAZEPOXIDE | Chlordiazepoxide            |
| 53489019505 | HCL              | Hydrochloride               |
|             | CHLORDIAZEPOXIDE | Chlordiazepoxide            |
| 53489019601 | HCL              | Hydrochloride               |
|             | CHLORDIAZEPOXIDE | Chlordiazepoxide            |
| 53489019605 | HCL              | Hydrochloride               |
|             | CHLORDIAZEPOXIDE | Chlordiazepoxide            |
| 53489019610 | HCL              | Hydrochloride               |
|             | CHLORDIAZEPOXIDE | Chlordiazepoxide            |
| 53489019701 | HCL              | Hydrochloride               |
|             | CHLORDIAZEPOXIDE | Chlordiazepoxide            |
| 53489019705 | HCL              | Hydrochloride               |
| 53489024301 | DIAZEPAM         | Diazepam                    |
| 53489024401 | DIAZEPAM         | Diazepam                    |
| 53489024501 | DIAZEPAM         | Diazepam                    |
|             |                  | Flurazepam                  |
| 53489029401 | FLURAZEPAM HCL   | Hydrochloride<br>Flurazepam |
|             |                  | Hydrochloride               |
| 53489029501 | FLURAZEPAM HCL   | Hydrochloride               |
| 53489035701 | LORAZEPAM        | Lorazepam                   |
| 53489035705 | LORAZEPAM        | Lorazepam                   |
| 53489035710 | LORAZEPAM        | Lorazepam                   |
| 53489035801 | LORAZEPAM        | Lorazepam                   |
| 53489035805 | LORAZEPAM        | Lorazepam                   |
| 53489035810 | LORAZEPAM        | Lorazepam                   |
| 53489035901 | LORAZEPAM        | Lorazepam                   |
| 53489035905 | LORAZEPAM        | Lorazepam                   |
| 53489035910 | LORAZEPAM        | Lorazepam                   |
| 53489040701 | OXAZEPAM         | Oxazepam                    |
| 53489048001 | TEMAZEPAM        | Temazepam                   |
| 53489048101 | TEMAZEPAM        | Temazepam                   |
| 53489064801 | TEMAZEPAM        | Temazepam                   |
| 53489065007 | TEMAZEPAM        | Temazepam                   |
|             | CLORAZEPATE      | Clorazepate                 |
| 53506080130 | DIPOTASSIUM      | Dipotassium                 |
|             | CLORAZEPATE      | Clorazepate                 |
| 53506080230 | DIPOTASSIUM      | Dipotassium                 |
| 53506082730 | DIAZEPAM         | Diazepam                    |
| 53506082830 | DIAZEPAM         | Diazepam                    |
| 53506082930 | DIAZEPAM         | Diazepam                    |

|             |                            |                                                 |
|-------------|----------------------------|-------------------------------------------------|
| 53506083630 | CHLORDIAZEPOXIDE<br>HCL    | Chlordiazepoxide<br>Hydrochloride<br>Flurazepam |
| 53506083712 | FLURAZEPAM HCL             | Hydrochloride<br>Flurazepam                     |
| 53506083730 | FLURAZEPAM HCL             | Hydrochloride<br>Flurazepam                     |
| 53506083830 | FLURAZEPAM HCL             | Hydrochloride                                   |
| 53506084030 | TEMAZEPAM                  | Temazepam                                       |
| 53506084130 | TEMAZEPAM                  | Temazepam                                       |
| 53506085230 | LORAZEPAM                  | Lorazepam                                       |
| 53506085330 | LORAZEPAM                  | Lorazepam                                       |
| 53506085430 | LORAZEPAM                  | Lorazepam                                       |
| 53978501705 | TEMAZEPAM                  | Temazepam                                       |
| 53978601605 | TEMAZEPAM                  | Temazepam                                       |
| 54274014910 | CLORAZEPATE<br>DIPOTASSIUM | Clorazepate<br>Dipotassium                      |
| 54274014930 | CLORAZEPATE<br>DIPOTASSIUM | Clorazepate<br>Dipotassium                      |
| 54274015010 | CLORAZEPATE<br>DIPOTASSIUM | Clorazepate<br>Dipotassium                      |
| 54274015030 | CLORAZEPATE<br>DIPOTASSIUM | Clorazepate<br>Dipotassium                      |
| 54274015110 | DIPOTASSIUM                | Dipotassium                                     |
| 54274025010 | TEMAZEPAM                  | Temazepam                                       |
| 54274025030 | TEMAZEPAM                  | Temazepam                                       |
| 54274025110 | TEMAZEPAM                  | Temazepam                                       |
| 54274025130 | TEMAZEPAM                  | Temazepam                                       |
| 54274025310 | LORAZEPAM                  | Lorazepam                                       |
| 54274025350 | LORAZEPAM                  | Lorazepam                                       |
| 54274025410 | LORAZEPAM                  | Lorazepam                                       |
| 54274025430 | LORAZEPAM                  | Lorazepam                                       |
| 54274025450 | LORAZEPAM                  | Lorazepam                                       |
| 54274026110 | DIAZEPAM                   | Diazepam                                        |
| 54274026150 | DIAZEPAM                   | Diazepam                                        |
| 54274026210 | DIAZEPAM                   | Diazepam                                        |
| 54274026250 | DIAZEPAM                   | Diazepam                                        |
| 54274031310 | OXAZEPAM                   | Oxazepam                                        |
| 54274031410 | OXAZEPAM                   | Oxazepam                                        |
| 54274031430 | OXAZEPAM                   | Oxazepam                                        |
| 54274031510 | OXAZEPAM                   | Oxazepam                                        |
| 54274031530 | OXAZEPAM                   | Oxazepam                                        |
| 54274033610 | DIAZEPAM                   | Diazepam                                        |
| 54274033650 | DIAZEPAM                   | Diazepam                                        |

|             |                  |                  |
|-------------|------------------|------------------|
| 54274033710 | DIAZEPAM         | Diazepam         |
| 54274033750 | DIAZEPAM         | Diazepam         |
| 54274033810 | DIAZEPAM         | Diazepam         |
| 54274033850 | DIAZEPAM         | Diazepam         |
|             | CHLORDIAZEPOXIDE | Chlordiazepoxide |
| 54274034410 | HCL              | Hydrochloride    |
|             | CHLORDIAZEPOXIDE | Chlordiazepoxide |
| 54274034450 | HCL              | Hydrochloride    |
|             | CHLORDIAZEPOXIDE | Chlordiazepoxide |
| 54274034510 | HCL              | Hydrochloride    |
|             | CHLORDIAZEPOXIDE | Chlordiazepoxide |
| 54274034550 | HCL              | Hydrochloride    |
|             | CHLORDIAZEPOXIDE | Chlordiazepoxide |
| 54274034610 | HCL              | Hydrochloride    |
|             | CHLORDIAZEPOXIDE | Chlordiazepoxide |
| 54274034630 | HCL              | Hydrochloride    |
|             |                  | Flurazepam       |
| 54274040610 | FLURAZEPAM HCL   | Hydrochloride    |
|             |                  | Flurazepam       |
| 54274040630 | FLURAZEPAM HCL   | Hydrochloride    |
|             |                  | Flurazepam       |
| 54274040710 | FLURAZEPAM HCL   | Hydrochloride    |
|             |                  | Flurazepam       |
| 54274040730 | FLURAZEPAM HCL   | Hydrochloride    |
| 54274047110 | LORAZEPAM        | Lorazepam        |
| 54274047130 | LORAZEPAM        | Lorazepam        |
| 54274052062 | DIAZEPAM         | Diazepam         |
| 54274057110 | DIAZEPAM         | Diazepam         |
| 54274057150 | DIAZEPAM         | Diazepam         |
| 54274057210 | DIAZEPAM         | Diazepam         |
| 54274057250 | DIAZEPAM         | Diazepam         |
| 54274057310 | DIAZEPAM         | Diazepam         |
| 54274057350 | DIAZEPAM         | Diazepam         |
|             | CLORAZEPATE      | Clorazepate      |
| 54274064610 | DIPOTASSIUM      | Dipotassium      |
|             | CLORAZEPATE      | Clorazepate      |
| 54274064630 | DIPOTASSIUM      | Dipotassium      |
|             | CLORAZEPATE      | Clorazepate      |
| 54274064710 | DIPOTASSIUM      | Dipotassium      |
|             | CLORAZEPATE      | Clorazepate      |
| 54274064730 | DIPOTASSIUM      | Dipotassium      |
|             | CLORAZEPATE      | Clorazepate      |
| 54274064810 | DIPOTASSIUM      | Dipotassium      |
| 54274085410 | TEMAZEPAM        | Temazepam        |
| 54274085430 | TEMAZEPAM        | Temazepam        |
| 54274085510 | TEMAZEPAM        | Temazepam        |

|             |                  |                  |
|-------------|------------------|------------------|
| 54274085530 | TEMAZEPAM        | Temazepam        |
|             | CHLORDIAZEPOXIDE | Chlordiazepoxide |
| 54569062401 | HCL              | Hydrochloride    |
|             | CHLORDIAZEPOXIDE | Chlordiazepoxide |
| 54569062402 | HCL              | Hydrochloride    |
|             | CHLORDIAZEPOXIDE | Chlordiazepoxide |
| 54569062403 | HCL              | Hydrochloride    |
|             |                  | Flurazepam       |
| 54569089500 | DALMANE          | Hydrochloride    |
|             |                  | Flurazepam       |
| 54569089600 | DALMANE          | Hydrochloride    |
|             |                  | Flurazepam       |
| 54569089800 | FLURAZEPAM HCL   | Hydrochloride    |
|             |                  | Flurazepam       |
| 54569089801 | FLURAZEPAM HCL   | Hydrochloride    |
|             |                  | Flurazepam       |
| 54569089802 | FLURAZEPAM HCL   | Hydrochloride    |
|             |                  | Flurazepam       |
| 54569089803 | FLURAZEPAM HCL   | Hydrochloride    |
|             |                  | Flurazepam       |
| 54569089804 | FLURAZEPAM HCL   | Hydrochloride    |
|             |                  | Flurazepam       |
| 54569089805 | FLURAZEPAM HCL   | Hydrochloride    |
| 54569089902 | HALCION          | Triazolam        |
| 54569089905 | HALCION          | Triazolam        |
| 54569089907 | HALCION          | Triazolam        |
| 54569090300 | RESTORIL         | Temazepam        |
| 54569090400 | RESTORIL         | Temazepam        |
| 54569090500 | TEMAZEPAM        | Temazepam        |
| 54569090501 | TEMAZEPAM        | Temazepam        |
| 54569090502 | TEMAZEPAM        | Temazepam        |
| 54569090503 | TEMAZEPAM        | Temazepam        |
| 54569090504 | TEMAZEPAM        | Temazepam        |
| 54569090505 | TEMAZEPAM        | Temazepam        |
| 54569090506 | TEMAZEPAM        | Temazepam        |
| 54569090507 | TEMAZEPAM        | Temazepam        |
| 54569090508 | TEMAZEPAM        | Temazepam        |
| 54569092701 | ATIVAN           | Lorazepam        |
|             |                  | Chlordiazepoxide |
| 54569093200 | LIBRIUM          | Hydrochloride    |
|             | CHLORDIAZEPOXIDE | Chlordiazepoxide |
| 54569093300 | HCL              | Hydrochloride    |
|             | CHLORDIAZEPOXIDE | Chlordiazepoxide |
| 54569093301 | HCL              | Hydrochloride    |
|             | CHLORDIAZEPOXIDE | Chlordiazepoxide |
| 54569093302 | HCL              | Hydrochloride    |

|             |             |             |
|-------------|-------------|-------------|
| 54569093600 | DIAZEPAM    | Diazepam    |
| 54569093601 | DIAZEPAM    | Diazepam    |
| 54569093602 | DIAZEPAM    | Diazepam    |
| 54569093603 | DIAZEPAM    | Diazepam    |
| 54569093604 | DIAZEPAM    | Diazepam    |
| 54569093605 | DIAZEPAM    | Diazepam    |
| 54569093606 | DIAZEPAM    | Diazepam    |
| 54569093607 | DIAZEPAM    | Diazepam    |
| 54569093608 | DIAZEPAM    | Diazepam    |
| 54569093609 | DIAZEPAM    | Diazepam    |
| 54569094600 | VALIUM      | Diazepam    |
| 54569094700 | DIAZEPAM    | Diazepam    |
| 54569094701 | DIAZEPAM    | Diazepam    |
| 54569094702 | DIAZEPAM    | Diazepam    |
| 54569094703 | DIAZEPAM    | Diazepam    |
| 54569094704 | DIAZEPAM    | Diazepam    |
| 54569094705 | DIAZEPAM    | Diazepam    |
| 54569094706 | DIAZEPAM    | Diazepam    |
| 54569094800 | VALIUM      | Diazepam    |
| 54569094801 | VALIUM      | Diazepam    |
| 54569094803 | VALIUM      | Diazepam    |
| 54569094804 | VALIUM      | Diazepam    |
| 54569094900 | DIAZEPAM    | Diazepam    |
| 54569094901 | DIAZEPAM    | Diazepam    |
| 54569094902 | DIAZEPAM    | Diazepam    |
| 54569094903 | DIAZEPAM    | Diazepam    |
| 54569094904 | DIAZEPAM    | Diazepam    |
| 54569094905 | DIAZEPAM    | Diazepam    |
| 54569094906 | DIAZEPAM    | Diazepam    |
| 54569094907 | DIAZEPAM    | Diazepam    |
| 54569094908 | DIAZEPAM    | Diazepam    |
| 54569094909 | DIAZEPAM    | Diazepam    |
| 54569095000 | VALIUM      | Diazepam    |
|             | CLORAZEPATE | Clorazepate |
| 54569095100 | DIPOTASSIUM | Dipotassium |
|             | CLORAZEPATE | Clorazepate |
| 54569095101 | DIPOTASSIUM | Dipotassium |
|             | CLORAZEPATE | Clorazepate |
| 54569095102 | DIPOTASSIUM | Dipotassium |
|             | CLORAZEPATE | Clorazepate |
| 54569095103 | DIPOTASSIUM | Dipotassium |
|             | CLORAZEPATE | Clorazepate |
| 54569095104 | DIPOTASSIUM | Dipotassium |
| 54569095200 | CLORAZEPATE | Clorazepate |

|             |             |                         |
|-------------|-------------|-------------------------|
|             | DIPOTASSIUM | Dipotassium             |
|             | CLORAZEPATE | Clorazepate             |
| 54569095201 | DIPOTASSIUM | Dipotassium             |
|             | CLORAZEPATE | Clorazepate             |
| 54569095202 | DIPOTASSIUM | Dipotassium             |
|             | CLORAZEPATE | Clorazepate             |
| 54569095203 | DIPOTASSIUM | Dipotassium             |
|             | CLORAZEPATE | Clorazepate             |
| 54569095204 | DIPOTASSIUM | Dipotassium             |
| 54569095300 | XANAX       | Alprazolam              |
| 54569095303 | XANAX       | Alprazolam              |
| 54569095305 | XANAX       | Alprazolam              |
| 54569095306 | XANAX       | Alprazolam              |
| 54569095307 | XANAX       | Alprazolam              |
| 54569095400 | XANAX       | Alprazolam              |
| 54569095402 | XANAX       | Alprazolam              |
| 54569095403 | XANAX       | Alprazolam              |
| 54569095404 | XANAX       | Alprazolam              |
| 54569095406 | XANAX       | Alprazolam              |
| 54569095407 | XANAX       | Alprazolam              |
| 54569141000 | VALIUM      | Diazepam                |
| 54569141300 | DIAZEPAM    | Diazepam<br>Midazolam   |
| 54569151200 | VERSED      | Hydrochloride           |
| 54569158500 | LORAZEPAM   | Lorazepam               |
| 54569158501 | LORAZEPAM   | Lorazepam               |
| 54569158502 | LORAZEPAM   | Lorazepam               |
| 54569158503 | LORAZEPAM   | Lorazepam               |
| 54569158504 | LORAZEPAM   | Lorazepam               |
| 54569158505 | LORAZEPAM   | Lorazepam               |
| 54569158506 | LORAZEPAM   | Lorazepam               |
| 54569158507 | LORAZEPAM   | Lorazepam               |
| 54569158508 | LORAZEPAM   | Lorazepam               |
| 54569158509 | LORAZEPAM   | Lorazepam               |
| 54569172600 | TEMAZEPAM   | Temazepam               |
| 54569172601 | TEMAZEPAM   | Temazepam               |
| 54569172602 | TEMAZEPAM   | Temazepam               |
| 54569172603 | TEMAZEPAM   | Temazepam               |
| 54569172604 | TEMAZEPAM   | Temazepam               |
| 54569176900 | XANAX       | Alprazolam              |
| 54569176901 | XANAX       | Alprazolam              |
| 54569176902 | XANAX       | Alprazolam<br>Midazolam |
| 54569204400 | VERSED      | Hydrochloride           |

|             |                  |                  |
|-------------|------------------|------------------|
| 54569204401 | VERSED           | Midazolam        |
|             | CHLORDIAZEPOXIDE | Hydrochloride    |
|             | CHLORDIAZEPOXIDE | Chlordiazepoxide |
| 54569209500 | HCL              | Hydrochloride    |
|             | CHLORDIAZEPOXIDE | Chlordiazepoxide |
| 54569209501 | HCL              | Hydrochloride    |
|             | CHLORDIAZEPOXIDE | Chlordiazepoxide |
| 54569209502 | HCL              | Hydrochloride    |
|             | CHLORDIAZEPOXIDE | Chlordiazepoxide |
| 54569209503 | HCL              | Hydrochloride    |
|             | CHLORDIAZEPOXIDE | Chlordiazepoxide |
| 54569209504 | HCL              | Hydrochloride    |
|             | CHLORDIAZEPOXIDE | Chlordiazepoxide |
| 54569209505 | HCL              | Hydrochloride    |
|             | CHLORDIAZEPOXIDE | Chlordiazepoxide |
| 54569209506 | HCL              | Hydrochloride    |
| 54569217300 | LORAZEPAM        | Lorazepam        |
| 54569217301 | LORAZEPAM        | Lorazepam        |
| 54569217302 | LORAZEPAM        | Lorazepam        |
| 54569217304 | LORAZEPAM        | Lorazepam        |
| 54569222400 | VALIUM           | Diazepam         |
|             |                  | Midazolam        |
| 54569226600 | VERSED           | Hydrochloride    |
|             |                  | Flurazepam       |
| 54569237600 | FLURAZEPAM HCL   | Hydrochloride    |
|             |                  | Flurazepam       |
| 54569237601 | FLURAZEPAM HCL   | Hydrochloride    |
|             |                  | Flurazepam       |
| 54569237602 | FLURAZEPAM HCL   | Hydrochloride    |
|             |                  | Flurazepam       |
| 54569237603 | FLURAZEPAM HCL   | Hydrochloride    |
|             |                  | Flurazepam       |
| 54569237604 | FLURAZEPAM HCL   | Hydrochloride    |
|             |                  | Flurazepam       |
| 54569237605 | FLURAZEPAM HCL   | Hydrochloride    |
|             |                  | Flurazepam       |
| 54569237606 | FLURAZEPAM HCL   | Hydrochloride    |
| 54569253200 | ATIVAN           | Lorazepam        |
| 54569268700 | LORAZEPAM        | Lorazepam        |
| 54569268701 | LORAZEPAM        | Lorazepam        |
| 54569268702 | LORAZEPAM        | Lorazepam        |
| 54569268703 | LORAZEPAM        | Lorazepam        |
| 54569268704 | LORAZEPAM        | Lorazepam        |
| 54569270500 | VALIUM           | Diazepam         |
| 54569277500 | DIAZEPAM         | Diazepam         |
| 54569298100 | OXAZEPAM         | Oxazepam         |

|             |                       |                              |
|-------------|-----------------------|------------------------------|
| 54569298101 | OXAZEPAM              | Oxazepam                     |
| 54569298105 | OXAZEPAM              | Oxazepam                     |
| 54569314500 | LORAZEPAM             | Lorazepam<br>Midazolam       |
| 54569315500 | VERSED                | Hydrochloride                |
| 54569336300 | OXAZEPAM              | Oxazepam                     |
| 54569336301 | OXAZEPAM              | Oxazepam                     |
| 54569336302 | OXAZEPAM              | Oxazepam                     |
| 54569336303 | OXAZEPAM              | Oxazepam<br>Midazolam        |
| 54569362600 | VERSED                | Hydrochloride<br>Midazolam   |
| 54569362601 | VERSED                | Hydrochloride                |
| 54569375500 | ALPRAZOLAM            | Alprazolam                   |
| 54569375501 | ALPRAZOLAM            | Alprazolam                   |
| 54569375502 | ALPRAZOLAM            | Alprazolam                   |
| 54569375503 | ALPRAZOLAM            | Alprazolam                   |
| 54569375504 | ALPRAZOLAM            | Alprazolam                   |
| 54569375505 | ALPRAZOLAM            | Alprazolam                   |
| 54569375600 | ALPRAZOLAM            | Alprazolam                   |
| 54569375601 | ALPRAZOLAM            | Alprazolam                   |
| 54569375602 | ALPRAZOLAM            | Alprazolam                   |
| 54569375603 | ALPRAZOLAM            | Alprazolam                   |
| 54569375604 | ALPRAZOLAM            | Alprazolam                   |
| 54569396600 | TRIAZOLAM             | Triazolam                    |
| 54569396601 | TRIAZOLAM             | Triazolam                    |
| 54569396603 | TRIAZOLAM             | Triazolam                    |
| 54569414900 | DORAL                 | Quazepam                     |
| 54569416700 | DIAZEPAM              | Diazepam<br>Midazolam        |
| 54569425700 | VERSED<br>CLORAZEPATE | Hydrochloride<br>Clorazepate |
| 54569458601 | DIPOTASSIUM           | Dipotassium                  |
| 54569461900 | ALPRAZOLAM            | Alprazolam                   |
| 54569461901 | ALPRAZOLAM            | Alprazolam                   |
| 54569461902 | ALPRAZOLAM            | Alprazolam                   |
| 54569461903 | ALPRAZOLAM            | Alprazolam                   |
| 54569461906 | ALPRAZOLAM            | Alprazolam                   |
| 54569476400 | DIAZEPAM              | Diazepam                     |
| 54569476403 | DIAZEPAM              | Diazepam                     |
| 54569476404 | DIAZEPAM              | Diazepam                     |
| 54569490000 | ALPRAZOLAM            | Alprazolam                   |
| 54569490001 | ALPRAZOLAM            | Alprazolam                   |
| 54569490002 | ALPRAZOLAM            | Alprazolam                   |

|             |               |                            |
|-------------|---------------|----------------------------|
| 54569511600 | MIDAZOLAM HCL | Midazolam<br>Hydrochloride |
| 54569511601 | MIDAZOLAM HCL | Midazolam<br>Hydrochloride |
| 54569525500 | MIDAZOLAM HCL | Midazolam<br>Hydrochloride |
| 54569525501 | MIDAZOLAM HCL | Midazolam<br>Hydrochloride |
| 54569535000 | VERSED        | Hydrochloride              |
| 54569535100 | DIAZEPAM      | Diazepam                   |
| 54569535403 | DIAZEPAM      | Diazepam                   |
| 54569535404 | DIAZEPAM      | Diazepam                   |
| 54569540100 | LORAZEPAM     | Lorazepam                  |
| 54569540102 | LORAZEPAM     | Lorazepam                  |
| 54569540104 | LORAZEPAM     | Lorazepam<br>Midazolam     |
| 54569546800 | MIDAZOLAM HCL | Hydrochloride              |
| 54569578600 | NIRAVAM       | Alprazolam                 |
| 54569578700 | NIRAVAM       | Alprazolam                 |
| 54569604400 | DIAZEPAM      | Diazepam                   |
| 54569618700 | ALPRAZOLAM    | Alprazolam                 |
| 54569637600 | TRIAZOLAM     | Triazolam                  |
| 54569656800 | QUAZEPAM      | Quazepam                   |
| 54569664000 | DIAZEPAM      | Diazepam                   |
| 54569704600 | DIAZEPAM      | Diazepam                   |
| 54868003800 | TEMAZEPAM     | Temazepam                  |
| 54868003801 | TEMAZEPAM     | Temazepam                  |
| 54868003802 | TEMAZEPAM     | Temazepam                  |
| 54868003803 | TEMAZEPAM     | Temazepam                  |
| 54868003804 | TEMAZEPAM     | Temazepam                  |
| 54868003805 | TEMAZEPAM     | Temazepam                  |
| 54868003806 | TEMAZEPAM     | Temazepam                  |
| 54868003902 | TEMAZEPAM     | Temazepam                  |
| 54868003903 | TEMAZEPAM     | Temazepam                  |
| 54868003904 | TEMAZEPAM     | Temazepam                  |
| 54868003905 | TEMAZEPAM     | Temazepam                  |
| 54868003906 | TEMAZEPAM     | Temazepam                  |
| 54868005900 | DIAZEPAM      | Diazepam                   |
| 54868005901 | DIAZEPAM      | Diazepam                   |
| 54868005902 | DIAZEPAM      | Diazepam                   |
| 54868005903 | DIAZEPAM      | Diazepam                   |
| 54868005904 | DIAZEPAM      | Diazepam                   |
| 54868005905 | DIAZEPAM      | Diazepam                   |

|             |                  |                  |
|-------------|------------------|------------------|
| 54868005906 | DIAZEPAM         | Diazepam         |
| 54868005908 | DIAZEPAM         | Diazepam         |
| 54868005909 | DIAZEPAM         | Diazepam         |
| 54868006102 | LORAZEPAM        | Lorazepam        |
| 54868006103 | LORAZEPAM        | Lorazepam        |
| 54868006104 | LORAZEPAM        | Lorazepam        |
| 54868006105 | LORAZEPAM        | Lorazepam        |
| 54868006106 | LORAZEPAM        | Lorazepam        |
|             | CHLORDIAZEPOXIDE | Chlordiazepoxide |
| 54868007000 | HCL              | Hydrochloride    |
|             | CHLORDIAZEPOXIDE | Chlordiazepoxide |
| 54868007002 | HCL              | Hydrochloride    |
|             |                  | Flurazepam       |
| 54868009201 | FLURAZEPAM HCL   | Hydrochloride    |
|             |                  | Flurazepam       |
| 54868009202 | FLURAZEPAM HCL   | Hydrochloride    |
|             |                  | Flurazepam       |
| 54868009203 | FLURAZEPAM HCL   | Hydrochloride    |
|             |                  | Flurazepam       |
| 54868009300 | FLURAZEPAM HCL   | Hydrochloride    |
|             |                  | Flurazepam       |
| 54868009301 | FLURAZEPAM HCL   | Hydrochloride    |
|             |                  | Midazolam        |
| 54868011001 | VERSED           | Hydrochloride    |
|             |                  | Midazolam        |
| 54868011002 | VERSED           | Hydrochloride    |
| 54868052201 | XANAX            | Alprazolam       |
| 54868052202 | XANAX            | Alprazolam       |
| 54868052203 | XANAX            | Alprazolam       |
| 54868052204 | XANAX            | Alprazolam       |
| 54868052205 | XANAX            | Alprazolam       |
| 54868052206 | XANAX            | Alprazolam       |
| 54868052207 | XANAX            | Alprazolam       |
| 54868052208 | XANAX            | Alprazolam       |
| 54868061700 | DIAZEPAM         | Diazepam         |
| 54868061701 | DIAZEPAM         | Diazepam         |
| 54868061702 | DIAZEPAM         | Diazepam         |
|             |                  | Flurazepam       |
| 54868067501 | DALMANE          | Hydrochloride    |
| 54868070300 | VALIUM           | Diazepam         |
| 54868070301 | VALIUM           | Diazepam         |
| 54868070302 | VALIUM           | Diazepam         |
| 54868070303 | VALIUM           | Diazepam         |
| 54868071600 | VALIUM           | Diazepam         |
| 54868077800 | RESTORIL         | Temazepam        |

|             |             |             |
|-------------|-------------|-------------|
| 54868077801 | RESTORIL    | Temazepam   |
| 54868077802 | RESTORIL    | Temazepam   |
| 54868077803 | RESTORIL    | Temazepam   |
| 54868077900 | RESTORIL    | Temazepam   |
| 54868077901 | RESTORIL    | Temazepam   |
|             | CLORAZEPATE | Clorazepate |
| 54868080200 | DIPOTASSIUM | Dipotassium |
|             | CLORAZEPATE | Clorazepate |
| 54868080201 | DIPOTASSIUM | Dipotassium |
|             | CLORAZEPATE | Clorazepate |
| 54868080202 | DIPOTASSIUM | Dipotassium |
|             | CLORAZEPATE | Clorazepate |
| 54868080203 | DIPOTASSIUM | Dipotassium |
| 54868082801 | HALCION     | Triazolam   |
| 54868082802 | HALCION     | Triazolam   |
| 54868082901 | HALCION     | Triazolam   |
| 54868082902 | HALCION     | Triazolam   |
| 54868082903 | HALCION     | Triazolam   |
| 54868082904 | HALCION     | Triazolam   |
| 54868098700 | VALIUM      | Diazepam    |
| 54868098701 | VALIUM      | Diazepam    |
| 54868098800 | DIAZEPAM    | Diazepam    |
| 54868098801 | DIAZEPAM    | Diazepam    |
| 54868098802 | DIAZEPAM    | Diazepam    |
| 54868098803 | DIAZEPAM    | Diazepam    |
| 54868098804 | DIAZEPAM    | Diazepam    |
| 54868098805 | DIAZEPAM    | Diazepam    |
| 54868098806 | DIAZEPAM    | Diazepam    |
| 54868098807 | DIAZEPAM    | Diazepam    |
| 54868098808 | DIAZEPAM    | Diazepam    |
| 54868098809 | DIAZEPAM    | Diazepam    |
| 54868099200 | XANAX       | Alprazolam  |
| 54868099201 | XANAX       | Alprazolam  |
| 54868099202 | XANAX       | Alprazolam  |
| 54868099203 | XANAX       | Alprazolam  |
| 54868099204 | XANAX       | Alprazolam  |
| 54868125100 | XANAX       | Alprazolam  |
| 54868125101 | XANAX       | Alprazolam  |
| 54868125102 | XANAX       | Alprazolam  |
| 54868133800 | LORAZEPAM   | Lorazepam   |
| 54868133801 | LORAZEPAM   | Lorazepam   |
| 54868133802 | LORAZEPAM   | Lorazepam   |
| 54868133803 | LORAZEPAM   | Lorazepam   |
| 54868133804 | LORAZEPAM   | Lorazepam   |

|             |                            |                            |
|-------------|----------------------------|----------------------------|
| 54868133806 | LORAZEPAM                  | Lorazepam                  |
| 54868133807 | LORAZEPAM                  | Lorazepam                  |
| 54868133808 | LORAZEPAM                  | Lorazepam                  |
| 54868133809 | LORAZEPAM                  | Lorazepam                  |
| 54868133900 | ATIVAN                     | Lorazepam                  |
| 54868133901 | ATIVAN                     | Lorazepam                  |
| 54868133902 | ATIVAN                     | Lorazepam                  |
| 54868133904 | ATIVAN                     | Lorazepam                  |
| 54868133905 | ATIVAN                     | Lorazepam                  |
| 54868134100 | OXAZEPAM                   | Oxazepam                   |
| 54868134101 | OXAZEPAM                   | Oxazepam                   |
| 54868134102 | OXAZEPAM                   | Oxazepam                   |
| 54868212601 | DIAZEPAM                   | Diazepam                   |
| 54868212602 | DIAZEPAM                   | Diazepam                   |
| 54868212603 | DIAZEPAM                   | Diazepam                   |
| 54868212604 | DIAZEPAM                   | Diazepam                   |
| 54868212605 | DIAZEPAM                   | Diazepam                   |
| 54868212606 | DIAZEPAM                   | Diazepam                   |
| 54868212607 | DIAZEPAM                   | Diazepam                   |
|             | CLORAZEPATE                | Clorazepate                |
| 54868213300 | DIPOTASSIUM<br>CLORAZEPATE | Dipotassium<br>Clorazepate |
| 54868213301 | DIPOTASSIUM<br>CLORAZEPATE | Dipotassium<br>Clorazepate |
| 54868213302 | DIPOTASSIUM<br>CLORAZEPATE | Dipotassium<br>Clorazepate |
| 54868213303 | DIPOTASSIUM<br>CLORAZEPATE | Dipotassium<br>Clorazepate |
| 54868213304 | DIPOTASSIUM                | Dipotassium                |
| 54868214400 | ATIVAN                     | Lorazepam                  |
| 54868214500 | LORAZEPAM                  | Lorazepam                  |
| 54868214502 | LORAZEPAM                  | Lorazepam                  |
| 54868214503 | LORAZEPAM                  | Lorazepam                  |
| 54868214504 | LORAZEPAM                  | Lorazepam                  |
| 54868214505 | LORAZEPAM                  | Lorazepam                  |
| 54868214506 | LORAZEPAM                  | Lorazepam                  |
| 54868214507 | LORAZEPAM                  | Lorazepam                  |
| 54868214508 | LORAZEPAM                  | Lorazepam                  |
| 54868214509 | LORAZEPAM                  | Lorazepam                  |
| 54868218200 | OXAZEPAM                   | Oxazepam                   |
| 54868218201 | OXAZEPAM                   | Oxazepam                   |
| 54868218202 | OXAZEPAM                   | Oxazepam                   |
| 54868232000 | DIAZEPAM                   | Diazepam                   |
| 54868232001 | DIAZEPAM                   | Diazepam                   |

|             |                  |                  |
|-------------|------------------|------------------|
| 54868232002 | DIAZEPAM         | Diazepam         |
|             | CHLORDIAZEPOXIDE | Chlordiazepoxide |
| 54868236100 | HCL              | Hydrochloride    |
|             | CHLORDIAZEPOXIDE | Chlordiazepoxide |
| 54868236102 | HCL              | Hydrochloride    |
|             | CHLORDIAZEPOXIDE | Chlordiazepoxide |
| 54868236103 | HCL              | Hydrochloride    |
|             | CHLORDIAZEPOXIDE | Chlordiazepoxide |
| 54868236104 | HCL              | Hydrochloride    |
|             | CHLORDIAZEPOXIDE | Chlordiazepoxide |
| 54868236201 | LIBRIUM          | Hydrochloride    |
| 54868240701 | ATIVAN           | Lorazepam        |
|             | CHLORDIAZEPOXIDE | Chlordiazepoxide |
| 54868246300 | HCL              | Hydrochloride    |
|             | CHLORDIAZEPOXIDE | Chlordiazepoxide |
| 54868246301 | HCL              | Hydrochloride    |
|             | CLORAZEPATE      | Clorazepate      |
| 54868268500 | DIPOTASSIUM      | Dipotassium      |
|             | CLORAZEPATE      | Clorazepate      |
| 54868268501 | DIPOTASSIUM      | Dipotassium      |
| 54868282601 | DORAL            | Quazepam         |
| 54868292900 | ALPRAZOLAM       | Alprazolam       |
| 54868292901 | ALPRAZOLAM       | Alprazolam       |
| 54868292902 | ALPRAZOLAM       | Alprazolam       |
| 54868292903 | ALPRAZOLAM       | Alprazolam       |
| 54868292904 | ALPRAZOLAM       | Alprazolam       |
| 54868292905 | ALPRAZOLAM       | Alprazolam       |
| 54868292906 | ALPRAZOLAM       | Alprazolam       |
| 54868292907 | ALPRAZOLAM       | Alprazolam       |
| 54868292908 | ALPRAZOLAM       | Alprazolam       |
| 54868293000 | ALPRAZOLAM       | Alprazolam       |
| 54868293001 | ALPRAZOLAM       | Alprazolam       |
| 54868293002 | ALPRAZOLAM       | Alprazolam       |
| 54868293003 | ALPRAZOLAM       | Alprazolam       |
| 54868293004 | ALPRAZOLAM       | Alprazolam       |
| 54868293005 | ALPRAZOLAM       | Alprazolam       |
| 54868293006 | ALPRAZOLAM       | Alprazolam       |
| 54868293007 | ALPRAZOLAM       | Alprazolam       |
| 54868293008 | ALPRAZOLAM       | Alprazolam       |
| 54868293009 | ALPRAZOLAM       | Alprazolam       |
| 54868293100 | TRIAZOLAM        | Triazolam        |
| 54868293101 | TRIAZOLAM        | Triazolam        |
| 54868293103 | TRIAZOLAM        | Triazolam        |
| 54868298300 | TRIAZOLAM        | Triazolam        |
| 54868298301 | TRIAZOLAM        | Triazolam        |

|             |                    |                    |
|-------------|--------------------|--------------------|
| 54868298302 | TRIAZOLAM          | Triazolam          |
| 54868298303 | TRIAZOLAM          | Triazolam          |
| 54868298304 | TRIAZOLAM          | Triazolam          |
| 54868298305 | TRIAZOLAM          | Triazolam          |
| 54868298306 | TRIAZOLAM          | Triazolam          |
| 54868298307 | TRIAZOLAM          | Triazolam          |
| 54868300500 | ALPRAZOLAM         | Alprazolam         |
| 54868300501 | ALPRAZOLAM         | Alprazolam         |
| 54868300502 | ALPRAZOLAM         | Alprazolam         |
| 54868300503 | ALPRAZOLAM         | Alprazolam         |
| 54868300504 | ALPRAZOLAM         | Alprazolam         |
| 54868300505 | ALPRAZOLAM         | Alprazolam         |
| 54868300506 | ALPRAZOLAM         | Alprazolam         |
| 54868300507 | ALPRAZOLAM         | Alprazolam         |
| 54868300508 | ALPRAZOLAM         | Alprazolam         |
| 54868356600 | LORAZEPAM          | Lorazepam          |
| 54868356601 | LORAZEPAM          | Lorazepam          |
| 54868356602 | LORAZEPAM          | Lorazepam          |
| 54868365700 | RESTORIL           | Temazepam          |
| 54868365701 | RESTORIL           | Temazepam          |
| 54868365702 | RESTORIL           | Temazepam          |
| 54868367000 | VALIUM             | Diazepam           |
| 54868406100 | DIAZEPAM           | Diazepam           |
|             |                    | Midazolam          |
| 54868458000 | MIDAZOLAM HCL      | Hydrochloride      |
| 54868458600 | DIAZEPAM           | Diazepam           |
| 54868466300 | ALPRAZOLAM         | Alprazolam         |
| 54868466301 | ALPRAZOLAM         | Alprazolam         |
| 54868466302 | ALPRAZOLAM         | Alprazolam         |
| 54868466303 | ALPRAZOLAM         | Alprazolam         |
| 54868466304 | ALPRAZOLAM         | Alprazolam         |
| 54868466305 | ALPRAZOLAM         | Alprazolam         |
| 54868466306 | ALPRAZOLAM         | Alprazolam         |
| 54868466307 | ALPRAZOLAM         | Alprazolam         |
| 54868549000 | DIASTAT ACUDIAL    | Diazepam;lubricant |
| 54868551500 | ALPRAZOLAM XR      | Alprazolam         |
|             |                    | Midazolam          |
| 54868571100 | MIDAZOLAM          | Hydrochloride      |
| 54868585100 | OXAZEPAM           | Oxazepam           |
| 54868585101 | OXAZEPAM           | Oxazepam           |
| 54868601000 | LORAZEPAM INTENSOL | Lorazepam          |
|             |                    | Midazolam          |
| 54868609200 | MIDAZOLAM HCL      | Hydrochloride      |

|             |                  |                             |
|-------------|------------------|-----------------------------|
| 54868609201 | MIDAZOLAM HCL    | Midazolam<br>Hydrochloride  |
| 54977002720 | LORAZEPAM        | Lorazepam                   |
| 54977002730 | LORAZEPAM        | Lorazepam                   |
| 54977002799 | LORAZEPAM        | Lorazepam                   |
| 54977002820 | LORAZEPAM        | Lorazepam                   |
|             |                  | Flurazepam                  |
| 54977008220 | FLURAZEPAM HCL   | Hydrochloride<br>Flurazepam |
| 54977008230 | FLURAZEPAM HCL   | Hydrochloride<br>Flurazepam |
| 54977008320 | FLURAZEPAM HCL   | Hydrochloride<br>Flurazepam |
| 54977008330 | FLURAZEPAM HCL   | Hydrochloride               |
|             | CHLORDIAZEPOXIDE | Chlordiazepoxide            |
| 54977018520 | HCL              | Hydrochloride               |
|             | CHLORDIAZEPOXIDE | Chlordiazepoxide            |
| 54977018599 | HCL              | Hydrochloride               |
|             | CHLORDIAZEPOXIDE | Chlordiazepoxide            |
| 54977018620 | HCL              | Hydrochloride               |
|             | CHLORDIAZEPOXIDE | Chlordiazepoxide            |
| 54977018699 | HCL              | Hydrochloride               |
|             | CHLORDIAZEPOXIDE | Chlordiazepoxide            |
| 54977018720 | HCL              | Hydrochloride               |
|             | CHLORDIAZEPOXIDE | Chlordiazepoxide            |
| 54977018799 | HCL              | Hydrochloride               |
| 54977028130 | TEMAZEPAM        | Temazepam                   |
| 54977028230 | TEMAZEPAM        | Temazepam                   |
|             | CLORAZEPATE      | Clorazepate                 |
| 54977033520 | DIPOTASSIUM      | Dipotassium                 |
|             | CLORAZEPATE      | Clorazepate                 |
| 54977033620 | DIPOTASSIUM      | Dipotassium                 |
| 54977034630 | DIAZEPAM         | Diazepam                    |
| 54977034699 | DIAZEPAM         | Diazepam                    |
| 54977034715 | DIAZEPAM         | Diazepam                    |
| 54977034730 | DIAZEPAM         | Diazepam                    |
| 54977034799 | DIAZEPAM         | Diazepam                    |
| 54977034815 | DIAZEPAM         | Diazepam                    |
| 54977034830 | DIAZEPAM         | Diazepam                    |
| 54977034899 | DIAZEPAM         | Diazepam                    |
| 55045112300 | LORAZEPAM        | Lorazepam                   |
| 55045112301 | LORAZEPAM        | Lorazepam                   |
| 55045112302 | LORAZEPAM        | Lorazepam                   |
| 55045112303 | LORAZEPAM        | Lorazepam                   |
| 55045112304 | LORAZEPAM        | Lorazepam                   |

|             |                |               |
|-------------|----------------|---------------|
| 55045112305 | LORAZEPAM      | Lorazepam     |
| 55045112306 | LORAZEPAM      | Lorazepam     |
| 55045112307 | LORAZEPAM      | Lorazepam     |
| 55045112308 | LORAZEPAM      | Lorazepam     |
| 55045117100 | DIAZEPAM       | Diazepam      |
| 55045117101 | DIAZEPAM       | Diazepam      |
| 55045117102 | DIAZEPAM       | Diazepam      |
| 55045117103 | DIAZEPAM       | Diazepam      |
| 55045117104 | DIAZEPAM       | Diazepam      |
| 55045117105 | DIAZEPAM       | Diazepam      |
| 55045117106 | DIAZEPAM       | Diazepam      |
| 55045117107 | DIAZEPAM       | Diazepam      |
| 55045117108 | DIAZEPAM       | Diazepam      |
| 55045117109 | DIAZEPAM       | Diazepam      |
| 55045121207 | DIAZEPAM       | Diazepam      |
| 55045121208 | DIAZEPAM       | Diazepam      |
| 55045125506 | LORAZEPAM      | Lorazepam     |
| 55045125508 | LORAZEPAM      | Lorazepam     |
| 55045137201 | LORAZEPAM      | Lorazepam     |
| 55045137202 | LORAZEPAM      | Lorazepam     |
| 55045137203 | LORAZEPAM      | Lorazepam     |
| 55045137204 | LORAZEPAM      | Lorazepam     |
| 55045137205 | LORAZEPAM      | Lorazepam     |
| 55045137206 | LORAZEPAM      | Lorazepam     |
| 55045137207 | LORAZEPAM      | Lorazepam     |
| 55045137208 | LORAZEPAM      | Lorazepam     |
| 55045137209 | LORAZEPAM      | Lorazepam     |
|             |                | Flurazepam    |
| 55045147700 | FLURAZEPAM HCL | Hydrochloride |
|             |                | Flurazepam    |
| 55045147701 | FLURAZEPAM HCL | Hydrochloride |
|             |                | Flurazepam    |
| 55045147703 | FLURAZEPAM HCL | Hydrochloride |
|             |                | Flurazepam    |
| 55045147704 | FLURAZEPAM HCL | Hydrochloride |
|             |                | Flurazepam    |
| 55045147706 | FLURAZEPAM HCL | Hydrochloride |
|             |                | Flurazepam    |
| 55045147707 | FLURAZEPAM HCL | Hydrochloride |
|             |                | Flurazepam    |
| 55045147708 | FLURAZEPAM HCL | Hydrochloride |
|             |                | Flurazepam    |
| 55045147709 | FLURAZEPAM HCL | Hydrochloride |
| 55045162400 | DIAZEPAM       | Diazepam      |

|             |                  |                             |
|-------------|------------------|-----------------------------|
| 55045162401 | DIAZEPAM         | Diazepam                    |
| 55045162402 | DIAZEPAM         | Diazepam                    |
| 55045162404 | DIAZEPAM         | Diazepam                    |
| 55045162405 | DIAZEPAM         | Diazepam                    |
| 55045162406 | DIAZEPAM         | Diazepam                    |
| 55045162408 | DIAZEPAM         | Diazepam                    |
| 55045162409 | DIAZEPAM         | Diazepam                    |
| 55045174600 | TEMAZEPAM        | Temazepam                   |
| 55045174601 | TEMAZEPAM        | Temazepam                   |
| 55045174602 | TEMAZEPAM        | Temazepam                   |
| 55045174603 | TEMAZEPAM        | Temazepam                   |
| 55045174604 | TEMAZEPAM        | Temazepam                   |
| 55045174606 | TEMAZEPAM        | Temazepam                   |
| 55045174608 | TEMAZEPAM        | Temazepam                   |
| 55045174609 | TEMAZEPAM        | Temazepam                   |
|             | CHLORDIAZEPOXIDE | Chlordiazepoxide            |
| 55045178108 | HCL              | Hydrochloride<br>Flurazepam |
| 55045192200 | FLURAZEPAM HCL   | Hydrochloride<br>Flurazepam |
| 55045192202 | FLURAZEPAM HCL   | Hydrochloride<br>Flurazepam |
| 55045192204 | FLURAZEPAM HCL   | Hydrochloride<br>Flurazepam |
| 55045192206 | FLURAZEPAM HCL   | Hydrochloride<br>Flurazepam |
| 55045192208 | FLURAZEPAM HCL   | Hydrochloride<br>Flurazepam |
| 55045192209 | FLURAZEPAM HCL   | Hydrochloride               |
| 55045208600 | TRIAZOLAM        | Triazolam                   |
| 55045208602 | TRIAZOLAM        | Triazolam                   |
| 55045208603 | TRIAZOLAM        | Triazolam                   |
| 55045208604 | TRIAZOLAM        | Triazolam                   |
| 55045208605 | TRIAZOLAM        | Triazolam                   |
| 55045208606 | TRIAZOLAM        | Triazolam                   |
| 55045208608 | TRIAZOLAM        | Triazolam                   |
| 55045208609 | TRIAZOLAM        | Triazolam                   |
| 55045210200 | ALPRAZOLAM       | Alprazolam                  |
| 55045210201 | ALPRAZOLAM       | Alprazolam                  |
| 55045210202 | ALPRAZOLAM       | Alprazolam                  |
| 55045210203 | ALPRAZOLAM       | Alprazolam                  |
| 55045210205 | ALPRAZOLAM       | Alprazolam                  |
| 55045210206 | ALPRAZOLAM       | Alprazolam                  |
| 55045210207 | ALPRAZOLAM       | Alprazolam                  |

|             |               |                                           |
|-------------|---------------|-------------------------------------------|
| 55045210208 | ALPRAZOLAM    | Alprazolam                                |
| 55045210209 | ALPRAZOLAM    | Alprazolam                                |
| 55045211000 | ALPRAZOLAM    | Alprazolam                                |
| 55045211001 | ALPRAZOLAM    | Alprazolam                                |
| 55045211002 | ALPRAZOLAM    | Alprazolam                                |
| 55045211003 | ALPRAZOLAM    | Alprazolam                                |
| 55045211006 | ALPRAZOLAM    | Alprazolam                                |
| 55045211007 | ALPRAZOLAM    | Alprazolam                                |
| 55045211008 | ALPRAZOLAM    | Alprazolam                                |
| 55045211009 | ALPRAZOLAM    | Alprazolam                                |
| 55045213303 | DIAZEPAM      | Diazepam                                  |
| 55045215200 | TEMAZEPAM     | Temazepam                                 |
| 55045215201 | TEMAZEPAM     | Temazepam                                 |
| 55045215203 | TEMAZEPAM     | Temazepam                                 |
| 55045215204 | TEMAZEPAM     | Temazepam                                 |
| 55045215206 | TEMAZEPAM     | Temazepam                                 |
| 55045215207 | TEMAZEPAM     | Temazepam                                 |
| 55045215208 | TEMAZEPAM     | Temazepam                                 |
| 55045215209 | TEMAZEPAM     | Temazepam                                 |
| 55045217006 | CLORAZEPATE   | Clorazepate<br>Dipotassium<br>Clorazepate |
| 55045217008 | CLORAZEPATE   | Dipotassium                               |
| 55045227800 | ALPRAZOLAM    | Alprazolam                                |
| 55045227801 | ALPRAZOLAM    | Alprazolam                                |
| 55045227802 | ALPRAZOLAM    | Alprazolam                                |
| 55045227804 | ALPRAZOLAM    | Alprazolam                                |
| 55045227806 | ALPRAZOLAM    | Alprazolam                                |
| 55045227808 | ALPRAZOLAM    | Alprazolam                                |
| 55045227809 | ALPRAZOLAM    | Alprazolam                                |
| 55045255001 | TRIAZOLAM     | Triazolam                                 |
| 55045255004 | TRIAZOLAM     | Triazolam                                 |
| 55045255008 | TRIAZOLAM     | Triazolam                                 |
| 55045256801 | ALPRAZOLAM    | Alprazolam                                |
| 55045256803 | ALPRAZOLAM    | Alprazolam                                |
| 55045256804 | ALPRAZOLAM    | Alprazolam<br>Midazolam                   |
| 55045285701 | MIDAZOLAM HCL | Hydrochloride<br>Midazolam                |
| 55045288702 | MIDAZOLAM HCL | Hydrochloride                             |
| 55045328402 | DIAZEPAM      | Diazepam                                  |
| 55045328403 | DIAZEPAM      | Diazepam                                  |
| 55045328404 | DIAZEPAM      | Diazepam                                  |
| 55045328409 | DIAZEPAM      | Diazepam                                  |

|             |             |                            |
|-------------|-------------|----------------------------|
| 55045328602 | LORAZEPAM   | Lorazepam                  |
| 55045328604 | LORAZEPAM   | Lorazepam                  |
| 55045328605 | LORAZEPAM   | Lorazepam                  |
| 55045328606 | LORAZEPAM   | Lorazepam                  |
| 55045328608 | LORAZEPAM   | Lorazepam                  |
| 55045328609 | LORAZEPAM   | Lorazepam                  |
| 55045329901 | DIAZEPAM    | Diazepam                   |
| 55045329909 | DIAZEPAM    | Diazepam                   |
| 55045330308 | RESTORIL    | Temazepam                  |
| 55045370602 | DIASTAT     | Diazepam;lubricant         |
| 55045374406 | CLORAZEPATE | Dipotassium<br>Clorazepate |
| 55045375101 | CLORAZEPATE | Dipotassium                |
| 55045375408 | TEMAZEPAM   | Temazepam                  |
| 55045375608 | ALPRAZOLAM  | Alprazolam                 |
| 55048000830 | ALPRAZOLAM  | Alprazolam                 |
| 55048000900 | ALPRAZOLAM  | Alprazolam                 |
| 55048000930 | ALPRAZOLAM  | Alprazolam                 |
| 55048000960 | ALPRAZOLAM  | Alprazolam                 |
| 55048000971 | ALPRAZOLAM  | Alprazolam                 |
| 55048000976 | ALPRAZOLAM  | Alprazolam                 |
| 55048001000 | ALPRAZOLAM  | Alprazolam                 |
| 55048001030 | ALPRAZOLAM  | Alprazolam                 |
| 55048001060 | ALPRAZOLAM  | Alprazolam                 |
| 55048001071 | ALPRAZOLAM  | Alprazolam                 |
| 55048001076 | ALPRAZOLAM  | Alprazolam                 |
| 55048001090 | ALPRAZOLAM  | Alprazolam                 |
| 55048001130 | ALPRAZOLAM  | Alprazolam                 |
| 55048001160 | ALPRAZOLAM  | Alprazolam                 |
| 55048001171 | ALPRAZOLAM  | Alprazolam                 |
| 55048001177 | ALPRAZOLAM  | Alprazolam                 |
| 55048001190 | ALPRAZOLAM  | Alprazolam                 |
| 55048007990 | CLORAZEPATE | Clorazepate                |
| 55048007990 | DIPOTASSIUM | Dipotassium                |
| 55048014530 | ALPRAZOLAM  | Alprazolam                 |
| 55048020302 | DIAZEPAM    | Diazepam                   |
| 55048020315 | DIAZEPAM    | Diazepam                   |
| 55048020330 | DIAZEPAM    | Diazepam                   |
| 55048020360 | DIAZEPAM    | Diazepam                   |
| 55048020390 | DIAZEPAM    | Diazepam                   |
| 55048020420 | DIAZEPAM    | Diazepam                   |
| 55048020430 | DIAZEPAM    | Diazepam                   |

|             |                  |                  |
|-------------|------------------|------------------|
| 55048020440 | DIAZEPAM         | Diazepam         |
| 55048020460 | DIAZEPAM         | Diazepam         |
| 55048020471 | DIAZEPAM         | Diazepam         |
| 55048020490 | DIAZEPAM         | Diazepam         |
| 55048030102 | DIAZEPAM         | Diazepam         |
| 55048030230 | DIAZEPAM         | Diazepam         |
| 55048039300 | LORAZEPAM        | Lorazepam        |
| 55048039315 | LORAZEPAM        | Lorazepam        |
| 55048039330 | LORAZEPAM        | Lorazepam        |
| 55048039371 | LORAZEPAM        | Lorazepam        |
| 55048039373 | LORAZEPAM        | Lorazepam        |
| 55048040430 | LORAZEPAM        | Lorazepam        |
| 55048040460 | LORAZEPAM        | Lorazepam        |
| 55048044190 | LORAZEPAM        | Lorazepam        |
| 55048078928 | TEMAZEPAM        | Temazepam        |
| 55048078930 | TEMAZEPAM        | Temazepam        |
| 55048079030 | TEMAZEPAM        | Temazepam        |
| 55048079060 | TEMAZEPAM        | Temazepam        |
|             | CHLORDIAZEPOXIDE | Chlordiazepoxide |
| 55081032800 | HCL              | Hydrochloride    |
|             | CHLORDIAZEPOXIDE | Chlordiazepoxide |
| 55081032801 | HCL              | Hydrochloride    |
|             | CHLORDIAZEPOXIDE | Chlordiazepoxide |
| 55081032802 | HCL              | Hydrochloride    |
| 55081057700 | DIAZEPAM         | Diazepam         |
| 55081057701 | DIAZEPAM         | Diazepam         |
| 55081057702 | DIAZEPAM         | Diazepam         |
| 55081057703 | DIAZEPAM         | Diazepam         |
| 55081057800 | DIAZEPAM         | Diazepam         |
| 55081057801 | DIAZEPAM         | Diazepam         |
| 55081057802 | DIAZEPAM         | Diazepam         |
| 55081057803 | DIAZEPAM         | Diazepam         |
| 55081057804 | DIAZEPAM         | Diazepam         |
| 55081057805 | DIAZEPAM         | Diazepam         |
| 55081057806 | DIAZEPAM         | Diazepam         |
| 55081060700 | TEMAZEPAM        | Temazepam        |
| 55081061901 | LORAZEPAM        | Lorazepam        |
| 55081065200 | LORAZEPAM        | Lorazepam        |
| 55081068600 | TEMAZEPAM        | Temazepam        |
|             |                  | Flurazepam       |
| 55081071400 | FLURAZEPAM HCL   | Hydrochloride    |
|             |                  | Flurazepam       |
| 55081071401 | FLURAZEPAM HCL   | Hydrochloride    |
| 55081071500 | FLURAZEPAM HCL   | Flurazepam       |

|             |                  |                  |
|-------------|------------------|------------------|
|             |                  | Hydrochloride    |
|             |                  | Flurazepam       |
| 55081071501 | FLURAZEPAM HCL   | Hydrochloride    |
|             |                  | Flurazepam       |
| 55081071502 | FLURAZEPAM HCL   | Hydrochloride    |
|             | CLORAZEPATE      | Clorazepate      |
| 55081074900 | DIPOTASSIUM      | Dipotassium      |
|             | CHLORDIAZEPOXIDE | Chlordiazepoxide |
| 55081090800 | HCL              | Hydrochloride    |
|             | CHLORDIAZEPOXIDE | Chlordiazepoxide |
| 55081090801 | HCL              | Hydrochloride    |
| 55081464201 | DIAZEPAM         | Diazepam         |
|             | CLORAZEPATE      | Clorazepate      |
| 55081522200 | DIPOTASSIUM      | Dipotassium      |
|             | CLORAZEPATE      | Clorazepate      |
| 55081522201 | DIPOTASSIUM      | Dipotassium      |
|             | CLORAZEPATE      | Clorazepate      |
| 55081522202 | DIPOTASSIUM      | Dipotassium      |
|             | CLORAZEPATE      | Clorazepate      |
| 55081522300 | DIPOTASSIUM      | Dipotassium      |
| 55084070301 | LORAZEPAM        | Lorazepam        |
| 55084070325 | LORAZEPAM        | Lorazepam        |
|             |                  | Flurazepam       |
| 55084071212 | FLURAZEPAM HCL   | Hydrochloride    |
|             |                  | Flurazepam       |
| 55084071220 | FLURAZEPAM HCL   | Hydrochloride    |
|             |                  | Flurazepam       |
| 55084071230 | FLURAZEPAM HCL   | Hydrochloride    |
|             |                  | Flurazepam       |
| 55084071301 | FLURAZEPAM HCL   | Hydrochloride    |
|             |                  | Flurazepam       |
| 55084071312 | FLURAZEPAM HCL   | Hydrochloride    |
|             |                  | Flurazepam       |
| 55084071330 | FLURAZEPAM HCL   | Hydrochloride    |
|             | CHLORDIAZEPOXIDE | Chlordiazepoxide |
| 55084073112 | HCL              | Hydrochloride    |
|             | CHLORDIAZEPOXIDE | Chlordiazepoxide |
| 55084073130 | HCL              | Hydrochloride    |
| 55084074512 | TEMAZEPAM        | Temazepam        |
| 55084074630 | TEMAZEPAM        | Temazepam        |
| 55084078215 | DIAZEPAM         | Diazepam         |
| 55084078230 | DIAZEPAM         | Diazepam         |
| 55084078401 | DIAZEPAM         | Diazepam         |
| 55084078415 | DIAZEPAM         | Diazepam         |
| 55084078430 | DIAZEPAM         | Diazepam         |
| 55084078460 | DIAZEPAM         | Diazepam         |

|             |                |                             |
|-------------|----------------|-----------------------------|
| 55175012802 | TEMAZEPAM      | Temazepam                   |
| 55175012803 | TEMAZEPAM      | Temazepam                   |
| 55175012804 | TEMAZEPAM      | Temazepam                   |
| 55175012806 | TEMAZEPAM      | Temazepam                   |
| 55175058301 | TEMAZEPAM      | Temazepam                   |
| 55175058303 | TEMAZEPAM      | Temazepam                   |
| 55175067800 | ALPRAZOLAM     | Alprazolam                  |
| 55175067801 | ALPRAZOLAM     | Alprazolam                  |
| 55175067802 | ALPRAZOLAM     | Alprazolam                  |
| 55175067902 | ALPRAZOLAM     | Alprazolam                  |
| 55175067903 | ALPRAZOLAM     | Alprazolam                  |
| 55175067904 | ALPRAZOLAM     | Alprazolam                  |
| 55175068001 | ALPRAZOLAM     | Alprazolam                  |
| 55175068102 | ALPRAZOLAM     | Alprazolam                  |
| 55175072000 | TRIAZOLAM      | Triazolam                   |
| 55175072001 | TRIAZOLAM      | Triazolam                   |
| 55175072004 | TRIAZOLAM      | Triazolam                   |
| 55175072005 | TRIAZOLAM      | Triazolam                   |
| 55175074300 | XANAX          | Alprazolam<br>Flurazepam    |
| 55175080700 | FLURAZEPAM HCL | Hydrochloride<br>Flurazepam |
| 55175080705 | FLURAZEPAM HCL | Hydrochloride               |
| 55175169501 | HALCION        | Triazolam                   |
| 55175169502 | HALCION        | Triazolam                   |
| 55175169504 | HALCION        | Triazolam                   |
| 55175169505 | HALCION        | Triazolam                   |
| 55175169507 | HALCION        | Triazolam                   |
| 55175419000 | DIAZEPAM       | Diazepam                    |
| 55175419002 | DIAZEPAM       | Diazepam                    |
| 55175419100 | DIAZEPAM       | Diazepam                    |
| 55175419101 | DIAZEPAM       | Diazepam                    |
| 55175419102 | DIAZEPAM       | Diazepam                    |
| 55175419103 | DIAZEPAM       | Diazepam                    |
| 55175419105 | DIAZEPAM       | Diazepam                    |
| 55175419106 | DIAZEPAM       | Diazepam                    |
| 55175419108 | DIAZEPAM       | Diazepam                    |
| 55175441303 | DIAZEPAM       | Diazepam                    |
| 55175500401 | DIAZEPAM       | Diazepam                    |
| 55175500501 | DIAZEPAM       | Diazepam                    |
| 55175500601 | DIAZEPAM       | Diazepam                    |
| 55175501101 | ATIVAN         | Lorazepam                   |
| 55175502401 | VERSED         | Midazolam                   |

|             |                  |                  |
|-------------|------------------|------------------|
|             |                  | Hydrochloride    |
|             |                  | Midazolam        |
| 55175502501 | VERSED           | Hydrochloride    |
|             |                  | Midazolam        |
| 55175502801 | VERSED           | Hydrochloride    |
| 55175532003 | LORAZEPAM        | Lorazepam        |
| 55175532005 | LORAZEPAM        | Lorazepam        |
| 55289001130 | XANAX            | Alprazolam       |
|             |                  | Flurazepam       |
| 55289003830 | FLURAZEPAM HCL   | Hydrochloride    |
|             | CHLORDIAZEPOXIDE | Chlordiazepoxide |
| 55289006106 | HCL              | Hydrochloride    |
|             | CHLORDIAZEPOXIDE | Chlordiazepoxide |
| 55289006130 | HCL              | Hydrochloride    |
|             | CHLORDIAZEPOXIDE | Chlordiazepoxide |
| 55289006160 | HCL              | Hydrochloride    |
|             | CHLORDIAZEPOXIDE | Chlordiazepoxide |
| 55289006197 | HCL              | Hydrochloride    |
| 55289009106 | DIAZEPAM         | Diazepam         |
| 55289009109 | DIAZEPAM         | Diazepam         |
| 55289009110 | DIAZEPAM         | Diazepam         |
| 55289009112 | DIAZEPAM         | Diazepam         |
| 55289009115 | DIAZEPAM         | Diazepam         |
| 55289009121 | DIAZEPAM         | Diazepam         |
| 55289009130 | DIAZEPAM         | Diazepam         |
| 55289009160 | DIAZEPAM         | Diazepam         |
| 55289009190 | DIAZEPAM         | Diazepam         |
| 55289009197 | DIAZEPAM         | Diazepam         |
| 55289009201 | DIAZEPAM         | Diazepam         |
| 55289009202 | DIAZEPAM         | Diazepam         |
| 55289009206 | DIAZEPAM         | Diazepam         |
| 55289009210 | DIAZEPAM         | Diazepam         |
| 55289009217 | DIAZEPAM         | Diazepam         |
| 55289009220 | DIAZEPAM         | Diazepam         |
| 55289009225 | DIAZEPAM         | Diazepam         |
| 55289009230 | DIAZEPAM         | Diazepam         |
| 55289009240 | DIAZEPAM         | Diazepam         |
| 55289009260 | DIAZEPAM         | Diazepam         |
| 55289009290 | DIAZEPAM         | Diazepam         |
| 55289009298 | DIAZEPAM         | Diazepam         |
| 55289011706 | VALIUM           | Diazepam         |
| 55289011712 | VALIUM           | Diazepam         |
| 55289011720 | VALIUM           | Diazepam         |
| 55289012697 | CHLORDIAZEPOXIDE | Chlordiazepoxide |

|             |            |               |
|-------------|------------|---------------|
|             | HCL        | Hydrochloride |
| 55289012820 | HALCION    | Triazolam     |
| 55289019614 | TEMAZEPAM  | Temazepam     |
| 55289019630 | TEMAZEPAM  | Temazepam     |
| 55289019660 | TEMAZEPAM  | Temazepam     |
| 55289019690 | TEMAZEPAM  | Temazepam     |
| 55289019697 | TEMAZEPAM  | Temazepam     |
| 55289034530 | XANAX      | Alprazolam    |
| 55289034610 | XANAX      | Alprazolam    |
| 55289034620 | XANAX      | Alprazolam    |
| 55289034630 | XANAX      | Alprazolam    |
| 55289040230 | LORAZEPAM  | Lorazepam     |
| 55289040290 | LORAZEPAM  | Lorazepam     |
|             |            | Midazolam     |
| 55289044402 | VERSED     | Hydrochloride |
|             |            | Midazolam     |
| 55289044405 | VERSED     | Hydrochloride |
|             |            | Midazolam     |
| 55289044410 | VERSED     | Hydrochloride |
|             |            | Midazolam     |
| 55289044810 | VERSED     | Hydrochloride |
| 55289048702 | LORAZEPAM  | Lorazepam     |
| 55289048704 | LORAZEPAM  | Lorazepam     |
| 55289048706 | LORAZEPAM  | Lorazepam     |
| 55289048708 | LORAZEPAM  | Lorazepam     |
| 55289048709 | LORAZEPAM  | Lorazepam     |
| 55289048715 | LORAZEPAM  | Lorazepam     |
| 55289048720 | LORAZEPAM  | Lorazepam     |
| 55289048730 | LORAZEPAM  | Lorazepam     |
| 55289048760 | LORAZEPAM  | Lorazepam     |
| 55289048779 | LORAZEPAM  | Lorazepam     |
| 55289048790 | LORAZEPAM  | Lorazepam     |
| 55289048797 | LORAZEPAM  | Lorazepam     |
| 55289048798 | LORAZEPAM  | Lorazepam     |
| 55289052301 | ALPRAZOLAM | Alprazolam    |
| 55289052330 | ALPRAZOLAM | Alprazolam    |
| 55289052340 | ALPRAZOLAM | Alprazolam    |
| 55289052360 | ALPRAZOLAM | Alprazolam    |
| 55289052390 | ALPRAZOLAM | Alprazolam    |
| 55289059401 | LORAZEPAM  | Lorazepam     |
| 55289059430 | LORAZEPAM  | Lorazepam     |
| 55289059460 | LORAZEPAM  | Lorazepam     |
| 55289059490 | LORAZEPAM  | Lorazepam     |
| 55289059497 | LORAZEPAM  | Lorazepam     |

|             |                |                            |
|-------------|----------------|----------------------------|
| 55289066030 | TEMAZEPAM      | Temazepam                  |
| 55289066060 | TEMAZEPAM      | Temazepam                  |
| 55289066090 | TEMAZEPAM      | Temazepam                  |
| 55289078702 | TRIAZOLAM      | Triazolam                  |
| 55289078730 | TRIAZOLAM      | Triazolam                  |
| 55289078760 | TRIAZOLAM      | Triazolam                  |
| 55289079002 | TRIAZOLAM      | Triazolam                  |
|             | CLORAZEPATE    | Clorazepate                |
| 55289086030 | DIPOTASSIUM    | Dipotassium                |
| 55289092006 | ALPRAZOLAM     | Alprazolam                 |
| 55289092030 | ALPRAZOLAM     | Alprazolam                 |
| 55289092040 | ALPRAZOLAM     | Alprazolam                 |
| 55289092060 | ALPRAZOLAM     | Alprazolam                 |
| 55289092090 | ALPRAZOLAM     | Alprazolam                 |
| 55289092098 | ALPRAZOLAM     | Alprazolam                 |
| 55289094506 | ALPRAZOLAM     | Alprazolam                 |
| 55289094515 | ALPRAZOLAM     | Alprazolam                 |
| 55289094530 | ALPRAZOLAM     | Alprazolam                 |
| 55289094560 | ALPRAZOLAM     | Alprazolam                 |
| 55289094590 | ALPRAZOLAM     | Alprazolam                 |
| 55289094591 | ALPRAZOLAM     | Alprazolam                 |
| 55289094598 | ALPRAZOLAM     | Alprazolam                 |
| 55289096205 | ALPRAZOLAM     | Alprazolam                 |
| 55289096220 | ALPRAZOLAM     | Alprazolam                 |
| 55289096230 | ALPRAZOLAM     | Alprazolam                 |
| 55289096260 | ALPRAZOLAM     | Alprazolam                 |
| 55289096290 | ALPRAZOLAM     | Alprazolam                 |
| 55289096298 | ALPRAZOLAM     | Alprazolam                 |
| 55289097920 | DIAZEPAM       | Diazepam                   |
| 55289097930 | DIAZEPAM       | Diazepam                   |
| 55289097960 | DIAZEPAM       | Diazepam                   |
|             |                | Clorazepate                |
| 55292030101 | TRANXENE T-TAB | Dipotassium<br>Clorazepate |
| 55292030201 | TRANXENE T-TAB | Dipotassium<br>Clorazepate |
| 55292030301 | TRANXENE T-TAB | Dipotassium                |
| 55370017707 | LORAZEPAM      | Lorazepam                  |
| 55370017907 | LORAZEPAM      | Lorazepam                  |
| 55370017908 | LORAZEPAM      | Lorazepam                  |
| 55370018007 | LORAZEPAM      | Lorazepam                  |
| 55370018008 | LORAZEPAM      | Lorazepam                  |
| 55370082807 | DIAZEPAM       | Diazepam                   |
| 55370082907 | DIAZEPAM       | Diazepam                   |

|             |               |                            |
|-------------|---------------|----------------------------|
| 55390012510 | MIDAZOLAM HCL | Midazolam<br>Hydrochloride |
| 55390012605 | MIDAZOLAM HCL | Midazolam<br>Hydrochloride |
| 55390012610 | MIDAZOLAM HCL | Midazolam<br>Hydrochloride |
| 55390013702 | MIDAZOLAM HCL | Midazolam<br>Hydrochloride |
| 55390013705 | MIDAZOLAM HCL | Midazolam<br>Hydrochloride |
| 55390013801 | MIDAZOLAM HCL | Midazolam<br>Hydrochloride |
| 55390013802 | MIDAZOLAM HCL | Midazolam<br>Hydrochloride |
| 55390016810 | LORAZEPAM     | Lorazepam                  |
| 55390016910 | LORAZEPAM     | Lorazepam                  |
| 55390017010 | LORAZEPAM     | Lorazepam                  |
| 55390017110 | LORAZEPAM     | Lorazepam                  |
| 55665044510 | DIAZEPAM      | Diazepam                   |
| 55700003930 | QUAZEPAM      | Quazepam                   |
| 55700005803 | DIAZEPAM      | Diazepam                   |
| 55700010960 | ALPRAZOLAM XR | Alprazolam                 |
| 55700031030 | DIAZEPAM      | Diazepam                   |
| 55700031230 | ALPRAZOLAM    | Alprazolam                 |
| 55700031260 | ALPRAZOLAM    | Alprazolam                 |
| 55700031290 | ALPRAZOLAM    | Alprazolam                 |
| 55700031330 | ALPRAZOLAM    | Alprazolam                 |
| 55700031360 | ALPRAZOLAM    | Alprazolam                 |
| 55700031390 | ALPRAZOLAM    | Alprazolam                 |
| 55700042230 | ALPRAZOLAM    | Alprazolam                 |
| 55700042260 | ALPRAZOLAM    | Alprazolam                 |
| 55700042290 | ALPRAZOLAM    | Alprazolam                 |
| 55700043930 | DIAZEPAM      | Diazepam                   |
| 55700043960 | DIAZEPAM      | Diazepam                   |
| 55700043990 | DIAZEPAM      | Diazepam                   |
| 55700044230 | DIAZEPAM      | Diazepam                   |
| 55700044260 | DIAZEPAM      | Diazepam                   |
| 55700044290 | DIAZEPAM      | Diazepam                   |
| 55806030104 | TRIAZOLAM     | Triazolam                  |
| 55806030204 | TRIAZOLAM     | Triazolam                  |
| 55806034003 | ALPRAZOLAM    | Alprazolam                 |
| 55806034004 | ALPRAZOLAM    | Alprazolam                 |
| 55806034103 | ALPRAZOLAM    | Alprazolam                 |
| 55806034104 | ALPRAZOLAM    | Alprazolam                 |

|             |                                    |                                   |
|-------------|------------------------------------|-----------------------------------|
| 55806034203 | ALPRAZOLAM                         | Alprazolam                        |
| 55806034204 | ALPRAZOLAM                         | Alprazolam                        |
| 55829083110 | DIAZEPAM                           | Diazepam                          |
| 55829083210 | DIAZEPAM                           | Diazepam                          |
| 55829083310 | DIAZEPAM                           | Diazepam<br>Flurazepam            |
| 55829083610 | FLURAZEPAM HCL                     | Hydrochloride<br>Flurazepam       |
| 55829083910 | FLURAZEPAM HCL<br>CHLORDIAZEPOXIDE | Hydrochloride<br>Chlordiazepoxide |
| 55829084410 | HCL<br>CHLORDIAZEPOXIDE            | Hydrochloride<br>Chlordiazepoxide |
| 55829084510 | HCL<br>CHLORDIAZEPOXIDE            | Hydrochloride<br>Chlordiazepoxide |
| 55829084610 | HCL                                | Hydrochloride                     |
| 55829085110 | LORAZEPAM                          | Lorazepam                         |
| 55829085210 | LORAZEPAM                          | Lorazepam                         |
| 55829085310 | LORAZEPAM                          | Lorazepam                         |
| 55829086710 | OXAZEPAM                           | Oxazepam                          |
| 55829086810 | OXAZEPAM                           | Oxazepam                          |
| 55829086910 | OXAZEPAM                           | Oxazepam                          |
| 55829087510 | TEMAZEPAM                          | Temazepam                         |
| 55829087610 | TEMAZEPAM<br>CLORAZEPATE           | Temazepam<br>Clorazepate          |
| 55887015730 | DIPOTASSIUM<br>CLORAZEPATE         | Dipotassium<br>Clorazepate        |
| 55887015830 | DIPOTASSIUM<br>CLORAZEPATE         | Dipotassium<br>Clorazepate        |
| 55887015860 | DIPOTASSIUM<br>CLORAZEPATE         | Dipotassium<br>Clorazepate        |
| 55887015930 | DIPOTASSIUM                        | Dipotassium<br>Flurazepam         |
| 55887017030 | FLURZEPAM                          | Hydrochloride<br>Flurazepam       |
| 55887017060 | FLURZEPAM                          | Hydrochloride<br>Flurazepam       |
| 55887017090 | FLURZEPAM                          | Hydrochloride                     |
| 55887018230 | ALPRAZOLAM                         | Alprazolam                        |
| 55887018260 | ALPRAZOLAM                         | Alprazolam                        |
| 55887018290 | ALPRAZOLAM                         | Alprazolam<br>Flurazepam          |
| 55887018530 | FLURAZEPAM HCL                     | Hydrochloride<br>Flurazepam       |
| 55887018560 | FLURAZEPAM HCL                     | Hydrochloride<br>Flurazepam       |
| 55887018590 | FLURAZEPAM HCL                     | Hydrochloride                     |

|             |            |            |
|-------------|------------|------------|
| 55887024505 | ALPRAZOLAM | Alprazolam |
| 55887024530 | ALPRAZOLAM | Alprazolam |
| 55887024560 | ALPRAZOLAM | Alprazolam |
| 55887024582 | ALPRAZOLAM | Alprazolam |
| 55887024590 | ALPRAZOLAM | Alprazolam |
| 55887025030 | LORAZEPAM  | Lorazepam  |
| 55887025060 | LORAZEPAM  | Lorazepam  |
| 55887025082 | LORAZEPAM  | Lorazepam  |
| 55887025090 | LORAZEPAM  | Lorazepam  |
| 55887028020 | ALPRAZOLAM | Alprazolam |
| 55887028030 | ALPRAZOLAM | Alprazolam |
| 55887028060 | ALPRAZOLAM | Alprazolam |
| 55887028090 | ALPRAZOLAM | Alprazolam |
| 55887031901 | TRIAZOLAM  | Triazolam  |
| 55887031960 | TRIAZOLAM  | Triazolam  |
| 55887031990 | TRIAZOLAM  | Triazolam  |
| 55887038230 | ALPRAZOLAM | Alprazolam |
| 55887038260 | ALPRAZOLAM | Alprazolam |
| 55887043607 | TEMAZEPAM  | Temazepam  |
| 55887043615 | TEMAZEPAM  | Temazepam  |
| 55887043630 | TEMAZEPAM  | Temazepam  |
| 55887043660 | TEMAZEPAM  | Temazepam  |
| 55887043682 | TEMAZEPAM  | Temazepam  |
| 55887043690 | TEMAZEPAM  | Temazepam  |
| 55887043707 | TEMAZEPAM  | Temazepam  |
| 55887043715 | TEMAZEPAM  | Temazepam  |
| 55887043720 | TEMAZEPAM  | Temazepam  |
| 55887043730 | TEMAZEPAM  | Temazepam  |
| 55887043760 | TEMAZEPAM  | Temazepam  |
| 55887043782 | TEMAZEPAM  | Temazepam  |
| 55887043790 | TEMAZEPAM  | Temazepam  |
| 55887052201 | DIAZEPAM   | Diazepam   |
| 55887052204 | DIAZEPAM   | Diazepam   |
| 55887052210 | DIAZEPAM   | Diazepam   |
| 55887052220 | DIAZEPAM   | Diazepam   |
| 55887052230 | DIAZEPAM   | Diazepam   |
| 55887052240 | DIAZEPAM   | Diazepam   |
| 55887052250 | DIAZEPAM   | Diazepam   |
| 55887052260 | DIAZEPAM   | Diazepam   |
| 55887052282 | DIAZEPAM   | Diazepam   |
| 55887052290 | DIAZEPAM   | Diazepam   |
| 55887063310 | LORAZEPAM  | Lorazepam  |
| 55887063315 | LORAZEPAM  | Lorazepam  |

|             |                  |                  |
|-------------|------------------|------------------|
| 55887063320 | LORAZEPAM        | Lorazepam        |
| 55887063330 | LORAZEPAM        | Lorazepam        |
| 55887063360 | LORAZEPAM        | Lorazepam        |
| 55887063390 | LORAZEPAM        | Lorazepam        |
| 55887064820 | ALPRAZOLAM       | Alprazolam       |
| 55887064821 | ALPRAZOLAM       | Alprazolam       |
| 55887064830 | ALPRAZOLAM       | Alprazolam       |
| 55887064860 | ALPRAZOLAM       | Alprazolam       |
| 55887064890 | ALPRAZOLAM       | Alprazolam       |
| 55887068604 | DIAZEPAM         | Diazepam         |
| 55887068610 | DIAZEPAM         | Diazepam         |
| 55887068612 | DIAZEPAM         | Diazepam         |
| 55887068614 | DIAZEPAM         | Diazepam         |
| 55887068615 | DIAZEPAM         | Diazepam         |
| 55887068620 | DIAZEPAM         | Diazepam         |
| 55887068630 | DIAZEPAM         | Diazepam         |
| 55887068640 | DIAZEPAM         | Diazepam         |
| 55887068660 | DIAZEPAM         | Diazepam         |
| 55887068682 | DIAZEPAM         | Diazepam         |
| 55887068690 | DIAZEPAM         | Diazepam         |
|             |                  | Chlordiazepoxide |
| 55887084830 | CHLORDIAZEPOXIDE | Hydrochloride    |
|             |                  | Chlordiazepoxide |
| 55887085630 | CHLORDIAZEPOXIDE | Hydrochloride    |
| 55887094830 | LORAZEPAM        | Lorazepam        |
| 55887094860 | LORAZEPAM        | Lorazepam        |
| 55887094890 | LORAZEPAM        | Lorazepam        |
| 55953012640 | ALPRAZOLAM       | Alprazolam       |
| 55953012670 | ALPRAZOLAM       | Alprazolam       |
| 55953012680 | ALPRAZOLAM       | Alprazolam       |
| 55953012740 | ALPRAZOLAM       | Alprazolam       |
| 55953012770 | ALPRAZOLAM       | Alprazolam       |
| 55953012780 | ALPRAZOLAM       | Alprazolam       |
| 55953013140 | ALPRAZOLAM       | Alprazolam       |
| 55953013170 | ALPRAZOLAM       | Alprazolam       |
| 55953013180 | ALPRAZOLAM       | Alprazolam       |
| 55953086840 | ALPRAZOLAM       | Alprazolam       |
| 55953086870 | ALPRAZOLAM       | Alprazolam       |
| 55953088040 | ALPRAZOLAM       | Alprazolam       |
| 55953088070 | ALPRAZOLAM       | Alprazolam       |
| 55953089140 | ALPRAZOLAM       | Alprazolam       |
| 55953089170 | ALPRAZOLAM       | Alprazolam       |
| 55953098140 | CLORAZEPATE      | Clorazepate      |

|             |                  |                  |
|-------------|------------------|------------------|
|             | DIPOTASSIUM      | Dipotassium      |
|             | CLORAZEPATE      | Clorazepate      |
| 55953098170 | DIPOTASSIUM      | Dipotassium      |
|             | CLORAZEPATE      | Clorazepate      |
| 55953098240 | DIPOTASSIUM      | Dipotassium      |
|             | CLORAZEPATE      | Clorazepate      |
| 55953098270 | DIPOTASSIUM      | Dipotassium      |
|             | CLORAZEPATE      | Clorazepate      |
| 55953098340 | DIPOTASSIUM      | Dipotassium      |
| 57247010300 | DIAZEPAM         | Diazepam         |
| 57247010302 | DIAZEPAM         | Diazepam         |
| 57247010303 | DIAZEPAM         | Diazepam         |
| 57247010400 | DIAZEPAM         | Diazepam         |
| 57247010402 | DIAZEPAM         | Diazepam         |
| 57247010403 | DIAZEPAM         | Diazepam         |
| 57247010500 | DIAZEPAM         | Diazepam         |
| 57247010502 | DIAZEPAM         | Diazepam         |
| 57247010503 | DIAZEPAM         | Diazepam         |
|             |                  | Flurazepam       |
| 57247010700 | FLURAZEPAM HCL   | Hydrochloride    |
|             |                  | Flurazepam       |
| 57247010702 | FLURAZEPAM HCL   | Hydrochloride    |
|             |                  | Flurazepam       |
| 57247010800 | FLURAZEPAM HCL   | Hydrochloride    |
|             |                  | Flurazepam       |
| 57247010802 | FLURAZEPAM HCL   | Hydrochloride    |
| 57247010900 | LORAZEPAM        | Lorazepam        |
| 57247010902 | LORAZEPAM        | Lorazepam        |
| 57247011000 | LORAZEPAM        | Lorazepam        |
| 57247011002 | LORAZEPAM        | Lorazepam        |
| 57247011003 | LORAZEPAM        | Lorazepam        |
| 57247011100 | LORAZEPAM        | Lorazepam        |
| 57247011102 | LORAZEPAM        | Lorazepam        |
|             | CHLORDIAZEPOXIDE | Chlordiazepoxide |
| 57247011300 | HCL              | Hydrochloride    |
|             | CHLORDIAZEPOXIDE | Chlordiazepoxide |
| 57247011302 | HCL              | Hydrochloride    |
|             | CHLORDIAZEPOXIDE | Chlordiazepoxide |
| 57247011303 | HCL              | Hydrochloride    |
|             | CHLORDIAZEPOXIDE | Chlordiazepoxide |
| 57247011400 | HCL              | Hydrochloride    |
|             | CHLORDIAZEPOXIDE | Chlordiazepoxide |
| 57247011402 | HCL              | Hydrochloride    |
|             | CHLORDIAZEPOXIDE | Chlordiazepoxide |
| 57247011403 | HCL              | Hydrochloride    |
| 57247011500 | CHLORDIAZEPOXIDE | Chlordiazepoxide |

|             |                  |                  |
|-------------|------------------|------------------|
|             | HCL              | Hydrochloride    |
|             | CHLORDIAZEPOXIDE | Chlordiazepoxide |
| 57247011502 | HCL              | Hydrochloride    |
|             | CHLORDIAZEPOXIDE | Chlordiazepoxide |
| 57247011503 | HCL              | Hydrochloride    |
| 57424009732 | TEMAZEPAM        | Temazepam        |
| 57424009832 | TEMAZEPAM        | Temazepam        |
|             | CHLORDIAZEPOXIDE | Chlordiazepoxide |
| 57424028032 | HCL              | Hydrochloride    |
|             | CHLORDIAZEPOXIDE | Chlordiazepoxide |
| 57424028132 | HCL              | Hydrochloride    |
|             | CHLORDIAZEPOXIDE | Chlordiazepoxide |
| 57424028232 | HCL              | Hydrochloride    |
| 57424030532 | DIAZEPAM         | Diazepam         |
| 57424030632 | DIAZEPAM         | Diazepam         |
| 57424030732 | DIAZEPAM         | Diazepam         |
| 57424037532 | LORAZEPAM        | Lorazepam        |
| 57424037632 | LORAZEPAM        | Lorazepam        |
| 57424037732 | LORAZEPAM        | Lorazepam        |
| 57480050106 | LORAZEPAM        | Lorazepam        |
| 57480050206 | LORAZEPAM        | Lorazepam        |
| 57480050306 | LORAZEPAM        | Lorazepam        |
| 57480050801 | TEMAZEPAM        | Temazepam        |
| 57480050806 | TEMAZEPAM        | Temazepam        |
| 57480050901 | TEMAZEPAM        | Temazepam        |
| 57480050906 | TEMAZEPAM        | Temazepam        |
|             |                  | Flurazepam       |
| 57480051001 | FLURAZEPAM HCL   | Hydrochloride    |
|             |                  | Flurazepam       |
| 57480051006 | FLURAZEPAM HCL   | Hydrochloride    |
|             |                  | Flurazepam       |
| 57480051101 | FLURAZEPAM HCL   | Hydrochloride    |
|             |                  | Flurazepam       |
| 57480051106 | FLURAZEPAM HCL   | Hydrochloride    |
| 57480051206 | OXAZEPAM         | Oxazepam         |
| 57480051306 | OXAZEPAM         | Oxazepam         |
| 57480051406 | OXAZEPAM         | Oxazepam         |
| 57480051501 | DIAZEPAM         | Diazepam         |
| 57480051506 | DIAZEPAM         | Diazepam         |
| 57480051601 | DIAZEPAM         | Diazepam         |
| 57480051606 | DIAZEPAM         | Diazepam         |
| 57480051701 | DIAZEPAM         | Diazepam         |
| 57480051706 | DIAZEPAM         | Diazepam         |
| 57480052001 | ALPRAZOLAM       | Alprazolam       |
| 57480052006 | ALPRAZOLAM       | Alprazolam       |

|             |                |               |
|-------------|----------------|---------------|
| 57480052101 | ALPRAZOLAM     | Alprazolam    |
| 57480052106 | ALPRAZOLAM     | Alprazolam    |
| 57480052201 | ALPRAZOLAM     | Alprazolam    |
| 57480052206 | ALPRAZOLAM     | Alprazolam    |
| 57664014008 | LORAZEPAM      | Lorazepam     |
| 57664014013 | LORAZEPAM      | Lorazepam     |
| 57664014108 | LORAZEPAM      | Lorazepam     |
| 57664014113 | LORAZEPAM      | Lorazepam     |
| 57664014208 | LORAZEPAM      | Lorazepam     |
|             |                | Midazolam     |
| 57664063343 | MIDAZOLAM      | Hydrochloride |
|             |                | Midazolam     |
| 57664063444 | MIDAZOLAM      | Hydrochloride |
|             |                | Midazolam     |
| 57664063445 | MIDAZOLAM      | Hydrochloride |
|             |                | Flurazepam    |
| 57783611401 | FLURAZEPAM HCL | Hydrochloride |
|             |                | Flurazepam    |
| 57783611402 | FLURAZEPAM HCL | Hydrochloride |
|             |                | Flurazepam    |
| 57783612701 | FLURAZEPAM HCL | Hydrochloride |
|             |                | Flurazepam    |
| 57783612702 | FLURAZEPAM HCL | Hydrochloride |
| 57801028322 | LORAZEPAM      | Lorazepam     |
| 57801028422 | LORAZEPAM      | Lorazepam     |
| 57801028522 | LORAZEPAM      | Lorazepam     |
| 57801028822 | TEMAZEPAM      | Temazepam     |
|             |                | Flurazepam    |
| 57801031222 | FLURAZEPAM HCL | Hydrochloride |
|             |                | Flurazepam    |
| 57801031322 | FLURAZEPAM HCL | Hydrochloride |
| 57801031622 | TEMAZEPAM      | Temazepam     |
| 57866359101 | DIAZEPAM       | Diazepam      |
| 57866359201 | DIAZEPAM       | Diazepam      |
| 57866359202 | DIAZEPAM       | Diazepam      |
| 57866359203 | DIAZEPAM       | Diazepam      |
| 57866359204 | DIAZEPAM       | Diazepam      |
| 57866359205 | DIAZEPAM       | Diazepam      |
| 57866359206 | DIAZEPAM       | Diazepam      |
| 57866359208 | DIAZEPAM       | Diazepam      |
| 57866359301 | DIAZEPAM       | Diazepam      |
| 57866359302 | DIAZEPAM       | Diazepam      |
| 57866359303 | DIAZEPAM       | Diazepam      |
| 57866359304 | DIAZEPAM       | Diazepam      |
| 57866359305 | DIAZEPAM       | Diazepam      |

|             |                            |                             |
|-------------|----------------------------|-----------------------------|
| 57866359307 | DIAZEPAM                   | Diazepam<br>Flurazepam      |
| 57866379501 | FLURAZEPAM HCL             | Hydrochloride<br>Flurazepam |
| 57866379502 | FLURAZEPAM HCL             | Hydrochloride<br>Flurazepam |
| 57866379601 | FLURAZEPAM HCL             | Hydrochloride<br>Flurazepam |
| 57866379602 | FLURAZEPAM HCL             | Hydrochloride               |
| 57866395901 | LORAZEPAM                  | Lorazepam                   |
| 57866395902 | LORAZEPAM                  | Lorazepam                   |
| 57866395903 | LORAZEPAM                  | Lorazepam                   |
| 57866396001 | LORAZEPAM                  | Lorazepam                   |
| 57866396002 | LORAZEPAM                  | Lorazepam                   |
| 57866396003 | LORAZEPAM                  | Lorazepam                   |
| 57866396004 | LORAZEPAM                  | Lorazepam                   |
| 57866396101 | LORAZEPAM                  | Lorazepam                   |
| 57866396102 | LORAZEPAM                  | Lorazepam                   |
| 57866462801 | TEMAZEPAM                  | Temazepam                   |
| 57866462802 | TEMAZEPAM                  | Temazepam                   |
| 57866462803 | TEMAZEPAM                  | Temazepam                   |
| 57866462804 | TEMAZEPAM                  | Temazepam                   |
| 57866462901 | TEMAZEPAM                  | Temazepam                   |
| 57866462902 | TEMAZEPAM                  | Temazepam                   |
| 57866462903 | TEMAZEPAM                  | Temazepam                   |
| 57866462904 | TEMAZEPAM                  | Temazepam                   |
| 57866463401 | ALPRAZOLAM                 | Alprazolam                  |
| 57866463402 | ALPRAZOLAM                 | Alprazolam                  |
| 57866463403 | ALPRAZOLAM                 | Alprazolam                  |
| 57866463406 | ALPRAZOLAM                 | Alprazolam                  |
| 57866463501 | ALPRAZOLAM                 | Alprazolam                  |
| 57866463502 | ALPRAZOLAM                 | Alprazolam                  |
| 57866463503 | ALPRAZOLAM                 | Alprazolam                  |
| 57866463504 | ALPRAZOLAM                 | Alprazolam                  |
| 57866463601 | ALPRAZOLAM                 | Alprazolam                  |
| 57866463602 | ALPRAZOLAM                 | Alprazolam                  |
| 57866463603 | ALPRAZOLAM                 | Alprazolam                  |
| 57866463604 | ALPRAZOLAM<br>CLORAZEPATE  | Alprazolam<br>Clorazepate   |
| 57866494001 | DIPOTASSIUM<br>CLORAZEPATE | Dipotassium<br>Clorazepate  |
| 57866494101 | DIPOTASSIUM                | Dipotassium                 |
| 57866697000 | OXAZEPAM                   | Oxazepam                    |
| 57866697101 | OXAZEPAM                   | Oxazepam                    |

|             |            |                                   |
|-------------|------------|-----------------------------------|
| 57866697103 | OXAZEPAM   | Oxazepam                          |
| 57866697201 | OXAZEPAM   | Oxazepam                          |
| 57866903501 | TRIAZOLAM  | Triazolam                         |
| 57866903502 | TRIAZOLAM  | Triazolam                         |
| 57866903503 | TRIAZOLAM  | Triazolam                         |
| 57866903601 | TRIAZOLAM  | Triazolam                         |
| 57866903602 | TRIAZOLAM  | Triazolam                         |
| 57866903603 | TRIAZOLAM  | Triazolam                         |
| 58016001810 | DIAZEPAM   | Diazepam                          |
| 58016003300 | XANAX      | Alprazolam                        |
| 58016003330 | XANAX      | Alprazolam                        |
| 58016003360 | XANAX      | Alprazolam                        |
| 58016003390 | XANAX      | Alprazolam                        |
| 58016006400 | LIBRIUM    | Chlordiazepoxide<br>Hydrochloride |
| 58016006430 | LIBRIUM    | Chlordiazepoxide<br>Hydrochloride |
| 58016006460 | LIBRIUM    | Chlordiazepoxide<br>Hydrochloride |
| 58016006490 | LIBRIUM    | Chlordiazepoxide<br>Hydrochloride |
| 58016009900 | XANAX      | Alprazolam                        |
| 58016009930 | XANAX      | Alprazolam                        |
| 58016009960 | XANAX      | Alprazolam                        |
| 58016009990 | XANAX      | Alprazolam                        |
| 58016019700 | ALPRAZOLAM | Alprazolam                        |
| 58016019702 | ALPRAZOLAM | Alprazolam                        |
| 58016019703 | ALPRAZOLAM | Alprazolam                        |
| 58016019706 | ALPRAZOLAM | Alprazolam                        |
| 58016019709 | ALPRAZOLAM | Alprazolam                        |
| 58016019710 | ALPRAZOLAM | Alprazolam                        |
| 58016019712 | ALPRAZOLAM | Alprazolam                        |
| 58016019714 | ALPRAZOLAM | Alprazolam                        |
| 58016019715 | ALPRAZOLAM | Alprazolam                        |
| 58016019718 | ALPRAZOLAM | Alprazolam                        |
| 58016019720 | ALPRAZOLAM | Alprazolam                        |
| 58016019724 | ALPRAZOLAM | Alprazolam                        |
| 58016019730 | ALPRAZOLAM | Alprazolam                        |
| 58016019750 | ALPRAZOLAM | Alprazolam                        |
| 58016019760 | ALPRAZOLAM | Alprazolam                        |
| 58016019773 | ALPRAZOLAM | Alprazolam                        |
| 58016019789 | ALPRAZOLAM | Alprazolam                        |
| 58016019790 | ALPRAZOLAM | Alprazolam                        |
| 58016019800 | ALPRAZOLAM | Alprazolam                        |

|             |            |            |
|-------------|------------|------------|
| 58016019802 | ALPRAZOLAM | Alprazolam |
| 58016019803 | ALPRAZOLAM | Alprazolam |
| 58016019812 | ALPRAZOLAM | Alprazolam |
| 58016019815 | ALPRAZOLAM | Alprazolam |
| 58016019820 | ALPRAZOLAM | Alprazolam |
| 58016019830 | ALPRAZOLAM | Alprazolam |
| 58016019860 | ALPRAZOLAM | Alprazolam |
| 58016019873 | ALPRAZOLAM | Alprazolam |
| 58016019889 | ALPRAZOLAM | Alprazolam |
| 58016019890 | ALPRAZOLAM | Alprazolam |
| 58016027300 | DIAZEPAM   | Diazepam   |
| 58016027302 | DIAZEPAM   | Diazepam   |
| 58016027303 | DIAZEPAM   | Diazepam   |
| 58016027306 | DIAZEPAM   | Diazepam   |
| 58016027309 | DIAZEPAM   | Diazepam   |
| 58016027310 | DIAZEPAM   | Diazepam   |
| 58016027312 | DIAZEPAM   | Diazepam   |
| 58016027315 | DIAZEPAM   | Diazepam   |
| 58016027320 | DIAZEPAM   | Diazepam   |
| 58016027330 | DIAZEPAM   | Diazepam   |
| 58016027340 | DIAZEPAM   | Diazepam   |
| 58016027360 | DIAZEPAM   | Diazepam   |
| 58016027373 | DIAZEPAM   | Diazepam   |
| 58016027389 | DIAZEPAM   | Diazepam   |
| 58016027390 | DIAZEPAM   | Diazepam   |
| 58016027400 | DIAZEPAM   | Diazepam   |
| 58016027412 | DIAZEPAM   | Diazepam   |
| 58016027420 | DIAZEPAM   | Diazepam   |
| 58016027430 | DIAZEPAM   | Diazepam   |
| 58016027500 | DIAZEPAM   | Diazepam   |
| 58016027502 | DIAZEPAM   | Diazepam   |
| 58016027503 | DIAZEPAM   | Diazepam   |
| 58016027504 | DIAZEPAM   | Diazepam   |
| 58016027506 | DIAZEPAM   | Diazepam   |
| 58016027508 | DIAZEPAM   | Diazepam   |
| 58016027509 | DIAZEPAM   | Diazepam   |
| 58016027510 | DIAZEPAM   | Diazepam   |
| 58016027512 | DIAZEPAM   | Diazepam   |
| 58016027514 | DIAZEPAM   | Diazepam   |
| 58016027515 | DIAZEPAM   | Diazepam   |
| 58016027516 | DIAZEPAM   | Diazepam   |
| 58016027518 | DIAZEPAM   | Diazepam   |
| 58016027520 | DIAZEPAM   | Diazepam   |

|             |            |            |
|-------------|------------|------------|
| 58016027521 | DIAZEPAM   | Diazepam   |
| 58016027524 | DIAZEPAM   | Diazepam   |
| 58016027528 | DIAZEPAM   | Diazepam   |
| 58016027530 | DIAZEPAM   | Diazepam   |
| 58016027536 | DIAZEPAM   | Diazepam   |
| 58016027540 | DIAZEPAM   | Diazepam   |
| 58016027550 | DIAZEPAM   | Diazepam   |
| 58016027560 | DIAZEPAM   | Diazepam   |
| 58016027573 | DIAZEPAM   | Diazepam   |
| 58016027589 | DIAZEPAM   | Diazepam   |
| 58016027590 | DIAZEPAM   | Diazepam   |
| 58016030020 | VALIUM     | Diazepam   |
| 58016033812 | TRIAZOLAM  | Triazolam  |
| 58016033815 | TRIAZOLAM  | Triazolam  |
| 58016033820 | TRIAZOLAM  | Triazolam  |
| 58016033830 | TRIAZOLAM  | Triazolam  |
| 58016037900 | ALPRAZOLAM | Alprazolam |
| 58016037902 | ALPRAZOLAM | Alprazolam |
| 58016037903 | ALPRAZOLAM | Alprazolam |
| 58016037910 | ALPRAZOLAM | Alprazolam |
| 58016037912 | ALPRAZOLAM | Alprazolam |
| 58016037914 | ALPRAZOLAM | Alprazolam |
| 58016037915 | ALPRAZOLAM | Alprazolam |
| 58016037920 | ALPRAZOLAM | Alprazolam |
| 58016037921 | ALPRAZOLAM | Alprazolam |
| 58016037924 | ALPRAZOLAM | Alprazolam |
| 58016037925 | ALPRAZOLAM | Alprazolam |
| 58016037928 | ALPRAZOLAM | Alprazolam |
| 58016037930 | ALPRAZOLAM | Alprazolam |
| 58016037940 | ALPRAZOLAM | Alprazolam |
| 58016037960 | ALPRAZOLAM | Alprazolam |
| 58016037973 | ALPRAZOLAM | Alprazolam |
| 58016037989 | ALPRAZOLAM | Alprazolam |
| 58016037990 | ALPRAZOLAM | Alprazolam |
| 58016051500 | TEMAZEPAM  | Temazepam  |
| 58016051512 | TEMAZEPAM  | Temazepam  |
| 58016051515 | TEMAZEPAM  | Temazepam  |
| 58016051520 | TEMAZEPAM  | Temazepam  |
| 58016051530 | TEMAZEPAM  | Temazepam  |
| 58016051560 | TEMAZEPAM  | Temazepam  |
| 58016075700 | TRIAZOLAM  | Triazolam  |
| 58016075702 | TRIAZOLAM  | Triazolam  |
| 58016075703 | TRIAZOLAM  | Triazolam  |

|             |                |               |
|-------------|----------------|---------------|
| 58016075705 | TRIAZOLAM      | Triazolam     |
| 58016075710 | TRIAZOLAM      | Triazolam     |
| 58016075712 | TRIAZOLAM      | Triazolam     |
| 58016075715 | TRIAZOLAM      | Triazolam     |
| 58016075720 | TRIAZOLAM      | Triazolam     |
| 58016075730 | TRIAZOLAM      | Triazolam     |
| 58016075760 | TRIAZOLAM      | Triazolam     |
| 58016075773 | TRIAZOLAM      | Triazolam     |
| 58016075789 | TRIAZOLAM      | Triazolam     |
| 58016075790 | TRIAZOLAM      | Triazolam     |
| 58016079100 | ESTAZOLAM      | Estazolam     |
| 58016079130 | ESTAZOLAM      | Estazolam     |
| 58016079160 | ESTAZOLAM      | Estazolam     |
| 58016079190 | ESTAZOLAM      | Estazolam     |
| 58016080300 | LORAZEPAM      | Lorazepam     |
| 58016080302 | LORAZEPAM      | Lorazepam     |
| 58016080303 | LORAZEPAM      | Lorazepam     |
| 58016080305 | LORAZEPAM      | Lorazepam     |
| 58016080312 | LORAZEPAM      | Lorazepam     |
| 58016080315 | LORAZEPAM      | Lorazepam     |
| 58016080320 | LORAZEPAM      | Lorazepam     |
| 58016080330 | LORAZEPAM      | Lorazepam     |
| 58016080360 | LORAZEPAM      | Lorazepam     |
| 58016080373 | LORAZEPAM      | Lorazepam     |
| 58016080389 | LORAZEPAM      | Lorazepam     |
| 58016080390 | LORAZEPAM      | Lorazepam     |
| 58016080400 | LORAZEPAM      | Lorazepam     |
| 58016080402 | LORAZEPAM      | Lorazepam     |
| 58016080403 | LORAZEPAM      | Lorazepam     |
| 58016080412 | LORAZEPAM      | Lorazepam     |
| 58016080415 | LORAZEPAM      | Lorazepam     |
| 58016080420 | LORAZEPAM      | Lorazepam     |
| 58016080430 | LORAZEPAM      | Lorazepam     |
| 58016080473 | LORAZEPAM      | Lorazepam     |
| 58016080489 | LORAZEPAM      | Lorazepam     |
| 58016080500 | LORAZEPAM      | Lorazepam     |
| 58016080502 | LORAZEPAM      | Lorazepam     |
| 58016080530 | LORAZEPAM      | Lorazepam     |
| 58016080560 | LORAZEPAM      | Lorazepam     |
| 58016080590 | LORAZEPAM      | Lorazepam     |
|             |                | Flurazepam    |
| 58016081100 | FLURAZEPAM HCL | Hydrochloride |
| 58016081105 | FLURAZEPAM HCL | Flurazepam    |

|             |                |               |
|-------------|----------------|---------------|
|             |                | Hydrochloride |
|             |                | Flurazepam    |
| 58016081112 | FLURAZEPAM HCL | Hydrochloride |
|             |                | Flurazepam    |
| 58016081114 | FLURAZEPAM HCL | Hydrochloride |
|             |                | Flurazepam    |
| 58016081115 | FLURAZEPAM HCL | Hydrochloride |
|             |                | Flurazepam    |
| 58016081120 | FLURAZEPAM HCL | Hydrochloride |
|             |                | Flurazepam    |
| 58016081130 | FLURAZEPAM HCL | Hydrochloride |
|             |                | Flurazepam    |
| 58016081140 | FLURAZEPAM HCL | Hydrochloride |
|             |                | Flurazepam    |
| 58016081160 | FLURAZEPAM HCL | Hydrochloride |
|             |                | Flurazepam    |
| 58016081200 | FLURAZEPAM HCL | Hydrochloride |
|             |                | Flurazepam    |
| 58016081202 | FLURAZEPAM HCL | Hydrochloride |
|             |                | Flurazepam    |
| 58016081203 | FLURAZEPAM HCL | Hydrochloride |
|             |                | Flurazepam    |
| 58016081206 | FLURAZEPAM HCL | Hydrochloride |
|             |                | Flurazepam    |
| 58016081209 | FLURAZEPAM HCL | Hydrochloride |
|             |                | Flurazepam    |
| 58016081210 | FLURAZEPAM HCL | Hydrochloride |
|             |                | Flurazepam    |
| 58016081212 | FLURAZEPAM HCL | Hydrochloride |
|             |                | Flurazepam    |
| 58016081214 | FLURAZEPAM HCL | Hydrochloride |
|             |                | Flurazepam    |
| 58016081215 | FLURAZEPAM HCL | Hydrochloride |
|             |                | Flurazepam    |
| 58016081220 | FLURAZEPAM HCL | Hydrochloride |
|             |                | Flurazepam    |
| 58016081221 | FLURAZEPAM HCL | Hydrochloride |
|             |                | Flurazepam    |
| 58016081224 | FLURAZEPAM HCL | Hydrochloride |
|             |                | Flurazepam    |
| 58016081230 | FLURAZEPAM HCL | Hydrochloride |
|             |                | Flurazepam    |
| 58016081260 | FLURAZEPAM HCL | Hydrochloride |
|             |                | Flurazepam    |
| 58016081273 | FLURAZEPAM HCL | Hydrochloride |
|             |                | Flurazepam    |
| 58016081289 | FLURAZEPAM HCL | Hydrochloride |
| 58016081712 | TRIAZOLAM      | Triazolam     |

|             |                  |                  |
|-------------|------------------|------------------|
| 58016081715 | TRIAZOLAM        | Triazolam        |
| 58016081720 | TRIAZOLAM        | Triazolam        |
| 58016081805 | TRIAZOLAM        | Triazolam        |
| 58016081810 | HALCION          | Triazolam        |
| 58016081812 | TRIAZOLAM        | Triazolam        |
| 58016081814 | HALCION          | Triazolam        |
| 58016081815 | TRIAZOLAM        | Triazolam        |
| 58016081820 | TRIAZOLAM        | Triazolam        |
|             | CHLORDIAZEPOXIDE | Chlordiazepoxide |
| 58016082100 | HCL              | Hydrochloride    |
|             | CHLORDIAZEPOXIDE | Chlordiazepoxide |
| 58016082108 | HCL              | Hydrochloride    |
|             | CHLORDIAZEPOXIDE | Chlordiazepoxide |
| 58016082110 | HCL              | Hydrochloride    |
|             | CHLORDIAZEPOXIDE | Chlordiazepoxide |
| 58016082112 | HCL              | Hydrochloride    |
|             | CHLORDIAZEPOXIDE | Chlordiazepoxide |
| 58016082114 | HCL              | Hydrochloride    |
|             | CHLORDIAZEPOXIDE | Chlordiazepoxide |
| 58016082115 | HCL              | Hydrochloride    |
|             | CHLORDIAZEPOXIDE | Chlordiazepoxide |
| 58016082120 | HCL              | Hydrochloride    |
|             | CHLORDIAZEPOXIDE | Chlordiazepoxide |
| 58016082121 | HCL              | Hydrochloride    |
|             | CHLORDIAZEPOXIDE | Chlordiazepoxide |
| 58016082124 | HCL              | Hydrochloride    |
|             | CHLORDIAZEPOXIDE | Chlordiazepoxide |
| 58016082125 | HCL              | Hydrochloride    |
|             | CHLORDIAZEPOXIDE | Chlordiazepoxide |
| 58016082128 | HCL              | Hydrochloride    |
|             | CHLORDIAZEPOXIDE | Chlordiazepoxide |
| 58016082130 | HCL              | Hydrochloride    |
|             | CHLORDIAZEPOXIDE | Chlordiazepoxide |
| 58016082140 | HCL              | Hydrochloride    |
|             | CHLORDIAZEPOXIDE | Chlordiazepoxide |
| 58016082150 | HCL              | Hydrochloride    |
|             | CHLORDIAZEPOXIDE | Chlordiazepoxide |
| 58016082160 | HCL              | Hydrochloride    |
|             | CHLORDIAZEPOXIDE | Chlordiazepoxide |
| 58016082200 | HCL              | Hydrochloride    |
|             | CHLORDIAZEPOXIDE | Chlordiazepoxide |
| 58016082212 | HCL              | Hydrochloride    |
|             | CHLORDIAZEPOXIDE | Chlordiazepoxide |
| 58016082215 | HCL              | Hydrochloride    |
|             | CHLORDIAZEPOXIDE | Chlordiazepoxide |
| 58016082220 | HCL              | Hydrochloride    |
| 58016082230 | CHLORDIAZEPOXIDE | Chlordiazepoxide |

|             | HCL        | Hydrochloride |
|-------------|------------|---------------|
| 58016082900 | TEMAZEPAM  | Temazepam     |
| 58016082902 | TEMAZEPAM  | Temazepam     |
| 58016082903 | TEMAZEPAM  | Temazepam     |
| 58016082912 | TEMAZEPAM  | Temazepam     |
| 58016082915 | TEMAZEPAM  | Temazepam     |
| 58016082920 | TEMAZEPAM  | Temazepam     |
| 58016082930 | TEMAZEPAM  | Temazepam     |
| 58016082960 | TEMAZEPAM  | Temazepam     |
| 58016082973 | TEMAZEPAM  | Temazepam     |
| 58016082989 | TEMAZEPAM  | Temazepam     |
| 58016082990 | TEMAZEPAM  | Temazepam     |
| 58016083100 | TEMAZEPAM  | Temazepam     |
| 58016083102 | TEMAZEPAM  | Temazepam     |
| 58016083103 | TEMAZEPAM  | Temazepam     |
| 58016083112 | TEMAZEPAM  | Temazepam     |
| 58016083115 | TEMAZEPAM  | Temazepam     |
| 58016083120 | TEMAZEPAM  | Temazepam     |
| 58016083128 | TEMAZEPAM  | Temazepam     |
| 58016083130 | TEMAZEPAM  | Temazepam     |
| 58016083145 | TEMAZEPAM  | Temazepam     |
| 58016083160 | TEMAZEPAM  | Temazepam     |
| 58016083173 | TEMAZEPAM  | Temazepam     |
| 58016083189 | TEMAZEPAM  | Temazepam     |
| 58016083190 | TEMAZEPAM  | Temazepam     |
| 58016084000 | ALPRAZOLAM | Alprazolam    |
| 58016084002 | ALPRAZOLAM | Alprazolam    |
| 58016084003 | ALPRAZOLAM | Alprazolam    |
| 58016084010 | ALPRAZOLAM | Alprazolam    |
| 58016084012 | ALPRAZOLAM | Alprazolam    |
| 58016084014 | ALPRAZOLAM | Alprazolam    |
| 58016084015 | ALPRAZOLAM | Alprazolam    |
| 58016084018 | ALPRAZOLAM | Alprazolam    |
| 58016084020 | ALPRAZOLAM | Alprazolam    |
| 58016084021 | ALPRAZOLAM | Alprazolam    |
| 58016084024 | ALPRAZOLAM | Alprazolam    |
| 58016084025 | ALPRAZOLAM | Alprazolam    |
| 58016084028 | ALPRAZOLAM | Alprazolam    |
| 58016084030 | ALPRAZOLAM | Alprazolam    |
| 58016084040 | ALPRAZOLAM | Alprazolam    |
| 58016084060 | ALPRAZOLAM | Alprazolam    |
| 58016084073 | ALPRAZOLAM | Alprazolam    |
| 58016084089 | ALPRAZOLAM | Alprazolam    |

|             |                  |                  |
|-------------|------------------|------------------|
| 58016084090 | ALPRAZOLAM       | Alprazolam       |
|             | CLORAZEPATE      | Clorazepate      |
| 58016084330 | DIPOTASSIUM      | Dipotassium      |
|             | CLORAZEPATE      | Clorazepate      |
| 58016084420 | DIPOTASSIUM      | Dipotassium      |
| 58016084620 | XANAX            | Alprazolam       |
| 58016084709 | XANAX            | Alprazolam       |
| 58016084710 | XANAX            | Alprazolam       |
| 58016084715 | XANAX            | Alprazolam       |
| 58016084720 | XANAX            | Alprazolam       |
| 58016084730 | XANAX            | Alprazolam       |
| 58016084760 | XANAX            | Alprazolam       |
|             |                  | Chlordiazepoxide |
| 58016099600 | LIBRIUM          | Hydrochloride    |
|             |                  | Chlordiazepoxide |
| 58016099630 | LIBRIUM          | Hydrochloride    |
|             |                  | Chlordiazepoxide |
| 58016099660 | LIBRIUM          | Hydrochloride    |
|             |                  | Chlordiazepoxide |
| 58016099690 | LIBRIUM          | Hydrochloride    |
| 58345080365 | DIAZEPAM         | Diazepam         |
| 58345080465 | DIAZEPAM         | Diazepam         |
|             | CHLORDIAZEPOXIDE | Chlordiazepoxide |
| 58469034883 | HCL              | Hydrochloride    |
|             | CHLORDIAZEPOXIDE | Chlordiazepoxide |
| 58469034893 | HCL              | Hydrochloride    |
| 58469039593 | LORAZEPAM        | Lorazepam        |
| 58469039603 | LORAZEPAM        | Lorazepam        |
| 58469039613 | LORAZEPAM        | Lorazepam        |
| 58469048763 | OXAZEPAM         | Oxazepam         |
| 58469048773 | OXAZEPAM         | Oxazepam         |
| 58469048783 | OXAZEPAM         | Oxazepam         |
|             | CHLORDIAZEPOXIDE | Chlordiazepoxide |
| 58469348830 | HCL              | Hydrochloride    |
|             | CHLORDIAZEPOXIDE | Chlordiazepoxide |
| 58469348930 | HCL              | Hydrochloride    |
| 58469395930 | LORAZEPAM        | Lorazepam        |
| 58469396030 | LORAZEPAM        | Lorazepam        |
| 58469396130 | LORAZEPAM        | Lorazepam        |
| 58469487630 | OXAZEPAM         | Oxazepam         |
| 58469487730 | OXAZEPAM         | Oxazepam         |
| 58469487830 | OXAZEPAM         | Oxazepam         |
|             | CHLORDIAZEPOXIDE | Chlordiazepoxide |
| 58864008030 | HCL              | Hydrochloride    |
| 58864008130 | CHLORDIAZEPOXIDE | Chlordiazepoxide |

|             |                   |                    |
|-------------|-------------------|--------------------|
|             | HCL               | Hydrochloride      |
| 58864014430 | DIAZEPAM          | Diazepam           |
| 58864014520 | DIAZEPAM          | Diazepam           |
| 58864014530 | DIAZEPAM          | Diazepam           |
| 58864014560 | DIAZEPAM          | Diazepam           |
| 58864014590 | DIAZEPAM          | Diazepam           |
| 58864014630 | DIAZEPAM          | Diazepam           |
|             |                   | Flurazepam         |
| 58864021330 | FLURAZEPAM HCL    | Hydrochloride      |
| 58864048830 | TEMAZEPAM         | Temazepam          |
| 58864048930 | TEMAZEPAM         | Temazepam          |
| 58864070115 | LORAZEPAM         | Lorazepam          |
| 59075065020 | DIASTAT PEDIATRIC | Diazepam;lubricant |
| 59075065120 | DIASTAT PEDIATRIC | Diazepam;lubricant |
| 59075065220 | DIASTAT UNIVERSAL | Diazepam           |
| 59075065320 | DIASTAT           | Diazepam;lubricant |
| 59075065420 | DIASTAT           | Diazepam;lubricant |
| 59075065520 | DIASTAT           | Diazepam           |
| 59441063510 | ZETRAN            | Diazepam           |
| 59547031019 | DORAL             | Quazepam           |
| 59591005168 | ALPRAZOLAM        | Alprazolam         |
| 59591005268 | ALPRAZOLAM        | Alprazolam         |
| 59591005368 | ALPRAZOLAM        | Alprazolam         |
| 59591005468 | ALPRAZOLAM        | Alprazolam         |
| 59762005701 | ALPRAZOLAM XR     | Alprazolam         |
| 59762005901 | ALPRAZOLAM XR     | Alprazolam         |
| 59762006601 | ALPRAZOLAM XR     | Alprazolam         |
| 59762006801 | ALPRAZOLAM XR     | Alprazolam         |
| 59762371701 | TRIAZOLAM         | Triazolam          |
| 59762371703 | TRIAZOLAM         | Triazolam          |
| 59762371704 | TRIAZOLAM         | Triazolam          |
| 59762371801 | TRIAZOLAM         | Triazolam          |
| 59762371803 | TRIAZOLAM         | Triazolam          |
| 59762371804 | TRIAZOLAM         | Triazolam          |
| 59762371901 | ALPRAZOLAM        | Alprazolam         |
| 59762371903 | ALPRAZOLAM        | Alprazolam         |
| 59762371904 | ALPRAZOLAM        | Alprazolam         |
| 59762372001 | ALPRAZOLAM        | Alprazolam         |
| 59762372003 | ALPRAZOLAM        | Alprazolam         |
| 59762372004 | ALPRAZOLAM        | Alprazolam         |
| 59762372101 | ALPRAZOLAM        | Alprazolam         |
| 59762372103 | ALPRAZOLAM        | Alprazolam         |
| 59762372104 | ALPRAZOLAM        | Alprazolam         |

|             |                         |                                   |
|-------------|-------------------------|-----------------------------------|
| 59762372201 | ALPRAZOLAM              | Alprazolam                        |
| 59762372203 | ALPRAZOLAM              | Alprazolam                        |
| 59911581101 | LORAZEPAM               | Lorazepam                         |
| 59911581102 | LORAZEPAM               | Lorazepam                         |
| 59911581201 | LORAZEPAM               | Lorazepam                         |
| 59911581202 | LORAZEPAM               | Lorazepam                         |
| 59911581301 | LORAZEPAM               | Lorazepam                         |
| 59911587601 | OXAZEPAM                | Oxazepam                          |
| 59911587701 | OXAZEPAM                | Oxazepam                          |
| 59911587801 | OXAZEPAM                | Oxazepam                          |
| 59911591102 | MIDAZOLAM HCL           | Midazolam<br>Hydrochloride        |
| 59911591202 | MIDAZOLAM HCL           | Midazolam<br>Hydrochloride        |
| 59911591302 | MIDAZOLAM HCL           | Midazolam<br>Hydrochloride        |
| 59911591402 | MIDAZOLAM HCL           | Midazolam<br>Hydrochloride        |
| 59911591502 | MIDAZOLAM HCL           | Midazolam<br>Hydrochloride        |
| 59911591602 | MIDAZOLAM HCL           | Midazolam<br>Hydrochloride        |
| 60104401102 | CHLORDIAZEPOXIDE<br>HCL | Chlordiazepoxide<br>Hydrochloride |
| 60104401106 | CHLORDIAZEPOXIDE<br>HCL | Chlordiazepoxide<br>Hydrochloride |
| 60104401108 | CHLORDIAZEPOXIDE<br>HCL | Chlordiazepoxide<br>Hydrochloride |
| 60104401202 | CHLORDIAZEPOXIDE<br>HCL | Chlordiazepoxide<br>Hydrochloride |
| 60104401206 | CHLORDIAZEPOXIDE<br>HCL | Chlordiazepoxide<br>Hydrochloride |
| 60104401208 | CHLORDIAZEPOXIDE<br>HCL | Chlordiazepoxide<br>Hydrochloride |
| 60104600702 | DIAZEPAM                | Diazepam                          |
| 60104600706 | DIAZEPAM                | Diazepam                          |
| 60104600708 | DIAZEPAM                | Diazepam                          |
| 60104600802 | DIAZEPAM                | Diazepam                          |
| 60104600806 | DIAZEPAM                | Diazepam                          |
| 60104600808 | DIAZEPAM                | Diazepam                          |
| 60104600902 | DIAZEPAM                | Diazepam                          |
| 60104600906 | DIAZEPAM                | Diazepam                          |
| 60104600908 | DIAZEPAM                | Diazepam                          |
| 60346000510 | TEMAZEPAM               | Temazepam                         |
| 60346000512 | TEMAZEPAM               | Temazepam                         |

|             |                  |                  |
|-------------|------------------|------------------|
| 60346000530 | TEMAZEPAM        | Temazepam        |
| 60346003302 | DIAZEPAM         | Diazepam         |
| 60346003306 | DIAZEPAM         | Diazepam         |
| 60346003310 | DIAZEPAM         | Diazepam         |
| 60346003315 | DIAZEPAM         | Diazepam         |
| 60346003320 | DIAZEPAM         | Diazepam         |
| 60346003330 | DIAZEPAM         | Diazepam         |
| 60346003360 | DIAZEPAM         | Diazepam         |
| 60346003390 | DIAZEPAM         | Diazepam         |
| 60346003394 | DIAZEPAM         | Diazepam         |
| 60346003398 | DIAZEPAM         | Diazepam         |
| 60346004706 | LORAZEPAM        | Lorazepam        |
| 60346004708 | LORAZEPAM        | Lorazepam        |
| 60346004720 | LORAZEPAM        | Lorazepam        |
| 60346004725 | LORAZEPAM        | Lorazepam        |
| 60346004730 | LORAZEPAM        | Lorazepam        |
| 60346004744 | LORAZEPAM        | Lorazepam        |
| 60346004760 | LORAZEPAM        | Lorazepam        |
| 60346004790 | LORAZEPAM        | Lorazepam        |
| 60346004794 | LORAZEPAM        | Lorazepam        |
| 60346005110 | XANAX            | Alprazolam       |
| 60346005120 | XANAX            | Alprazolam       |
| 60346005130 | XANAX            | Alprazolam       |
| 60346005160 | XANAX            | Alprazolam       |
|             | CHLORDIAZEPOXIDE | Chlordiazepoxide |
| 60346005206 | HCL              | Hydrochloride    |
|             | CHLORDIAZEPOXIDE | Chlordiazepoxide |
| 60346005225 | HCL              | Hydrochloride    |
|             | CHLORDIAZEPOXIDE | Chlordiazepoxide |
| 60346005230 | HCL              | Hydrochloride    |
|             | CHLORDIAZEPOXIDE | Chlordiazepoxide |
| 60346005290 | HCL              | Hydrochloride    |
| 60346007510 | XANAX            | Alprazolam       |
| 60346007530 | XANAX            | Alprazolam       |
|             |                  | Flurazepam       |
| 60346023930 | FLURAZEPAM HCL   | Hydrochloride    |
|             | CHLORDIAZEPOXIDE | Chlordiazepoxide |
| 60346026000 | HCL              | Hydrochloride    |
|             | CHLORDIAZEPOXIDE | Chlordiazepoxide |
| 60346026008 | HCL              | Hydrochloride    |
|             | CHLORDIAZEPOXIDE | Chlordiazepoxide |
| 60346026012 | HCL              | Hydrochloride    |
|             | CHLORDIAZEPOXIDE | Chlordiazepoxide |
| 60346026025 | HCL              | Hydrochloride    |
| 60346026030 | CHLORDIAZEPOXIDE | Chlordiazepoxide |

|             |                |               |
|-------------|----------------|---------------|
|             | HCL            | Hydrochloride |
| 60346036310 | LORAZEPAM      | Lorazepam     |
| 60346036325 | LORAZEPAM      | Lorazepam     |
| 60346036330 | LORAZEPAM      | Lorazepam     |
| 60346036360 | LORAZEPAM      | Lorazepam     |
| 60346036390 | LORAZEPAM      | Lorazepam     |
| 60346036394 | LORAZEPAM      | Lorazepam     |
|             | CLORAZEPATE    | Clorazepate   |
| 60346040960 | DIPOTASSIUM    | Dipotassium   |
| 60346043906 | VALIUM         | Diazepam      |
| 60346043912 | VALIUM         | Diazepam      |
| 60346047806 | DIAZEPAM       | Diazepam      |
| 60346047810 | DIAZEPAM       | Diazepam      |
| 60346047815 | DIAZEPAM       | Diazepam      |
| 60346047820 | DIAZEPAM       | Diazepam      |
| 60346047825 | DIAZEPAM       | Diazepam      |
| 60346047830 | DIAZEPAM       | Diazepam      |
| 60346047844 | DIAZEPAM       | Diazepam      |
| 60346047860 | DIAZEPAM       | Diazepam      |
| 60346047890 | DIAZEPAM       | Diazepam      |
| 60346047894 | DIAZEPAM       | Diazepam      |
|             | CLORAZEPATE    | Clorazepate   |
| 60346054905 | DIPOTASSIUM    | Dipotassium   |
| 60346056710 | XANAX          | Alprazolam    |
| 60346056715 | XANAX          | Alprazolam    |
| 60346056720 | XANAX          | Alprazolam    |
| 60346056730 | XANAX          | Alprazolam    |
| 60346056790 | XANAX          | Alprazolam    |
| 60346057912 | DIAZEPAM       | Diazepam      |
| 60346057920 | DIAZEPAM       | Diazepam      |
| 60346057930 | DIAZEPAM       | Diazepam      |
| 60346057994 | DIAZEPAM       | Diazepam      |
| 60346058830 | HALCION        | Triazolam     |
| 60346066825 | TEMAZEPAM      | Temazepam     |
| 60346066830 | TEMAZEPAM      | Temazepam     |
|             |                | Flurazepam    |
| 60346076203 | FLURAZEPAM HCL | Hydrochloride |
|             |                | Flurazepam    |
| 60346076206 | FLURAZEPAM HCL | Hydrochloride |
|             |                | Flurazepam    |
| 60346076212 | FLURAZEPAM HCL | Hydrochloride |
|             |                | Flurazepam    |
| 60346076230 | FLURAZEPAM HCL | Hydrochloride |
| 60346077920 | PROSOM         | Estazolam     |

|             |                  |                  |
|-------------|------------------|------------------|
| 60346080010 | LORAZEPAM        | Lorazepam        |
| 60346080030 | LORAZEPAM        | Lorazepam        |
| 60346080060 | LORAZEPAM        | Lorazepam        |
|             | CHLORDIAZEPOXIDE | Chlordiazepoxide |
| 60346083808 | HCL              | Hydrochloride    |
| 60346086103 | ALPRAZOLAM       | Alprazolam       |
| 60346086106 | ALPRAZOLAM       | Alprazolam       |
| 60346086114 | ALPRAZOLAM       | Alprazolam       |
| 60346086120 | ALPRAZOLAM       | Alprazolam       |
| 60346086130 | ALPRAZOLAM       | Alprazolam       |
| 60346086144 | ALPRAZOLAM       | Alprazolam       |
| 60346086160 | ALPRAZOLAM       | Alprazolam       |
| 60346086190 | ALPRAZOLAM       | Alprazolam       |
| 60346086530 | DORAL            | Quazepam         |
|             | CLORAZEPATE      | Clorazepate      |
| 60346086690 | DIPOTASSIUM      | Dipotassium      |
| 60346087610 | ALPRAZOLAM       | Alprazolam       |
| 60346087620 | ALPRAZOLAM       | Alprazolam       |
| 60346087630 | ALPRAZOLAM       | Alprazolam       |
| 60346087690 | ALPRAZOLAM       | Alprazolam       |
| 60346088610 | TRIAZOLAM        | Triazolam        |
| 60346088630 | TRIAZOLAM        | Triazolam        |
| 60346093210 | ALPRAZOLAM       | Alprazolam       |
| 60346093230 | ALPRAZOLAM       | Alprazolam       |
| 60429050212 | ALPRAZOLAM       | Alprazolam       |
| 60429050215 | ALPRAZOLAM       | Alprazolam       |
| 60429050218 | ALPRAZOLAM       | Alprazolam       |
| 60429050230 | ALPRAZOLAM       | Alprazolam       |
| 60429050260 | ALPRAZOLAM       | Alprazolam       |
| 60429050290 | ALPRAZOLAM       | Alprazolam       |
| 60429050312 | ALPRAZOLAM       | Alprazolam       |
| 60429050315 | ALPRAZOLAM       | Alprazolam       |
| 60429050318 | ALPRAZOLAM       | Alprazolam       |
| 60429050330 | ALPRAZOLAM       | Alprazolam       |
| 60429050345 | ALPRAZOLAM       | Alprazolam       |
| 60429050360 | ALPRAZOLAM       | Alprazolam       |
| 60429050390 | ALPRAZOLAM       | Alprazolam       |
| 60429050412 | ALPRAZOLAM       | Alprazolam       |
| 60429050415 | ALPRAZOLAM       | Alprazolam       |
| 60429050418 | ALPRAZOLAM       | Alprazolam       |
| 60429050430 | ALPRAZOLAM       | Alprazolam       |
| 60429050460 | ALPRAZOLAM       | Alprazolam       |
| 60429050490 | ALPRAZOLAM       | Alprazolam       |

|             |                         |                                   |
|-------------|-------------------------|-----------------------------------|
| 60429050515 | ALPRAZOLAM              | Alprazolam                        |
| 60429050518 | ALPRAZOLAM              | Alprazolam                        |
| 60429050560 | ALPRAZOLAM              | Alprazolam                        |
| 60429050590 | ALPRAZOLAM              | Alprazolam                        |
| 60429050601 | TEMAZEPAM               | Temazepam                         |
| 60429050605 | TEMAZEPAM               | Temazepam                         |
| 60429050701 | TEMAZEPAM               | Temazepam                         |
| 60429050705 | TEMAZEPAM               | Temazepam                         |
| 60429051230 | LORAZEPAM               | Lorazepam                         |
| 60429051260 | LORAZEPAM               | Lorazepam                         |
| 60429051290 | LORAZEPAM               | Lorazepam                         |
| 60429051360 | LORAZEPAM               | Lorazepam                         |
| 60429054201 | FLURAZEPAM HCL          | Flurazepam<br>Hydrochloride       |
| 60429054205 | FLURAZEPAM HCL          | Flurazepam<br>Hydrochloride       |
| 60429054301 | FLURAZEPAM HCL          | Flurazepam<br>Hydrochloride       |
| 60429054305 | FLURAZEPAM HCL          | Flurazepam<br>Hydrochloride       |
| 60429055401 | CHLORDIAZEPOXIDE<br>HCL | Chlordiazepoxide<br>Hydrochloride |
| 60429055501 | CHLORDIAZEPOXIDE<br>HCL | Chlordiazepoxide<br>Hydrochloride |
| 60429055601 | CHLORDIAZEPOXIDE<br>HCL | Chlordiazepoxide<br>Hydrochloride |
| 60429056601 | ESTAZOLAM               | Estazolam                         |
| 60429056701 | ESTAZOLAM               | Estazolam                         |
| 60505071101 | MIDAZOLAM HCL           | Midazolam<br>Hydrochloride        |
| 60505071102 | MIDAZOLAM HCL           | Midazolam<br>Hydrochloride        |
| 60505071103 | MIDAZOLAM HCL           | Midazolam<br>Hydrochloride        |
| 60505071201 | MIDAZOLAM HCL           | Midazolam<br>Hydrochloride        |
| 60505071202 | MIDAZOLAM HCL           | Midazolam<br>Hydrochloride        |
| 60505071203 | MIDAZOLAM HCL           | Midazolam<br>Hydrochloride        |
| 60505071204 | MIDAZOLAM HCL           | Midazolam<br>Hydrochloride        |
| 60687015311 | ALPRAZOLAM              | Alprazolam                        |
| 60687015321 | ALPRAZOLAM              | Alprazolam                        |
| 60760020630 | TEMAZEPAM               | Temazepam                         |
| 60760020730 | TEMAZEPAM               | Temazepam                         |

|             |            |            |
|-------------|------------|------------|
| 60760045430 | TRIAZOLAM  | Triazolam  |
| 60760045710 | LORAZEPAM  | Lorazepam  |
| 60760045715 | LORAZEPAM  | Lorazepam  |
| 60760045730 | LORAZEPAM  | Lorazepam  |
| 60760077510 | DIAZEPAM   | Diazepam   |
| 60760077530 | DIAZEPAM   | Diazepam   |
| 60760077630 | DIAZEPAM   | Diazepam   |
| 60760080960 | ALPRAZOLAM | Alprazolam |
| 60760081330 | ALPRAZOLAM | Alprazolam |
| 60809050255 | ALPRAZOLAM | Alprazolam |
| 60809050272 | ALPRAZOLAM | Alprazolam |
| 60809050455 | LORAZEPAM  | Lorazepam  |
| 60809050472 | LORAZEPAM  | Lorazepam  |
| 60809050555 | LORAZEPAM  | Lorazepam  |
| 60809050572 | LORAZEPAM  | Lorazepam  |
| 60809050855 | TEMAZEPAM  | Temazepam  |
| 60809050866 | TEMAZEPAM  | Temazepam  |
| 60809050872 | TEMAZEPAM  | Temazepam  |
| 60809050888 | TEMAZEPAM  | Temazepam  |
| 60809050955 | TEMAZEPAM  | Temazepam  |
| 60809050966 | TEMAZEPAM  | Temazepam  |
| 60809050972 | TEMAZEPAM  | Temazepam  |
| 60809050988 | TEMAZEPAM  | Temazepam  |
| 60809051055 | DIAZEPAM   | Diazepam   |
| 60809051072 | DIAZEPAM   | Diazepam   |
| 60809051155 | DIAZEPAM   | Diazepam   |
| 60809051172 | DIAZEPAM   | Diazepam   |
| 60809051455 | TEMAZEPAM  | Temazepam  |
| 60809051472 | TEMAZEPAM  | Temazepam  |
| 60977011201 | ATIVAN     | Lorazepam  |
| 60977011202 | ATIVAN     | Lorazepam  |
| 60977011271 | ATIVAN     | Lorazepam  |
| 60977011281 | ATIVAN     | Lorazepam  |
| 60977011301 | ATIVAN     | Lorazepam  |
| 60977011302 | ATIVAN     | Lorazepam  |
| 60977011371 | ATIVAN     | Lorazepam  |
| 60977011381 | ATIVAN     | Lorazepam  |
| 60997011601 | ATIVAN     | Lorazepam  |
| 60997011602 | ATIVAN     | Lorazepam  |
| 61392003430 | ALPRAZOLAM | Alprazolam |
| 61392003431 | ALPRAZOLAM | Alprazolam |
| 61392003432 | ALPRAZOLAM | Alprazolam |
| 61392003439 | ALPRAZOLAM | Alprazolam |

|             |            |            |
|-------------|------------|------------|
| 61392003445 | ALPRAZOLAM | Alprazolam |
| 61392003451 | ALPRAZOLAM | Alprazolam |
| 61392003454 | ALPRAZOLAM | Alprazolam |
| 61392003456 | ALPRAZOLAM | Alprazolam |
| 61392003460 | ALPRAZOLAM | Alprazolam |
| 61392003490 | ALPRAZOLAM | Alprazolam |
| 61392003491 | ALPRAZOLAM | Alprazolam |
| 61392003530 | ALPRAZOLAM | Alprazolam |
| 61392003531 | ALPRAZOLAM | Alprazolam |
| 61392003532 | ALPRAZOLAM | Alprazolam |
| 61392003539 | ALPRAZOLAM | Alprazolam |
| 61392003545 | ALPRAZOLAM | Alprazolam |
| 61392003551 | ALPRAZOLAM | Alprazolam |
| 61392003554 | ALPRAZOLAM | Alprazolam |
| 61392003556 | ALPRAZOLAM | Alprazolam |
| 61392003560 | ALPRAZOLAM | Alprazolam |
| 61392003590 | ALPRAZOLAM | Alprazolam |
| 61392003591 | ALPRAZOLAM | Alprazolam |
| 61392003630 | ALPRAZOLAM | Alprazolam |
| 61392003631 | ALPRAZOLAM | Alprazolam |
| 61392003632 | ALPRAZOLAM | Alprazolam |
| 61392003639 | ALPRAZOLAM | Alprazolam |
| 61392003645 | ALPRAZOLAM | Alprazolam |
| 61392003651 | ALPRAZOLAM | Alprazolam |
| 61392003654 | ALPRAZOLAM | Alprazolam |
| 61392003656 | ALPRAZOLAM | Alprazolam |
| 61392003660 | ALPRAZOLAM | Alprazolam |
| 61392003690 | ALPRAZOLAM | Alprazolam |
| 61392003691 | ALPRAZOLAM | Alprazolam |
| 61392003730 | ALPRAZOLAM | Alprazolam |
| 61392003731 | ALPRAZOLAM | Alprazolam |
| 61392003732 | ALPRAZOLAM | Alprazolam |
| 61392003739 | ALPRAZOLAM | Alprazolam |
| 61392003745 | ALPRAZOLAM | Alprazolam |
| 61392003751 | ALPRAZOLAM | Alprazolam |
| 61392003754 | ALPRAZOLAM | Alprazolam |
| 61392003756 | ALPRAZOLAM | Alprazolam |
| 61392003760 | ALPRAZOLAM | Alprazolam |
| 61392003790 | ALPRAZOLAM | Alprazolam |
| 61392003791 | ALPRAZOLAM | Alprazolam |
| 61392014830 | TEMAZEPAM  | Temazepam  |
| 61392014831 | TEMAZEPAM  | Temazepam  |
| 61392014832 | TEMAZEPAM  | Temazepam  |

|             |                |                             |
|-------------|----------------|-----------------------------|
| 61392014839 | TEMAZEPAM      | Temazepam                   |
| 61392014845 | TEMAZEPAM      | Temazepam                   |
| 61392014851 | TEMAZEPAM      | Temazepam                   |
| 61392014854 | TEMAZEPAM      | Temazepam                   |
| 61392014860 | TEMAZEPAM      | Temazepam                   |
| 61392014890 | TEMAZEPAM      | Temazepam                   |
| 61392014891 | TEMAZEPAM      | Temazepam                   |
| 61392014930 | TEMAZEPAM      | Temazepam                   |
| 61392014931 | TEMAZEPAM      | Temazepam                   |
| 61392014932 | TEMAZEPAM      | Temazepam                   |
| 61392014939 | TEMAZEPAM      | Temazepam                   |
| 61392014945 | TEMAZEPAM      | Temazepam                   |
| 61392014951 | TEMAZEPAM      | Temazepam                   |
| 61392014954 | TEMAZEPAM      | Temazepam                   |
| 61392014960 | TEMAZEPAM      | Temazepam                   |
| 61392014990 | TEMAZEPAM      | Temazepam                   |
| 61392014991 | TEMAZEPAM      | Temazepam                   |
| 61392015030 | TRIAZOLAM      | Triazolam                   |
| 61392015031 | TRIAZOLAM      | Triazolam                   |
| 61392015032 | TRIAZOLAM      | Triazolam                   |
| 61392015039 | TRIAZOLAM      | Triazolam                   |
| 61392015045 | TRIAZOLAM      | Triazolam                   |
| 61392015051 | TRIAZOLAM      | Triazolam                   |
| 61392015054 | TRIAZOLAM      | Triazolam                   |
| 61392015060 | TRIAZOLAM      | Triazolam                   |
| 61392015090 | TRIAZOLAM      | Triazolam                   |
| 61392015091 | TRIAZOLAM      | Triazolam                   |
| 61392023830 | FLURAZEPAM HCL | Flurazepam<br>Hydrochloride |
| 61392023831 | FLURAZEPAM HCL | Flurazepam<br>Hydrochloride |
| 61392023832 | FLURAZEPAM HCL | Flurazepam<br>Hydrochloride |
| 61392023839 | FLURAZEPAM HCL | Flurazepam<br>Hydrochloride |
| 61392023845 | FLURAZEPAM HCL | Flurazepam<br>Hydrochloride |
| 61392023851 | FLURAZEPAM HCL | Flurazepam<br>Hydrochloride |
| 61392023854 | FLURAZEPAM HCL | Flurazepam<br>Hydrochloride |
| 61392023856 | FLURAZEPAM HCL | Flurazepam<br>Hydrochloride |
| 61392023860 | FLURAZEPAM HCL | Flurazepam<br>Hydrochloride |

|             |                |                             |
|-------------|----------------|-----------------------------|
| 61392023890 | FLURAZEPAM HCL | Flurazepam<br>Hydrochloride |
| 61392023891 | FLURAZEPAM HCL | Flurazepam<br>Hydrochloride |
| 61392024130 | FLURAZEPAM HCL | Flurazepam<br>Hydrochloride |
| 61392024131 | FLURAZEPAM HCL | Flurazepam<br>Hydrochloride |
| 61392024132 | FLURAZEPAM HCL | Flurazepam<br>Hydrochloride |
| 61392024139 | FLURAZEPAM HCL | Flurazepam<br>Hydrochloride |
| 61392024145 | FLURAZEPAM HCL | Flurazepam<br>Hydrochloride |
| 61392024151 | FLURAZEPAM HCL | Flurazepam<br>Hydrochloride |
| 61392024154 | FLURAZEPAM HCL | Flurazepam<br>Hydrochloride |
| 61392024156 | FLURAZEPAM HCL | Flurazepam<br>Hydrochloride |
| 61392024160 | FLURAZEPAM HCL | Flurazepam<br>Hydrochloride |
| 61392024190 | FLURAZEPAM HCL | Flurazepam<br>Hydrochloride |
| 61392024191 | FLURAZEPAM HCL | Flurazepam<br>Hydrochloride |
| 61392037330 | OXAZEPAM       | Oxazepam                    |
| 61392037331 | OXAZEPAM       | Oxazepam                    |
| 61392037332 | OXAZEPAM       | Oxazepam                    |
| 61392037339 | OXAZEPAM       | Oxazepam                    |
| 61392037345 | OXAZEPAM       | Oxazepam                    |
| 61392037351 | OXAZEPAM       | Oxazepam                    |
| 61392037354 | OXAZEPAM       | Oxazepam                    |
| 61392037356 | OXAZEPAM       | Oxazepam                    |
| 61392037360 | OXAZEPAM       | Oxazepam                    |
| 61392037390 | OXAZEPAM       | Oxazepam                    |
| 61392037391 | OXAZEPAM       | Oxazepam                    |
| 61392037630 | OXAZEPAM       | Oxazepam                    |
| 61392037631 | OXAZEPAM       | Oxazepam                    |
| 61392037632 | OXAZEPAM       | Oxazepam                    |
| 61392037639 | OXAZEPAM       | Oxazepam                    |
| 61392037645 | OXAZEPAM       | Oxazepam                    |
| 61392037651 | OXAZEPAM       | Oxazepam                    |
| 61392037654 | OXAZEPAM       | Oxazepam                    |
| 61392037656 | OXAZEPAM       | Oxazepam                    |

|             |           |           |
|-------------|-----------|-----------|
| 61392037660 | OXAZEPAM  | Oxazepam  |
| 61392037690 | OXAZEPAM  | Oxazepam  |
| 61392037691 | OXAZEPAM  | Oxazepam  |
| 61392037930 | OXAZEPAM  | Oxazepam  |
| 61392037931 | OXAZEPAM  | Oxazepam  |
| 61392037932 | OXAZEPAM  | Oxazepam  |
| 61392037939 | OXAZEPAM  | Oxazepam  |
| 61392037945 | OXAZEPAM  | Oxazepam  |
| 61392037951 | OXAZEPAM  | Oxazepam  |
| 61392037954 | OXAZEPAM  | Oxazepam  |
| 61392037956 | OXAZEPAM  | Oxazepam  |
| 61392037960 | OXAZEPAM  | Oxazepam  |
| 61392037990 | OXAZEPAM  | Oxazepam  |
| 61392037991 | OXAZEPAM  | Oxazepam  |
| 61392044930 | LORAZEPAM | Lorazepam |
| 61392044931 | LORAZEPAM | Lorazepam |
| 61392044932 | LORAZEPAM | Lorazepam |
| 61392044939 | LORAZEPAM | Lorazepam |
| 61392044945 | LORAZEPAM | Lorazepam |
| 61392044951 | LORAZEPAM | Lorazepam |
| 61392044954 | LORAZEPAM | Lorazepam |
| 61392044956 | LORAZEPAM | Lorazepam |
| 61392044960 | LORAZEPAM | Lorazepam |
| 61392044990 | LORAZEPAM | Lorazepam |
| 61392044991 | LORAZEPAM | Lorazepam |
| 61392045230 | LORAZEPAM | Lorazepam |
| 61392045231 | LORAZEPAM | Lorazepam |
| 61392045232 | LORAZEPAM | Lorazepam |
| 61392045239 | LORAZEPAM | Lorazepam |
| 61392045245 | LORAZEPAM | Lorazepam |
| 61392045251 | LORAZEPAM | Lorazepam |
| 61392045254 | LORAZEPAM | Lorazepam |
| 61392045256 | LORAZEPAM | Lorazepam |
| 61392045260 | LORAZEPAM | Lorazepam |
| 61392045290 | LORAZEPAM | Lorazepam |
| 61392045291 | LORAZEPAM | Lorazepam |
| 61392045530 | LORAZEPAM | Lorazepam |
| 61392045531 | LORAZEPAM | Lorazepam |
| 61392045532 | LORAZEPAM | Lorazepam |
| 61392045539 | LORAZEPAM | Lorazepam |
| 61392045545 | LORAZEPAM | Lorazepam |
| 61392045551 | LORAZEPAM | Lorazepam |
| 61392045554 | LORAZEPAM | Lorazepam |

|             |               |               |
|-------------|---------------|---------------|
| 61392045556 | LORAZEPAM     | Lorazepam     |
| 61392045560 | LORAZEPAM     | Lorazepam     |
| 61392045590 | LORAZEPAM     | Lorazepam     |
| 61392045591 | LORAZEPAM     | Lorazepam     |
| 61392072130 | DIAZEPAM      | Diazepam      |
| 61392072131 | DIAZEPAM      | Diazepam      |
| 61392072132 | DIAZEPAM      | Diazepam      |
| 61392072139 | DIAZEPAM      | Diazepam      |
| 61392072145 | DIAZEPAM      | Diazepam      |
| 61392072151 | DIAZEPAM      | Diazepam      |
| 61392072154 | DIAZEPAM      | Diazepam      |
| 61392072160 | DIAZEPAM      | Diazepam      |
| 61392072190 | DIAZEPAM      | Diazepam      |
| 61392072191 | DIAZEPAM      | Diazepam      |
|             |               | Midazolam     |
| 61553043563 | MIDAZOLAM HCL | Hydrochloride |
|             |               | Midazolam     |
| 61553093644 | MIDAZOLAM HCL | Hydrochloride |
|             |               | Midazolam     |
| 61553093674 | MIDAZOLAM HCL | Hydrochloride |
|             |               | Midazolam     |
| 61703032007 | MIDAZOLAM HCL | Hydrochloride |
|             |               | Midazolam     |
| 61703032032 | MIDAZOLAM HCL | Hydrochloride |
|             |               | Midazolam     |
| 61703032053 | MIDAZOLAM HCL | Hydrochloride |
|             |               | Midazolam     |
| 61703032107 | MIDAZOLAM HCL | Hydrochloride |
|             |               | Midazolam     |
| 61703032132 | MIDAZOLAM HCL | Hydrochloride |
|             |               | Midazolam     |
| 61703032142 | MIDAZOLAM HCL | Hydrochloride |
|             |               | Midazolam     |
| 61703032153 | MIDAZOLAM HCL | Hydrochloride |
|             |               | Midazolam     |
| 61703032173 | MIDAZOLAM HCL | Hydrochloride |
| 61825016510 | DORAL         | Quazepam      |
| 61919000530 | ALPRAZOLAM    | Alprazolam    |
| 61919000560 | ALPRAZOLAM    | Alprazolam    |
| 61919000590 | ALPRAZOLAM    | Alprazolam    |
| 61919000630 | ALPRAZOLAM    | Alprazolam    |
| 61919000660 | ALPRAZOLAM    | Alprazolam    |
| 61919007010 | DIAZEPAM      | Diazepam      |
| 61919007030 | DIAZEPAM      | Diazepam      |
| 61919007060 | DIAZEPAM      | Diazepam      |

|             |                  |                                   |
|-------------|------------------|-----------------------------------|
| 61919007071 | DIAZEPAM         | Diazepam                          |
| 61919007072 | DIAZEPAM         | Diazepam                          |
| 61919007090 | DIAZEPAM         | Diazepam                          |
| 61919007120 | DIAZEPAM         | Diazepam                          |
| 61919007130 | DIAZEPAM         | Diazepam                          |
| 61919007160 | DIAZEPAM         | Diazepam                          |
| 61919008930 | ALPRAZOLAM       | Alprazolam                        |
| 61919008960 | ALPRAZOLAM       | Alprazolam                        |
| 61919014330 | LORAZEPAM        | Lorazepam                         |
| 61919014360 | LORAZEPAM        | Lorazepam                         |
| 61919021430 | TEMAZEPAM        | Temazepam                         |
| 61919026330 | TEMAZEPAM        | Temazepam                         |
| 61919026430 | TEMAZEPAM        | Temazepam                         |
| 61919036730 | DIAZEPAM         | Diazepam                          |
| 61919036760 | DIAZEPAM         | Diazepam                          |
| 61919036790 | DIAZEPAM         | Diazepam                          |
| 61919043830 | TEMAZEPAM        | Temazepam                         |
| 61919044730 | ALPRAZOLAM       | Alprazolam                        |
| 61919044760 | ALPRAZOLAM       | Alprazolam                        |
| 61919057660 | ALPRAZOLAM       | Alprazolam                        |
| 61919057690 | ALPRAZOLAM       | Alprazolam                        |
| 61919058430 | LORAZEPAM        | Lorazepam                         |
| 61919063960 | ALPRAZOLAM       | Alprazolam                        |
| 62584060901 | ALPRAZOLAM       | Alprazolam                        |
| 62584061001 | ALPRAZOLAM       | Alprazolam                        |
| 62584061101 | ALPRAZOLAM       | Alprazolam                        |
| 62584064601 | CHLORDIAZEPOXIDE | Chlordiazepoxide<br>Hydrochloride |
| 62584064701 | CHLORDIAZEPOXIDE | Chlordiazepoxide<br>Hydrochloride |
| 62584064801 | CHLORDIAZEPOXIDE | Chlordiazepoxide<br>Hydrochloride |
| 62584066601 | DIAZEPAM         | Diazepam                          |
| 62584066633 | DIAZEPAM         | Diazepam                          |
| 62584066701 | DIAZEPAM         | Diazepam                          |
| 62584066733 | DIAZEPAM         | Diazepam                          |
| 62584066801 | DIAZEPAM         | Diazepam                          |
| 62584066833 | DIAZEPAM         | Diazepam                          |
| 62584070501 | FLURAZEPAM HCL   | Flurazepam<br>Hydrochloride       |
| 62584070601 | FLURAZEPAM HCL   | Flurazepam<br>Hydrochloride       |
| 62584076901 | LORAZEPAM        | Lorazepam                         |
| 62584076933 | LORAZEPAM        | Lorazepam                         |

|             |               |                        |
|-------------|---------------|------------------------|
| 62584077001 | LORAZEPAM     | Lorazepam              |
| 62584077033 | LORAZEPAM     | Lorazepam              |
| 62584077101 | LORAZEPAM     | Lorazepam              |
| 62584081201 | OXAZEPAM      | Oxazepam               |
| 62584081211 | OXAZEPAM      | Oxazepam               |
| 62584081301 | OXAZEPAM      | Oxazepam               |
| 62584081311 | OXAZEPAM      | Oxazepam               |
| 62584081401 | OXAZEPAM      | Oxazepam               |
| 62584081411 | OXAZEPAM      | Oxazepam               |
| 62584086001 | TEMAZEPAM     | Temazepam              |
| 62584086033 | TEMAZEPAM     | Temazepam              |
| 62584086201 | TEMAZEPAM     | Temazepam              |
| 62991168201 | LORAZEPAM     | Lorazepam              |
| 62991168202 | LORAZEPAM     | Lorazepam              |
| 62991168204 | LORAZEPAM     | Lorazepam              |
| 62991168205 | LORAZEPAM     | Lorazepam              |
| 62991280501 | ALPRAZOLAM    | Alprazolam             |
| 62991280502 | ALPRAZOLAM    | Alprazolam             |
| 62991280503 | ALPRAZOLAM    | Alprazolam             |
| 62991280504 | ALPRAZOLAM    | Alprazolam             |
| 63004773401 | DORAL         | Quazepam               |
| 63187044330 | ALPRAZOLAM    | Alprazolam             |
| 63187053606 | LORAZEPAM     | Lorazepam              |
| 63275992501 | MIDAZOLAM     | Midazolam              |
| 63275992502 | MIDAZOLAM     | Midazolam              |
| 63275992503 | MIDAZOLAM     | Midazolam              |
| 63275992504 | MIDAZOLAM     | Midazolam              |
| 63275992505 | MIDAZOLAM     | Midazolam              |
| 63275992508 | MIDAZOLAM     | Midazolam              |
| 63275992509 | MIDAZOLAM     | Midazolam              |
| 63275996101 | ALPRAZOLAM    | Alprazolam             |
| 63275996102 | ALPRAZOLAM    | Alprazolam             |
| 63275996104 | ALPRAZOLAM    | Alprazolam             |
| 63275997902 | LORAZEPAM     | Lorazepam              |
| 63275997904 | LORAZEPAM     | Lorazepam              |
| 63275997905 | LORAZEPAM     | Lorazepam<br>Midazolam |
| 63304020518 | MIDAZOLAM HCL | Hydrochloride          |
|             | CLORAZEPATE   | Clorazepate            |
| 63304055201 | DIPOTASSIUM   | Dipotassium            |
|             | CLORAZEPATE   | Clorazepate            |
| 63304055205 | DIPOTASSIUM   | Dipotassium            |
|             | CLORAZEPATE   | Clorazepate            |
| 63304055301 | DIPOTASSIUM   | Dipotassium            |

|             |                            |                            |
|-------------|----------------------------|----------------------------|
|             | CLORAZEPATE                | Clorazepate                |
| 63304055305 | DIPOTASSIUM<br>CLORAZEPATE | Dipotassium<br>Clorazepate |
| 63304055401 | DIPOTASSIUM                | Dipotassium                |
| 63304077201 | LORAZEPAM                  | Lorazepam                  |
| 63304077205 | LORAZEPAM                  | Lorazepam                  |
| 63304077290 | LORAZEPAM                  | Lorazepam                  |
| 63304077301 | LORAZEPAM                  | Lorazepam                  |
| 63304077305 | LORAZEPAM                  | Lorazepam                  |
| 63304077310 | LORAZEPAM                  | Lorazepam                  |
| 63304077390 | LORAZEPAM                  | Lorazepam                  |
| 63304077401 | LORAZEPAM                  | Lorazepam                  |
| 63304077405 | LORAZEPAM                  | Lorazepam                  |
| 63304077490 | LORAZEPAM                  | Lorazepam                  |
|             |                            | Midazolam                  |
| 63323041102 | MIDAZOLAM HCL              | Hydrochloride<br>Midazolam |
| 63323041105 | MIDAZOLAM HCL              | Hydrochloride<br>Midazolam |
| 63323041110 | MIDAZOLAM HCL              | Hydrochloride<br>Midazolam |
| 63323041112 | MIDAZOLAM HCL              | Hydrochloride<br>Midazolam |
| 63323041125 | MIDAZOLAM HCL              | Hydrochloride<br>Midazolam |
| 63323041201 | MIDAZOLAM HCL              | Hydrochloride<br>Midazolam |
| 63323041202 | MIDAZOLAM HCL              | Hydrochloride<br>Midazolam |
| 63323041205 | MIDAZOLAM HCL              | Hydrochloride<br>Midazolam |
| 63323041210 | MIDAZOLAM HCL              | Hydrochloride<br>Midazolam |
| 63323041225 | MIDAZOLAM HCL              | Hydrochloride              |
| 63370093510 | LORAZEPAM                  | Lorazepam                  |
| 63370093515 | LORAZEPAM                  | Lorazepam                  |
| 63370093525 | LORAZEPAM                  | Lorazepam                  |
| 63370093535 | LORAZEPAM                  | Lorazepam                  |
| 63629123300 | LORAZEPAM                  | Lorazepam                  |
| 63629123301 | LORAZEPAM                  | Lorazepam                  |
| 63629123302 | LORAZEPAM                  | Lorazepam                  |
| 63629123303 | LORAZEPAM                  | Lorazepam                  |
| 63629123304 | LORAZEPAM                  | Lorazepam                  |
| 63629123305 | LORAZEPAM                  | Lorazepam                  |
| 63629123306 | LORAZEPAM                  | Lorazepam                  |

|             |            |            |
|-------------|------------|------------|
| 63629123307 | LORAZEPAM  | Lorazepam  |
| 63629123308 | LORAZEPAM  | Lorazepam  |
| 63629123309 | LORAZEPAM  | Lorazepam  |
| 63629152301 | DIAZEPAM   | Diazepam   |
| 63629152302 | DIAZEPAM   | Diazepam   |
| 63629152303 | DIAZEPAM   | Diazepam   |
| 63629152304 | DIAZEPAM   | Diazepam   |
| 63629152305 | DIAZEPAM   | Diazepam   |
| 63629152306 | DIAZEPAM   | Diazepam   |
| 63629152307 | DIAZEPAM   | Diazepam   |
| 63629152308 | DIAZEPAM   | Diazepam   |
| 63629152309 | DIAZEPAM   | Diazepam   |
| 63629152400 | DIAZEPAM   | Diazepam   |
| 63629152401 | DIAZEPAM   | Diazepam   |
| 63629152402 | DIAZEPAM   | Diazepam   |
| 63629152403 | DIAZEPAM   | Diazepam   |
| 63629152404 | DIAZEPAM   | Diazepam   |
| 63629152405 | DIAZEPAM   | Diazepam   |
| 63629152406 | DIAZEPAM   | Diazepam   |
| 63629152407 | DIAZEPAM   | Diazepam   |
| 63629152408 | DIAZEPAM   | Diazepam   |
| 63629152409 | DIAZEPAM   | Diazepam   |
| 63629154101 | ALPRAZOLAM | Alprazolam |
| 63629154102 | ALPRAZOLAM | Alprazolam |
| 63629154103 | ALPRAZOLAM | Alprazolam |
| 63629154104 | ALPRAZOLAM | Alprazolam |
| 63629154105 | ALPRAZOLAM | Alprazolam |
| 63629154106 | ALPRAZOLAM | Alprazolam |
| 63629154107 | ALPRAZOLAM | Alprazolam |
| 63629161901 | TEMAZEPAM  | Temazepam  |
| 63629161902 | TEMAZEPAM  | Temazepam  |
| 63629161903 | TEMAZEPAM  | Temazepam  |
| 63629162101 | TEMAZEPAM  | Temazepam  |
| 63629162102 | TEMAZEPAM  | Temazepam  |
| 63629162103 | TEMAZEPAM  | Temazepam  |
| 63629162104 | TEMAZEPAM  | Temazepam  |
| 63629162105 | TEMAZEPAM  | Temazepam  |
| 63629294201 | ALPRAZOLAM | Alprazolam |
| 63629294202 | ALPRAZOLAM | Alprazolam |
| 63629294203 | ALPRAZOLAM | Alprazolam |
| 63629294204 | ALPRAZOLAM | Alprazolam |
| 63629294205 | ALPRAZOLAM | Alprazolam |
| 63629294206 | ALPRAZOLAM | Alprazolam |

|             |                            |                             |
|-------------|----------------------------|-----------------------------|
| 63629294207 | ALPRAZOLAM                 | Alprazolam                  |
| 63629294208 | ALPRAZOLAM                 | Alprazolam                  |
| 63629294209 | ALPRAZOLAM                 | Alprazolam                  |
| 63629294801 | DIAZEPAM                   | Diazepam                    |
| 63629294802 | DIAZEPAM                   | Diazepam                    |
| 63629294803 | DIAZEPAM                   | Diazepam                    |
| 63629294804 | DIAZEPAM                   | Diazepam                    |
| 63629295301 | LORAZEPAM                  | Lorazepam                   |
| 63629295302 | LORAZEPAM                  | Lorazepam                   |
| 63629295303 | LORAZEPAM                  | Lorazepam                   |
| 63629295304 | LORAZEPAM                  | Lorazepam                   |
| 63629295305 | LORAZEPAM                  | Lorazepam                   |
| 63629295306 | LORAZEPAM                  | Lorazepam                   |
| 63629295401 | LORAZEPAM                  | Lorazepam                   |
| 63629295402 | LORAZEPAM                  | Lorazepam                   |
| 63629295403 | LORAZEPAM                  | Lorazepam                   |
| 63629295404 | LORAZEPAM                  | Lorazepam                   |
| 63629295501 | ALPRAZOLAM                 | Alprazolam                  |
| 63629295502 | ALPRAZOLAM                 | Alprazolam                  |
| 63629295503 | ALPRAZOLAM                 | Alprazolam                  |
| 63629295504 | ALPRAZOLAM                 | Alprazolam                  |
| 63629295505 | ALPRAZOLAM                 | Alprazolam                  |
| 63629295506 | ALPRAZOLAM                 | Alprazolam                  |
| 63629295507 | ALPRAZOLAM                 | Alprazolam                  |
| 63629295601 | TRIAZOLAM                  | Triazolam                   |
| 63629295602 | TRIAZOLAM                  | Triazolam                   |
| 63629295603 | TRIAZOLAM                  | Triazolam                   |
| 63629295604 | TRIAZOLAM                  | Triazolam                   |
| 63629295605 | TRIAZOLAM                  | Triazolam                   |
| 63629295606 | TRIAZOLAM                  | Triazolam                   |
| 63629303401 | FLURAZEPAM                 | Flurazepam<br>Hydrochloride |
| 63629303402 | FLURAZEPAM                 | Flurazepam<br>Hydrochloride |
| 63629320001 | FLURAZEPAM                 | Flurazepam<br>Hydrochloride |
| 63629320002 | FLURAZEPAM HCL             | Flurazepam<br>Hydrochloride |
| 63629330801 | ALPRAZOLAM                 | Alprazolam                  |
| 63629330802 | ALPRAZOLAM                 | Alprazolam                  |
| 63629330803 | ALPRAZOLAM                 | Alprazolam                  |
| 63629330804 | ALPRAZOLAM                 | Alprazolam                  |
| 63629364601 | CLORAZEPATE<br>DIPOTASSIUM | Clorazepate<br>Dipotassium  |

|             |                  |                  |
|-------------|------------------|------------------|
|             | CLORAZEPATE      | Clorazepate      |
| 63629364602 | DIPOTASSIUM      | Dipotassium      |
|             | CLORAZEPATE      | Clorazepate      |
| 63629364603 | DIPOTASSIUM      | Dipotassium      |
|             | CLORAZEPATE      | Clorazepate      |
| 63629385801 | DIPOTASSIUM      | Dipotassium      |
|             | CLORAZEPATE      | Clorazepate      |
| 63629385802 | DIPOTASSIUM      | Dipotassium      |
|             | CLORAZEPATE      | Clorazepate      |
| 63629385901 | DIPOTASSIUM      | Dipotassium      |
|             | CLORAZEPATE      | Clorazepate      |
| 63629385902 | DIPOTASSIUM      | Dipotassium      |
|             | CHLORDIAZEPOXIDE | Chlordiazepoxide |
| 63629402701 | HCL              | Hydrochloride    |
|             | CHLORDIAZEPOXIDE | Chlordiazepoxide |
| 63629402702 | HCL              | Hydrochloride    |
| 63629406101 | ALPRAZOLAM       | Alprazolam       |
| 63629406102 | ALPRAZOLAM       | Alprazolam       |
| 63629444201 | DIAZEPAM         | Diazepam         |
| 63629507801 | QUAZEPAM         | Quazepam         |
| 63629507802 | QUAZEPAM         | Quazepam         |
| 63629507803 | QUAZEPAM         | Quazepam         |
| 63629507804 | QUAZEPAM         | Quazepam         |
| 63629536401 | ALPRAZOLAM       | Alprazolam       |
| 63629536402 | ALPRAZOLAM       | Alprazolam       |
| 63629536403 | ALPRAZOLAM       | Alprazolam       |
| 63739000333 | TEMAZEPAM        | Temazepam        |
| 63739001001 | ALPRAZOLAM       | Alprazolam       |
| 63739001002 | ALPRAZOLAM       | Alprazolam       |
| 63739001010 | ALPRAZOLAM       | Alprazolam       |
| 63739001015 | ALPRAZOLAM       | Alprazolam       |
| 63739001101 | ALPRAZOLAM       | Alprazolam       |
| 63739001102 | ALPRAZOLAM       | Alprazolam       |
| 63739001110 | ALPRAZOLAM       | Alprazolam       |
| 63739001115 | ALPRAZOLAM       | Alprazolam       |
| 63739001201 | ALPRAZOLAM       | Alprazolam       |
| 63739001202 | ALPRAZOLAM       | Alprazolam       |
| 63739001210 | ALPRAZOLAM       | Alprazolam       |
| 63739001215 | ALPRAZOLAM       | Alprazolam       |
| 63739007201 | DIAZEPAM         | Diazepam         |
| 63739007202 | DIAZEPAM         | Diazepam         |
| 63739007301 | DIAZEPAM         | Diazepam         |
| 63739007302 | DIAZEPAM         | Diazepam         |
| 63739007310 | DIAZEPAM         | Diazepam         |

|             |            |            |
|-------------|------------|------------|
| 63739007401 | DIAZEPAM   | Diazepam   |
| 63739007402 | DIAZEPAM   | Diazepam   |
| 63739012510 | TEMAZEPAM  | Temazepam  |
| 63739015401 | LORAZEPAM  | Lorazepam  |
| 63739015403 | LORAZEPAM  | Lorazepam  |
| 63739015410 | LORAZEPAM  | Lorazepam  |
| 63739015415 | LORAZEPAM  | Lorazepam  |
| 63739015501 | LORAZEPAM  | Lorazepam  |
| 63739015503 | LORAZEPAM  | Lorazepam  |
| 63739015510 | LORAZEPAM  | Lorazepam  |
| 63739015515 | LORAZEPAM  | Lorazepam  |
| 63739015601 | LORAZEPAM  | Lorazepam  |
| 63739015603 | LORAZEPAM  | Lorazepam  |
| 63739015610 | LORAZEPAM  | Lorazepam  |
| 63739015615 | LORAZEPAM  | Lorazepam  |
| 63739023110 | TEMAZEPAM  | Temazepam  |
| 63739023115 | TEMAZEPAM  | Temazepam  |
| 63739023210 | TEMAZEPAM  | Temazepam  |
| 63739023215 | TEMAZEPAM  | Temazepam  |
| 63739049904 | LORAZEPAM  | Lorazepam  |
| 63739049910 | LORAZEPAM  | Lorazepam  |
| 63739050004 | LORAZEPAM  | Lorazepam  |
| 63739050010 | LORAZEPAM  | Lorazepam  |
| 63739050110 | LORAZEPAM  | Lorazepam  |
| 63739064410 | ALPRAZOLAM | Alprazolam |
| 63739066910 | ALPRAZOLAM | Alprazolam |
| 63739067410 | ALPRAZOLAM | Alprazolam |
| 63857032710 | SERAX      | Oxazepam   |
| 63857032810 | SERAX      | Oxazepam   |
| 63857032910 | SERAX      | Oxazepam   |
| 63857033210 | SERAX      | Oxazepam   |
| 63874020501 | LORAZEPAM  | Lorazepam  |
| 63874020502 | LORAZEPAM  | Lorazepam  |
| 63874020503 | LORAZEPAM  | Lorazepam  |
| 63874020504 | LORAZEPAM  | Lorazepam  |
| 63874020506 | LORAZEPAM  | Lorazepam  |
| 63874020510 | LORAZEPAM  | Lorazepam  |
| 63874020512 | LORAZEPAM  | Lorazepam  |
| 63874020515 | LORAZEPAM  | Lorazepam  |
| 63874020520 | LORAZEPAM  | Lorazepam  |
| 63874020530 | LORAZEPAM  | Lorazepam  |
| 63874020550 | LORAZEPAM  | Lorazepam  |
| 63874020560 | LORAZEPAM  | Lorazepam  |

|             |                |               |
|-------------|----------------|---------------|
| 63874020572 | LORAZEPAM      | Lorazepam     |
| 63874020574 | LORAZEPAM      | Lorazepam     |
| 63874020577 | LORAZEPAM      | Lorazepam     |
| 63874020590 | LORAZEPAM      | Lorazepam     |
| 63874020701 | LORAZEPAM      | Lorazepam     |
| 63874020704 | LORAZEPAM      | Lorazepam     |
| 63874020712 | LORAZEPAM      | Lorazepam     |
| 63874020715 | LORAZEPAM      | Lorazepam     |
| 63874020720 | LORAZEPAM      | Lorazepam     |
| 63874020730 | LORAZEPAM      | Lorazepam     |
| 63874020760 | LORAZEPAM      | Lorazepam     |
| 63874020772 | LORAZEPAM      | Lorazepam     |
| 63874020774 | LORAZEPAM      | Lorazepam     |
| 63874020777 | LORAZEPAM      | Lorazepam     |
| 63874020790 | LORAZEPAM      | Lorazepam     |
| 63874020801 | LORAZEPAM      | Lorazepam     |
| 63874020810 | LORAZEPAM      | Lorazepam     |
| 63874020815 | LORAZEPAM      | Lorazepam     |
| 63874020820 | LORAZEPAM      | Lorazepam     |
| 63874020830 | LORAZEPAM      | Lorazepam     |
| 63874020836 | LORAZEPAM      | Lorazepam     |
| 63874020860 | LORAZEPAM      | Lorazepam     |
| 63874020890 | LORAZEPAM      | Lorazepam     |
|             |                | Flurazepam    |
| 63874021301 | FLURAZEPAM HCL | Hydrochloride |
|             |                | Flurazepam    |
| 63874021305 | FLURAZEPAM HCL | Hydrochloride |
|             |                | Flurazepam    |
| 63874021312 | FLURAZEPAM HCL | Hydrochloride |
|             |                | Flurazepam    |
| 63874021315 | FLURAZEPAM HCL | Hydrochloride |
|             |                | Flurazepam    |
| 63874021320 | FLURAZEPAM HCL | Hydrochloride |
|             |                | Flurazepam    |
| 63874021330 | FLURAZEPAM HCL | Hydrochloride |
|             |                | Flurazepam    |
| 63874021340 | FLURAZEPAM HCL | Hydrochloride |
|             |                | Flurazepam    |
| 63874021360 | FLURAZEPAM HCL | Hydrochloride |
|             |                | Flurazepam    |
| 63874021401 | FLURAZEPAM HCL | Hydrochloride |
|             |                | Flurazepam    |
| 63874021406 | FLURAZEPAM HCL | Hydrochloride |
|             |                | Flurazepam    |
| 63874021409 | FLURAZEPAM HCL | Hydrochloride |

|             |                |                             |
|-------------|----------------|-----------------------------|
| 63874021410 | FLURAZEPAM HCL | Flurazepam<br>Hydrochloride |
| 63874021412 | FLURAZEPAM HCL | Flurazepam<br>Hydrochloride |
| 63874021414 | FLURAZEPAM HCL | Flurazepam<br>Hydrochloride |
| 63874021415 | FLURAZEPAM HCL | Flurazepam<br>Hydrochloride |
| 63874021420 | FLURAZEPAM HCL | Flurazepam<br>Hydrochloride |
| 63874021421 | FLURAZEPAM HCL | Flurazepam<br>Hydrochloride |
| 63874021424 | FLURAZEPAM HCL | Flurazepam<br>Hydrochloride |
| 63874021430 | FLURAZEPAM HCL | Flurazepam<br>Hydrochloride |
| 63874021460 | FLURAZEPAM HCL | Flurazepam<br>Hydrochloride |
| 63874022601 | DIAZEPAM       | Diazepam                    |
| 63874022602 | DIAZEPAM       | Diazepam                    |
| 63874022604 | DIAZEPAM       | Diazepam                    |
| 63874022610 | DIAZEPAM       | Diazepam                    |
| 63874022612 | DIAZEPAM       | Diazepam                    |
| 63874022615 | DIAZEPAM       | Diazepam                    |
| 63874022620 | DIAZEPAM       | Diazepam                    |
| 63874022628 | DIAZEPAM       | Diazepam                    |
| 63874022630 | DIAZEPAM       | Diazepam                    |
| 63874022660 | DIAZEPAM       | Diazepam                    |
| 63874022690 | DIAZEPAM       | Diazepam                    |
| 63874022701 | DIAZEPAM       | Diazepam                    |
| 63874022702 | DIAZEPAM       | Diazepam                    |
| 63874022704 | DIAZEPAM       | Diazepam                    |
| 63874022705 | DIAZEPAM       | Diazepam                    |
| 63874022706 | DIAZEPAM       | Diazepam                    |
| 63874022708 | DIAZEPAM       | Diazepam                    |
| 63874022709 | DIAZEPAM       | Diazepam                    |
| 63874022710 | DIAZEPAM       | Diazepam                    |
| 63874022712 | DIAZEPAM       | Diazepam                    |
| 63874022714 | DIAZEPAM       | Diazepam                    |
| 63874022715 | DIAZEPAM       | Diazepam                    |
| 63874022716 | DIAZEPAM       | Diazepam                    |
| 63874022718 | DIAZEPAM       | Diazepam                    |
| 63874022720 | DIAZEPAM       | Diazepam                    |
| 63874022721 | DIAZEPAM       | Diazepam                    |
| 63874022724 | DIAZEPAM       | Diazepam                    |

|             |            |            |
|-------------|------------|------------|
| 63874022728 | DIAZEPAM   | Diazepam   |
| 63874022730 | DIAZEPAM   | Diazepam   |
| 63874022736 | DIAZEPAM   | Diazepam   |
| 63874022740 | DIAZEPAM   | Diazepam   |
| 63874022750 | DIAZEPAM   | Diazepam   |
| 63874022760 | DIAZEPAM   | Diazepam   |
| 63874022772 | DIAZEPAM   | Diazepam   |
| 63874022774 | DIAZEPAM   | Diazepam   |
| 63874022777 | DIAZEPAM   | Diazepam   |
| 63874022787 | DIAZEPAM   | Diazepam   |
| 63874022790 | DIAZEPAM   | Diazepam   |
| 63874022801 | DIAZEPAM   | Diazepam   |
| 63874022802 | DIAZEPAM   | Diazepam   |
| 63874022804 | DIAZEPAM   | Diazepam   |
| 63874022806 | DIAZEPAM   | Diazepam   |
| 63874022809 | DIAZEPAM   | Diazepam   |
| 63874022810 | DIAZEPAM   | Diazepam   |
| 63874022812 | DIAZEPAM   | Diazepam   |
| 63874022815 | DIAZEPAM   | Diazepam   |
| 63874022820 | DIAZEPAM   | Diazepam   |
| 63874022828 | DIAZEPAM   | Diazepam   |
| 63874022830 | DIAZEPAM   | Diazepam   |
| 63874022840 | DIAZEPAM   | Diazepam   |
| 63874022860 | DIAZEPAM   | Diazepam   |
| 63874022872 | DIAZEPAM   | Diazepam   |
| 63874022874 | DIAZEPAM   | Diazepam   |
| 63874022877 | DIAZEPAM   | Diazepam   |
| 63874022890 | DIAZEPAM   | Diazepam   |
| 63874022901 | DIAZEPAM   | Diazepam   |
| 63874022910 | DIAZEPAM   | Diazepam   |
| 63874025101 | ALPRAZOLAM | Alprazolam |
| 63874025102 | ALPRAZOLAM | Alprazolam |
| 63874025110 | ALPRAZOLAM | Alprazolam |
| 63874025112 | ALPRAZOLAM | Alprazolam |
| 63874025114 | ALPRAZOLAM | Alprazolam |
| 63874025115 | ALPRAZOLAM | Alprazolam |
| 63874025120 | ALPRAZOLAM | Alprazolam |
| 63874025130 | ALPRAZOLAM | Alprazolam |
| 63874025160 | ALPRAZOLAM | Alprazolam |
| 63874025172 | ALPRAZOLAM | Alprazolam |
| 63874025174 | ALPRAZOLAM | Alprazolam |
| 63874025177 | ALPRAZOLAM | Alprazolam |
| 63874025190 | ALPRAZOLAM | Alprazolam |

|             |                  |                  |
|-------------|------------------|------------------|
| 63874025201 | ALPRAZOLAM       | Alprazolam       |
| 63874025202 | ALPRAZOLAM       | Alprazolam       |
| 63874025204 | ALPRAZOLAM       | Alprazolam       |
| 63874025206 | ALPRAZOLAM       | Alprazolam       |
| 63874025209 | ALPRAZOLAM       | Alprazolam       |
| 63874025210 | ALPRAZOLAM       | Alprazolam       |
| 63874025212 | ALPRAZOLAM       | Alprazolam       |
| 63874025214 | ALPRAZOLAM       | Alprazolam       |
| 63874025215 | ALPRAZOLAM       | Alprazolam       |
| 63874025218 | ALPRAZOLAM       | Alprazolam       |
| 63874025220 | ALPRAZOLAM       | Alprazolam       |
| 63874025224 | ALPRAZOLAM       | Alprazolam       |
| 63874025230 | ALPRAZOLAM       | Alprazolam       |
| 63874025250 | ALPRAZOLAM       | Alprazolam       |
| 63874025260 | ALPRAZOLAM       | Alprazolam       |
| 63874025272 | ALPRAZOLAM       | Alprazolam       |
| 63874025274 | ALPRAZOLAM       | Alprazolam       |
| 63874025277 | ALPRAZOLAM       | Alprazolam       |
| 63874025290 | ALPRAZOLAM       | Alprazolam       |
| 63874025301 | ALPRAZOLAM       | Alprazolam       |
| 63874025302 | ALPRAZOLAM       | Alprazolam       |
| 63874025303 | ALPRAZOLAM       | Alprazolam       |
| 63874025304 | ALPRAZOLAM       | Alprazolam       |
| 63874025310 | ALPRAZOLAM       | Alprazolam       |
| 63874025312 | ALPRAZOLAM       | Alprazolam       |
| 63874025314 | ALPRAZOLAM       | Alprazolam       |
| 63874025315 | ALPRAZOLAM       | Alprazolam       |
| 63874025318 | ALPRAZOLAM       | Alprazolam       |
| 63874025320 | ALPRAZOLAM       | Alprazolam       |
| 63874025321 | ALPRAZOLAM       | Alprazolam       |
| 63874025324 | ALPRAZOLAM       | Alprazolam       |
| 63874025325 | ALPRAZOLAM       | Alprazolam       |
| 63874025328 | ALPRAZOLAM       | Alprazolam       |
| 63874025330 | ALPRAZOLAM       | Alprazolam       |
| 63874025340 | ALPRAZOLAM       | Alprazolam       |
| 63874025350 | ALPRAZOLAM       | Alprazolam       |
| 63874025360 | ALPRAZOLAM       | Alprazolam       |
| 63874025372 | ALPRAZOLAM       | Alprazolam       |
| 63874025374 | ALPRAZOLAM       | Alprazolam       |
| 63874025377 | ALPRAZOLAM       | Alprazolam       |
| 63874025390 | ALPRAZOLAM       | Alprazolam       |
|             | CHLORDIAZEPOXIDE | Chlordiazepoxide |
| 63874025601 | HCL              | Hydrochloride    |

|             |                         |                                   |
|-------------|-------------------------|-----------------------------------|
| 63874025608 | CHLORDIAZEPOXIDE<br>HCL | Chlordiazepoxide<br>Hydrochloride |
| 63874025610 | CHLORDIAZEPOXIDE<br>HCL | Chlordiazepoxide<br>Hydrochloride |
| 63874025612 | CHLORDIAZEPOXIDE<br>HCL | Chlordiazepoxide<br>Hydrochloride |
| 63874025614 | CHLORDIAZEPOXIDE<br>HCL | Chlordiazepoxide<br>Hydrochloride |
| 63874025615 | CHLORDIAZEPOXIDE<br>HCL | Chlordiazepoxide<br>Hydrochloride |
| 63874025620 | CHLORDIAZEPOXIDE<br>HCL | Chlordiazepoxide<br>Hydrochloride |
| 63874025621 | CHLORDIAZEPOXIDE<br>HCL | Chlordiazepoxide<br>Hydrochloride |
| 63874025624 | CHLORDIAZEPOXIDE<br>HCL | Chlordiazepoxide<br>Hydrochloride |
| 63874025625 | CHLORDIAZEPOXIDE<br>HCL | Chlordiazepoxide<br>Hydrochloride |
| 63874025628 | CHLORDIAZEPOXIDE<br>HCL | Chlordiazepoxide<br>Hydrochloride |
| 63874025630 | CHLORDIAZEPOXIDE<br>HCL | Chlordiazepoxide<br>Hydrochloride |
| 63874025640 | CHLORDIAZEPOXIDE<br>HCL | Chlordiazepoxide<br>Hydrochloride |
| 63874025660 | CHLORDIAZEPOXIDE<br>HCL | Chlordiazepoxide<br>Hydrochloride |
| 63874027410 | CHLORDIAZEPOXIDE<br>HCL | Chlordiazepoxide<br>Hydrochloride |
| 63874027412 | CHLORDIAZEPOXIDE<br>HCL | Chlordiazepoxide<br>Hydrochloride |
| 63874027430 | CHLORDIAZEPOXIDE<br>HCL | Chlordiazepoxide<br>Hydrochloride |
| 63874028101 | TRIAZOLAM               | Triazolam                         |
| 63874028104 | TRIAZOLAM               | Triazolam                         |
| 63874028105 | TRIAZOLAM               | Triazolam                         |
| 63874028110 | TRIAZOLAM               | Triazolam                         |
| 63874028115 | TRIAZOLAM               | Triazolam                         |
| 63874028120 | TRIAZOLAM               | Triazolam                         |
| 63874028130 | TRIAZOLAM               | Triazolam                         |
| 63874028150 | TRIAZOLAM               | Triazolam                         |
| 63874028160 | TRIAZOLAM               | Triazolam                         |
| 63874028172 | TRIAZOLAM               | Triazolam                         |
| 63874028174 | TRIAZOLAM               | Triazolam                         |
| 63874028177 | TRIAZOLAM               | Triazolam                         |
| 63874028190 | TRIAZOLAM               | Triazolam                         |
| 63874029201 | TEMAZEPAM               | Temazepam                         |

|             |                            |                            |
|-------------|----------------------------|----------------------------|
| 63874029204 | TEMAZEPAM                  | Temazepam                  |
| 63874029210 | TEMAZEPAM                  | Temazepam                  |
| 63874029212 | TEMAZEPAM                  | Temazepam                  |
| 63874029215 | TEMAZEPAM                  | Temazepam                  |
| 63874029220 | TEMAZEPAM                  | Temazepam                  |
| 63874029230 | TEMAZEPAM                  | Temazepam                  |
| 63874029260 | TEMAZEPAM                  | Temazepam                  |
| 63874029274 | TEMAZEPAM                  | Temazepam                  |
| 63874029290 | TEMAZEPAM                  | Temazepam                  |
| 63874071301 | TEMAZEPAM                  | Temazepam                  |
| 63874071304 | TEMAZEPAM                  | Temazepam                  |
| 63874071312 | TEMAZEPAM                  | Temazepam                  |
| 63874071315 | TEMAZEPAM                  | Temazepam                  |
| 63874071320 | TEMAZEPAM                  | Temazepam                  |
| 63874071330 | TEMAZEPAM                  | Temazepam                  |
| 63874071340 | TEMAZEPAM                  | Temazepam                  |
| 63874071360 | TEMAZEPAM                  | Temazepam                  |
| 63874071374 | TEMAZEPAM                  | Temazepam                  |
| 63874071390 | TEMAZEPAM                  | Temazepam                  |
| 63874080812 | TRIAZOLAM                  | Triazolam                  |
| 63874080815 | TRIAZOLAM                  | Triazolam                  |
| 63874080820 | TRIAZOLAM                  | Triazolam                  |
| 63874080830 | TRIAZOLAM                  | Triazolam                  |
| 63874101601 | ALPRAZOLAM                 | Alprazolam                 |
| 63874101602 | ALPRAZOLAM                 | Alprazolam                 |
| 63874101603 | ALPRAZOLAM                 | Alprazolam                 |
| 63874101604 | ALPRAZOLAM                 | Alprazolam                 |
| 63874101605 | ALPRAZOLAM                 | Alprazolam                 |
| 63874101606 | ALPRAZOLAM                 | Alprazolam                 |
| 63874101608 | ALPRAZOLAM                 | Alprazolam                 |
| 63874101609 | ALPRAZOLAM                 | Alprazolam                 |
| 63874123903 | CLORAZEPATE                | Clorazepate                |
| 63874123906 | DIPOTASSIUM<br>CLORAZEPATE | Dipotassium<br>Clorazepate |
| 63874124203 | DIPOTASSIUM<br>CLORAZEPATE | Dipotassium<br>Clorazepate |
| 63874124206 | DIPOTASSIUM                | Dipotassium                |
| 64125090401 | LORAZEPAM                  | Lorazepam                  |
| 64125090405 | LORAZEPAM                  | Lorazepam                  |
| 64125090410 | LORAZEPAM                  | Lorazepam                  |
| 64125090501 | LORAZEPAM                  | Lorazepam                  |
| 64125090505 | LORAZEPAM                  | Lorazepam                  |

|             |               |                            |
|-------------|---------------|----------------------------|
| 64125090510 | LORAZEPAM     | Lorazepam                  |
| 64125090601 | LORAZEPAM     | Lorazepam                  |
| 64125090605 | LORAZEPAM     | Lorazepam                  |
| 64125090610 | LORAZEPAM     | Lorazepam                  |
| 64376063001 | ALPRAZOLAM    | Alprazolam                 |
| 64376063005 | ALPRAZOLAM    | Alprazolam                 |
| 64376063010 | ALPRAZOLAM    | Alprazolam                 |
| 64376063101 | ALPRAZOLAM    | Alprazolam                 |
| 64376063105 | ALPRAZOLAM    | Alprazolam                 |
| 64376063110 | ALPRAZOLAM    | Alprazolam                 |
| 64376063201 | ALPRAZOLAM    | Alprazolam                 |
| 64376063205 | ALPRAZOLAM    | Alprazolam                 |
| 64376063210 | ALPRAZOLAM    | Alprazolam                 |
| 64376063301 | ALPRAZOLAM    | Alprazolam                 |
| 64376063305 | ALPRAZOLAM    | Alprazolam                 |
| 64455006301 | ATIVAN        | Lorazepam                  |
| 64455006401 | ATIVAN        | Lorazepam                  |
| 64455006410 | ATIVAN        | Lorazepam                  |
| 64455006501 | ATIVAN        | Lorazepam<br>Midazolam     |
| 64679076201 | MIDAZOLAM HCL | Hydrochloride<br>Midazolam |
| 64679076202 | MIDAZOLAM HCL | Hydrochloride<br>Midazolam |
| 64679076203 | MIDAZOLAM HCL | Hydrochloride<br>Midazolam |
| 64679076301 | MIDAZOLAM HCL | Hydrochloride<br>Midazolam |
| 64679076302 | MIDAZOLAM HCL | Hydrochloride<br>Midazolam |
| 64679076303 | MIDAZOLAM HCL | Hydrochloride<br>Midazolam |
| 64679076304 | MIDAZOLAM HCL | Hydrochloride              |
| 64980014006 | ALPRAZOLAM    | Alprazolam                 |
| 64980014106 | ALPRAZOLAM    | Alprazolam                 |
| 64980014206 | ALPRAZOLAM    | Alprazolam                 |
| 64980014306 | ALPRAZOLAM    | Alprazolam                 |
| 65162001510 | LORAZEPAM     | Lorazepam                  |
| 65162001550 | LORAZEPAM     | Lorazepam                  |
| 65162001710 | LORAZEPAM     | Lorazepam                  |
| 65162001750 | LORAZEPAM     | Lorazepam                  |
| 65162001810 | LORAZEPAM     | Lorazepam                  |
| 65162001850 | LORAZEPAM     | Lorazepam                  |
| 65162055610 | TEMAZEPAM     | Temazepam                  |

|             |            |                            |
|-------------|------------|----------------------------|
| 65162055650 | TEMAZEPAM  | Temazepam                  |
| 65162055710 | TEMAZEPAM  | Temazepam                  |
| 65162055750 | TEMAZEPAM  | Temazepam                  |
| 65162058310 | TEMAZEPAM  | Temazepam                  |
| 65162058403 | TEMAZEPAM  | Temazepam                  |
| 65162068784 | LORAZEPAM  | Lorazepam                  |
| 65162080906 | ALPRAZOLAM | Alprazolam                 |
| 65162081006 | ALPRAZOLAM | Alprazolam                 |
| 65162081206 | ALPRAZOLAM | Alprazolam                 |
| 65162081306 | ALPRAZOLAM | Alprazolam<br>Midazolam    |
| 65293041102 | MIDAZOLAM  | Hydrochloride<br>Midazolam |
| 65293041125 | MIDAZOLAM  | Hydrochloride<br>Midazolam |
| 65293041210 | MIDAZOLAM  | Hydrochloride<br>Midazolam |
| 65293041302 | MIDAZOLAM  | Hydrochloride<br>Midazolam |
| 65293041310 | MIDAZOLAM  | Hydrochloride<br>Midazolam |
| 65293041405 | MIDAZOLAM  | Hydrochloride<br>Midazolam |
| 65293041410 | MIDAZOLAM  | Hydrochloride<br>Midazolam |
| 65293041510 | MIDAZOLAM  | Hydrochloride<br>Midazolam |
| 65293041605 | MIDAZOLAM  | Hydrochloride<br>Midazolam |
| 65293041625 | MIDAZOLAM  | Hydrochloride<br>Midazolam |
| 65293041701 | MIDAZOLAM  | Hydrochloride<br>Midazolam |
| 65293041725 | MIDAZOLAM  | Hydrochloride              |
| 65862045460 | ALPRAZOLAM | Alprazolam                 |
| 65862045560 | ALPRAZOLAM | Alprazolam                 |
| 65862045660 | ALPRAZOLAM | Alprazolam                 |
| 65862045760 | ALPRAZOLAM | Alprazolam                 |
| 66116023230 | ALPRAZOLAM | Alprazolam                 |
| 66267001330 | ALPRAZOLAM | Alprazolam                 |
| 66267001360 | ALPRAZOLAM | Alprazolam                 |
| 66267001390 | ALPRAZOLAM | Alprazolam                 |
| 66267001428 | ALPRAZOLAM | Alprazolam                 |
| 66267001430 | ALPRAZOLAM | Alprazolam                 |
| 66267001460 | ALPRAZOLAM | Alprazolam                 |

|             |                |                             |
|-------------|----------------|-----------------------------|
| 66267001490 | ALPRAZOLAM     | Alprazolam                  |
| 66267001491 | ALPRAZOLAM     | Alprazolam                  |
| 66267006801 | DIAZEPAM       | Diazepam                    |
| 66267006802 | DIAZEPAM       | Diazepam                    |
| 66267006804 | DIAZEPAM       | Diazepam                    |
| 66267006810 | DIAZEPAM       | Diazepam                    |
| 66267006815 | DIAZEPAM       | Diazepam                    |
| 66267006820 | DIAZEPAM       | Diazepam                    |
| 66267006828 | DIAZEPAM       | Diazepam                    |
| 66267006830 | DIAZEPAM       | Diazepam                    |
| 66267006840 | DIAZEPAM       | Diazepam                    |
| 66267006845 | DIAZEPAM       | Diazepam                    |
| 66267006860 | DIAZEPAM       | Diazepam                    |
| 66267006878 | DIAZEPAM       | Diazepam                    |
| 66267006890 | DIAZEPAM       | Diazepam                    |
| 66267006891 | DIAZEPAM       | Diazepam                    |
| 66267006902 | DIAZEPAM       | Diazepam                    |
| 66267006903 | DIAZEPAM       | Diazepam                    |
| 66267006904 | DIAZEPAM       | Diazepam                    |
| 66267006906 | DIAZEPAM       | Diazepam                    |
| 66267006910 | DIAZEPAM       | Diazepam                    |
| 66267006912 | DIAZEPAM       | Diazepam                    |
| 66267006915 | DIAZEPAM       | Diazepam                    |
| 66267006920 | DIAZEPAM       | Diazepam                    |
| 66267006930 | DIAZEPAM       | Diazepam                    |
| 66267006940 | DIAZEPAM       | Diazepam                    |
| 66267006960 | DIAZEPAM       | Diazepam                    |
| 66267006990 | DIAZEPAM       | Diazepam                    |
| 66267006991 | DIAZEPAM       | Diazepam                    |
| 66267013330 | LORAZEPAM      | Lorazepam                   |
| 66267013360 | LORAZEPAM      | Lorazepam                   |
| 66267021930 | ALPRAZOLAM     | Alprazolam                  |
| 66267021960 | ALPRAZOLAM     | Alprazolam                  |
| 66267021990 | ALPRAZOLAM     | Alprazolam                  |
| 66267032110 | TEMAZEPAM      | Temazepam                   |
| 66267032128 | TEMAZEPAM      | Temazepam                   |
| 66267032130 | TEMAZEPAM      | Temazepam                   |
| 66267032160 | TEMAZEPAM      | Temazepam                   |
| 66267033115 | FLURAZEPAM HCL | Hydrochloride<br>Flurazepam |
| 66267033130 | FLURAZEPAM HCL | Hydrochloride               |
| 66267033145 | FLURAZEPAM HCL | Flurazepam                  |

|             |            | Hydrochloride |
|-------------|------------|---------------|
| 66267041530 | TEMAZEPAM  | Temazepam     |
| 66267041560 | TEMAZEPAM  | Temazepam     |
| 66267042720 | LORAZEPAM  | Lorazepam     |
| 66267042730 | LORAZEPAM  | Lorazepam     |
| 66267042760 | LORAZEPAM  | Lorazepam     |
| 66267042790 | LORAZEPAM  | Lorazepam     |
| 66267049230 | TRIAZOLAM  | Triazolam     |
| 66267055002 | DIAZEPAM   | Diazepam      |
| 66267055012 | DIAZEPAM   | Diazepam      |
| 66267055020 | DIAZEPAM   | Diazepam      |
| 66267055030 | DIAZEPAM   | Diazepam      |
| 66267055060 | DIAZEPAM   | Diazepam      |
| 66267055090 | DIAZEPAM   | Diazepam      |
| 66267056491 | ALPRAZOLAM | Alprazolam    |
| 66267060830 | LORAZEPAM  | Lorazepam     |
| 66267077602 | DIAZEPAM   | Diazepam      |
| 66267077603 | DIAZEPAM   | Diazepam      |
| 66267077604 | DIAZEPAM   | Diazepam      |
| 66267077606 | DIAZEPAM   | Diazepam      |
| 66267077610 | DIAZEPAM   | Diazepam      |
| 66267079806 | LORAZEPAM  | Lorazepam     |
| 66267083504 | LORAZEPAM  | Lorazepam     |
| 66267129500 | ATIVAN     | Lorazepam     |
| 66267130606 | XANAX XR   | Alprazolam    |
| 66336000510 | TEMAZEPAM  | Temazepam     |
| 66336000530 | TEMAZEPAM  | Temazepam     |
| 66336000560 | TEMAZEPAM  | Temazepam     |
| 66336000590 | TEMAZEPAM  | Temazepam     |
| 66336003302 | DIAZEPAM   | Diazepam      |
| 66336003310 | DIAZEPAM   | Diazepam      |
| 66336003330 | DIAZEPAM   | Diazepam      |
| 66336003344 | DIAZEPAM   | Diazepam      |
| 66336003360 | DIAZEPAM   | Diazepam      |
| 66336003390 | DIAZEPAM   | Diazepam      |
| 66336003394 | DIAZEPAM   | Diazepam      |
| 66336004708 | LORAZEPAM  | Lorazepam     |
| 66336004710 | LORAZEPAM  | Lorazepam     |
| 66336004715 | LORAZEPAM  | Lorazepam     |
| 66336004720 | LORAZEPAM  | Lorazepam     |
| 66336004730 | LORAZEPAM  | Lorazepam     |
| 66336004744 | LORAZEPAM  | Lorazepam     |
| 66336004760 | LORAZEPAM  | Lorazepam     |

|             |                  |                         |
|-------------|------------------|-------------------------|
| 66336004790 | LORAZEPAM        | Lorazepam               |
| 66336004794 | LORAZEPAM        | Lorazepam<br>Flurazepam |
| 66336023930 | FLURAZEPAM HCL   | Hydrochloride           |
| 66336036310 | LORAZEPAM        | Lorazepam               |
| 66336036330 | LORAZEPAM        | Lorazepam               |
| 66336036344 | LORAZEPAM        | Lorazepam               |
| 66336036360 | LORAZEPAM        | Lorazepam               |
| 66336036390 | LORAZEPAM        | Lorazepam               |
| 66336040328 | ALPRAZOLAM       | Alprazolam              |
| 66336040330 | ALPRAZOLAM       | Alprazolam              |
| 66336040360 | ALPRAZOLAM       | Alprazolam              |
| 66336040390 | ALPRAZOLAM       | Alprazolam              |
| 66336047802 | DIAZEPAM         | Diazepam                |
| 66336047806 | DIAZEPAM         | Diazepam                |
| 66336047810 | DIAZEPAM         | Diazepam                |
| 66336047815 | DIAZEPAM         | Diazepam                |
| 66336047830 | DIAZEPAM         | Diazepam                |
| 66336047860 | DIAZEPAM         | Diazepam                |
| 66336047890 | DIAZEPAM         | Diazepam                |
| 66336047894 | DIAZEPAM         | Diazepam                |
| 66336057902 | DIAZEPAM         | Diazepam                |
| 66336057908 | DIAZEPAM         | Diazepam                |
| 66336057930 | DIAZEPAM         | Diazepam                |
| 66336057990 | DIAZEPAM         | Diazepam                |
| 66336066810 | TEMAZEPAM        | Temazepam               |
| 66336066830 | TEMAZEPAM        | Temazepam               |
| 66336066860 | TEMAZEPAM        | Temazepam               |
| 66336066890 | TEMAZEPAM        | Temazepam               |
|             | CHLORDIAZEPOXIDE | Chlordiazepoxide        |
| 66336074230 | HCL              | Hydrochloride           |
| 66336080030 | LORAZEPAM        | Lorazepam               |
| 66336080090 | LORAZEPAM        | Lorazepam               |
| 66336080099 | LORAZEPAM        | Lorazepam               |
| 66336086130 | ALPRAZOLAM       | Alprazolam              |
| 66336086160 | ALPRAZOLAM       | Alprazolam              |
| 66336086190 | ALPRAZOLAM       | Alprazolam              |
| 66336086194 | ALPRAZOLAM       | Alprazolam              |
| 66336087620 | ALPRAZOLAM       | Alprazolam              |
| 66336087630 | ALPRAZOLAM       | Alprazolam              |
| 66336087660 | ALPRAZOLAM       | Alprazolam              |
| 66336087690 | ALPRAZOLAM       | Alprazolam              |
| 66336088603 | TRIAZOLAM        | Triazolam               |

|             |                   |                    |
|-------------|-------------------|--------------------|
| 66336088630 | TRIAZOLAM         | Triazolam          |
| 66336093210 | ALPRAZOLAM        | Alprazolam         |
| 66336093230 | ALPRAZOLAM        | Alprazolam         |
| 66336093260 | ALPRAZOLAM        | Alprazolam         |
| 66336093290 | ALPRAZOLAM        | Alprazolam         |
| 66336093294 | ALPRAZOLAM        | Alprazolam         |
| 66490065020 | DIASTAT PEDIATRIC | Diazepam;lubricant |
| 66490065120 | DIASTAT PEDIATRIC | Diazepam;lubricant |
| 66490065220 | DIASTAT           | Diazepam;lubricant |
| 66490065420 | DIASTAT           | Diazepam;lubricant |
| 66490065520 | DIASTAT           | Diazepam;lubricant |
|             |                   | Midazolam          |
| 66758000119 | MIDAZOLAM HCL     | Hydrochloride      |
|             |                   | Midazolam          |
| 66758001801 | MIDAZOLAM HCL     | Hydrochloride      |
|             |                   | Midazolam          |
| 66758001802 | MIDAZOLAM HCL     | Hydrochloride      |
|             |                   | Midazolam          |
| 66758001901 | MIDAZOLAM HCL     | Hydrochloride      |
|             |                   | Midazolam          |
| 66758001902 | MIDAZOLAM HCL     | Hydrochloride      |
| 66758002001 | DIAZEPAM          | Diazepam           |
| 66758002002 | DIAZEPAM          | Diazepam           |
|             |                   | Midazolam          |
| 66860013002 | MIDAZOLAM HCL     | Hydrochloride      |
|             |                   | Midazolam          |
| 66860013202 | MIDAZOLAM HCL     | Hydrochloride      |
|             |                   | Midazolam          |
| 66860013302 | MIDAZOLAM HCL     | Hydrochloride      |
|             |                   | Midazolam          |
| 66860014002 | MIDAZOLAM HCL     | Hydrochloride      |
|             |                   | Midazolam          |
| 66860014102 | MIDAZOLAM HCL     | Hydrochloride      |
|             |                   | Midazolam          |
| 66860014202 | MIDAZOLAM HCL     | Hydrochloride      |
|             |                   | Midazolam          |
| 66860014502 | MIDAZOLAM HCL     | Hydrochloride      |
|             |                   | Midazolam          |
| 66860014602 | MIDAZOLAM HCL     | Hydrochloride      |
| 67253090009 | ALPRAZOLAM        | Alprazolam         |
| 67253090010 | ALPRAZOLAM        | Alprazolam         |
| 67253090011 | ALPRAZOLAM        | Alprazolam         |
| 67253090050 | ALPRAZOLAM        | Alprazolam         |
| 67253090110 | ALPRAZOLAM        | Alprazolam         |
| 67253090111 | ALPRAZOLAM        | Alprazolam         |

|             |                         |                                   |
|-------------|-------------------------|-----------------------------------|
| 67253090150 | ALPRAZOLAM              | Alprazolam                        |
| 67253090210 | ALPRAZOLAM              | Alprazolam                        |
| 67253090211 | ALPRAZOLAM              | Alprazolam                        |
| 67253090250 | ALPRAZOLAM              | Alprazolam                        |
| 67253090310 | ALPRAZOLAM              | Alprazolam                        |
| 67253090350 | ALPRAZOLAM              | Alprazolam                        |
| 67386030101 | TRANXENE T-TAB          | Clorazepate<br>Dipotassium        |
| 67386030201 | TRANXENE T-TAB          | Clorazepate<br>Dipotassium        |
| 67386030205 | TRANXENE T-TAB          | Clorazepate<br>Dipotassium        |
| 67386030301 | TRANXENE T-TAB          | Clorazepate<br>Dipotassium        |
| 67386040401 | TRANXENE-SD             | Clorazepate<br>Dipotassium        |
| 67386040501 | TRANXENE-SD             | Clorazepate<br>Dipotassium        |
| 67877014601 | TEMAZEPAM               | Temazepam                         |
| 67877014605 | TEMAZEPAM               | Temazepam                         |
| 67877014701 | TEMAZEPAM               | Temazepam                         |
| 67877014705 | TEMAZEPAM               | Temazepam                         |
| 67877014801 | TEMAZEPAM               | Temazepam                         |
| 67877014930 | TEMAZEPAM               | Temazepam                         |
| 68071022020 | FLURAZEPAM HCL          | Flurazepam<br>Hydrochloride       |
| 68071022030 | FLURAZEPAM HCL          | Flurazepam<br>Hydrochloride       |
| 68071046090 | OXAZEPAM                | Oxazepam                          |
| 68071073460 | CHLORDIAZEPOXIDE<br>HCL | Chlordiazepoxide<br>Hydrochloride |
| 68071201509 | ALPRAZOLAM              | Alprazolam                        |
| 68084001801 | ALPRAZOLAM              | Alprazolam                        |
| 68084001885 | ALPRAZOLAM              | Alprazolam                        |
| 68084001901 | ALPRAZOLAM              | Alprazolam                        |
| 68084001985 | ALPRAZOLAM              | Alprazolam                        |
| 68084002001 | ALPRAZOLAM              | Alprazolam                        |
| 68084002085 | ALPRAZOLAM              | Alprazolam                        |
| 68084008801 | LORAZEPAM               | Lorazepam                         |
| 68084008811 | LORAZEPAM               | Lorazepam                         |
| 68084008901 | LORAZEPAM               | Lorazepam                         |
| 68084009001 | LORAZEPAM               | Lorazepam                         |
| 68084035901 | DIAZEPAM                | Diazepam                          |
| 68084041201 | LORAZEPAM               | Lorazepam                         |
| 68084041211 | LORAZEPAM               | Lorazepam                         |

|             |                            |                            |
|-------------|----------------------------|----------------------------|
| 68084041301 | LORAZEPAM                  | Lorazepam                  |
| 68084041311 | LORAZEPAM                  | Lorazepam                  |
| 68084041401 | LORAZEPAM                  | Lorazepam                  |
| 68084041411 | LORAZEPAM                  | Lorazepam                  |
| 68084054911 | TEMAZEPAM                  | Temazepam                  |
| 68084054921 | TEMAZEPAM                  | Temazepam                  |
| 68084064701 | ALPRAZOLAM                 | Alprazolam                 |
| 68084064711 | ALPRAZOLAM                 | Alprazolam                 |
| 68084067201 | ALPRAZOLAM                 | Alprazolam                 |
| 68084067211 | ALPRAZOLAM                 | Alprazolam                 |
| 68084073601 | LORAZEPAM                  | Lorazepam                  |
| 68084073611 | LORAZEPAM                  | Lorazepam                  |
| 68084074201 | LORAZEPAM                  | Lorazepam                  |
| 68084074211 | LORAZEPAM                  | Lorazepam                  |
| 68084075401 | LORAZEPAM                  | Lorazepam                  |
| 68084075411 | LORAZEPAM                  | Lorazepam                  |
|             | CLORAZEPATE                | Clorazepate                |
| 68084078411 | DIPOTASSIUM<br>CLORAZEPATE | Dipotassium<br>Clorazepate |
| 68084078421 | DIPOTASSIUM                | Dipotassium<br>Midazolam   |
| 68094071659 | MIDAZOLAM HCL              | Hydrochloride<br>Midazolam |
| 68094071662 | MIDAZOLAM HCL              | Hydrochloride              |
| 68094075059 | DIAZEPAM                   | Diazepam                   |
| 68094075062 | DIAZEPAM                   | Diazepam<br>Midazolam      |
| 68094076259 | MIDAZOLAM HCL              | Hydrochloride<br>Midazolam |
| 68094076262 | MIDAZOLAM HCL              | Hydrochloride<br>Midazolam |
| 68094076459 | MIDAZOLAM HCL              | Hydrochloride<br>Midazolam |
| 68094076462 | MIDAZOLAM HCL              | Hydrochloride              |
| 68115001400 | ALPRAZOLAM                 | Alprazolam                 |
| 68115001406 | ALPRAZOLAM                 | Alprazolam                 |
| 68115001420 | ALPRAZOLAM                 | Alprazolam                 |
| 68115001430 | ALPRAZOLAM                 | Alprazolam                 |
| 68115001448 | ALPRAZOLAM                 | Alprazolam                 |
| 68115001460 | ALPRAZOLAM                 | Alprazolam                 |
| 68115001490 | ALPRAZOLAM                 | Alprazolam                 |
| 68115001500 | ALPRAZOLAM                 | Alprazolam                 |
| 68115001506 | ALPRAZOLAM                 | Alprazolam                 |
| 68115001510 | ALPRAZOLAM                 | Alprazolam                 |

|             |                  |                  |
|-------------|------------------|------------------|
| 68115001520 | ALPRAZOLAM       | Alprazolam       |
| 68115001530 | ALPRAZOLAM       | Alprazolam       |
| 68115001540 | ALPRAZOLAM       | Alprazolam       |
| 68115001545 | ALPRAZOLAM       | Alprazolam       |
| 68115001560 | ALPRAZOLAM       | Alprazolam       |
| 68115001590 | ALPRAZOLAM       | Alprazolam       |
| 68115001600 | ALPRAZOLAM       | Alprazolam       |
| 68115001615 | ALPRAZOLAM       | Alprazolam       |
| 68115001621 | ALPRAZOLAM       | Alprazolam       |
| 68115001628 | ALPRAZOLAM       | Alprazolam       |
| 68115001630 | ALPRAZOLAM       | Alprazolam       |
| 68115001660 | ALPRAZOLAM       | Alprazolam       |
| 68115001690 | ALPRAZOLAM       | Alprazolam       |
| 68115001700 | ALPRAZOLAM       | Alprazolam       |
| 68115001721 | ALPRAZOLAM       | Alprazolam       |
| 68115001728 | ALPRAZOLAM       | Alprazolam       |
| 68115001730 | ALPRAZOLAM       | Alprazolam       |
| 68115001760 | ALPRAZOLAM       | Alprazolam       |
| 68115001796 | ALPRAZOLAM       | Alprazolam       |
| 68115001799 | ALPRAZOLAM       | Alprazolam       |
|             | CHLORDIAZEPOXIDE | Chlordiazepoxide |
| 68115007430 | HCL              | Hydrochloride    |
| 68115009800 | DIAZEPAM         | Diazepam         |
| 68115009801 | DIAZEPAM         | Diazepam         |
| 68115009802 | DIAZEPAM         | Diazepam         |
| 68115009810 | DIAZEPAM         | Diazepam         |
| 68115009815 | DIAZEPAM         | Diazepam         |
| 68115009830 | DIAZEPAM         | Diazepam         |
| 68115009860 | DIAZEPAM         | Diazepam         |
| 68115009890 | DIAZEPAM         | Diazepam         |
| 68115009896 | DIAZEPAM         | Diazepam         |
| 68115009899 | DIAZEPAM         | Diazepam         |
| 68115009915 | DIAZEPAM         | Diazepam         |
| 68115009930 | DIAZEPAM         | Diazepam         |
| 68115010001 | DIAZEPAM         | Diazepam         |
| 68115010002 | DIAZEPAM         | Diazepam         |
| 68115010006 | DIAZEPAM         | Diazepam         |
| 68115010010 | DIAZEPAM         | Diazepam         |
| 68115010015 | DIAZEPAM         | Diazepam         |
| 68115010020 | DIAZEPAM         | Diazepam         |
| 68115010030 | DIAZEPAM         | Diazepam         |
| 68115010060 | DIAZEPAM         | Diazepam         |
| 68115010090 | DIAZEPAM         | Diazepam         |

|             |                |                             |
|-------------|----------------|-----------------------------|
| 68115014600 | FLURAZEPAM     | Flurazepam<br>Hydrochloride |
| 68115014614 | FLURAZEPAM HCL | Flurazepam<br>Hydrochloride |
| 68115014630 | FLURAZEPAM HCL | Flurazepam<br>Hydrochloride |
| 68115014648 | FLURAZEPAM     | Flurazepam<br>Hydrochloride |
| 68115014660 | FLURAZEPAM HCL | Flurazepam<br>Hydrochloride |
| 68115021100 | LORAZEPAM      | Lorazepam                   |
| 68115021102 | LORAZEPAM      | Lorazepam                   |
| 68115021103 | LORAZEPAM      | Lorazepam                   |
| 68115021106 | LORAZEPAM      | Lorazepam                   |
| 68115021114 | LORAZEPAM      | Lorazepam                   |
| 68115021130 | LORAZEPAM      | Lorazepam                   |
| 68115021140 | LORAZEPAM      | Lorazepam                   |
| 68115021160 | LORAZEPAM      | Lorazepam                   |
| 68115021190 | LORAZEPAM      | Lorazepam                   |
| 68115021200 | LORAZEPAM      | Lorazepam                   |
| 68115021215 | LORAZEPAM      | Lorazepam                   |
| 68115021220 | LORAZEPAM      | Lorazepam                   |
| 68115021230 | LORAZEPAM      | Lorazepam                   |
| 68115021260 | LORAZEPAM      | Lorazepam                   |
| 68115021290 | LORAZEPAM      | Lorazepam                   |
| 68115032300 | TEMAZEPAM      | Temazepam                   |
| 68115032320 | TEMAZEPAM      | Temazepam                   |
| 68115032330 | TEMAZEPAM      | Temazepam                   |
| 68115032360 | TEMAZEPAM      | Temazepam                   |
| 68115032400 | TEMAZEPAM      | Temazepam                   |
| 68115032430 | TEMAZEPAM      | Temazepam                   |
| 68115032460 | TEMAZEPAM      | Temazepam                   |
| 68115037920 | TRIAZOLAM      | Triazolam                   |
| 68115037960 | TRIAZOLAM      | Triazolam                   |
| 68115039800 | LORAZEPAM      | Lorazepam                   |
| 68115039830 | LORAZEPAM      | Lorazepam                   |
| 68115039860 | LORAZEPAM      | Lorazepam<br>Flurazepam     |
| 68115040100 | FLURAZEPAM     | Flurazepam<br>Hydrochloride |
| 68115040120 | FLURAZEPAM HCL | Flurazepam<br>Hydrochloride |
| 68115040130 | FLURAZEPAM HCL | Flurazepam<br>Hydrochloride |
| 68115040160 | FLURAZEPAM HCL | Flurazepam<br>Hydrochloride |

|             |                |               |
|-------------|----------------|---------------|
|             | CLORAZEPATE    | Clorazepate   |
| 68115042630 | DIPOTASSIUM    | Dipotassium   |
| 68115043430 | TRIAZOLAM      | Triazolam     |
| 68115066200 | ESTAZOLAM      | Estazolam     |
| 68115066230 | ESTAZOLAM      | Estazolam     |
| 68115073600 | ATIVAN         | Lorazepam     |
|             | CLORAZEPATE    | Clorazepate   |
| 68258701203 | DIPOTASSIUM    | Dipotassium   |
| 68258896305 | DIAZEPAM       | Diazepam      |
|             |                | Midazolam     |
| 68258897301 | MIDAZOLAM HCL  | Hydrochloride |
|             |                | Midazolam     |
| 68258898101 | MIDAZOLAM HCL  | Hydrochloride |
|             |                | Midazolam     |
| 68258899101 | MIDAZOLAM HCL  | Hydrochloride |
| 68387019524 | TEMAZEPAM      | Temazepam     |
| 68387019530 | TEMAZEPAM      | Temazepam     |
| 68387019630 | TEMAZEPAM      | Temazepam     |
| 68387046018 | ALPRAZOLAM     | Alprazolam    |
| 68387046030 | ALPRAZOLAM     | Alprazolam    |
| 68387046060 | ALPRAZOLAM     | Alprazolam    |
| 68387046090 | ALPRAZOLAM     | Alprazolam    |
| 68387046530 | ALPRAZOLAM     | Alprazolam    |
| 68387046545 | ALPRAZOLAM     | Alprazolam    |
| 68387046560 | ALPRAZOLAM     | Alprazolam    |
| 68387046590 | ALPRAZOLAM     | Alprazolam    |
| 68387046630 | ALPRAZOLAM     | Alprazolam    |
| 68387046645 | ALPRAZOLAM     | Alprazolam    |
| 68387046660 | ALPRAZOLAM     | Alprazolam    |
| 68387046690 | ALPRAZOLAM     | Alprazolam    |
| 68387047430 | DIAZEPAM       | Diazepam      |
| 68387047501 | DIAZEPAM       | Diazepam      |
| 68387047520 | DIAZEPAM       | Diazepam      |
| 68387047530 | DIAZEPAM       | Diazepam      |
| 68387047590 | DIAZEPAM       | Diazepam      |
|             | CLORAZEPATE    | Clorazepate   |
| 68387051090 | DIPOTASSIUM    | Dipotassium   |
|             |                | Clorazepate   |
| 68387051190 | CLORAZEPATE    | Dipotassium   |
| 68387053015 | TRIAZOLAM      | Triazolam     |
| 68387053030 | TRIAZOLAM      | Triazolam     |
|             |                | Flurazepam    |
| 68387061015 | FLURAZEPAM HCL | Hydrochloride |
|             |                | Flurazepam    |
| 68387061030 | FLURAZEPAM HCL | Hydrochloride |

|             |                  |                  |
|-------------|------------------|------------------|
| 69315090401 | LORAZEPAM        | Lorazepam        |
| 69315090405 | LORAZEPAM        | Lorazepam        |
| 69315090410 | LORAZEPAM        | Lorazepam        |
| 69315090501 | LORAZEPAM        | Lorazepam        |
| 69315090505 | LORAZEPAM        | Lorazepam        |
| 69315090510 | LORAZEPAM        | Lorazepam        |
| 69315090601 | LORAZEPAM        | Lorazepam        |
| 69315090605 | LORAZEPAM        | Lorazepam        |
| 69315090610 | LORAZEPAM        | Lorazepam        |
| 69452011020 | ALPRAZOLAM       | Alprazolam       |
| 69452011030 | ALPRAZOLAM       | Alprazolam       |
| 69452011032 | ALPRAZOLAM       | Alprazolam       |
| 69452011120 | ALPRAZOLAM       | Alprazolam       |
| 69452011130 | ALPRAZOLAM       | Alprazolam       |
| 69452011132 | ALPRAZOLAM       | Alprazolam       |
| 69452011220 | ALPRAZOLAM       | Alprazolam       |
| 69452011230 | ALPRAZOLAM       | Alprazolam       |
| 69452011232 | ALPRAZOLAM       | Alprazolam       |
| 69452011320 | ALPRAZOLAM       | Alprazolam       |
| 69452011330 | ALPRAZOLAM       | Alprazolam       |
| 69874032210 | QUAZEPAM         | Quazepam         |
|             |                  | Midazolam        |
| 76045000120 | MIDAZOLAM        | Hydrochloride    |
|             |                  | Midazolam        |
| 76045000210 | MIDAZOLAM        | Hydrochloride    |
|             |                  | Midazolam        |
| 76045000320 | MIDAZOLAM        | Hydrochloride    |
| 76218040501 | QUAZEPAM         | Quazepam         |
| 76329826101 | LORAZEPAM        | Lorazepam        |
| 99999000020 | TEMAZEPAM        | Temazepam        |
|             | CHLORDIAZEPOXIDE | Chlordiazepoxide |
| 99999000101 | HCL              | Hydrochloride    |
|             | CHLORDIAZEPOXIDE | Chlordiazepoxide |
| 99999000102 | HCL              | Hydrochloride    |
|             | CHLORDIAZEPOXIDE | Chlordiazepoxide |
| 99999000103 | HCL              | Hydrochloride    |
| 99999000112 | OXAZEPAM         | Oxazepam         |
| 99999000113 | OXAZEPAM         | Oxazepam         |
| 99999000114 | OXAZEPAM         | Oxazepam         |
| 99999000115 | OXAZEPAM         | Oxazepam         |
| 99999000116 | OXAZEPAM         | Oxazepam         |
| 99999000117 | OXAZEPAM         | Oxazepam         |
|             |                  | Flurazepam       |
| 99999001201 | FLURAZEPAM HCL   | Hydrochloride    |

|             |                            |                                   |
|-------------|----------------------------|-----------------------------------|
| 99999001316 | LORAZEPAM                  | Lorazepam                         |
| 99999001317 | LORAZEPAM                  | Lorazepam                         |
| 99999001318 | LORAZEPAM                  | Lorazepam<br>Flurazepam           |
| 99999003310 | FLURAZEPAM HCL             | Hydrochloride                     |
| 99999004501 | TEMAZEPAM                  | Temazepam                         |
| 99999004522 | CHLORDIAZEPOXIDE<br>HCL    | Chlordiazepoxide<br>Hydrochloride |
| 99999005590 | CHLORDIAZEPOXIDE<br>HCL    | Chlordiazepoxide<br>Hydrochloride |
| 99999011100 | CHLORDIAZEPOXIDE<br>HCL    | Chlordiazepoxide<br>Hydrochloride |
| 99999022255 | DIAZEPAM                   | Diazepam                          |
| 99999022260 | DIAZEPAM                   | Diazepam                          |
| 99999022265 | DIAZEPAM                   | Diazepam                          |
| 99999054132 | CLORAZEPATE<br>DIPOTASSIUM | Clorazepate<br>Dipotassium        |
| 99999074132 | CLORAZEPATE<br>DIPOTASSIUM | Clorazepate<br>Dipotassium        |
| 99999094132 | CLORAZEPATE<br>DIPOTASSIUM | Clorazepate<br>Dipotassium        |
| 99999099902 | CLORAZEPATE<br>DIPOTASSIUM | Clorazepate<br>Dipotassium        |
| 99999099903 | CLORAZEPATE<br>DIPOTASSIUM | Clorazepate<br>Dipotassium        |
| 99999213789 | ALPRAZOLAM                 | Alprazolam                        |
| 99999215643 | ALPRAZOLAM                 | Alprazolam                        |
| 99999222206 | CLORAZEPATE<br>DIPOTASSIUM | Clorazepate<br>Dipotassium        |
| 99999600090 | TEMAZEPAM                  | Temazepam                         |
| 99999600091 | TEMAZEPAM<br>APAP          | Temazepam                         |
| 99999606760 | W/HYDROCODONE              | Alprazolam                        |
| 99999631076 | ALPRAZOLAM                 | Alprazolam                        |
| 99999667701 | ALPRAZOLAM                 | Alprazolam                        |
| 99999667801 | ALPRAZOLAM                 | Alprazolam                        |
| 99999667901 | ALPRAZOLAM                 | Alprazolam                        |
| 99999674310 | ALPRAZOLAM                 | Alprazolam                        |
| 99999675410 | ALPRAZOLAM                 | Alprazolam                        |
